# Supplementary material for: Intrahost dynamics, together with genetic and phenotypic traits predict the success of viral mutations
Source: Research Square preprint supplement (doi:10.21203/rs.3.rs-5298116/v1), 2024-11-15
Supplement: Supplementary file 2 [file bcc741633e93de09945acd01.xlsx]

## Sheet: Supplementary Table 1a
						Intrahost predictors			Physiochemical predictors							DMS predictors
Timeframe	Protein name	Mutation name	Reference AA	Codon position	Variant AA	No. libraries	Median intrahost freq.	Maximum intrahost freq.	BLOSUM62 score	Change in charge	Change in MW	Change in hydropathy	Absolute charge change	Absolute MW change	Absolute hydropathy change	Change in RBD binding	Change in RBD expression	Mean antibody escape	Future fitness	Prior fitness	Future freq. >10%	Future freq. >90%
Early	E	E_A22V	A	22	V	2	0.05165	0.0571	0	-0.0618862	28.0531	2.4	0.0618862	28.0531	2.4				251	1	FALSE	FALSE
Early	E	E_A32V	A	32	V	1	0.2843	0.2843	0	-0.0618862	28.0531	2.4	0.0618862	28.0531	2.4				214	0	FALSE	FALSE
Early	E	E_A36V	A	36	V	1	0.0565	0.0565	0	-0.0618862	28.0531	2.4	0.0618862	28.0531	2.4				351	2	FALSE	FALSE
Early	E	E_D72A	D	72	A	1	0.2253	0.2253	-2	1.03147	-44.0095	5.3	1.03147	44.0095	5.3				105	0	FALSE	FALSE
Early	E	E_D72V	D	72	V	1	0.0326	0.0326	-3	0.969585	-15.9564	7.7	0.969585	15.9564	7.7				59	0	FALSE	FALSE
Early	E	E_E8D	E	8	D	8	0.03515	0.0524	2	-0.0776616	-14.0266	0	0.0776616	14.0266	0				606	1	FALSE	FALSE
Early	E	E_E8Q	E	8	Q	1	0.0406	0.0406	2	0.918037	-0.9848	0	0.918037	0.9848	0				2	0	FALSE	FALSE
Early	E	E_F20I	F	20	I	1	0.0454	0.0454	0	0	-34.0162	1.7	0	34.0162	1.7				57	0	FALSE	FALSE
Early	E	E_F26H	F	26	H	1	0.154	0.154	-1	0.0871742	-10.0345	-6	0.0871742	10.0345	6				0	0	FALSE	FALSE
Early	E	E_K63N	K	63	N	15	0.128	0.1674	0	-0.999001	-14.0697	0.4	0.999001	14.0697	0.4				19	0	FALSE	FALSE
Early	E	E_L18Q	L	18	Q	1	0.0335	0.0335	-2	0	14.9716	-7.3	0	14.9716	7.3				0	0	FALSE	FALSE
Early	E	E_L19P	L	19	P	1	0.0464	0.0464	-3	0.198427	-16.0424	-5.4	0.198427	16.0424	5.4				17	0	FALSE	FALSE
Early	E	E_L27F	L	27	F	2	0.04485	0.0583	0	0	34.0162	-1	0	34.0162	1				78	1	FALSE	FALSE
Early	E	E_L28P	L	28	P	1	0.0301	0.0301	-3	0.198427	-16.0424	-5.4	0.198427	16.0424	5.4				15	0	FALSE	FALSE
Early	E	E_L28V	L	28	V	1	0.0451	0.0451	1	-0.0261132	-14.0266	0.4	0.0261132	14.0266	0.4				9	0	FALSE	FALSE
Early	E	E_L37F	L	37	F	7	0.1549	0.1866	0	0	34.0162	-1	0	34.0162	1				333	1	FALSE	FALSE
Early	E	E_L37H	L	37	H	7	0.1092	0.3295	-3	0.0871742	23.9817	-7	0.0871742	23.9817	7				10	1	FALSE	FALSE
Early	E	E_L37R	L	37	R	5	0.0523	0.0524	-2	0.99999	43.0281	-8.3	0.99999	43.0281	8.3				9	1	FALSE	FALSE
Early	E	E_L39F	L	39	F	1	0.0544	0.0544	0	0	34.0162	-1	0	34.0162	1				16	0	FALSE	FALSE
Early	E	E_L39V	L	39	V	1	0.0308	0.0308	1	-0.0261132	-14.0266	0.4	0.0261132	14.0266	0.4				8	0	FALSE	FALSE
Early	E	E_L51I	L	51	I	1	0.1426	0.1426	2	0	0	0.7	0	0	0.7				747	0	FALSE	FALSE
Early	E	E_L51Q	L	51	Q	5	0.053	0.0705	-2	0	14.9716	-7.3	0	14.9716	7.3				0	0	FALSE	FALSE
Early	E	E_L65P	L	65	P	2	0.06975	0.0964	-3	0.198427	-16.0424	-5.4	0.198427	16.0424	5.4				11	1	FALSE	FALSE
Early	E	E_L65Q	L	65	Q	1	0.0435	0.0435	-2	0	14.9716	-7.3	0	14.9716	7.3				3	0	FALSE	FALSE
Early	E	E_L65R	L	65	R	1	0.0679	0.0679	-2	0.99999	43.0281	-8.3	0.99999	43.0281	8.3				3	0	FALSE	FALSE
Early	E	E_M1I	M	1	I	1	0.0343	0.0343	1	0.259747	-18.0384	2.6	0.259747	18.0384	2.6				3	0	FALSE	FALSE
Early	E	E_N48T	N	48	T	1	0.0357	0.0357	0	-0.361905	-12.9987	2.8	0.361905	12.9987	2.8				3	0	FALSE	FALSE
Early	E	E_N66K	N	66	K	1	0.0336	0.0336	0	0.999001	14.0697	-0.4	0.999001	14.0697	0.4				386	0	FALSE	FALSE
Early	E	E_P54L	P	54	L	1	0.0567	0.0567	-3	-0.198427	16.0424	5.4	0.198427	16.0424	5.4				33	0	FALSE	FALSE
Early	E	E_P54S	P	54	S	1	0.0984	0.0984	-1	-0.498382	-10.0379	0.8	0.498382	10.0379	0.8				19	1	FALSE	FALSE
Early	E	E_P71L	P	71	L	2	0.0346	0.0381	-3	-0.198427	16.0424	5.4	0.198427	16.0424	5.4				25852	20	FALSE	FALSE
Early	E	E_R61H	R	61	H	4	0.03615	0.0388	0	-0.912816	-19.0464	1.3	0.912816	19.0464	1.3				422	4	FALSE	FALSE
Early	E	E_R69K	R	69	K	6	0.03565	0.202	2	-0.000989001	-28.0134	0.6	0.000989001	28.0134	0.6				138	0	FALSE	FALSE
Early	E	E_R69T	R	69	T	3	0.0444	0.0814	-1	-1.3619	-55.0818	3.8	1.3619	55.0818	3.8				44	0	FALSE	FALSE
Early	E	E_S50G	S	50	G	1	0.0416	0.0416	0	0.299955	-30.026	0.4	0.299955	30.026	0.4				2831	3	FALSE	FALSE
Early	E	E_S55F	S	55	F	1	0.0614	0.0614	-2	0.299955	60.0965	3.6	0.299955	60.0965	3.6				8155	11	FALSE	FALSE
Early	E	E_S60N	S	60	N	1	0.0348	0.0348	1	0.299955	27.0253	-2.7	0.299955	27.0253	2.7				1	0	FALSE	FALSE
Early	E	E_S67Q	S	67	Q	1	0.0967	0.0967	0	0.299955	41.0519	-2.7	0.299955	41.0519	2.7				0	0	FALSE	FALSE
Early	E	E_S67T	S	67	T	1	0.046	0.046	1	-0.0619499	14.0266	0.1	0.0619499	14.0266	0.1				6	0	FALSE	FALSE
Early	E	E_S67Y	S	67	Y	1	0.0349	0.0349	-2	0.298956	76.0959	-0.5	0.298956	76.0959	0.5				20	0	FALSE	FALSE
Early	E	E_S68H	S	68	H	3	0.0376	0.0388	-1	0.387129	50.062	-2.4	0.387129	50.062	2.4				0	0	FALSE	FALSE
Early	E	E_S68N	S	68	N	5	0.1053	0.3739	1	0.299955	27.0253	-2.7	0.299955	27.0253	2.7				0	0	FALSE	FALSE
Early	E	E_S68T	S	68	T	1	0.17	0.17	1	-0.0619499	14.0266	0.1	0.0619499	14.0266	0.1				16	0	FALSE	FALSE
Early	E	E_S6L	S	6	L	3	0.0428	0.4572	-2	0.299955	26.0803	4.6	0.299955	26.0803	4.6				51	1	FALSE	FALSE
Early	E	E_S6P	S	6	P	1	0.0323	0.0323	-1	0.498382	10.0379	-0.8	0.498382	10.0379	0.8				80	0	FALSE	FALSE
Early	E	E_S6T	S	6	T	1	0.0359	0.0359	1	-0.0619499	14.0266	0.1	0.0619499	14.0266	0.1				71	0	FALSE	FALSE
Early	E	E_T11A	T	11	A	5	0.0338	0.055	0	0.397678	-30.026	2.5	0.397678	30.026	2.5				1099174	0	TRUE	TRUE
Early	E	E_T30I	T	30	I	4	0.05815	0.8083	-1	0.361905	12.0537	5.2	0.361905	12.0537	5.2				922	7	FALSE	FALSE
Early	E	E_T9I	T	9	I	5	0.0339	0.0487	-1	0.361905	12.0537	5.2	0.361905	12.0537	5.2				3941062	12	TRUE	TRUE
Early	E	E_T9P	T	9	P	1	0.0301	0.0301	-1	0.560332	-3.9887	-0.9	0.560332	3.9887	0.9				0	0	FALSE	FALSE
Early	E	E_V14N	V	14	N	1	0.0361	0.0361	-3	0.0261132	14.9716	-7.7	0.0261132	14.9716	7.7				0	0	FALSE	FALSE
Early	E	E_V17L	V	17	L	1	0.2453	0.2453	1	0.0261132	14.0266	-0.4	0.0261132	14.0266	0.4				194	1	FALSE	FALSE
Early	E	E_V24L	V	24	L	1	0.0498	0.0498	1	0.0261132	14.0266	-0.4	0.0261132	14.0266	0.4				2816	8	FALSE	FALSE
Early	E	E_V25A	V	25	A	1	0.0373	0.0373	0	0.0618862	-28.0531	-2.4	0.0618862	28.0531	2.4				129	5	FALSE	FALSE
Early	E	E_V49L	V	49	L	1	0.282	0.282	1	0.0261132	14.0266	-0.4	0.0261132	14.0266	0.4				1974	9	FALSE	FALSE
Early	E	E_V52T	V	52	T	3	0.0403	0.0587	0	-0.335792	1.9729	-4.9	0.335792	1.9729	4.9				0	0	FALSE	FALSE
Early	E	E_V58K	V	58	K	2	0.03945	0.0417	-2	1.02511	29.0413	-8.1	1.02511	29.0413	8.1				0	0	FALSE	FALSE
Early	E	E_V58L	V	58	L	1	0.0505	0.0505	1	0.0261132	14.0266	-0.4	0.0261132	14.0266	0.4				721	4	FALSE	FALSE
Early	E	E_V62F	V	62	F	1	0.0345	0.0345	-1	0.0261132	48.0428	-1.4	0.0261132	48.0428	1.4				20150	4	FALSE	FALSE
Early	E	E_V62I	V	62	I	1	0.1089	0.1089	3	0.0261132	14.0266	0.3	0.0261132	14.0266	0.3				568	0	FALSE	FALSE
Early	E	E_V70D	V	70	D	1	0.0372	0.0372	-3	-0.969585	15.9564	-7.7	0.969585	15.9564	7.7				3	0	FALSE	FALSE
Early	E	E_V70L	V	70	L	9	0.0494	0.083	1	0.0261132	14.0266	-0.4	0.0261132	14.0266	0.4				23	1	FALSE	FALSE
Early	E	E_Y2F	Y	2	F	1	0.0688	0.0688	3	0.000999001	-15.9994	4.1	0.000999001	15.9994	4.1				0	0	FALSE	FALSE
Early	E	E_Y42C	Y	42	C	1	0.0557	0.0557	-2	-0.00890199	-60.0303	3.8	0.00890199	60.0303	3.8				63	0	FALSE	FALSE
Early	M	M_A104V	A	104	V	1	0.051	0.051	0	-0.0618862	28.0531	2.4	0.0618862	28.0531	2.4				281308	2	TRUE	TRUE
Early	M	M_A152V	A	152	V	1	0.0349	0.0349	0	-0.0618862	28.0531	2.4	0.0618862	28.0531	2.4				4	1	FALSE	FALSE
Early	M	M_A171C	A	171	C	16	0.0749	0.1829	0	-0.045674	32.065	0.7	0.045674	32.065	0.7				4	0	FALSE	FALSE
Early	M	M_A194G	A	194	G	1	0.0726	0.0726	0	-0.035773	-14.0266	-2.2	0.035773	14.0266	2.2				8	0	FALSE	FALSE
Early	M	M_A195T	A	195	T	1	0.0303	0.0303	0	-0.397678	30.026	-2.5	0.397678	30.026	2.5				4	0	FALSE	FALSE
Early	M	M_A218V	A	218	V	1	0.2037	0.2037	0	-0.0618862	28.0531	2.4	0.0618862	28.0531	2.4				13	0	FALSE	FALSE
Early	M	M_A2T	A	2	T	1	0.048	0.048	0	-0.397678	30.026	-2.5	0.397678	30.026	2.5				1199	1	FALSE	FALSE
Early	M	M_A63D	A	63	D	2	0.0584	0.0584	-2	-1.03147	44.0095	-5.3	1.03147	44.0095	5.3				3	0	FALSE	FALSE
Early	M	M_A63F	A	63	F	1	0.0457	0.0457	-2	-0.035773	76.0959	1	0.035773	76.0959	1				4	0	FALSE	FALSE
Early	M	M_A63T	A	63	T	2	0.03305	0.035	0	-0.397678	30.026	-2.5	0.397678	30.026	2.5				3939651	11	TRUE	TRUE
Early	M	M_A63V	A	63	V	1	0.0324	0.0324	0	-0.0618862	28.0531	2.4	0.0618862	28.0531	2.4				342	0	FALSE	FALSE
Early	M	M_A68D	A	68	D	2	0.1008	0.1663	-2	-1.03147	44.0095	-5.3	1.03147	44.0095	5.3				7	0	FALSE	FALSE
Early	M	M_A83S	A	83	S	2	0.044	0.0457	1	-0.335728	15.9994	-2.6	0.335728	15.9994	2.6				857	2	FALSE	FALSE
Early	M	M_A85D	A	85	D	5	0.0393	0.1406	-2	-1.03147	44.0095	-5.3	1.03147	44.0095	5.3				17	2	FALSE	FALSE
Early	M	M_A85V	A	85	V	1	0.0889	0.0889	0	-0.0618862	28.0531	2.4	0.0618862	28.0531	2.4				1517	3	FALSE	FALSE
Early	M	M_C33F	C	33	F	2	0.27935	0.4198	-2	0.00990099	44.0309	0.3	0.00990099	44.0309	0.3				1529	2	FALSE	FALSE
Early	M	M_C64S	C	64	S	2	0.0359	0.0359	-1	-0.290054	-16.0656	-3.3	0.290054	16.0656	3.3				246	0	FALSE	FALSE
Early	M	M_D160H	D	160	H	1	0.043	0.043	-1	1.08287	22.0519	0.3	1.08287	22.0519	0.3				6	0	FALSE	FALSE
Early	M	M_D209A	D	209	A	1	0.0323	0.0323	-2	1.03147	-44.0095	5.3	1.03147	44.0095	5.3				47	0	FALSE	FALSE
Early	M	M_D209H	D	209	H	1	0.9973	0.9973	-1	1.08287	22.0519	0.3	1.08287	22.0519	0.3				376	14	FALSE	FALSE
Early	M	M_D3A	D	3	A	1	0.0672	0.0672	-2	1.03147	-44.0095	5.3	1.03147	44.0095	5.3				53	0	FALSE	FALSE
Early	M	M_D3G	D	3	G	7	0.7937	0.9938	-1	0.995698	-58.0361	3.1	0.995698	58.0361	3.1				428240	672	TRUE	FALSE
Early	M	M_D3H	D	3	H	1	0.0303	0.0303	-1	1.08287	22.0519	0.3	1.08287	22.0519	0.3				266635	1	TRUE	TRUE
Early	M	M_D3N	D	3	N	1	0.0644	0.0644	1	0.995698	-0.9848	0	0.995698	0.9848	0				1239579	1	TRUE	FALSE
Early	M	M_D3V	D	3	V	1	0.0332	0.0332	-3	0.969585	-15.9564	7.7	0.969585	15.9564	7.7				139	3	FALSE	FALSE
Early	M	M_D3Y	D	3	Y	9	0.0417	0.1111	-3	0.994699	48.0858	2.2	0.994699	48.0858	2.2				1016	4	FALSE	FALSE
Early	M	M_E167P	E	167	P	10	0.07275	0.1087	-1	1.11646	-31.9988	1.9	1.11646	31.9988	1.9				0	0	FALSE	FALSE
Early	M	M_E167Q	E	167	Q	6	0.04035	0.0448	2	0.918037	-0.9848	0	0.918037	0.9848	0				514	0	FALSE	FALSE
Early	M	M_E167Y	E	167	Y	2	0.03015	0.0302	-2	0.917038	34.0592	2.2	0.917038	34.0592	2.2				0	0	FALSE	FALSE
Early	M	M_E18G	E	18	G	1	0.0408	0.0408	-2	0.918037	-72.0627	3.1	0.918037	72.0627	3.1				2	0	FALSE	FALSE
Early	M	M_F100S	F	100	S	1	0.0755	0.0755	-2	-0.299955	-60.0965	-3.6	0.299955	60.0965	3.6				89	0	FALSE	FALSE
Early	M	M_F45L	F	45	L	2	0.0385	0.044	0	0	-34.0162	1	0	34.0162	1				150	0	FALSE	FALSE
Early	M	M_F45Q	F	45	Q	10	0.0701	0.1182	-3	0	-19.0446	-6.3	0	19.0446	6.3				0	0	FALSE	FALSE
Early	M	M_F65L	F	65	L	1	0.0334	0.0334	0	0	-34.0162	1	0	34.0162	1				57	0	FALSE	FALSE
Early	M	M_F65V	F	65	V	1	0.086	0.086	-1	-0.0261132	-48.0428	1.4	0.0261132	48.0428	1.4				4	0	FALSE	FALSE
Early	M	M_G126S	G	126	S	1	0.189	0.189	0	-0.299955	30.026	-0.4	0.299955	30.026	0.4				160	0	FALSE	FALSE
Early	M	M_G157E	G	157	E	1	0.0396	0.0396	-2	-0.918037	72.0627	-3.1	0.918037	72.0627	3.1				10	0	FALSE	FALSE
Early	M	M_G192S	G	192	S	1	0.0938	0.0938	0	-0.299955	30.026	-0.4	0.299955	30.026	0.4				8	0	FALSE	FALSE
Early	M	M_G202C	G	202	C	1	0.0339	0.0339	-3	-0.00990099	46.0916	2.9	0.00990099	46.0916	2.9				0	0	FALSE	FALSE
Early	M	M_G25A	G	25	A	1	0.041	0.041	0	0.035773	14.0266	2.2	0.035773	14.0266	2.2				12	0	FALSE	FALSE
Early	M	M_G25V	G	25	V	2	0.07635	0.0929	-3	-0.0261132	42.0797	4.6	0.0261132	42.0797	4.6				17	1	FALSE	FALSE
Early	M	M_G78V	G	78	V	1	0.0363	0.0363	-3	-0.0261132	42.0797	4.6	0.0261132	42.0797	4.6				55	0	FALSE	FALSE
Early	M	M_G89R	G	89	R	1	0.0369	0.0369	-2	0.99999	99.1344	-4.1	0.99999	99.1344	4.1				14	0	FALSE	FALSE
Early	M	M_G89V	G	89	V	1	0.0323	0.0323	-3	-0.0261132	42.0797	4.6	0.0261132	42.0797	4.6				36	0	FALSE	FALSE
Early	M	M_I168L	I	168	L	2	0.0474	0.0564	2	0	0	-0.7	0	0	0.7				235	0	FALSE	FALSE
Early	M	M_I168T	I	168	T	13	0.0734	0.142	-1	-0.361905	-12.0537	-5.2	0.361905	12.0537	5.2				1	0	FALSE	FALSE
Early	M	M_I201L	I	201	L	1	0.0508	0.0508	2	0	0	-0.7	0	0	0.7				17	0	FALSE	FALSE
Early	M	M_I24Q	I	24	Q	2	0.122	0.2038	-3	0	14.9716	-8	0	14.9716	8				0	0	FALSE	FALSE
Early	M	M_I24R	I	24	R	1	0.0343	0.0343	-3	0.99999	43.0281	-9	0.99999	43.0281	9				4	0	FALSE	FALSE
Early	M	M_I48L	I	48	L	1	0.0541	0.0541	2	0	0	-0.7	0	0	0.7				204	0	FALSE	FALSE
Early	M	M_I80F	I	80	F	1	0.0302	0.0302	0	0	34.0162	-1.7	0	34.0162	1.7				421	0	FALSE	FALSE
Early	M	M_I80N	I	80	N	1	0.0548	0.0548	-3	0	0.945	-8	0	0.945	8				2	0	FALSE	FALSE
Early	M	M_I80S	I	80	S	4	0.03925	0.05	-2	-0.299955	-26.0803	-5.3	0.299955	26.0803	5.3				62	0	FALSE	FALSE
Early	M	M_I8S	I	8	S	9	0.0375	0.048	-2	-0.299955	-26.0803	-5.3	0.299955	26.0803	5.3				41	2	FALSE	FALSE
Early	M	M_K162N	K	162	N	1	0.0309	0.0309	0	-0.999001	-14.0697	0.4	0.999001	14.0697	0.4				1173	2	FALSE	FALSE
Early	M	M_K166D	K	166	D	2	0.03055	0.0306	-1	-1.9947	-13.0849	0.4	1.9947	13.0849	0.4				1	0	FALSE	FALSE
Early	M	M_K166I	K	166	I	7	0.057	0.1854	-3	-0.999001	-15.0147	8.4	0.999001	15.0147	8.4				19	0	FALSE	FALSE
Early	M	M_K166N	K	166	N	1	0.05	0.05	0	-0.999001	-14.0697	0.4	0.999001	14.0697	0.4				28	0	FALSE	FALSE
Early	M	M_K166Y	K	166	Y	2	0.03055	0.0306	-2	-1	35.0009	2.6	1	35.0009	2.6				2	0	FALSE	FALSE
Early	M	M_L119F	L	119	F	1	0.0345	0.0345	0	0	34.0162	-1	0	34.0162	1				18	0	FALSE	FALSE
Early	M	M_L129Q	L	129	Q	2	0.0699	0.08	-2	0	14.9716	-7.3	0	14.9716	7.3				129	0	FALSE	FALSE
Early	M	M_L133I	L	133	I	1	0.0351	0.0351	2	0	0	0.7	0	0	0.7				48	0	FALSE	FALSE
Early	M	M_L149I	L	149	I	1	0.0433	0.0433	2	0	0	0.7	0	0	0.7				27	0	FALSE	FALSE
Early	M	M_L16F	L	16	F	1	0.0525	0.0525	0	0	34.0162	-1	0	34.0162	1				122	7	FALSE	FALSE
Early	M	M_L16P	L	16	P	1	0.1238	0.1238	-3	0.198427	-16.0424	-5.4	0.198427	16.0424	5.4				5	0	FALSE	FALSE
Early	M	M_L176F	L	176	F	1	0.0323	0.0323	0	0	34.0162	-1	0	34.0162	1				11	0	FALSE	FALSE
Early	M	M_L176P	L	176	P	1	0.032	0.032	-3	0.198427	-16.0424	-5.4	0.198427	16.0424	5.4				180	0	FALSE	FALSE
Early	M	M_L176R	L	176	R	2	0.0486	0.0582	-2	0.99999	43.0281	-8.3	0.99999	43.0281	8.3				2	0	FALSE	FALSE
Early	M	M_L17F	L	17	F	1	0.0353	0.0353	0	0	34.0162	-1	0	34.0162	1				4234	6	FALSE	FALSE
Early	M	M_L17V	L	17	V	1	0.0497	0.0497	1	-0.0261132	-14.0266	0.4	0.0261132	14.0266	0.4				35	0	FALSE	FALSE
Early	M	M_L206F	L	206	F	2	0.03835	0.0385	0	0	34.0162	-1	0	34.0162	1				1	0	FALSE	FALSE
Early	M	M_L219F	L	219	F	1	0.1147	0.1147	0	0	34.0162	-1	0	34.0162	1				49	0	FALSE	FALSE
Early	M	M_L219S	L	219	S	1	0.0895	0.0895	-2	-0.299955	-26.0803	-4.6	0.299955	26.0803	4.6				2	0	FALSE	FALSE
Early	M	M_L220I	L	220	I	1	0.0362	0.0362	2	0	0	0.7	0	0	0.7				2	0	FALSE	FALSE
Early	M	M_L22Q	L	22	Q	1	0.0304	0.0304	-2	0	14.9716	-7.3	0	14.9716	7.3				3	0	FALSE	FALSE
Early	M	M_L56I	L	56	I	2	0.1515	0.1515	2	0	0	0.7	0	0	0.7				33	0	FALSE	FALSE
Early	M	M_L56R	L	56	R	4	0.0784	0.0833	-2	0.99999	43.0281	-8.3	0.99999	43.0281	8.3				1	0	FALSE	FALSE
Early	M	M_L57F	L	57	F	1	0.0306	0.0306	0	0	34.0162	-1	0	34.0162	1				12	0	FALSE	FALSE
Early	M	M_L57I	L	57	I	19	0.0649	0.2529	2	0	0	0.7	0	0	0.7				2	0	FALSE	FALSE
Early	M	M_L62G	L	62	G	2	0.0423	0.0423	-4	0	-56.1063	-4.2	0	56.1063	4.2				0	0	FALSE	FALSE
Early	M	M_L62I	L	62	I	2	0.0462	0.0462	2	0	0	0.7	0	0	0.7				30	0	FALSE	FALSE
Early	M	M_L62V	L	62	V	1	0.036	0.036	1	-0.0261132	-14.0266	0.4	0.0261132	14.0266	0.4				8	0	FALSE	FALSE
Early	M	M_L67F	L	67	F	7	0.0702	0.1899	0	0	34.0162	-1	0	34.0162	1				271	2	FALSE	FALSE
Early	M	M_L67I	L	67	I	3	0.0335	0.04	2	0	0	0.7	0	0	0.7				28	0	FALSE	FALSE
Early	M	M_L87I	L	87	I	1	0.0449	0.0449	2	0	0	0.7	0	0	0.7				128	0	FALSE	FALSE
Early	M	M_M109I	M	109	I	2	0.0696	0.0886	1	0.259747	-18.0384	2.6	0.259747	18.0384	2.6				2591	11	FALSE	FALSE
Early	M	M_M1R	M	1	R	1	0.1	0.1	-1	1.25974	24.9897	-6.4	1.25974	24.9897	6.4				0	0	FALSE	FALSE
Early	M	M_M1T	M	1	T	2	0.0583	0.065	-1	-0.102158	-30.0921	-2.6	0.102158	30.0921	2.6				0	0	FALSE	FALSE
Early	M	M_M1V	M	1	V	1	0.045	0.045	1	0.233634	-32.065	2.3	0.233634	32.065	2.3				1	0	FALSE	FALSE
Early	M	M_N207D	N	207	D	1	0.0566	0.0566	1	-0.995698	0.9848	0	0.995698	0.9848	0				62	0	FALSE	FALSE
Early	M	M_N207H	N	207	H	3	0.0443	0.053	1	0.0871742	23.0367	0.3	0.0871742	23.0367	0.3				19	1	FALSE	FALSE
Early	M	M_N207Y	N	207	Y	2	0.06745	0.0755	-2	-0.000999001	49.0706	2.2	0.000999001	49.0706	2.2				21	0	FALSE	FALSE
Early	M	M_N216C	N	216	C	10	0.0575	0.0714	-3	-0.00990099	-10.9597	6	0.00990099	10.9597	6				0	0	FALSE	FALSE
Early	M	M_N216S	N	216	S	1	0.1068	0.1068	1	-0.299955	-27.0253	2.7	0.299955	27.0253	2.7				19	0	FALSE	FALSE
Early	M	M_N21F	N	21	F	4	0.0467	0.2167	-3	0	33.0712	6.3	0	33.0712	6.3				0	0	FALSE	FALSE
Early	M	M_N21I	N	21	I	1	0.0328	0.0328	-3	0	-0.945	8	0	0.945	8				2	0	FALSE	FALSE
Early	M	M_N21S	N	21	S	2	0.05385	0.0581	1	-0.299955	-27.0253	2.7	0.299955	27.0253	2.7				10	0	FALSE	FALSE
Early	M	M_N41A	N	41	A	1	0.0593	0.0593	-2	0.035773	-43.0247	5.3	0.035773	43.0247	5.3				1	0	FALSE	FALSE
Early	M	M_N41D	N	41	D	1	0.0561	0.0561	1	-0.995698	0.9848	0	0.995698	0.9848	0				2	0	FALSE	FALSE
Early	M	M_N41I	N	41	I	2	0.07555	0.1085	-3	0	-0.945	8	0	0.945	8				1	0	FALSE	FALSE
Early	M	M_N41K	N	41	K	1	0.0674	0.0674	0	0.999001	14.0697	-0.4	0.999001	14.0697	0.4				5	0	FALSE	FALSE
Early	M	M_N41R	N	41	R	1	0.041	0.041	0	0.99999	42.0831	-1	0.99999	42.0831	1				0	0	FALSE	FALSE
Early	M	M_N41S	N	41	S	1	0.0714	0.0714	1	-0.299955	-27.0253	2.7	0.299955	27.0253	2.7				90	1	FALSE	FALSE
Early	M	M_N41T	N	41	T	1	0.1622	0.1622	0	-0.361905	-12.9987	2.8	0.361905	12.9987	2.8				13	2	FALSE	FALSE
Early	M	M_N41Y	N	41	Y	2	0.0345	0.0377	-2	-0.000999001	49.0706	2.2	0.000999001	49.0706	2.2				8	0	FALSE	FALSE
Early	M	M_N5D	N	5	D	2	0.0315	0.0315	1	-0.995698	0.9848	0	0.995698	0.9848	0				37	0	FALSE	FALSE
Early	M	M_N5S	N	5	S	1	0.0348	0.0348	1	-0.299955	-27.0253	2.7	0.299955	27.0253	2.7				68	0	FALSE	FALSE
Early	M	M_P114S	P	114	S	1	0.0305	0.0305	-1	-0.498382	-10.0379	0.8	0.498382	10.0379	0.8				52	0	FALSE	FALSE
Early	M	M_P59A	P	59	A	2	0.0423	0.0471	-1	-0.162654	-26.0373	3.4	0.162654	26.0373	3.4				3	0	FALSE	FALSE
Early	M	M_P59L	P	59	L	2	0.0442	0.0515	-3	-0.198427	16.0424	5.4	0.198427	16.0424	5.4				2	0	FALSE	FALSE
Early	M	M_P59R	P	59	R	1	0.0314	0.0314	-2	0.801563	59.0705	-2.9	0.801563	59.0705	2.9				11	0	FALSE	FALSE
Early	M	M_P59S	P	59	S	2	0.04495	0.0582	-1	-0.498382	-10.0379	0.8	0.498382	10.0379	0.8				19	0	FALSE	FALSE
Early	M	M_Q19E	Q	19	E	1	0.0448	0.0448	2	-0.918037	0.9848	0	0.918037	0.9848	0				3833437	8	TRUE	TRUE
Early	M	M_Q19H	Q	19	H	4	0.0437	0.0877	0	0.0871742	9.0101	0.3	0.0871742	9.0101	0.3				139	1	FALSE	FALSE
Early	M	M_Q36H	Q	36	H	1	0.0429	0.0429	0	0.0871742	9.0101	0.3	0.0871742	9.0101	0.3				8	0	FALSE	FALSE
Early	M	M_R105C	R	105	C	1	0.0544	0.0544	-3	-1.00989	-53.0428	7	1.00989	53.0428	7				26	0	FALSE	FALSE
Early	M	M_R107S	R	107	S	1	0.0324	0.0324	-1	-1.29995	-69.1084	3.7	1.29995	69.1084	3.7				28	0	FALSE	FALSE
Early	M	M_R146C	R	146	C	1	0.0367	0.0367	-3	-1.00989	-53.0428	7	1.00989	53.0428	7				102	0	FALSE	FALSE
Early	M	M_R146L	R	146	L	1	0.0351	0.0351	-2	-0.99999	-43.0281	8.3	0.99999	43.0281	8.3				180	1	FALSE	FALSE
Early	M	M_R158C	R	158	C	3	0.9969	0.9971	-3	-1.00989	-53.0428	7	1.00989	53.0428	7				385	18	FALSE	FALSE
Early	M	M_R158G	R	158	G	1	0.0334	0.0334	-2	-0.99999	-99.1344	4.1	0.99999	99.1344	4.1				2	0	FALSE	FALSE
Early	M	M_R198C	R	198	C	1	0.0306	0.0306	-3	-1.00989	-53.0428	7	1.00989	53.0428	7				10	0	FALSE	FALSE
Early	M	M_R198D	R	198	D	1	0.0727	0.0727	-2	-1.99569	-41.0983	1	1.99569	41.0983	1				0	0	FALSE	FALSE
Early	M	M_R198L	R	198	L	1	0.0635	0.0635	-2	-0.99999	-43.0281	8.3	0.99999	43.0281	8.3				125	1	FALSE	FALSE
Early	M	M_R200M	R	200	M	1	0.0491	0.0491	-1	-1.25974	-24.9897	6.4	1.25974	24.9897	6.4				6	0	FALSE	FALSE
Early	M	M_R42C	R	42	C	1	0.0625	0.0625	-3	-1.00989	-53.0428	7	1.00989	53.0428	7				0	0	FALSE	FALSE
Early	M	M_R42G	R	42	G	2	0.08615	0.1019	-2	-0.99999	-99.1344	4.1	0.99999	99.1344	4.1				8	0	FALSE	FALSE
Early	M	M_R42I	R	42	I	1	0.0395	0.0395	-3	-0.99999	-43.0281	9	0.99999	43.0281	9				0	0	FALSE	FALSE
Early	M	M_R42M	R	42	M	1	0.0428	0.0428	-1	-1.25974	-24.9897	6.4	1.25974	24.9897	6.4				20	1	FALSE	FALSE
Early	M	M_R42S	R	42	S	1	0.1546	0.1546	-1	-1.29995	-69.1084	3.7	1.29995	69.1084	3.7				11	0	FALSE	FALSE
Early	M	M_R42T	R	42	T	1	0.0526	0.0526	-1	-1.3619	-55.0818	3.8	1.3619	55.0818	3.8				6	0	FALSE	FALSE
Early	M	M_R42W	R	42	W	1	0.0592	0.0592	-3	-0.99999	30.0242	3.6	0.99999	30.0242	3.6				1	0	FALSE	FALSE
Early	M	M_R44G	R	44	G	1	0.0588	0.0588	-2	-0.99999	-99.1344	4.1	0.99999	99.1344	4.1				12	0	FALSE	FALSE
Early	M	M_R44S	R	44	S	3	0.0507	0.0684	-1	-1.29995	-69.1084	3.7	1.29995	69.1084	3.7				412	0	FALSE	FALSE
Early	M	M_S108T	S	108	T	1	0.0401	0.0401	1	-0.0619499	14.0266	0.1	0.0619499	14.0266	0.1				39	0	FALSE	FALSE
Early	M	M_S173K	S	173	K	5	0.0354	0.0425	0	1.29896	41.095	-3.1	1.29896	41.095	3.1				931	0	FALSE	FALSE
Early	M	M_S177A	S	177	A	1	0.1086	0.1086	1	0.335728	-15.9994	2.6	0.335728	15.9994	2.6				33	0	FALSE	FALSE
Early	M	M_S177H	S	177	H	1	0.0355	0.0355	-1	0.387129	50.062	-2.4	0.387129	50.062	2.4				1	0	FALSE	FALSE
Early	M	M_S177N	S	177	N	1	0.0418	0.0418	1	0.299955	27.0253	-2.7	0.299955	27.0253	2.7				1	0	FALSE	FALSE
Early	M	M_S177P	S	177	P	2	0.09345	0.1461	-1	0.498382	10.0379	-0.8	0.498382	10.0379	0.8				1	0	FALSE	FALSE
Early	M	M_S177R	S	177	R	1	0.0772	0.0772	-1	1.29995	69.1084	-3.7	1.29995	69.1084	3.7				0	0	FALSE	FALSE
Early	M	M_S177T	S	177	T	1	0.1128	0.1128	1	-0.0619499	14.0266	0.1	0.0619499	14.0266	0.1				7	0	FALSE	FALSE
Early	M	M_S177Y	S	177	Y	1	0.0355	0.0355	-2	0.298956	76.0959	-0.5	0.298956	76.0959	0.5				5	0	FALSE	FALSE
Early	M	M_S191E	S	191	E	1	0.0777	0.0777	0	-0.618082	42.0367	-2.7	0.618082	42.0367	2.7				1	0	FALSE	FALSE
Early	M	M_S212C	S	212	C	10	0.08175	0.1067	-1	0.290054	16.0656	3.3	0.290054	16.0656	3.3				93	0	FALSE	FALSE
Early	M	M_S212G	S	212	G	1	0.0381	0.0381	0	0.299955	-30.026	0.4	0.299955	30.026	0.4				7276	0	FALSE	FALSE
Early	M	M_S4F	S	4	F	3	0.0571	0.5644	-2	0.299955	60.0965	3.6	0.299955	60.0965	3.6				2788	9	FALSE	FALSE
Early	M	M_S94I	S	94	I	1	0.0428	0.0428	-2	0.299955	26.0803	5.3	0.299955	26.0803	5.3				294	4	FALSE	FALSE
Early	M	M_S99F	S	99	F	1	0.0541	0.0541	-2	0.299955	60.0965	3.6	0.299955	60.0965	3.6				19	1	FALSE	FALSE
Early	M	M_T106M	T	106	M	1	0.0963	0.0963	-1	0.102158	30.0921	2.6	0.102158	30.0921	2.6				12	1	FALSE	FALSE
Early	M	M_T116I	T	116	I	1	0.0371	0.0371	-1	0.361905	12.0537	5.2	0.361905	12.0537	5.2				10	0	FALSE	FALSE
Early	M	M_T130S	T	130	S	1	0.0305	0.0305	1	0.0619499	-14.0266	-0.1	0.0619499	14.0266	0.1				35	0	FALSE	FALSE
Early	M	M_T169S	T	169	S	8	0.0502	0.076	1	0.0619499	-14.0266	-0.1	0.0619499	14.0266	0.1				11	0	FALSE	FALSE
Early	M	M_T172L	T	172	L	3	0.0422	0.0508	-1	0.361905	12.0537	4.5	0.361905	12.0537	4.5				1	0	FALSE	FALSE
Early	M	M_T172R	T	172	R	32	0.1083	0.2447	-1	1.3619	55.0818	-3.8	1.3619	55.0818	3.8				12	0	FALSE	FALSE
Early	M	M_T175M	T	175	M	15	0.2761	1	-1	0.102158	30.0921	2.6	0.102158	30.0921	2.6				1237	1023	FALSE	FALSE
Early	M	M_T208L	T	208	L	1	0.0485	0.0485	-1	0.361905	12.0537	4.5	0.361905	12.0537	4.5				1	0	FALSE	FALSE
Early	M	M_T208P	T	208	P	1	0.0311	0.0311	-1	0.560332	-3.9887	-0.9	0.560332	3.9887	0.9				28	0	FALSE	FALSE
Early	M	M_T30R	T	30	R	1	0.0352	0.0352	-1	1.3619	55.0818	-3.8	1.3619	55.0818	3.8				1	0	FALSE	FALSE
Early	M	M_T61I	T	61	I	1	0.0345	0.0345	-1	0.361905	12.0537	5.2	0.361905	12.0537	5.2				9	0	FALSE	FALSE
Early	M	M_T7I	T	7	I	5	0.0727	0.1613	-1	0.361905	12.0537	5.2	0.361905	12.0537	5.2				1446	6	FALSE	FALSE
Early	M	M_T7N	T	7	N	9	0.0395	0.0487	0	0.361905	12.9987	-2.8	0.361905	12.9987	2.8				118	0	FALSE	FALSE
Early	M	M_T9A	T	9	A	1	0.0439	0.0439	0	0.397678	-30.026	2.5	0.397678	30.026	2.5				202	0	FALSE	FALSE
Early	M	M_V122G	V	122	G	1	0.1543	0.1543	-3	0.0261132	-42.0797	-4.6	0.0261132	42.0797	4.6				1	0	FALSE	FALSE
Early	M	M_V139L	V	139	L	1	0.0896	0.0896	1	0.0261132	14.0266	-0.4	0.0261132	14.0266	0.4				155	1	FALSE	FALSE
Early	M	M_V170F	V	170	F	8	0.05545	0.07	-1	0.0261132	48.0428	-1.4	0.0261132	48.0428	1.4				4	0	FALSE	FALSE
Early	M	M_V170L	V	170	L	14	0.1145	0.193	1	0.0261132	14.0266	-0.4	0.0261132	14.0266	0.4				65	0	FALSE	FALSE
Early	M	M_V221L	V	221	L	1	0.0492	0.0492	1	0.0261132	14.0266	-0.4	0.0261132	14.0266	0.4				66	0	FALSE	FALSE
Early	M	M_V23E	V	23	E	1	0.0339	0.0339	-2	-0.891923	29.983	-7.7	0.891923	29.983	7.7				0	0	FALSE	FALSE
Early	M	M_V23L	V	23	L	1	0.0308	0.0308	1	0.0261132	14.0266	-0.4	0.0261132	14.0266	0.4				3343	16	FALSE	FALSE
Early	M	M_V88E	V	88	E	1	0.0334	0.0334	-2	-0.891923	29.983	-7.7	0.891923	29.983	7.7				0	0	FALSE	FALSE
Early	M	M_V88L	V	88	L	1	0.0963	0.0963	1	0.0261132	14.0266	-0.4	0.0261132	14.0266	0.4				303	1	FALSE	FALSE
Early	M	M_W31C	W	31	C	1	0.1526	0.1526	-2	-0.00990099	-83.067	3.4	0.00990099	83.067	3.4				250	7	FALSE	FALSE
Early	M	M_W31R	W	31	R	1	0.0369	0.0369	-3	0.99999	-30.0242	-3.6	0.99999	30.0242	3.6				6	0	FALSE	FALSE
Early	M	M_W58R	W	58	R	2	0.1657	0.1657	-3	0.99999	-30.0242	-3.6	0.99999	30.0242	3.6				6	0	FALSE	FALSE
Early	M	M_W75E	W	75	E	1	0.0303	0.0303	-3	-0.918037	-57.0959	-2.6	0.918037	57.0959	2.6				1	0	FALSE	FALSE
Early	M	M_W75G	W	75	G	1	0.05	0.05	-2	0	-129.159	0.5	0	129.159	0.5				22	0	FALSE	FALSE
Early	M	M_W75L	W	75	L	1	0.1221	0.1221	-2	0	-73.0523	4.7	0	73.0523	4.7				1060	8	FALSE	FALSE
Early	M	M_W75R	W	75	R	1	0.0398	0.0398	-3	0.99999	-30.0242	-3.6	0.99999	30.0242	3.6				83	0	FALSE	FALSE
Early	M	M_Y179H	Y	179	H	2	0.04715	0.0529	2	0.0881732	-26.0339	-1.9	0.0881732	26.0339	1.9				7	0	FALSE	FALSE
Early	M	M_Y199N	Y	199	N	1	0.0597	0.0597	-2	0.000999001	-49.0706	-2.2	0.000999001	49.0706	2.2				1	0	FALSE	FALSE
Early	M	M_Y204C	Y	204	C	1	0.0345	0.0345	-2	-0.00890199	-60.0303	3.8	0.00890199	60.0303	3.8				3	0	FALSE	FALSE
Early	M	M_Y47C	Y	47	C	1	0.0476	0.0476	-2	-0.00890199	-60.0303	3.8	0.00890199	60.0303	3.8				5	0	FALSE	FALSE
Early	M	M_Y71H	Y	71	H	1	0.033	0.033	2	0.0881732	-26.0339	-1.9	0.0881732	26.0339	1.9				661	0	FALSE	FALSE
Early	N	N_A12G	A	12	G	1	0.0541	0.0541	0	-0.035773	-14.0266	-2.2	0.035773	14.0266	2.2				5002	2	FALSE	FALSE
Early	N	N_A134V	A	134	V	1	0.0876	0.0876	0	-0.0618862	28.0531	2.4	0.0618862	28.0531	2.4				6268	5	FALSE	FALSE
Early	N	N_A156S	A	156	S	5	0.9852	0.9964	1	-0.335728	15.9994	-2.6	0.335728	15.9994	2.6				5786	55	FALSE	FALSE
Early	N	N_A182S	A	182	S	2	0.04475	0.0573	1	-0.335728	15.9994	-2.6	0.335728	15.9994	2.6				5322	9	FALSE	FALSE
Early	N	N_A208D	A	208	D	1	0.0371	0.0371	-2	-1.03147	44.0095	-5.3	1.03147	44.0095	5.3				93	0	FALSE	FALSE
Early	N	N_A208P	A	208	P	1	0.0979	0.0979	-1	0.162654	26.0373	-3.4	0.162654	26.0373	3.4				121	0	FALSE	FALSE
Early	N	N_A211D	A	211	D	1	0.0379	0.0379	-2	-1.03147	44.0095	-5.3	1.03147	44.0095	5.3				238	0	FALSE	FALSE
Early	N	N_A211P	A	211	P	1	0.0307	0.0307	-1	0.162654	26.0373	-3.4	0.162654	26.0373	3.4				56	0	FALSE	FALSE
Early	N	N_A211S	A	211	S	1	1	1	1	-0.335728	15.9994	-2.6	0.335728	15.9994	2.6				5714	10	FALSE	FALSE
Early	N	N_A211T	A	211	T	1	0.0544	0.0544	0	-0.397678	30.026	-2.5	0.397678	30.026	2.5				2093	0	FALSE	FALSE
Early	N	N_A217P	A	217	P	1	0.0492	0.0492	-1	0.162654	26.0373	-3.4	0.162654	26.0373	3.4				97	0	FALSE	FALSE
Early	N	N_A220S	A	220	S	2	0.03955	0.049	1	-0.335728	15.9994	-2.6	0.335728	15.9994	2.6				458	0	FALSE	FALSE
Early	N	N_A251F	A	251	F	1	0.0335	0.0335	-2	-0.035773	76.0959	1	0.035773	76.0959	1				30	0	FALSE	FALSE
Early	N	N_A251T	A	251	T	1	0.0641	0.0641	0	-0.397678	30.026	-2.5	0.397678	30.026	2.5				52	0	FALSE	FALSE
Early	N	N_A252S	A	252	S	4	0.51415	0.9957	1	-0.335728	15.9994	-2.6	0.335728	15.9994	2.6				2585	4	FALSE	FALSE
Early	N	N_A252T	A	252	T	7	0.0603	0.0874	0	-0.397678	30.026	-2.5	0.397678	30.026	2.5				251	1	FALSE	FALSE
Early	N	N_A254D	A	254	D	1	0.081	0.081	-2	-1.03147	44.0095	-5.3	1.03147	44.0095	5.3				9	0	FALSE	FALSE
Early	N	N_A254G	A	254	G	1	0.0631	0.0631	0	-0.035773	-14.0266	-2.2	0.035773	14.0266	2.2				4	0	FALSE	FALSE
Early	N	N_A254P	A	254	P	1	0.0795	0.0795	-1	0.162654	26.0373	-3.4	0.162654	26.0373	3.4				9	0	FALSE	FALSE
Early	N	N_A254S	A	254	S	2	0.13845	0.2071	1	-0.335728	15.9994	-2.6	0.335728	15.9994	2.6				438	2	FALSE	FALSE
Early	N	N_A254T	A	254	T	2	0.1147	0.1801	0	-0.397678	30.026	-2.5	0.397678	30.026	2.5				116	0	FALSE	FALSE
Early	N	N_A254V	A	254	V	28	0.0746	0.339	0	-0.0618862	28.0531	2.4	0.0618862	28.0531	2.4				210	1	FALSE	FALSE
Early	N	N_A264P	A	264	P	1	0.1119	0.1119	-1	0.162654	26.0373	-3.4	0.162654	26.0373	3.4				107	0	FALSE	FALSE
Early	N	N_A264V	A	264	V	1	0.0646	0.0646	0	-0.0618862	28.0531	2.4	0.0618862	28.0531	2.4				22	0	FALSE	FALSE
Early	N	N_A267S	A	267	S	1	0.0379	0.0379	1	-0.335728	15.9994	-2.6	0.335728	15.9994	2.6				1518	2	FALSE	FALSE
Early	N	N_A273V	A	273	V	1	0.1037	0.1037	0	-0.0618862	28.0531	2.4	0.0618862	28.0531	2.4				27	0	FALSE	FALSE
Early	N	N_A305T	A	305	T	1	0.1782	0.1782	0	-0.397678	30.026	-2.5	0.397678	30.026	2.5				1	0	FALSE	FALSE
Early	N	N_A305V	A	305	V	6	0.05995	0.1071	0	-0.0618862	28.0531	2.4	0.0618862	28.0531	2.4				71	0	FALSE	FALSE
Early	N	N_A308V	A	308	V	1	0.0698	0.0698	0	-0.0618862	28.0531	2.4	0.0618862	28.0531	2.4				9	0	FALSE	FALSE
Early	N	N_A311V	A	311	V	2	0.0422	0.0489	0	-0.0618862	28.0531	2.4	0.0618862	28.0531	2.4				249	6	FALSE	FALSE
Early	N	N_A336D	A	336	D	1	0.0307	0.0307	-2	-1.03147	44.0095	-5.3	1.03147	44.0095	5.3				5	0	FALSE	FALSE
Early	N	N_A336S	A	336	S	1	0.1288	0.1288	1	-0.335728	15.9994	-2.6	0.335728	15.9994	2.6				449	0	FALSE	FALSE
Early	N	N_A336V	A	336	V	1	0.0538	0.0538	0	-0.0618862	28.0531	2.4	0.0618862	28.0531	2.4				1631	3	FALSE	FALSE
Early	N	N_A359S	A	359	S	1	0.0312	0.0312	1	-0.335728	15.9994	-2.6	0.335728	15.9994	2.6				4231	11	FALSE	FALSE
Early	N	N_A381S	A	381	S	1	0.072	0.072	1	-0.335728	15.9994	-2.6	0.335728	15.9994	2.6				1100	5	FALSE	FALSE
Early	N	N_A397V	A	397	V	1	0.0511	0.0511	0	-0.0618862	28.0531	2.4	0.0618862	28.0531	2.4				347	10	FALSE	FALSE
Early	N	N_A398V	A	398	V	1	0.5114	0.5114	0	-0.0618862	28.0531	2.4	0.0618862	28.0531	2.4				14215	13	FALSE	FALSE
Early	N	N_A414D	A	414	D	1	0.0327	0.0327	-2	-1.03147	44.0095	-5.3	1.03147	44.0095	5.3				26	0	FALSE	FALSE
Early	N	N_A414T	A	414	T	4	0.04625	0.0674	0	-0.397678	30.026	-2.5	0.397678	30.026	2.5				308	0	FALSE	FALSE
Early	N	N_A55S	A	55	S	1	0.0311	0.0311	1	-0.335728	15.9994	-2.6	0.335728	15.9994	2.6				2775	3	FALSE	FALSE
Early	N	N_A90D	A	90	D	2	0.0422	0.0422	-2	-1.03147	44.0095	-5.3	1.03147	44.0095	5.3				99	0	FALSE	FALSE
Early	N	N_A90P	A	90	P	1	0.0447	0.0447	-1	0.162654	26.0373	-3.4	0.162654	26.0373	3.4				3	0	FALSE	FALSE
Early	N	N_A90S	A	90	S	2	0.0679	0.0778	1	-0.335728	15.9994	-2.6	0.335728	15.9994	2.6				7276	14	FALSE	FALSE
Early	N	N_D128Y	D	128	Y	2	0.0667	0.093	-3	0.994699	48.0858	2.2	0.994699	48.0858	2.2				2741	21	FALSE	FALSE
Early	N	N_D144Y	D	144	Y	8	0.03455	0.0477	-3	0.994699	48.0858	2.2	0.994699	48.0858	2.2				3199	9	FALSE	FALSE
Early	N	N_D216V	D	216	V	1	0.0429	0.0429	-3	0.969585	-15.9564	7.7	0.969585	15.9564	7.7				5	0	FALSE	FALSE
Early	N	N_D225Y	D	225	Y	1	0.1964	0.1964	-3	0.994699	48.0858	2.2	0.994699	48.0858	2.2				23	0	FALSE	FALSE
Early	N	N_D297Y	D	297	Y	1	0.0476	0.0476	-3	0.994699	48.0858	2.2	0.994699	48.0858	2.2				844	4	FALSE	FALSE
Early	N	N_D340A	D	340	A	1	0.0425	0.0425	-2	1.03147	-44.0095	5.3	1.03147	44.0095	5.3				21	0	FALSE	FALSE
Early	N	N_D340E	D	340	E	1	0.0355	0.0355	2	0.0776616	14.0266	0	0.0776616	14.0266	0				60	0	FALSE	FALSE
Early	N	N_D340G	D	340	G	1	0.0301	0.0301	-1	0.995698	-58.0361	3.1	0.995698	58.0361	3.1				110	1	FALSE	FALSE
Early	N	N_D340H	D	340	H	1	0.0887	0.0887	-1	1.08287	22.0519	0.3	1.08287	22.0519	0.3				4	0	FALSE	FALSE
Early	N	N_D340Q	D	340	Q	1	0.0319	0.0319	0	0.995698	13.0418	0	0.995698	13.0418	0				0	0	FALSE	FALSE
Early	N	N_D341A	D	341	A	1	0.0323	0.0323	-2	1.03147	-44.0095	5.3	1.03147	44.0095	5.3				51	0	FALSE	FALSE
Early	N	N_D343Y	D	343	Y	1	0.0306	0.0306	-3	0.994699	48.0858	2.2	0.994699	48.0858	2.2				515	3	FALSE	FALSE
Early	N	N_D348E	D	348	E	1	0.0349	0.0349	2	0.0776616	14.0266	0	0.0776616	14.0266	0				49	0	FALSE	FALSE
Early	N	N_D371G	D	371	G	11	0.0412	0.0724	-1	0.995698	-58.0361	3.1	0.995698	58.0361	3.1				193	1	FALSE	FALSE
Early	N	N_D377V	D	377	V	1	0.0446	0.0446	-3	0.969585	-15.9564	7.7	0.969585	15.9564	7.7				690	0	FALSE	FALSE
Early	N	N_D3Y	D	3	Y	1	0.0403	0.0403	-3	0.994699	48.0858	2.2	0.994699	48.0858	2.2				2890	6	FALSE	FALSE
Early	N	N_D402G	D	402	G	1	0.174	0.174	-1	0.995698	-58.0361	3.1	0.995698	58.0361	3.1				381	0	FALSE	FALSE
Early	N	N_D415A	D	415	A	1	0.0346	0.0346	-2	1.03147	-44.0095	5.3	1.03147	44.0095	5.3				37	0	FALSE	FALSE
Early	N	N_D415N	D	415	N	4	0.04685	0.0533	1	0.995698	-0.9848	0	0.995698	0.9848	0				609	0	FALSE	FALSE
Early	N	N_D81E	D	81	E	1	0.0582	0.0582	2	0.0776616	14.0266	0	0.0776616	14.0266	0				15	1	FALSE	FALSE
Early	N	N_D81G	D	81	G	1	0.0621	0.0621	-1	0.995698	-58.0361	3.1	0.995698	58.0361	3.1				170	0	FALSE	FALSE
Early	N	N_D98F	D	98	F	3	0.037	0.0387	-3	0.995698	32.0864	6.3	0.995698	32.0864	6.3				0	0	FALSE	FALSE
Early	N	N_D98Y	D	98	Y	1	0.1302	0.1302	-3	0.994699	48.0858	2.2	0.994699	48.0858	2.2				58	0	FALSE	FALSE
Early	N	N_E136A	E	136	A	2	0.07645	0.0765	-1	0.95381	-58.0361	5.3	0.95381	58.0361	5.3				160	0	FALSE	FALSE
Early	N	N_E253L	E	253	L	1	0.0637	0.0637	-3	0.918037	-15.9564	7.3	0.918037	15.9564	7.3				7	0	FALSE	FALSE
Early	N	N_E253W	E	253	W	1	0.0325	0.0325	-3	0.918037	57.0959	2.6	0.918037	57.0959	2.6				0	0	FALSE	FALSE
Early	N	N_E280V	E	280	V	1	0.0324	0.0324	-2	0.891923	-29.983	7.7	0.891923	29.983	7.7				179	2	FALSE	FALSE
Early	N	N_E31D	E	31	D	1	0.0318	0.0318	2	-0.0776616	-14.0266	0	0.0776616	14.0266	0				62	0	FALSE	FALSE
Early	N	N_E323D	E	323	D	14	0.0641	0.2	2	-0.0776616	-14.0266	0	0.0776616	14.0266	0				93	0	FALSE	FALSE
Early	N	N_E323Q	E	323	Q	1	0.0451	0.0451	2	0.918037	-0.9848	0	0.918037	0.9848	0				29	0	FALSE	FALSE
Early	N	N_E367D	E	367	D	3	0.0344	0.0344	2	-0.0776616	-14.0266	0	0.0776616	14.0266	0				797	0	FALSE	FALSE
Early	N	N_E367Y	E	367	Y	8	0.0366	0.0547	-2	0.917038	34.0592	2.2	0.917038	34.0592	2.2				1	0	FALSE	FALSE
Early	N	N_E378D	E	378	D	1	0.0438	0.0438	2	-0.0776616	-14.0266	0	0.0776616	14.0266	0				718	0	FALSE	FALSE
Early	N	N_E378K	E	378	K	1	0.0516	0.0516	1	1.91704	-0.9417	-0.4	1.91704	0.9417	0.4				281	5	FALSE	FALSE
Early	N	N_F110L	F	110	L	4	0.0374	0.0455	0	0	-34.0162	1	0	34.0162	1				9	0	FALSE	FALSE
Early	N	N_F171L	F	171	L	1	0.0346	0.0346	0	0	-34.0162	1	0	34.0162	1				209	0	FALSE	FALSE
Early	N	N_F274S	F	274	S	1	0.0421	0.0421	-2	-0.299955	-60.0965	-3.6	0.299955	60.0965	3.6				6	0	FALSE	FALSE
Early	N	N_F286I	F	286	I	1	0.0394	0.0394	0	0	-34.0162	1.7	0	34.0162	1.7				0	0	FALSE	FALSE
Early	N	N_F286L	F	286	L	1	0.0606	0.0606	0	0	-34.0162	1	0	34.0162	1				22	0	FALSE	FALSE
Early	N	N_F307Y	F	307	Y	1	0.0616	0.0616	3	-0.000999001	15.9994	-4.1	0.000999001	15.9994	4.1				31	0	FALSE	FALSE
Early	N	N_F314L	F	314	L	1	0.1156	0.1156	0	0	-34.0162	1	0	34.0162	1				140	1	FALSE	FALSE
Early	N	N_F314S	F	314	S	2	0.04375	0.0444	-2	-0.299955	-60.0965	-3.6	0.299955	60.0965	3.6				2	0	FALSE	FALSE
Early	N	N_F363I	F	363	I	2	0.0366	0.0366	0	0	-34.0162	1.7	0	34.0162	1.7				97	0	FALSE	FALSE
Early	N	N_F363V	F	363	V	1	0.049	0.049	-1	-0.0261132	-48.0428	1.4	0.0261132	48.0428	1.4				36	1	FALSE	FALSE
Early	N	N_F363Y	F	363	Y	2	0.03865	0.0455	3	-0.000999001	15.9994	-4.1	0.000999001	15.9994	4.1				23	0	FALSE	FALSE
Early	N	N_F66V	F	66	V	3	0.0646	0.1168	-1	-0.0261132	-48.0428	1.4	0.0261132	48.0428	1.4				2	0	FALSE	FALSE
Early	N	N_G164A	G	164	A	1	0.0375	0.0375	0	0.035773	14.0266	2.2	0.035773	14.0266	2.2				34	0	FALSE	FALSE
Early	N	N_G170A	G	170	A	1	0.0526	0.0526	0	0.035773	14.0266	2.2	0.035773	14.0266	2.2				43	0	FALSE	FALSE
Early	N	N_G175E	G	175	E	1	0.0447	0.0447	-2	-0.918037	72.0627	-3.1	0.918037	72.0627	3.1				5	0	FALSE	FALSE
Early	N	N_G178A	G	178	A	1	0.1577	0.1577	0	0.035773	14.0266	2.2	0.035773	14.0266	2.2				30	0	FALSE	FALSE
Early	N	N_G178D	G	178	D	1	0.082	0.082	-1	-0.995698	58.0361	-3.1	0.995698	58.0361	3.1				770	0	FALSE	FALSE
Early	N	N_G178E	G	178	E	1	0.0617	0.0617	-2	-0.918037	72.0627	-3.1	0.918037	72.0627	3.1				1	0	FALSE	FALSE
Early	N	N_G178S	G	178	S	1	0.2248	0.2248	0	-0.299955	30.026	-0.4	0.299955	30.026	0.4				631	1	FALSE	FALSE
Early	N	N_G178V	G	178	V	1	0.1149	0.1149	-3	-0.0261132	42.0797	4.6	0.0261132	42.0797	4.6				932	0	FALSE	FALSE
Early	N	N_G179A	G	179	A	1	0.0599	0.0599	0	0.035773	14.0266	2.2	0.035773	14.0266	2.2				7	0	FALSE	FALSE
Early	N	N_G179C	G	179	C	1	0.0599	0.0599	-3	-0.00990099	46.0916	2.9	0.00990099	46.0916	2.9				521	10	FALSE	FALSE
Early	N	N_G179D	G	179	D	1	0.038	0.038	-1	-0.995698	58.0361	-3.1	0.995698	58.0361	3.1				596	0	FALSE	FALSE
Early	N	N_G179R	G	179	R	1	0.0699	0.0699	-2	0.99999	99.1344	-4.1	0.99999	99.1344	4.1				22	0	FALSE	FALSE
Early	N	N_G179S	G	179	S	2	0.0644	0.0978	0	-0.299955	30.026	-0.4	0.299955	30.026	0.4				2544	1	FALSE	FALSE
Early	N	N_G179T	G	179	T	1	0.0339	0.0339	-2	-0.361905	44.0526	-0.3	0.361905	44.0526	0.3				2	0	FALSE	FALSE
Early	N	N_G179V	G	179	V	1	0.0799	0.0799	-3	-0.0261132	42.0797	4.6	0.0261132	42.0797	4.6				986	0	FALSE	FALSE
Early	N	N_G204L	G	204	L	1	0.9948	0.9948	-4	0	56.1063	4.2	0	56.1063	4.2				3118	4	FALSE	FALSE
Early	N	N_G212N	G	212	N	1	0.0336	0.0336	0	0	57.0513	-3.1	0	57.0513	3.1				5	0	FALSE	FALSE
Early	N	N_G212W	G	212	W	1	0.0594	0.0594	-2	0	129.159	-0.5	0	129.159	0.5				1	0	FALSE	FALSE
Early	N	N_G214N	G	214	N	1	0.0405	0.0405	0	0	57.0513	-3.1	0	57.0513	3.1				0	0	FALSE	FALSE
Early	N	N_G215V	G	215	V	1	0.04	0.04	-3	-0.0261132	42.0797	4.6	0.0261132	42.0797	4.6				506	3	FALSE	FALSE
Early	N	N_G236C	G	236	C	1	0.0367	0.0367	-3	-0.00990099	46.0916	2.9	0.00990099	46.0916	2.9				901	5	FALSE	FALSE
Early	N	N_G236P	G	236	P	1	0.0364	0.0364	-2	0.198427	40.0639	-1.2	0.198427	40.0639	1.2				0	0	FALSE	FALSE
Early	N	N_G236R	G	236	R	2	0.0397	0.0473	-2	0.99999	99.1344	-4.1	0.99999	99.1344	4.1				24	0	FALSE	FALSE
Early	N	N_G236V	G	236	V	2	0.18645	0.3143	-3	-0.0261132	42.0797	4.6	0.0261132	42.0797	4.6				2051	4	FALSE	FALSE
Early	N	N_G236Y	G	236	Y	1	0.0323	0.0323	-3	-0.000999001	106.122	-0.9	0.000999001	106.122	0.9				1	0	FALSE	FALSE
Early	N	N_G238C	G	238	C	12	0.0729	0.1653	-3	-0.00990099	46.0916	2.9	0.00990099	46.0916	2.9				6931	25	FALSE	FALSE
Early	N	N_G238L	G	238	L	4	0.0564	0.1296	-4	0	56.1063	4.2	0	56.1063	4.2				1	0	FALSE	FALSE
Early	N	N_G238R	G	238	R	3	0.0688	0.3824	-2	0.99999	99.1344	-4.1	0.99999	99.1344	4.1				52	0	FALSE	FALSE
Early	N	N_G243C	G	243	C	2	0.0431	0.0488	-3	-0.00990099	46.0916	2.9	0.00990099	46.0916	2.9				6026	8	FALSE	FALSE
Early	N	N_G243S	G	243	S	1	0.0378	0.0378	0	-0.299955	30.026	-0.4	0.299955	30.026	0.4				1695	0	FALSE	FALSE
Early	N	N_G243V	G	243	V	1	0.0551	0.0551	-3	-0.0261132	42.0797	4.6	0.0261132	42.0797	4.6				697	0	FALSE	FALSE
Early	N	N_G25C	G	25	C	1	0.0702	0.0702	-3	-0.00990099	46.0916	2.9	0.00990099	46.0916	2.9				2134	1	FALSE	FALSE
Early	N	N_G278C	G	278	C	3	0.0386	0.0589	-3	-0.00990099	46.0916	2.9	0.00990099	46.0916	2.9				0	0	FALSE	FALSE
Early	N	N_G278V	G	278	V	1	0.037	0.037	-3	-0.0261132	42.0797	4.6	0.0261132	42.0797	4.6				1	0	FALSE	FALSE
Early	N	N_G284A	G	284	A	1	0.0319	0.0319	0	0.035773	14.0266	2.2	0.035773	14.0266	2.2				3	0	FALSE	FALSE
Early	N	N_G284C	G	284	C	1	0.0894	0.0894	-3	-0.00990099	46.0916	2.9	0.00990099	46.0916	2.9				0	0	FALSE	FALSE
Early	N	N_G284E	G	284	E	1	0.0461	0.0461	-2	-0.918037	72.0627	-3.1	0.918037	72.0627	3.1				19	0	FALSE	FALSE
Early	N	N_G284R	G	284	R	1	0.0682	0.0682	-2	0.99999	99.1344	-4.1	0.99999	99.1344	4.1				56	0	FALSE	FALSE
Early	N	N_G295K	G	295	K	1	0.0743	0.0743	-2	0.999001	71.121	-3.5	0.999001	71.121	3.5				0	0	FALSE	FALSE
Early	N	N_G30R	G	30	R	1	0.0926	0.0926	-2	0.99999	99.1344	-4.1	0.99999	99.1344	4.1				3452	172	FALSE	FALSE
Early	N	N_G316E	G	316	E	2	0.0562	0.0601	-2	-0.918037	72.0627	-3.1	0.918037	72.0627	3.1				13	1	FALSE	FALSE
Early	N	N_G321C	G	321	C	1	0.0324	0.0324	-3	-0.00990099	46.0916	2.9	0.00990099	46.0916	2.9				111	0	FALSE	FALSE
Early	N	N_G321D	G	321	D	1	0.0769	0.0769	-1	-0.995698	58.0361	-3.1	0.995698	58.0361	3.1				343	1	FALSE	FALSE
Early	N	N_G328R	G	328	R	1	0.0393	0.0393	-2	0.99999	99.1344	-4.1	0.99999	99.1344	4.1				115	0	FALSE	FALSE
Early	N	N_G335S	G	335	S	1	0.6801	0.6801	0	-0.299955	30.026	-0.4	0.299955	30.026	0.4				6	0	FALSE	FALSE
Early	N	N_G44S	G	44	S	1	0.034	0.034	0	-0.299955	30.026	-0.4	0.299955	30.026	0.4				80	0	FALSE	FALSE
Early	N	N_G44V	G	44	V	1	0.0498	0.0498	-3	-0.0261132	42.0797	4.6	0.0261132	42.0797	4.6				1230	0	FALSE	FALSE
Early	N	N_G5E	G	5	E	1	0.0777	0.0777	-2	-0.918037	72.0627	-3.1	0.918037	72.0627	3.1				1911	0	FALSE	FALSE
Early	N	N_G60S	G	60	S	1	0.0317	0.0317	0	-0.299955	30.026	-0.4	0.299955	30.026	0.4				271	0	FALSE	FALSE
Early	N	N_G60V	G	60	V	1	0.0343	0.0343	-3	-0.0261132	42.0797	4.6	0.0261132	42.0797	4.6				28	1	FALSE	FALSE
Early	N	N_G71C	G	71	C	1	0.039	0.039	-3	-0.00990099	46.0916	2.9	0.00990099	46.0916	2.9				9	0	FALSE	FALSE
Early	N	N_G85C	G	85	C	1	0.0587	0.0587	-3	-0.00990099	46.0916	2.9	0.00990099	46.0916	2.9				2	0	FALSE	FALSE
Early	N	N_G97A	G	97	A	4	0.0359	0.038	0	0.035773	14.0266	2.2	0.035773	14.0266	2.2				3	0	FALSE	FALSE
Early	N	N_G99V	G	99	V	1	0.0371	0.0371	-3	-0.0261132	42.0797	4.6	0.0261132	42.0797	4.6				10	0	FALSE	FALSE
Early	N	N_H145Q	H	145	Q	1	0.0342	0.0342	0	-0.0871742	-9.0101	-0.3	0.0871742	9.0101	0.3				346	0	FALSE	FALSE
Early	N	N_H145Y	H	145	Y	1	0.0336	0.0336	2	-0.0881732	26.0339	1.9	0.0881732	26.0339	1.9				8104	9	FALSE	FALSE
Early	N	N_H300L	H	300	L	2	0.03595	0.0372	-3	-0.0871742	-23.9817	7	0.0871742	23.9817	7				280	0	FALSE	FALSE
Early	N	N_H300P	H	300	P	2	0.0532	0.0717	-2	0.111253	-40.0241	1.6	0.111253	40.0241	1.6				21	0	FALSE	FALSE
Early	N	N_H300R	H	300	R	1	0.0326	0.0326	0	0.912816	19.0464	-1.3	0.912816	19.0464	1.3				702	0	FALSE	FALSE
Early	N	N_H356D	H	356	D	3	0.042	0.0423	-1	-1.08287	-22.0519	-0.3	1.08287	22.0519	0.3				0	0	FALSE	FALSE
Early	N	N_H59L	H	59	L	1	0.0446	0.0446	-3	-0.0871742	-23.9817	7	0.0871742	23.9817	7				2	0	FALSE	FALSE
Early	N	N_H59Q	H	59	Q	3	0.0406	0.0746	0	-0.0871742	-9.0101	-0.3	0.0871742	9.0101	0.3				12	0	FALSE	FALSE
Early	N	N_H59Y	H	59	Y	1	0.1531	0.1531	2	-0.0881732	26.0339	1.9	0.0881732	26.0339	1.9				56	0	FALSE	FALSE
Early	N	N_I146V	I	146	V	2	0.07345	0.1044	3	-0.0261132	-14.0266	-0.3	0.0261132	14.0266	0.3				36	0	FALSE	FALSE
Early	N	N_I157N	I	157	N	2	0.0488	0.0488	-3	0	0.945	-8	0	0.945	8				0	0	FALSE	FALSE
Early	N	N_I15F	I	15	F	2	0.03305	0.0331	0	0	34.0162	-1.7	0	34.0162	1.7				105	0	FALSE	FALSE
Early	N	N_I15L	I	15	L	2	0.06775	0.0678	2	0	0	-0.7	0	0	0.7				113	1	FALSE	FALSE
Early	N	N_I15N	I	15	N	2	0.06275	0.0628	-3	0	0.945	-8	0	0.945	8				4	0	FALSE	FALSE
Early	N	N_I15T	I	15	T	2	0.03305	0.0331	-1	-0.361905	-12.0537	-5.2	0.361905	12.0537	5.2				189	1	FALSE	FALSE
Early	N	N_I15Y	I	15	Y	2	0.0413	0.0413	-1	-0.000999001	50.0156	-5.8	0.000999001	50.0156	5.8				3	0	FALSE	FALSE
Early	N	N_I292T	I	292	T	1	0.0414	0.0414	-1	-0.361905	-12.0537	-5.2	0.361905	12.0537	5.2				5618	209	FALSE	FALSE
Early	N	N_I304F	I	304	F	1	0.0444	0.0444	0	0	34.0162	-1.7	0	34.0162	1.7				2	0	FALSE	FALSE
Early	N	N_I304L	I	304	L	1	0.0341	0.0341	2	0	0	-0.7	0	0	0.7				46	0	FALSE	FALSE
Early	N	N_I320F	I	320	F	1	0.0393	0.0393	0	0	34.0162	-1.7	0	34.0162	1.7				198	1	FALSE	FALSE
Early	N	N_I320N	I	320	N	1	0.0393	0.0393	-3	0	0.945	-8	0	0.945	8				6	0	FALSE	FALSE
Early	N	N_I337S	I	337	S	1	0.1875	0.1875	-2	-0.299955	-26.0803	-5.3	0.299955	26.0803	5.3				11	0	FALSE	FALSE
Early	N	N_I337T	I	337	T	2	0.13415	0.2087	-1	-0.361905	-12.0537	-5.2	0.361905	12.0537	5.2				44	0	FALSE	FALSE
Early	N	N_I74F	I	74	F	1	0.0314	0.0314	0	0	34.0162	-1.7	0	34.0162	1.7				4	0	FALSE	FALSE
Early	N	N_I84L	I	84	L	1	0.0371	0.0371	2	0	0	-0.7	0	0	0.7				26	0	FALSE	FALSE
Early	N	N_I84V	I	84	V	1	0.04	0.04	3	-0.0261132	-14.0266	-0.3	0.0261132	14.0266	0.3				590	0	FALSE	FALSE
Early	N	N_I94V	I	94	V	1	0.0351	0.0351	3	-0.0261132	-14.0266	-0.3	0.0261132	14.0266	0.3				432	0	FALSE	FALSE
Early	N	N_K102F	K	102	F	1	0.0333	0.0333	-3	-0.999001	19.0015	6.7	0.999001	19.0015	6.7				1	0	FALSE	FALSE
Early	N	N_K102T	K	102	T	1	0.0331	0.0331	-1	-1.36091	-27.0684	3.2	1.36091	27.0684	3.2				1	0	FALSE	FALSE
Early	N	N_K143R	K	143	R	1	0.0632	0.0632	2	0.000989001	28.0134	-0.6	0.000989001	28.0134	0.6				21	1	FALSE	FALSE
Early	N	N_K169N	K	169	N	17	0.1278	0.2465	0	-0.999001	-14.0697	0.4	0.999001	14.0697	0.4				38	0	FALSE	FALSE
Early	N	N_K169T	K	169	T	1	0.0485	0.0485	-1	-1.36091	-27.0684	3.2	1.36091	27.0684	3.2				19	0	FALSE	FALSE
Early	N	N_K237E	K	237	E	1	0.0353	0.0353	1	-1.91704	0.9417	0.4	1.91704	0.9417	0.4				26	0	FALSE	FALSE
Early	N	N_K237H	K	237	H	3	0.0596	0.3568	-1	-0.911827	8.967	0.7	0.911827	8.967	0.7				0	0	FALSE	FALSE
Early	N	N_K237N	K	237	N	4	0.0505	0.0777	0	-0.999001	-14.0697	0.4	0.999001	14.0697	0.4				198	0	FALSE	FALSE
Early	N	N_K237T	K	237	T	2	0.05215	0.0567	-1	-1.36091	-27.0684	3.2	1.36091	27.0684	3.2				9	1	FALSE	FALSE
Early	N	N_K237V	K	237	V	1	0.0582	0.0582	-2	-1.02511	-29.0413	8.1	1.02511	29.0413	8.1				0	0	FALSE	FALSE
Early	N	N_K248M	K	248	M	1	0.0609	0.0609	-1	-1.25875	3.0237	5.8	1.25875	3.0237	5.8				21	0	FALSE	FALSE
Early	N	N_K248N	K	248	N	5	0.0609	0.3063	0	-0.999001	-14.0697	0.4	0.999001	14.0697	0.4				438	5	FALSE	FALSE
Early	N	N_K248R	K	248	R	1	0.0457	0.0457	2	0.000989001	28.0134	-0.6	0.000989001	28.0134	0.6				362	0	FALSE	FALSE
Early	N	N_K248T	K	248	T	2	0.0391	0.0455	-1	-1.36091	-27.0684	3.2	1.36091	27.0684	3.2				5	0	FALSE	FALSE
Early	N	N_K249N	K	249	N	6	0.06315	0.2325	0	-0.999001	-14.0697	0.4	0.999001	14.0697	0.4				74	0	FALSE	FALSE
Early	N	N_K256N	K	256	N	3	0.0667	0.1321	0	-0.999001	-14.0697	0.4	0.999001	14.0697	0.4				430	0	FALSE	FALSE
Early	N	N_K256Q	K	256	Q	1	0.1186	0.1186	1	-0.999001	-0.0431	0.4	0.999001	0.0431	0.4				3	0	FALSE	FALSE
Early	N	N_K257I	K	257	I	1	0.1135	0.1135	-3	-0.999001	-15.0147	8.4	0.999001	15.0147	8.4				0	0	FALSE	FALSE
Early	N	N_K257N	K	257	N	1	0.1184	0.1184	0	-0.999001	-14.0697	0.4	0.999001	14.0697	0.4				6	0	FALSE	FALSE
Early	N	N_K266I	K	266	I	2	0.0559	0.0672	-3	-0.999001	-15.0147	8.4	0.999001	15.0147	8.4				22	0	FALSE	FALSE
Early	N	N_K338N	K	338	N	2	0.0434	0.0494	0	-0.999001	-14.0697	0.4	0.999001	14.0697	0.4				9	0	FALSE	FALSE
Early	N	N_K338Q	K	338	Q	1	0.0488	0.0488	1	-0.999001	-0.0431	0.4	0.999001	0.0431	0.4				52	0	FALSE	FALSE
Early	N	N_K338R	K	338	R	1	0.1225	0.1225	2	0.000989001	28.0134	-0.6	0.000989001	28.0134	0.6				92	0	FALSE	FALSE
Early	N	N_K338T	K	338	T	1	0.0311	0.0311	-1	-1.36091	-27.0684	3.2	1.36091	27.0684	3.2				6	0	FALSE	FALSE
Early	N	N_K355Q	K	355	Q	1	0.0304	0.0304	1	-0.999001	-0.0431	0.4	0.999001	0.0431	0.4				2	0	FALSE	FALSE
Early	N	N_K369I	K	369	I	16	0.05855	0.0948	-3	-0.999001	-15.0147	8.4	0.999001	15.0147	8.4				181	1	FALSE	FALSE
Early	N	N_K369N	K	369	N	2	0.04595	0.0461	0	-0.999001	-14.0697	0.4	0.999001	14.0697	0.4				322	0	FALSE	FALSE
Early	N	N_K370E	K	370	E	2	0.0392	0.0393	1	-1.91704	0.9417	0.4	1.91704	0.9417	0.4				135	0	FALSE	FALSE
Early	N	N_K370G	K	370	G	1	0.0418	0.0418	-2	-0.999001	-71.121	3.5	0.999001	71.121	3.5				19	0	FALSE	FALSE
Early	N	N_K370R	K	370	R	2	0.0378	0.0378	2	0.000989001	28.0134	-0.6	0.000989001	28.0134	0.6				749	4	FALSE	FALSE
Early	N	N_K374N	K	374	N	1	0.0575	0.0575	0	-0.999001	-14.0697	0.4	0.999001	14.0697	0.4				2095	3	FALSE	FALSE
Early	N	N_K375E	K	375	E	1	0.0379	0.0379	1	-1.91704	0.9417	0.4	1.91704	0.9417	0.4				215	19	FALSE	FALSE
Early	N	N_K375N	K	375	N	1	0.0407	0.0407	0	-0.999001	-14.0697	0.4	0.999001	14.0697	0.4				546	8	FALSE	FALSE
Early	N	N_K387N	K	387	N	1	0.0669	0.0669	0	-0.999001	-14.0697	0.4	0.999001	14.0697	0.4				540	0	FALSE	FALSE
Early	N	N_K387R	K	387	R	1	0.0398	0.0398	2	0.000989001	28.0134	-0.6	0.000989001	28.0134	0.6				2435	23	FALSE	FALSE
Early	N	N_K387T	K	387	T	1	0.0507	0.0507	-1	-1.36091	-27.0684	3.2	1.36091	27.0684	3.2				34	0	FALSE	FALSE
Early	N	N_K388E	K	388	E	1	0.0342	0.0342	1	-1.91704	0.9417	0.4	1.91704	0.9417	0.4				57	0	FALSE	FALSE
Early	N	N_K388H	K	388	H	1	0.0598	0.0598	-1	-0.911827	8.967	0.7	0.911827	8.967	0.7				0	0	FALSE	FALSE
Early	N	N_K38N	K	38	N	1	0.052	0.052	0	-0.999001	-14.0697	0.4	0.999001	14.0697	0.4				1163	0	FALSE	FALSE
Early	N	N_K61N	K	61	N	1	0.1024	0.1024	0	-0.999001	-14.0697	0.4	0.999001	14.0697	0.4				226	1	FALSE	FALSE
Early	N	N_K61T	K	61	T	1	0.0324	0.0324	-1	-1.36091	-27.0684	3.2	1.36091	27.0684	3.2				16	0	FALSE	FALSE
Early	N	N_K65N	K	65	N	1	0.0761	0.0761	0	-0.999001	-14.0697	0.4	0.999001	14.0697	0.4				217	0	FALSE	FALSE
Early	N	N_K65R	K	65	R	1	0.071	0.071	2	0.000989001	28.0134	-0.6	0.000989001	28.0134	0.6				520	1	FALSE	FALSE
Early	N	N_L121A	L	121	A	1	0.0556	0.0556	-1	0.035773	-42.0797	-2	0.035773	42.0797	2				0	0	FALSE	FALSE
Early	N	N_L121F	L	121	F	1	0.0558	0.0558	0	0	34.0162	-1	0	34.0162	1				64	0	FALSE	FALSE
Early	N	N_L159Q	L	159	Q	2	0.0688	0.0688	-2	0	14.9716	-7.3	0	14.9716	7.3				2	0	FALSE	FALSE
Early	N	N_L161F	L	161	F	1	0.0317	0.0317	0	0	34.0162	-1	0	34.0162	1				5620	5	FALSE	FALSE
Early	N	N_L161Q	L	161	Q	1	0.0325	0.0325	-2	0	14.9716	-7.3	0	14.9716	7.3				0	0	FALSE	FALSE
Early	N	N_L161R	L	161	R	1	0.0353	0.0353	-2	0.99999	43.0281	-8.3	0.99999	43.0281	8.3				3	0	FALSE	FALSE
Early	N	N_L161V	L	161	V	1	0.0308	0.0308	1	-0.0261132	-14.0266	0.4	0.0261132	14.0266	0.4				29	0	FALSE	FALSE
Early	N	N_L161Y	L	161	Y	3	0.0311	0.0363	-1	-0.000999001	50.0156	-5.1	0.000999001	50.0156	5.1				0	0	FALSE	FALSE
Early	N	N_L167R	L	167	R	16	0.1041	0.2083	-2	0.99999	43.0281	-8.3	0.99999	43.0281	8.3				5	0	FALSE	FALSE
Early	N	N_L221F	L	221	F	19	0.0372	0.0658	0	0	34.0162	-1	0	34.0162	1				1448	0	FALSE	FALSE
Early	N	N_L223M	L	223	M	1	0.0479	0.0479	2	-0.259747	18.0384	-1.9	0.259747	18.0384	1.9				62	0	FALSE	FALSE
Early	N	N_L230F	L	230	F	1	0.0531	0.0531	0	0	34.0162	-1	0	34.0162	1				6057	7	FALSE	FALSE
Early	N	N_L230M	L	230	M	1	0.0762	0.0762	2	-0.259747	18.0384	-1.9	0.259747	18.0384	1.9				0	0	FALSE	FALSE
Early	N	N_L339A	L	339	A	1	0.0808	0.0808	-1	0.035773	-42.0797	-2	0.035773	42.0797	2				0	0	FALSE	FALSE
Early	N	N_L339E	L	339	E	1	0.0613	0.0613	-3	-0.918037	15.9564	-7.3	0.918037	15.9564	7.3				0	0	FALSE	FALSE
Early	N	N_L339F	L	339	F	1	0.0326	0.0326	0	0	34.0162	-1	0	34.0162	1				354	1	FALSE	FALSE
Early	N	N_L339Q	L	339	Q	1	0.043	0.043	-2	0	14.9716	-7.3	0	14.9716	7.3				0	0	FALSE	FALSE
Early	N	N_L339S	L	339	S	1	0.0443	0.0443	-2	-0.299955	-26.0803	-4.6	0.299955	26.0803	4.6				3	1	FALSE	FALSE
Early	N	N_L339V	L	339	V	3	0.0523	0.0577	1	-0.0261132	-14.0266	0.4	0.0261132	14.0266	0.4				40	0	FALSE	FALSE
Early	N	N_L352T	L	352	T	1	0.0589	0.0589	-1	-0.361905	-12.0537	-4.5	0.361905	12.0537	4.5				3	0	FALSE	FALSE
Early	N	N_L394H	L	394	H	1	0.037	0.037	-3	0.0871742	23.9817	-7	0.0871742	23.9817	7				3	0	FALSE	FALSE
Early	N	N_L395Q	L	395	Q	1	0.0382	0.0382	-2	0	14.9716	-7.3	0	14.9716	7.3				0	0	FALSE	FALSE
Early	N	N_L395W	L	395	W	1	0.0365	0.0365	-2	0	73.0523	-4.7	0	73.0523	4.7				1	0	FALSE	FALSE
Early	N	N_L407V	L	407	V	1	0.0563	0.0563	1	-0.0261132	-14.0266	0.4	0.0261132	14.0266	0.4				0	0	FALSE	FALSE
Early	N	N_L45I	L	45	I	8	0.03365	0.0599	2	0	0	0.7	0	0	0.7				35	0	FALSE	FALSE
Early	N	N_L56P	L	56	P	4	0.04	0.0643	-3	0.198427	-16.0424	-5.4	0.198427	16.0424	5.4				4	0	FALSE	FALSE
Early	N	N_L56Q	L	56	Q	1	0.0808	0.0808	-2	0	14.9716	-7.3	0	14.9716	7.3				1	0	FALSE	FALSE
Early	N	N_L56T	L	56	T	1	0.2193	0.2193	-1	-0.361905	-12.0537	-4.5	0.361905	12.0537	4.5				0	0	FALSE	FALSE
Early	N	N_M101I	M	101	I	1	0.0482	0.0482	1	0.259747	-18.0384	2.6	0.259747	18.0384	2.6				1559	2	FALSE	FALSE
Early	N	N_M101R	M	101	R	1	0.0528	0.0528	-1	1.25974	24.9897	-6.4	1.25974	24.9897	6.4				4	0	FALSE	FALSE
Early	N	N_M1I	M	1	I	1	0.0348	0.0348	1	0.259747	-18.0384	2.6	0.259747	18.0384	2.6				2	0	FALSE	FALSE
Early	N	N_M1L	M	1	L	5	0.0431	0.0882	2	0.259747	-18.0384	1.9	0.259747	18.0384	1.9				83	0	FALSE	FALSE
Early	N	N_M1T	M	1	T	1	0.0644	0.0644	-1	-0.102158	-30.0921	-2.6	0.102158	30.0921	2.6				0	0	FALSE	FALSE
Early	N	N_M210I	M	210	I	2	0.5444	1	1	0.259747	-18.0384	2.6	0.259747	18.0384	2.6				8423	5	FALSE	FALSE
Early	N	N_M210L	M	210	L	1	0.033	0.033	2	0.259747	-18.0384	1.9	0.259747	18.0384	1.9				430	1	FALSE	FALSE
Early	N	N_M210T	M	210	T	1	0.0667	0.0667	-1	-0.102158	-30.0921	-2.6	0.102158	30.0921	2.6				1179	7	FALSE	FALSE
Early	N	N_M234I	M	234	I	1	0.0309	0.0309	1	0.259747	-18.0384	2.6	0.259747	18.0384	2.6				112183	67	TRUE	FALSE
Early	N	N_M317L	M	317	L	3	0.0401	0.0448	2	0.259747	-18.0384	1.9	0.259747	18.0384	1.9				192	0	FALSE	FALSE
Early	N	N_M317T	M	317	T	1	0.0399	0.0399	-1	-0.102158	-30.0921	-2.6	0.102158	30.0921	2.6				246	1	FALSE	FALSE
Early	N	N_M322K	M	322	K	1	0.0845	0.0845	-1	1.25875	-3.0237	-5.8	1.25875	3.0237	5.8				20	0	FALSE	FALSE
Early	N	N_M411L	M	411	L	1	0.0745	0.0745	2	0.259747	-18.0384	1.9	0.259747	18.0384	1.9				194	1	FALSE	FALSE
Early	N	N_N150Y	N	150	Y	2	0.0376	0.0444	-2	-0.000999001	49.0706	2.2	0.000999001	49.0706	2.2				9	0	FALSE	FALSE
Early	N	N_N192Y	N	192	Y	1	0.0332	0.0332	-2	-0.000999001	49.0706	2.2	0.000999001	49.0706	2.2				164	1	FALSE	FALSE
Early	N	N_N196I	N	196	I	1	0.0577	0.0577	-3	0	-0.945	8	0	0.945	8				457	0	FALSE	FALSE
Early	N	N_N213Y	N	213	Y	4	0.03515	0.0472	-2	-0.000999001	49.0706	2.2	0.000999001	49.0706	2.2				2350	6	FALSE	FALSE
Early	N	N_N269T	N	269	T	8	0.052	0.0707	0	-0.361905	-12.9987	2.8	0.361905	12.9987	2.8				137	0	FALSE	FALSE
Early	N	N_N27D	N	27	D	1	0.0357	0.0357	1	-0.995698	0.9848	0	0.995698	0.9848	0				301	1	FALSE	FALSE
Early	N	N_N27H	N	27	H	1	0.0386	0.0386	1	0.0871742	23.0367	0.3	0.0871742	23.0367	0.3				9	0	FALSE	FALSE
Early	N	N_N27K	N	27	K	1	0.0495	0.0495	0	0.999001	14.0697	-0.4	0.999001	14.0697	0.4				347	0	FALSE	FALSE
Early	N	N_N27R	N	27	R	1	0.0526	0.0526	0	0.99999	42.0831	-1	0.99999	42.0831	1				13	0	FALSE	FALSE
Early	N	N_N27S	N	27	S	1	0.0406	0.0406	1	-0.299955	-27.0253	2.7	0.299955	27.0253	2.7				168	0	FALSE	FALSE
Early	N	N_N27T	N	27	T	3	0.1895	0.1916	0	-0.361905	-12.9987	2.8	0.361905	12.9987	2.8				45	0	FALSE	FALSE
Early	N	N_N27Y	N	27	Y	1	0.0466	0.0466	-2	-0.000999001	49.0706	2.2	0.000999001	49.0706	2.2				173	1	FALSE	FALSE
Early	N	N_N285H	N	285	H	2	0.0305	0.0307	1	0.0871742	23.0367	0.3	0.0871742	23.0367	0.3				1	2	FALSE	FALSE
Early	N	N_N285Y	N	285	Y	1	0.2286	0.2286	-2	-0.000999001	49.0706	2.2	0.000999001	49.0706	2.2				1	0	FALSE	FALSE
Early	N	N_N29D	N	29	D	1	0.1536	0.1536	1	-0.995698	0.9848	0	0.995698	0.9848	0				594	0	FALSE	FALSE
Early	N	N_N47G	N	47	G	1	0.0377	0.0377	0	0	-57.0513	3.1	0	57.0513	3.1				1	0	FALSE	FALSE
Early	N	N_N47K	N	47	K	1	0.0602	0.0602	0	0.999001	14.0697	-0.4	0.999001	14.0697	0.4				0	0	FALSE	FALSE
Early	N	N_N48K	N	48	K	1	0.051	0.051	0	0.999001	14.0697	-0.4	0.999001	14.0697	0.4				7	0	FALSE	FALSE
Early	N	N_N48Y	N	48	Y	1	0.0509	0.0509	-2	-0.000999001	49.0706	2.2	0.000999001	49.0706	2.2				155	0	FALSE	FALSE
Early	N	N_N4D	N	4	D	1	0.0578	0.0578	1	-0.995698	0.9848	0	0.995698	0.9848	0				50	1	FALSE	FALSE
Early	N	N_N4F	N	4	F	2	0.05785	0.0791	-3	0	33.0712	6.3	0	33.0712	6.3				0	0	FALSE	FALSE
Early	N	N_N8T	N	8	T	1	0.0335	0.0335	0	-0.361905	-12.9987	2.8	0.361905	12.9987	2.8				352	1	FALSE	FALSE
Early	N	N_N8Y	N	8	Y	11	0.0432	0.1368	-2	-0.000999001	49.0706	2.2	0.000999001	49.0706	2.2				903	1	FALSE	FALSE
Early	N	N_P106R	P	106	R	1	0.0471	0.0471	-2	0.801563	59.0705	-2.9	0.801563	59.0705	2.9				1	0	FALSE	FALSE
Early	N	N_P117S	P	117	S	1	0.0485	0.0485	-1	-0.498382	-10.0379	0.8	0.498382	10.0379	0.8				25	1	FALSE	FALSE
Early	N	N_P13L	P	13	L	2	0.05045	0.0551	-3	-0.198427	16.0424	5.4	0.198427	16.0424	5.4				3950842	803	TRUE	TRUE
Early	N	N_P142A	P	142	A	1	0.049	0.049	-1	-0.162654	-26.0373	3.4	0.162654	26.0373	3.4				58	0	FALSE	FALSE
Early	N	N_P142L	P	142	L	1	0.0685	0.0685	-3	-0.198427	16.0424	5.4	0.198427	16.0424	5.4				478	1	FALSE	FALSE
Early	N	N_P142T	P	142	T	1	0.0346	0.0346	-1	-0.560332	3.9887	0.9	0.560332	3.9887	0.9				157	0	FALSE	FALSE
Early	N	N_P151S	P	151	S	1	0.0397	0.0397	-1	-0.498382	-10.0379	0.8	0.498382	10.0379	0.8				100060	2	TRUE	FALSE
Early	N	N_P162S	P	162	S	1	0.0341	0.0341	-1	-0.498382	-10.0379	0.8	0.498382	10.0379	0.8				1280	0	FALSE	FALSE
Early	N	N_P199S	P	199	S	1	0.9857	0.9857	-1	-0.498382	-10.0379	0.8	0.498382	10.0379	0.8				6378	32	FALSE	FALSE
Early	N	N_P207T	P	207	T	1	0.035	0.035	-1	-0.560332	3.9887	0.9	0.560332	3.9887	0.9				432	0	FALSE	FALSE
Early	N	N_P20T	P	20	T	1	0.0444	0.0444	-1	-0.560332	3.9887	0.9	0.560332	3.9887	0.9				134	0	FALSE	FALSE
Early	N	N_P258Q	P	258	Q	1	0.1201	0.1201	-1	-0.198427	31.014	-1.9	0.198427	31.014	1.9				0	0	FALSE	FALSE
Early	N	N_P302G	P	302	G	1	0.0345	0.0345	-2	-0.198427	-40.0639	1.2	0.198427	40.0639	1.2				1	0	FALSE	FALSE
Early	N	N_P302L	P	302	L	1	0.0313	0.0313	-3	-0.198427	16.0424	5.4	0.198427	16.0424	5.4				4	0	FALSE	FALSE
Early	N	N_P309A	P	309	A	1	0.067	0.067	-1	-0.162654	-26.0373	3.4	0.162654	26.0373	3.4				0	0	FALSE	FALSE
Early	N	N_P309S	P	309	S	1	0.1048	0.1048	-1	-0.498382	-10.0379	0.8	0.498382	10.0379	0.8				140	2	FALSE	FALSE
Early	N	N_P326R	P	326	R	1	0.0397	0.0397	-2	0.801563	59.0705	-2.9	0.801563	59.0705	2.9				175	0	FALSE	FALSE
Early	N	N_P344Q	P	344	Q	1	0.0752	0.0752	-1	-0.198427	31.014	-1.9	0.198427	31.014	1.9				192	0	FALSE	FALSE
Early	N	N_P344S	P	344	S	3	0.8257	0.9981	-1	-0.498382	-10.0379	0.8	0.498382	10.0379	0.8				1597	46	FALSE	FALSE
Early	N	N_P365Q	P	365	Q	2	0.03505	0.0374	-1	-0.198427	31.014	-1.9	0.198427	31.014	1.9				426	0	FALSE	FALSE
Early	N	N_P365S	P	365	S	17	0.1417	0.5353	-1	-0.498382	-10.0379	0.8	0.498382	10.0379	0.8				21777	9	FALSE	FALSE
Early	N	N_P368D	P	368	D	20	0.06425	0.2325	-1	-1.19413	17.9722	-1.9	1.19413	17.9722	1.9				0	0	FALSE	FALSE
Early	N	N_P383L	P	383	L	3	0.1241	0.1931	-3	-0.198427	16.0424	5.4	0.198427	16.0424	5.4				12098	42	FALSE	FALSE
Early	N	N_P396H	P	396	H	1	0.0368	0.0368	-2	-0.111253	40.0241	-1.6	0.111253	40.0241	1.6				29	1	FALSE	FALSE
Early	N	N_P46Y	P	46	Y	1	0.0332	0.0332	-3	-0.199426	66.058	0.3	0.199426	66.058	0.3				1	0	FALSE	FALSE
Early	N	N_P67L	P	67	L	1	0.1368	0.1368	-3	-0.198427	16.0424	5.4	0.198427	16.0424	5.4				3783	1	FALSE	FALSE
Early	N	N_P80L	P	80	L	1	0.0423	0.0423	-3	-0.198427	16.0424	5.4	0.198427	16.0424	5.4				581	12	FALSE	FALSE
Early	N	N_Q160H	Q	160	H	3	0.0529	0.0529	0	0.0871742	9.0101	0.3	0.0871742	9.0101	0.3				49	0	FALSE	FALSE
Early	N	N_Q160N	Q	160	N	1	0.0473	0.0473	0	0	-14.0266	0	0	14.0266	0				0	0	FALSE	FALSE
Early	N	N_Q239H	Q	239	H	22	0.1045	0.4431	0	0.0871742	9.0101	0.3	0.0871742	9.0101	0.3				440	0	FALSE	FALSE
Early	N	N_Q239S	Q	239	S	2	0.05265	0.0665	0	-0.299955	-41.0519	2.7	0.299955	41.0519	2.7				3	0	FALSE	FALSE
Early	N	N_Q240H	Q	240	H	2	0.049	0.0561	0	0.0871742	9.0101	0.3	0.0871742	9.0101	0.3				100	0	FALSE	FALSE
Early	N	N_Q241H	Q	241	H	1	0.1068	0.1068	0	0.0871742	9.0101	0.3	0.0871742	9.0101	0.3				178	0	FALSE	FALSE
Early	N	N_Q242G	Q	242	G	1	0.0619	0.0619	-2	0	-71.0779	3.1	0	71.0779	3.1				0	0	FALSE	FALSE
Early	N	N_Q242H	Q	242	H	2	0.0401	0.0432	0	0.0871742	9.0101	0.3	0.0871742	9.0101	0.3				352	0	FALSE	FALSE
Early	N	N_Q244K	Q	244	K	1	0.0318	0.0318	1	0.999001	0.0431	-0.4	0.999001	0.0431	0.4				477	0	FALSE	FALSE
Early	N	N_Q244R	Q	244	R	1	0.079	0.079	1	0.99999	28.0565	-1	0.99999	28.0565	1				230	1	FALSE	FALSE
Early	N	N_Q260K	Q	260	K	3	0.0588	0.1429	1	0.999001	0.0431	-0.4	0.999001	0.0431	0.4				109	0	FALSE	FALSE
Early	N	N_Q281I	Q	281	I	1	0.0353	0.0353	-3	0	-14.9716	8	0	14.9716	8				1	0	FALSE	FALSE
Early	N	N_Q281R	Q	281	R	2	0.0344	0.0374	1	0.99999	28.0565	-1	0.99999	28.0565	1				88	7	FALSE	FALSE
Early	N	N_Q283P	Q	283	P	1	0.1668	0.1668	-1	0.198427	-31.014	1.9	0.198427	31.014	1.9				46	0	FALSE	FALSE
Early	N	N_Q289G	Q	289	G	1	0.0483	0.0483	-2	0	-71.0779	3.1	0	71.0779	3.1				1	0	FALSE	FALSE
Early	N	N_Q28E	Q	28	E	1	0.0826	0.0826	2	-0.918037	0.9848	0	0.918037	0.9848	0				27	0	FALSE	FALSE
Early	N	N_Q28H	Q	28	H	1	0.062	0.062	0	0.0871742	9.0101	0.3	0.0871742	9.0101	0.3				1373	3	FALSE	FALSE
Early	N	N_Q28L	Q	28	L	1	0.1446	0.1446	-2	0	-14.9716	7.3	0	14.9716	7.3				27	5	FALSE	FALSE
Early	N	N_Q28R	Q	28	R	1	0.157	0.157	1	0.99999	28.0565	-1	0.99999	28.0565	1				969	6	FALSE	FALSE
Early	N	N_Q303H	Q	303	H	3	0.0462	0.1726	0	0.0871742	9.0101	0.3	0.0871742	9.0101	0.3				7	0	FALSE	FALSE
Early	N	N_Q303L	Q	303	L	1	0.0431	0.0431	-2	0	-14.9716	7.3	0	14.9716	7.3				149	0	FALSE	FALSE
Early	N	N_Q306L	Q	306	L	2	0.06665	0.0719	-2	0	-14.9716	7.3	0	14.9716	7.3				358	0	FALSE	FALSE
Early	N	N_Q306R	Q	306	R	2	0.0592	0.0809	1	0.99999	28.0565	-1	0.99999	28.0565	1				85	0	FALSE	FALSE
Early	N	N_Q380H	Q	380	H	1	0.0352	0.0352	0	0.0871742	9.0101	0.3	0.0871742	9.0101	0.3				641	2	FALSE	FALSE
Early	N	N_Q384H	Q	384	H	1	0.0421	0.0421	0	0.0871742	9.0101	0.3	0.0871742	9.0101	0.3				2137	5	FALSE	FALSE
Early	N	N_Q386H	Q	386	H	1	0.0378	0.0378	0	0.0871742	9.0101	0.3	0.0871742	9.0101	0.3				760	3	FALSE	FALSE
Early	N	N_Q389H	Q	389	H	1	0.0309	0.0309	0	0.0871742	9.0101	0.3	0.0871742	9.0101	0.3				6007	6	FALSE	FALSE
Early	N	N_Q390H	Q	390	H	6	0.0775	0.1387	0	0.0871742	9.0101	0.3	0.0871742	9.0101	0.3				246	1	FALSE	FALSE
Early	N	N_Q390P	Q	390	P	1	0.0418	0.0418	-1	0.198427	-31.014	1.9	0.198427	31.014	1.9				45	0	FALSE	FALSE
Early	N	N_Q408R	Q	408	R	1	0.0407	0.0407	1	0.99999	28.0565	-1	0.99999	28.0565	1				60	0	FALSE	FALSE
Early	N	N_Q418H	Q	418	H	1	0.0991	0.0991	0	0.0871742	9.0101	0.3	0.0871742	9.0101	0.3				11058	10	FALSE	FALSE
Early	N	N_Q418K	Q	418	K	1	0.0566	0.0566	1	0.999001	0.0431	-0.4	0.999001	0.0431	0.4				81	0	FALSE	FALSE
Early	N	N_Q43R	Q	43	R	1	0.0364	0.0364	1	0.99999	28.0565	-1	0.99999	28.0565	1				950	0	FALSE	FALSE
Early	N	N_Q58P	Q	58	P	1	0.0414	0.0414	-1	0.198427	-31.014	1.9	0.198427	31.014	1.9				0	0	FALSE	FALSE
Early	N	N_Q7H	Q	7	H	2	0.11785	0.118	0	0.0871742	9.0101	0.3	0.0871742	9.0101	0.3				351	2	FALSE	FALSE
Early	N	N_Q7K	Q	7	K	1	0.2086	0.2086	1	0.999001	0.0431	-0.4	0.999001	0.0431	0.4				5049	5	FALSE	FALSE
Early	N	N_Q83Y	Q	83	Y	1	0.0349	0.0349	-1	-0.000999001	35.044	2.2	0.000999001	35.044	2.2				0	0	FALSE	FALSE
Early	N	N_Q9H	Q	9	H	1	0.0834	0.0834	0	0.0871742	9.0101	0.3	0.0871742	9.0101	0.3				10601	12	FALSE	FALSE
Early	N	N_R107G	R	107	G	1	0.05	0.05	-2	-0.99999	-99.1344	4.1	0.99999	99.1344	4.1				12	0	FALSE	FALSE
Early	N	N_R107S	R	107	S	1	0.0662	0.0662	-1	-1.29995	-69.1084	3.7	1.29995	69.1084	3.7				2	0	FALSE	FALSE
Early	N	N_R149S	R	149	S	1	0.0634	0.0634	-1	-1.29995	-69.1084	3.7	1.29995	69.1084	3.7				0	0	FALSE	FALSE
Early	N	N_R14L	R	14	L	2	0.03595	0.036	-2	-0.99999	-43.0281	8.3	0.99999	43.0281	8.3				1142	4	FALSE	FALSE
Early	N	N_R14P	R	14	P	2	0.1233	0.1234	-2	-0.801563	-59.0705	2.9	0.801563	59.0705	2.9				46	0	FALSE	FALSE
Early	N	N_R191C	R	191	C	1	0.0425	0.0425	-3	-1.00989	-53.0428	7	1.00989	53.0428	7				245	11	FALSE	FALSE
Early	N	N_R191L	R	191	L	1	0.8013	0.8013	-2	-0.99999	-43.0281	8.3	0.99999	43.0281	8.3				684	34	FALSE	FALSE
Early	N	N_R203G	R	203	G	1	0.0719	0.0719	-2	-0.99999	-99.1344	4.1	0.99999	99.1344	4.1				52	0	FALSE	FALSE
Early	N	N_R209A	R	209	A	2	0.04945	0.0495	-1	-0.964217	-85.1078	6.3	0.964217	85.1078	6.3				7	0	FALSE	FALSE
Early	N	N_R209I	R	209	I	1	0.0351	0.0351	-3	-0.99999	-43.0281	9	0.99999	43.0281	9				6925	13	FALSE	FALSE
Early	N	N_R209K	R	209	K	1	0.0789	0.0789	2	-0.000989001	-28.0134	0.6	0.000989001	28.0134	0.6				1210	6	FALSE	FALSE
Early	N	N_R209N	R	209	N	2	0.0706	0.0969	0	-0.99999	-42.0831	1	0.99999	42.0831	1				3	0	FALSE	FALSE
Early	N	N_R209S	R	209	S	1	0.032	0.032	-1	-1.29995	-69.1084	3.7	1.29995	69.1084	3.7				308	0	FALSE	FALSE
Early	N	N_R259K	R	259	K	1	0.0435	0.0435	2	-0.000989001	-28.0134	0.6	0.000989001	28.0134	0.6				7	0	FALSE	FALSE
Early	N	N_R259Q	R	259	Q	3	0.0348	0.0394	1	-0.99999	-28.0565	1	0.99999	28.0565	1				75	3	FALSE	FALSE
Early	N	N_R277C	R	277	C	1	0.048	0.048	-3	-1.00989	-53.0428	7	1.00989	53.0428	7				3	0	FALSE	FALSE
Early	N	N_R277P	R	277	P	1	0.0837	0.0837	-2	-0.801563	-59.0705	2.9	0.801563	59.0705	2.9				2	0	FALSE	FALSE
Early	N	N_R293I	R	293	I	1	0.0897	0.0897	-3	-0.99999	-43.0281	9	0.99999	43.0281	9				32	0	FALSE	FALSE
Early	N	N_R319G	R	319	G	1	0.0598	0.0598	-2	-0.99999	-99.1344	4.1	0.99999	99.1344	4.1				2	0	FALSE	FALSE
Early	N	N_R319P	R	319	P	1	0.0456	0.0456	-2	-0.801563	-59.0705	2.9	0.801563	59.0705	2.9				0	0	FALSE	FALSE
Early	N	N_R32D	R	32	D	2	0.0623	0.0624	-2	-1.99569	-41.0983	1	1.99569	41.0983	1				0	0	FALSE	FALSE
Early	N	N_R32H	R	32	H	1	0.0504	0.0504	0	-0.912816	-19.0464	1.3	0.912816	19.0464	1.3				2119	71	FALSE	FALSE
Early	N	N_R32L	R	32	L	1	0.0403	0.0403	-2	-0.99999	-43.0281	8.3	0.99999	43.0281	8.3				191	5	FALSE	FALSE
Early	N	N_R385G	R	385	G	1	0.0371	0.0371	-2	-0.99999	-99.1344	4.1	0.99999	99.1344	4.1				147	0	FALSE	FALSE
Early	N	N_R385I	R	385	I	1	0.0304	0.0304	-3	-0.99999	-43.0281	9	0.99999	43.0281	9				1120	2	FALSE	FALSE
Early	N	N_R385M	R	385	M	1	0.0363	0.0363	-1	-1.25974	-24.9897	6.4	1.25974	24.9897	6.4				0	0	FALSE	FALSE
Early	N	N_R40L	R	40	L	1	0.1498	0.1498	-2	-0.99999	-43.0281	8.3	0.99999	43.0281	8.3				1126	5	FALSE	FALSE
Early	N	N_R68G	R	68	G	3	0.0325	0.073	-2	-0.99999	-99.1344	4.1	0.99999	99.1344	4.1				297	1	FALSE	FALSE
Early	N	N_R92T	R	92	T	1	0.0556	0.0556	-1	-1.3619	-55.0818	3.8	1.3619	55.0818	3.8				2	0	FALSE	FALSE
Early	N	N_R93L	R	93	L	2	0.0407	0.0445	-2	-0.99999	-43.0281	8.3	0.99999	43.0281	8.3				228	1	FALSE	FALSE
Early	N	N_R95C	R	95	C	1	0.0959	0.0959	-3	-1.00989	-53.0428	7	1.00989	53.0428	7				278	1	FALSE	FALSE
Early	N	N_S105N	S	105	N	2	0.0548	0.0682	1	0.299955	27.0253	-2.7	0.299955	27.0253	2.7				94	0	FALSE	FALSE
Early	N	N_S176I	S	176	I	1	0.039	0.039	-2	0.299955	26.0803	5.3	0.299955	26.0803	5.3				4	0	FALSE	FALSE
Early	N	N_S176R	S	176	R	1	0.068	0.068	-1	1.29995	69.1084	-3.7	1.29995	69.1084	3.7				12	0	FALSE	FALSE
Early	N	N_S187L	S	187	L	3	0.2308	0.2308	-2	0.299955	26.0803	4.6	0.299955	26.0803	4.6				9639	13	FALSE	FALSE
Early	N	N_S193G	S	193	G	1	0.15	0.15	0	0.299955	-30.026	0.4	0.299955	30.026	0.4				317	0	FALSE	FALSE
Early	N	N_S193I	S	193	I	1	0.0667	0.0667	-2	0.299955	26.0803	5.3	0.299955	26.0803	5.3				6639	308	FALSE	FALSE
Early	N	N_S194L	S	194	L	6	0.99365	0.9967	-2	0.299955	26.0803	4.6	0.299955	26.0803	4.6				87143	441	TRUE	FALSE
Early	N	N_S194T	S	194	T	6	0.0863	0.1739	1	-0.0619499	14.0266	0.1	0.0619499	14.0266	0.1				31	0	FALSE	FALSE
Early	N	N_S197L	S	197	L	8	0.997	1	-2	0.299955	26.0803	4.6	0.299955	26.0803	4.6				4578	1408	FALSE	FALSE
Early	N	N_S197Y	S	197	Y	1	0.0893	0.0893	-2	0.298956	76.0959	-0.5	0.298956	76.0959	0.5				0	0	FALSE	FALSE
Early	N	N_S202G	S	202	G	1	0.0469	0.0469	0	0.299955	-30.026	0.4	0.299955	30.026	0.4				328	1	FALSE	FALSE
Early	N	N_S202N	S	202	N	9	0.993	1	1	0.299955	27.0253	-2.7	0.299955	27.0253	2.7				3599	405	FALSE	FALSE
Early	N	N_S206F	S	206	F	1	0.1127	0.1127	-2	0.299955	60.0965	3.6	0.299955	60.0965	3.6				4348	3	FALSE	FALSE
Early	N	N_S21L	S	21	L	1	0.0362	0.0362	-2	0.299955	26.0803	4.6	0.299955	26.0803	4.6				186	0	FALSE	FALSE
Early	N	N_S232N	S	232	N	1	0.0404	0.0404	1	0.299955	27.0253	-2.7	0.299955	27.0253	2.7				415	0	FALSE	FALSE
Early	N	N_S235F	S	235	F	1	0.0309	0.0309	-2	0.299955	60.0965	3.6	0.299955	60.0965	3.6				651688	21	TRUE	FALSE
Early	N	N_S23P	S	23	P	1	1	1	-1	0.498382	10.0379	-0.8	0.498382	10.0379	0.8				2123	2	FALSE	FALSE
Early	N	N_S250F	S	250	F	1	0.0361	0.0361	-2	0.299955	60.0965	3.6	0.299955	60.0965	3.6				496	0	FALSE	FALSE
Early	N	N_S250N	S	250	N	1	0.0643	0.0643	1	0.299955	27.0253	-2.7	0.299955	27.0253	2.7				27	0	FALSE	FALSE
Early	N	N_S250P	S	250	P	1	0.051	0.051	-1	0.498382	10.0379	-0.8	0.498382	10.0379	0.8				155	1	FALSE	FALSE
Early	N	N_S250R	S	250	R	1	0.0417	0.0417	-1	1.29995	69.1084	-3.7	1.29995	69.1084	3.7				2	0	FALSE	FALSE
Early	N	N_S250T	S	250	T	1	0.133	0.133	1	-0.0619499	14.0266	0.1	0.0619499	14.0266	0.1				637	0	FALSE	FALSE
Early	N	N_S250V	S	250	V	1	0.0304	0.0304	-2	0.273842	12.0537	5	0.273842	12.0537	5				1	0	FALSE	FALSE
Early	N	N_S255A	S	255	A	1	0.0693	0.0693	1	0.335728	-15.9994	2.6	0.335728	15.9994	2.6				19	0	FALSE	FALSE
Early	N	N_S255C	S	255	C	1	0.0316	0.0316	-1	0.290054	16.0656	3.3	0.290054	16.0656	3.3				20	0	FALSE	FALSE
Early	N	N_S255P	S	255	P	2	0.06885	0.0891	-1	0.498382	10.0379	-0.8	0.498382	10.0379	0.8				24	0	FALSE	FALSE
Early	N	N_S255Y	S	255	Y	1	0.0372	0.0372	-2	0.298956	76.0959	-0.5	0.298956	76.0959	0.5				26	0	FALSE	FALSE
Early	N	N_S26D	S	26	D	2	0.04355	0.0436	0	-0.695743	28.0101	-2.7	0.695743	28.0101	2.7				0	0	FALSE	FALSE
Early	N	N_S26G	S	26	G	2	0.04895	0.049	0	0.299955	-30.026	0.4	0.299955	30.026	0.4				277	1	FALSE	FALSE
Early	N	N_S2V	S	2	V	3	0.0492	0.1275	-2	0.273842	12.0537	5	0.273842	12.0537	5				0	0	FALSE	FALSE
Early	N	N_S310C	S	310	C	1	0.0339	0.0339	-1	0.290054	16.0656	3.3	0.290054	16.0656	3.3				75	0	FALSE	FALSE
Early	N	N_S310I	S	310	I	1	0.0515	0.0515	-2	0.299955	26.0803	5.3	0.299955	26.0803	5.3				156	0	FALSE	FALSE
Early	N	N_S310N	S	310	N	1	0.062	0.062	1	0.299955	27.0253	-2.7	0.299955	27.0253	2.7				430	3	FALSE	FALSE
Early	N	N_S318L	S	318	L	1	0.0365	0.0365	-2	0.299955	26.0803	4.6	0.299955	26.0803	4.6				10	0	FALSE	FALSE
Early	N	N_S318T	S	318	T	1	0.0446	0.0446	1	-0.0619499	14.0266	0.1	0.0619499	14.0266	0.1				4	0	FALSE	FALSE
Early	N	N_S327L	S	327	L	1	0.0486	0.0486	-2	0.299955	26.0803	4.6	0.299955	26.0803	4.6				33485	40	FALSE	FALSE
Early	N	N_S33I	S	33	I	1	0.0567	0.0567	-2	0.299955	26.0803	5.3	0.299955	26.0803	5.3				5971	12	FALSE	FALSE
Early	N	N_S33M	S	33	M	2	0.0892	0.0893	-1	0.0402082	44.1187	2.7	0.0402082	44.1187	2.7				7	0	FALSE	FALSE
Early	N	N_S33T	S	33	T	2	0.07365	0.0737	1	-0.0619499	14.0266	0.1	0.0619499	14.0266	0.1				46	0	FALSE	FALSE
Early	N	N_S410F	S	410	F	1	0.0345	0.0345	-2	0.299955	60.0965	3.6	0.299955	60.0965	3.6				81	0	FALSE	FALSE
Early	N	N_S412N	S	412	N	1	0.0748	0.0748	1	0.299955	27.0253	-2.7	0.299955	27.0253	2.7				2005	0	FALSE	FALSE
Early	N	N_S416L	S	416	L	1	0.053	0.053	-2	0.299955	26.0803	4.6	0.299955	26.0803	4.6				2810	5	FALSE	FALSE
Early	N	N_S51Y	S	51	Y	1	0.0707	0.0707	-2	0.298956	76.0959	-0.5	0.298956	76.0959	0.5				2	0	FALSE	FALSE
Early	N	N_S78T	S	78	T	1	0.0805	0.0805	1	-0.0619499	14.0266	0.1	0.0619499	14.0266	0.1				11	0	FALSE	FALSE
Early	N	N_S79C	S	79	C	1	0.0573	0.0573	-1	0.290054	16.0656	3.3	0.290054	16.0656	3.3				97	0	FALSE	FALSE
Early	N	N_T115A	T	115	A	1	0.0462	0.0462	0	0.397678	-30.026	2.5	0.397678	30.026	2.5				1	0	FALSE	FALSE
Early	N	N_T135I	T	135	I	2	0.07285	0.0729	-1	0.361905	12.0537	5.2	0.361905	12.0537	5.2				24174	11	FALSE	FALSE
Early	N	N_T141A	T	141	A	1	0.0391	0.0391	0	0.397678	-30.026	2.5	0.397678	30.026	2.5				151	0	FALSE	FALSE
Early	N	N_T148I	T	148	I	1	0.1977	0.1977	-1	0.361905	12.0537	5.2	0.361905	12.0537	5.2				350	1	FALSE	FALSE
Early	N	N_T16I	T	16	I	2	0.11175	0.1119	-1	0.361905	12.0537	5.2	0.361905	12.0537	5.2				2	0	FALSE	FALSE
Early	N	N_T16S	T	16	S	3	0.0558	0.0559	1	0.0619499	-14.0266	-0.1	0.0619499	14.0266	0.1				501	0	FALSE	FALSE
Early	N	N_T198P	T	198	P	1	0.0591	0.0591	-1	0.560332	-3.9887	-0.9	0.560332	3.9887	0.9				17	0	FALSE	FALSE
Early	N	N_T205P	T	205	P	2	0.03125	0.0321	-1	0.560332	-3.9887	-0.9	0.560332	3.9887	0.9				88	0	FALSE	FALSE
Early	N	N_T245G	T	245	G	1	0.0415	0.0415	-2	0.361905	-44.0526	0.3	0.361905	44.0526	0.3				0	0	FALSE	FALSE
Early	N	N_T245P	T	245	P	1	0.086	0.086	-1	0.560332	-3.9887	-0.9	0.560332	3.9887	0.9				114	0	FALSE	FALSE
Early	N	N_T247N	T	247	N	1	0.0463	0.0463	0	0.361905	12.9987	-2.8	0.361905	12.9987	2.8				143	1	FALSE	FALSE
Early	N	N_T247S	T	247	S	2	0.03895	0.0408	1	0.0619499	-14.0266	-0.1	0.0619499	14.0266	0.1				420	0	FALSE	FALSE
Early	N	N_T24I	T	24	I	2	0.072	0.0991	-1	0.361905	12.0537	5.2	0.361905	12.0537	5.2				8964	24	FALSE	FALSE
Early	N	N_T24N	T	24	N	3	0.6683	0.9941	0	0.361905	12.9987	-2.8	0.361905	12.9987	2.8				763	58	FALSE	FALSE
Early	N	N_T263M	T	263	M	1	0.0445	0.0445	-1	0.102158	30.0921	2.6	0.102158	30.0921	2.6				0	0	FALSE	FALSE
Early	N	N_T265I	T	265	I	1	0.0395	0.0395	-1	0.361905	12.0537	5.2	0.361905	12.0537	5.2				3756	5	FALSE	FALSE
Early	N	N_T265P	T	265	P	1	0.0588	0.0588	-1	0.560332	-3.9887	-0.9	0.560332	3.9887	0.9				5	0	FALSE	FALSE
Early	N	N_T271P	T	271	P	1	0.0369	0.0369	-1	0.560332	-3.9887	-0.9	0.560332	3.9887	0.9				52	0	FALSE	FALSE
Early	N	N_T282P	T	282	P	1	0.0338	0.0338	-1	0.560332	-3.9887	-0.9	0.560332	3.9887	0.9				18	0	FALSE	FALSE
Early	N	N_T282S	T	282	S	2	0.0544	0.0772	1	0.0619499	-14.0266	-0.1	0.0619499	14.0266	0.1				121	0	FALSE	FALSE
Early	N	N_T325I	T	325	I	3	0.0737	0.1014	-1	0.361905	12.0537	5.2	0.361905	12.0537	5.2				3215	23	FALSE	FALSE
Early	N	N_T325R	T	325	R	1	0.1703	0.1703	-1	1.3619	55.0818	-3.8	1.3619	55.0818	3.8				49	0	FALSE	FALSE
Early	N	N_T329P	T	329	P	1	0.0532	0.0532	-1	0.560332	-3.9887	-0.9	0.560332	3.9887	0.9				4	0	FALSE	FALSE
Early	N	N_T329R	T	329	R	1	0.0504	0.0504	-1	1.3619	55.0818	-3.8	1.3619	55.0818	3.8				3	0	FALSE	FALSE
Early	N	N_T334I	T	334	I	4	0.18535	0.2463	-1	0.361905	12.0537	5.2	0.361905	12.0537	5.2				6999	18	FALSE	FALSE
Early	N	N_T366L	T	366	L	3	0.0443	0.0578	-1	0.361905	12.0537	4.5	0.361905	12.0537	4.5				2	0	FALSE	FALSE
Early	N	N_T379M	T	379	M	1	0.0307	0.0307	-1	0.102158	30.0921	2.6	0.102158	30.0921	2.6				0	0	FALSE	FALSE
Early	N	N_T391M	T	391	M	1	0.0424	0.0424	-1	0.102158	30.0921	2.6	0.102158	30.0921	2.6				0	0	FALSE	FALSE
Early	N	N_T391N	T	391	N	2	0.089	0.1204	0	0.361905	12.9987	-2.8	0.361905	12.9987	2.8				117	0	FALSE	FALSE
Early	N	N_T393A	T	393	A	2	0.04805	0.0539	0	0.397678	-30.026	2.5	0.397678	30.026	2.5				21	0	FALSE	FALSE
Early	N	N_T393P	T	393	P	1	0.035	0.035	-1	0.560332	-3.9887	-0.9	0.560332	3.9887	0.9				13	0	FALSE	FALSE
Early	N	N_T417I	T	417	I	1	0.0565	0.0565	-1	0.361905	12.0537	5.2	0.361905	12.0537	5.2				3264	10	FALSE	FALSE
Early	N	N_T54S	T	54	S	1	0.0528	0.0528	1	0.0619499	-14.0266	-0.1	0.0619499	14.0266	0.1				108	0	FALSE	FALSE
Early	N	N_T57I	T	57	I	2	0.05025	0.0626	-1	0.361905	12.0537	5.2	0.361905	12.0537	5.2				10	0	FALSE	FALSE
Early	N	N_T57K	T	57	K	3	0.0326	0.0346	-1	1.36091	27.0684	-3.2	1.36091	27.0684	3.2				0	0	FALSE	FALSE
Early	N	N_T57S	T	57	S	1	0.0411	0.0411	1	0.0619499	-14.0266	-0.1	0.0619499	14.0266	0.1				12	0	FALSE	FALSE
Early	N	N_V133I	V	133	I	1	0.0319	0.0319	3	0.0261132	14.0266	0.3	0.0261132	14.0266	0.3				0	0	FALSE	FALSE
Early	N	N_V158L	V	158	L	1	0.0437	0.0437	1	0.0261132	14.0266	-0.4	0.0261132	14.0266	0.4				295	1	FALSE	FALSE
Early	N	N_V246I	V	246	I	1	0.0376	0.0376	3	0.0261132	14.0266	0.3	0.0261132	14.0266	0.3				588	22	FALSE	FALSE
Early	N	N_V246M	V	246	M	4	0.0333	0.2132	1	-0.233634	32.065	-2.3	0.233634	32.065	2.3				5	0	FALSE	FALSE
Early	N	N_V270L	V	270	L	1	0.0596	0.0596	1	0.0261132	14.0266	-0.4	0.0261132	14.0266	0.4				9908	4	FALSE	FALSE
Early	N	N_V324A	V	324	A	1	0.1212	0.1212	0	0.0618862	-28.0531	-2.4	0.0618862	28.0531	2.4				410	2	FALSE	FALSE
Early	N	N_V324G	V	324	G	1	0.1428	0.1428	-3	0.0261132	-42.0797	-4.6	0.0261132	42.0797	4.6				38	0	FALSE	FALSE
Early	N	N_V350G	V	350	G	1	0.0377	0.0377	-3	0.0261132	-42.0797	-4.6	0.0261132	42.0797	4.6				8	0	FALSE	FALSE
Early	N	N_V392E	V	392	E	1	0.0434	0.0434	-2	-0.891923	29.983	-7.7	0.891923	29.983	7.7				3	0	FALSE	FALSE
Early	N	N_V392G	V	392	G	2	0.0389	0.0469	-3	0.0261132	-42.0797	-4.6	0.0261132	42.0797	4.6				2	0	FALSE	FALSE
Early	N	N_V392L	V	392	L	2	0.06325	0.092	1	0.0261132	14.0266	-0.4	0.0261132	14.0266	0.4				1463	3	FALSE	FALSE
Early	N	N_V72L	V	72	L	1	0.0478	0.0478	1	0.0261132	14.0266	-0.4	0.0261132	14.0266	0.4				730	0	FALSE	FALSE
Early	N	N_W108R	W	108	R	1	0.1475	0.1475	-3	0.99999	-30.0242	-3.6	0.99999	30.0242	3.6				3	0	FALSE	FALSE
Early	N	N_W132L	W	132	L	1	0.0356	0.0356	-2	0	-73.0523	4.7	0	73.0523	4.7				4	0	FALSE	FALSE
Early	N	N_W301S	W	301	S	1	0.0318	0.0318	-3	-0.299955	-99.1326	0.1	0.299955	99.1326	0.1				1	0	FALSE	FALSE
Early	N	N_W52C	W	52	C	2	0.0385	0.0444	-2	-0.00990099	-83.067	3.4	0.00990099	83.067	3.4				7	0	FALSE	FALSE
Early	N	N_W52R	W	52	R	1	0.0461	0.0461	-3	0.99999	-30.0242	-3.6	0.99999	30.0242	3.6				9	0	FALSE	FALSE
Early	N	N_Y111C	Y	111	C	1	0.0887	0.0887	-2	-0.00890199	-60.0303	3.8	0.00890199	60.0303	3.8				1	0	FALSE	FALSE
Early	N	N_Y111H	Y	111	H	1	0.0464	0.0464	2	0.0881732	-26.0339	-1.9	0.0881732	26.0339	1.9				4	0	FALSE	FALSE
Early	N	N_Y112H	Y	112	H	1	0.0312	0.0312	2	0.0881732	-26.0339	-1.9	0.0881732	26.0339	1.9				8	0	FALSE	FALSE
Early	N	N_Y123H	Y	123	H	1	0.0469	0.0469	2	0.0881732	-26.0339	-1.9	0.0881732	26.0339	1.9				18	0	FALSE	FALSE
Early	N	N_Y298C	Y	298	C	1	0.0839	0.0839	-2	-0.00890199	-60.0303	3.8	0.00890199	60.0303	3.8				25	0	FALSE	FALSE
Early	N	N_Y298F	Y	298	F	2	0.0664	0.0818	3	0.000999001	-15.9994	4.1	0.000999001	15.9994	4.1				28	0	FALSE	FALSE
Early	N	N_Y333S	Y	333	S	1	0.0427	0.0427	-2	-0.298956	-76.0959	0.5	0.298956	76.0959	0.5				3	0	FALSE	FALSE
Early	N	N_Y360C	Y	360	C	2	0.0671	0.0671	-2	-0.00890199	-60.0303	3.8	0.00890199	60.0303	3.8				0	0	FALSE	FALSE
Early	N	N_Y87H	Y	87	H	1	0.0346	0.0346	2	0.0881732	-26.0339	-1.9	0.0881732	26.0339	1.9				6	0	FALSE	FALSE
Early	NS10	NS10_D31N	D	31	N	1	0.043	0.043	1	0.995698	-0.9848	0	0.995698	0.9848	0				0	0	FALSE	FALSE
Early	NS10	NS10_F35E	F	35	E	2	0.05015	0.055	-3	-0.918037	-18.0598	-6.3	0.918037	18.0598	6.3				0	0	FALSE	FALSE
Early	NS10	NS10_G2D	G	2	D	3	0.0816	0.4489	-1	-0.995698	58.0361	-3.1	0.995698	58.0361	3.1				0	0	FALSE	FALSE
Early	NS10	NS10_G2V	G	2	V	1	0.0442	0.0442	-3	-0.0261132	42.0797	4.6	0.0261132	42.0797	4.6				0	0	FALSE	FALSE
Early	NS10	NS10_I13L	I	13	L	19	0.0901	0.1561	2	0	0	-0.7	0	0	0.7				0	0	FALSE	FALSE
Early	NS10	NS10_I13M	I	13	M	28	0.996	1	1	-0.259747	18.0384	-2.6	0.259747	18.0384	2.6				0	0	FALSE	FALSE
Early	NS10	NS10_I13R	I	13	R	1	0.0343	0.0343	-3	0.99999	43.0281	-9	0.99999	43.0281	9				0	0	FALSE	FALSE
Early	NS10	NS10_I13T	I	13	T	1	0.0559	0.0559	-1	-0.361905	-12.0537	-5.2	0.361905	12.0537	5.2				0	0	FALSE	FALSE
Early	NS10	NS10_I13V	I	13	V	1	0.0403	0.0403	3	-0.0261132	-14.0266	-0.3	0.0261132	14.0266	0.3				0	0	FALSE	FALSE
Early	NS10	NS10_I27T	I	27	T	6	0.0537	0.0544	-1	-0.361905	-12.0537	-5.2	0.361905	12.0537	5.2				0	0	FALSE	FALSE
Early	NS10	NS10_I4V	I	4	V	1	0.0341	0.0341	3	-0.0261132	-14.0266	-0.3	0.0261132	14.0266	0.3				0	0	FALSE	FALSE
Early	NS10	NS10_L16I	L	16	I	1	0.0387	0.0387	2	0	0	0.7	0	0	0.7				0	0	FALSE	FALSE
Early	NS10	NS10_L16P	L	16	P	2	0.0325	0.0344	-3	0.198427	-16.0424	-5.4	0.198427	16.0424	5.4				0	0	FALSE	FALSE
Early	NS10	NS10_L17H	L	17	H	1	0.0504	0.0504	-3	0.0871742	23.9817	-7	0.0871742	23.9817	7				0	0	FALSE	FALSE
Early	NS10	NS10_M1G	M	1	G	1	0.0626	0.0626	-3	0.259747	-74.1447	-2.3	0.259747	74.1447	2.3				0	0	FALSE	FALSE
Early	NS10	NS10_M1I	M	1	I	1	0.0807	0.0807	1	0.259747	-18.0384	2.6	0.259747	18.0384	2.6				0	0	FALSE	FALSE
Early	NS10	NS10_M1V	M	1	V	1	0.1056	0.1056	1	0.233634	-32.065	2.3	0.233634	32.065	2.3				0	0	FALSE	FALSE
Early	NS10	NS10_M21I	M	21	I	2	0.0382	0.046	1	0.259747	-18.0384	2.6	0.259747	18.0384	2.6				0	0	FALSE	FALSE
Early	NS10	NS10_N22H	N	22	H	1	0.0305	0.0305	1	0.0871742	23.0367	0.3	0.0871742	23.0367	0.3				0	0	FALSE	FALSE
Early	NS10	NS10_N34K	N	34	K	1	0.031	0.031	0	0.999001	14.0697	-0.4	0.999001	14.0697	0.4				0	0	FALSE	FALSE
Early	NS10	NS10_N36I	N	36	I	1	0.0436	0.0436	-3	0	-0.945	8	0	0.945	8				0	0	FALSE	FALSE
Early	NS10	NS10_N5Y	N	5	Y	1	0.0796	0.0796	-2	-0.000999001	49.0706	2.2	0.000999001	49.0706	2.2				0	0	FALSE	FALSE
Early	NS10	NS10_P10A	P	10	A	1	0.0372	0.0372	-1	-0.162654	-26.0373	3.4	0.162654	26.0373	3.4				0	0	FALSE	FALSE
Early	NS10	NS10_P10H	P	10	H	1	0.0522	0.0522	-2	-0.111253	40.0241	-1.6	0.111253	40.0241	1.6				0	0	FALSE	FALSE
Early	NS10	NS10_P10S	P	10	S	10	0.21645	0.2777	-1	-0.498382	-10.0379	0.8	0.498382	10.0379	0.8				0	0	FALSE	FALSE
Early	NS10	NS10_R20G	R	20	G	1	0.0416	0.0416	-2	-0.99999	-99.1344	4.1	0.99999	99.1344	4.1				0	0	FALSE	FALSE
Early	NS10	NS10_R24S	R	24	S	1	0.0339	0.0339	-1	-1.29995	-69.1084	3.7	1.29995	69.1084	3.7				0	0	FALSE	FALSE
Early	NS10	NS10_V30L	V	30	L	1	0.0823	0.0823	1	0.0261132	14.0266	-0.4	0.0261132	14.0266	0.4				0	0	FALSE	FALSE
Early	NS10	NS10_Y26H	Y	26	H	2	0.09045	0.1494	2	0.0881732	-26.0339	-1.9	0.0881732	26.0339	1.9				0	0	FALSE	FALSE
Early	NS10	NS10_Y26N	Y	26	N	1	0.053	0.053	-2	0.000999001	-49.0706	-2.2	0.000999001	49.0706	2.2				0	0	FALSE	FALSE
Early	NS3	NS3_A103S	A	103	S	3	0.0372	0.0372	1	-0.335728	15.9994	-2.6	0.335728	15.9994	2.6				2364	5	FALSE	FALSE
Early	NS3	NS3_A110P	A	110	P	1	0.0406	0.0406	-1	0.162654	26.0373	-3.4	0.162654	26.0373	3.4				48	1	FALSE	FALSE
Early	NS3	NS3_A110V	A	110	V	1	0.032	0.032	0	-0.0618862	28.0531	2.4	0.0618862	28.0531	2.4				22401	18	FALSE	FALSE
Early	NS3	NS3_A143E	A	143	E	1	0.0318	0.0318	-1	-0.95381	58.0361	-5.3	0.95381	58.0361	5.3				32	0	FALSE	FALSE
Early	NS3	NS3_A23S	A	23	S	1	0.059	0.059	1	-0.335728	15.9994	-2.6	0.335728	15.9994	2.6				7106	9	FALSE	FALSE
Early	NS3	NS3_A23V	A	23	V	1	0.1226	0.1226	0	-0.0618862	28.0531	2.4	0.0618862	28.0531	2.4				9124	14	FALSE	FALSE
Early	NS3	NS3_A31D	A	31	D	2	0.0693	0.1056	-2	-1.03147	44.0095	-5.3	1.03147	44.0095	5.3				255	0	FALSE	FALSE
Early	NS3	NS3_A33S	A	33	S	1	0.0333	0.0333	1	-0.335728	15.9994	-2.6	0.335728	15.9994	2.6				11758	10	FALSE	FALSE
Early	NS3	NS3_A33T	A	33	T	1	0.0548	0.0548	0	-0.397678	30.026	-2.5	0.397678	30.026	2.5				609	5	FALSE	FALSE
Early	NS3	NS3_A39S	A	39	S	1	0.1034	0.1034	1	-0.335728	15.9994	-2.6	0.335728	15.9994	2.6				832	1	FALSE	FALSE
Early	NS3	NS3_A54L	A	54	L	1	0.0849	0.0849	-1	-0.035773	42.0797	2	0.035773	42.0797	2				143	0	FALSE	FALSE
Early	NS3	NS3_A54S	A	54	S	1	0.0401	0.0401	1	-0.335728	15.9994	-2.6	0.335728	15.9994	2.6				9760	77	FALSE	FALSE
Early	NS3	NS3_A59D	A	59	D	1	0.9955	0.9955	-2	-1.03147	44.0095	-5.3	1.03147	44.0095	5.3				10	2	FALSE	FALSE
Early	NS3	NS3_A99V	A	99	V	2	0.55145	0.9976	0	-0.0618862	28.0531	2.4	0.0618862	28.0531	2.4				9682	332	FALSE	FALSE
Early	NS3	NS3_C133W	C	133	W	1	0.0786	0.0786	-2	0.00990099	83.067	-3.4	0.00990099	83.067	3.4				1	0	FALSE	FALSE
Early	NS3	NS3_C133Y	C	133	Y	2	0.0355	0.0364	-2	0.00890199	60.0303	-3.8	0.00890199	60.0303	3.8				3	1	FALSE	FALSE
Early	NS3	NS3_C148F	C	148	F	1	0.3013	0.3013	-2	0.00990099	44.0309	0.3	0.00990099	44.0309	0.3				89	1	FALSE	FALSE
Early	NS3	NS3_C153S	C	153	S	1	0.0622	0.0622	-1	-0.290054	-16.0656	-3.3	0.290054	16.0656	3.3				701	0	FALSE	FALSE
Early	NS3	NS3_D173C	D	173	C	1	0.0446	0.0446	-3	0.985797	-11.9445	6	0.985797	11.9445	6				0	0	FALSE	FALSE
Early	NS3	NS3_D173G	D	173	G	1	0.0426	0.0426	-1	0.995698	-58.0361	3.1	0.995698	58.0361	3.1				4504	5	FALSE	FALSE
Early	NS3	NS3_D173N	D	173	N	1	0.0361	0.0361	1	0.995698	-0.9848	0	0.995698	0.9848	0				375	1	FALSE	FALSE
Early	NS3	NS3_D173Y	D	173	Y	1	0.0369	0.0369	-3	0.994699	48.0858	2.2	0.994699	48.0858	2.2				498	6	FALSE	FALSE
Early	NS3	NS3_D183N	D	183	N	1	0.032	0.032	1	0.995698	-0.9848	0	0.995698	0.9848	0				1166	0	FALSE	FALSE
Early	NS3	NS3_D199N	D	199	N	1	0.2902	0.2902	1	0.995698	-0.9848	0	0.995698	0.9848	0				95	0	FALSE	FALSE
Early	NS3	NS3_D199Y	D	199	Y	1	0.0453	0.0453	-3	0.994699	48.0858	2.2	0.994699	48.0858	2.2				502	0	FALSE	FALSE
Early	NS3	NS3_D222A	D	222	A	7	0.0683	0.0772	-2	1.03147	-44.0095	5.3	1.03147	44.0095	5.3				100	3	FALSE	FALSE
Early	NS3	NS3_E102V	E	102	V	3	0.0443	0.0443	-2	0.891923	-29.983	7.7	0.891923	29.983	7.7				860	0	FALSE	FALSE
Early	NS3	NS3_E181Q	E	181	Q	1	0.0668	0.0668	2	0.918037	-0.9848	0	0.918037	0.9848	0				267	0	FALSE	FALSE
Early	NS3	NS3_E226G	E	226	G	1	0.0352	0.0352	-2	0.918037	-72.0627	3.1	0.918037	72.0627	3.1				2802	1	FALSE	FALSE
Early	NS3	NS3_E226K	E	226	K	6	0.0588	0.0885	1	1.91704	-0.9417	-0.4	1.91704	0.9417	0.4				291	0	FALSE	FALSE
Early	NS3	NS3_E239D	E	239	D	1	0.0404	0.0404	2	-0.0776616	-14.0266	0	0.0776616	14.0266	0				5890	13	FALSE	FALSE
Early	NS3	NS3_F105I	F	105	I	8	0.03775	0.0895	0	0	-34.0162	1.7	0	34.0162	1.7				25	1	FALSE	FALSE
Early	NS3	NS3_F105L	F	105	L	1	0.9897	0.9897	0	0	-34.0162	1	0	34.0162	1				1952	1	FALSE	FALSE
Early	NS3	NS3_F105Y	F	105	Y	10	0.03835	0.094	3	-0.000999001	15.9994	-4.1	0.000999001	15.9994	4.1				46	0	FALSE	FALSE
Early	NS3	NS3_F120L	F	120	L	1	0.0483	0.0483	0	0	-34.0162	1	0	34.0162	1				665	0	FALSE	FALSE
Early	NS3	NS3_F146I	F	146	I	1	0.0489	0.0489	0	0	-34.0162	1.7	0	34.0162	1.7				13	0	FALSE	FALSE
Early	NS3	NS3_F146L	F	146	L	1	0.0354	0.0354	0	0	-34.0162	1	0	34.0162	1				30	0	FALSE	FALSE
Early	NS3	NS3_F146S	F	146	S	1	0.0383	0.0383	-2	-0.299955	-60.0965	-3.6	0.299955	60.0965	3.6				59	0	FALSE	FALSE
Early	NS3	NS3_F146V	F	146	V	1	0.057	0.057	-1	-0.0261132	-48.0428	1.4	0.0261132	48.0428	1.4				0	0	FALSE	FALSE
Early	NS3	NS3_F230L	F	230	L	1	0.1234	0.1234	0	0	-34.0162	1	0	34.0162	1				174	2	FALSE	FALSE
Early	NS3	NS3_F28S	F	28	S	1	0.1137	0.1137	-2	-0.299955	-60.0965	-3.6	0.299955	60.0965	3.6				343	0	FALSE	FALSE
Early	NS3	NS3_F43L	F	43	L	2	0.0584	0.0589	0	0	-34.0162	1	0	34.0162	1				2570	5	FALSE	FALSE
Early	NS3	NS3_F43Y	F	43	Y	1	0.0778	0.0778	3	-0.000999001	15.9994	-4.1	0.000999001	15.9994	4.1				282	3	FALSE	FALSE
Early	NS3	NS3_F4C	F	4	C	2	0.0407	0.0485	-2	-0.00990099	-44.0309	-0.3	0.00990099	44.0309	0.3				4	0	FALSE	FALSE
Early	NS3	NS3_F4L	F	4	L	1	0.0316	0.0316	0	0	-34.0162	1	0	34.0162	1				84	0	FALSE	FALSE
Early	NS3	NS3_F4S	F	4	S	2	0.04645	0.0613	-2	-0.299955	-60.0965	-3.6	0.299955	60.0965	3.6				16	0	FALSE	FALSE
Early	NS3	NS3_F56L	F	56	L	1	0.2268	0.2268	0	0	-34.0162	1	0	34.0162	1				606	0	FALSE	FALSE
Early	NS3	NS3_F79S	F	79	S	1	0.0319	0.0319	-2	-0.299955	-60.0965	-3.6	0.299955	60.0965	3.6				525	0	FALSE	FALSE
Early	NS3	NS3_F8I	F	8	I	1	0.0328	0.0328	0	0	-34.0162	1.7	0	34.0162	1.7				4	0	FALSE	FALSE
Early	NS3	NS3_F8L	F	8	L	1	0.0773	0.0773	0	0	-34.0162	1	0	34.0162	1				428	19	FALSE	FALSE
Early	NS3	NS3_F8N	F	8	N	4	0.0389	0.0656	-3	0	-33.0712	-6.3	0	33.0712	6.3				0	0	FALSE	FALSE
Early	NS3	NS3_F8S	F	8	S	1	0.0328	0.0328	-2	-0.299955	-60.0965	-3.6	0.299955	60.0965	3.6				23	0	FALSE	FALSE
Early	NS3	NS3_G100I	G	100	I	2	0.0667	0.0667	-4	0	56.1063	4.9	0	56.1063	4.9				0	0	FALSE	FALSE
Early	NS3	NS3_G100S	G	100	S	1	0.0563	0.0563	0	-0.299955	30.026	-0.4	0.299955	30.026	0.4				1867	1	FALSE	FALSE
Early	NS3	NS3_G11V	G	11	V	1	0.0376	0.0376	-3	-0.0261132	42.0797	4.6	0.0261132	42.0797	4.6				236	1	FALSE	FALSE
Early	NS3	NS3_G172P	G	172	P	1	0.0777	0.0777	-2	0.198427	40.0639	-1.2	0.198427	40.0639	1.2				0	0	FALSE	FALSE
Early	NS3	NS3_G172V	G	172	V	1	0.1944	0.1944	-3	-0.0261132	42.0797	4.6	0.0261132	42.0797	4.6				114390	9	TRUE	FALSE
Early	NS3	NS3_G174A	G	174	A	1	0.0676	0.0676	0	0.035773	14.0266	2.2	0.035773	14.0266	2.2				15	2	FALSE	FALSE
Early	NS3	NS3_G188S	G	188	S	1	0.0345	0.0345	0	-0.299955	30.026	-0.4	0.299955	30.026	0.4				139	0	FALSE	FALSE
Early	NS3	NS3_G18D	G	18	D	1	0.034	0.034	-1	-0.995698	58.0361	-3.1	0.995698	58.0361	3.1				1724	0	FALSE	FALSE
Early	NS3	NS3_G18S	G	18	S	1	0.0485	0.0485	0	-0.299955	30.026	-0.4	0.299955	30.026	0.4				655	0	FALSE	FALSE
Early	NS3	NS3_G196V	G	196	V	9	0.9755	1	-3	-0.0261132	42.0797	4.6	0.0261132	42.0797	4.6				2819	1394	FALSE	FALSE
Early	NS3	NS3_G254R	G	254	R	1	0.1181	0.1181	-2	0.99999	99.1344	-4.1	0.99999	99.1344	4.1				2210	23	FALSE	FALSE
Early	NS3	NS3_G44E	G	44	E	1	0.0606	0.0606	-2	-0.918037	72.0627	-3.1	0.918037	72.0627	3.1				1085	3	FALSE	FALSE
Early	NS3	NS3_G49I	G	49	I	1	0.0309	0.0309	-4	0	56.1063	4.9	0	56.1063	4.9				23	3	FALSE	FALSE
Early	NS3	NS3_H182Y	H	182	Y	1	0.0726	0.0726	2	-0.0881732	26.0339	1.9	0.0881732	26.0339	1.9				5330	6	FALSE	FALSE
Early	NS3	NS3_H243D	H	243	D	1	0.0595	0.0595	-1	-1.08287	-22.0519	-0.3	1.08287	22.0519	0.3				8	0	FALSE	FALSE
Early	NS3	NS3_H243Y	H	243	Y	1	0.3216	0.3216	2	-0.0881732	26.0339	1.9	0.0881732	26.0339	1.9				250	0	FALSE	FALSE
Early	NS3	NS3_H78Y	H	78	Y	2	0.1235	0.1946	2	-0.0881732	26.0339	1.9	0.0881732	26.0339	1.9				91755	14	TRUE	FALSE
Early	NS3	NS3_I10M	I	10	M	1	0.049	0.049	1	-0.259747	18.0384	-2.6	0.259747	18.0384	2.6				21	0	FALSE	FALSE
Early	NS3	NS3_I10N	I	10	N	1	0.0307	0.0307	-3	0	0.945	-8	0	0.945	8				45	0	FALSE	FALSE
Early	NS3	NS3_I10T	I	10	T	1	0.1156	0.1156	-1	-0.361905	-12.0537	-5.2	0.361905	12.0537	5.2				228	0	FALSE	FALSE
Early	NS3	NS3_I118H	I	118	H	1	0.0607	0.0607	-3	0.0871742	23.9817	-7.7	0.0871742	23.9817	7.7				0	0	FALSE	FALSE
Early	NS3	NS3_I118L	I	118	L	1	0.0641	0.0641	2	0	0	-0.7	0	0	0.7				205	0	FALSE	FALSE
Early	NS3	NS3_I123E	I	123	E	1	0.0301	0.0301	-3	-0.918037	15.9564	-8	0.918037	15.9564	8				1	0	FALSE	FALSE
Early	NS3	NS3_I123K	I	123	K	1	0.0904	0.0904	-3	0.999001	15.0147	-8.4	0.999001	15.0147	8.4				4	0	FALSE	FALSE
Early	NS3	NS3_I123L	I	123	L	1	0.1569	0.1569	2	0	0	-0.7	0	0	0.7				1078	0	FALSE	FALSE
Early	NS3	NS3_I123T	I	123	T	1	0.2349	0.2349	-1	-0.361905	-12.0537	-5.2	0.361905	12.0537	5.2				836	0	FALSE	FALSE
Early	NS3	NS3_I123V	I	123	V	3	0.0542	0.0663	3	-0.0261132	-14.0266	-0.3	0.0261132	14.0266	0.3				169	1	FALSE	FALSE
Early	NS3	NS3_I124L	I	124	L	1	0.5654	0.5654	2	0	0	-0.7	0	0	0.7				734	0	FALSE	FALSE
Early	NS3	NS3_I124V	I	124	V	3	0.0629	0.0629	3	-0.0261132	-14.0266	-0.3	0.0261132	14.0266	0.3				227	0	FALSE	FALSE
Early	NS3	NS3_I158L	I	158	L	1	0.0304	0.0304	2	0	0	-0.7	0	0	0.7				101	0	FALSE	FALSE
Early	NS3	NS3_I158R	I	158	R	1	0.0353	0.0353	-3	0.99999	43.0281	-9	0.99999	43.0281	9				0	0	FALSE	FALSE
Early	NS3	NS3_I158T	I	158	T	1	0.2535	0.2535	-1	-0.361905	-12.0537	-5.2	0.361905	12.0537	5.2				209	3	FALSE	FALSE
Early	NS3	NS3_I169M	I	169	M	1	0.0468	0.0468	1	-0.259747	18.0384	-2.6	0.259747	18.0384	2.6				4	0	FALSE	FALSE
Early	NS3	NS3_I169R	I	169	R	1	0.0375	0.0375	-3	0.99999	43.0281	-9	0.99999	43.0281	9				1	0	FALSE	FALSE
Early	NS3	NS3_I169V	I	169	V	1	0.0741	0.0741	3	-0.0261132	-14.0266	-0.3	0.0261132	14.0266	0.3				1244	0	FALSE	FALSE
Early	NS3	NS3_I179T	I	179	T	1	0.1397	0.1397	-1	-0.361905	-12.0537	-5.2	0.361905	12.0537	5.2				1115	0	FALSE	FALSE
Early	NS3	NS3_I249L	I	249	L	3	0.0411	0.106	2	0	0	-0.7	0	0	0.7				65	0	FALSE	FALSE
Early	NS3	NS3_I263T	I	263	T	12	0.0344	0.0708	-1	-0.361905	-12.0537	-5.2	0.361905	12.0537	5.2				419	0	FALSE	FALSE
Early	NS3	NS3_I35L	I	35	L	1	0.0475	0.0475	2	0	0	-0.7	0	0	0.7				286	0	FALSE	FALSE
Early	NS3	NS3_I37N	I	37	N	1	0.0329	0.0329	-3	0	0.945	-8	0	0.945	8				0	0	FALSE	FALSE
Early	NS3	NS3_I47T	I	47	T	1	0.0347	0.0347	-1	-0.361905	-12.0537	-5.2	0.361905	12.0537	5.2				995	0	FALSE	FALSE
Early	NS3	NS3_I62T	I	62	T	1	0.0474	0.0474	-1	-0.361905	-12.0537	-5.2	0.361905	12.0537	5.2				4133	20	FALSE	FALSE
Early	NS3	NS3_I63L	I	63	L	1	0.0334	0.0334	2	0	0	-0.7	0	0	0.7				304	0	FALSE	FALSE
Early	NS3	NS3_I63M	I	63	M	1	0.0773	0.0773	1	-0.259747	18.0384	-2.6	0.259747	18.0384	2.6				162	0	FALSE	FALSE
Early	NS3	NS3_I63S	I	63	S	1	0.0501	0.0501	-2	-0.299955	-26.0803	-5.3	0.299955	26.0803	5.3				11	0	FALSE	FALSE
Early	NS3	NS3_K132I	K	132	I	2	0.127	0.127	-3	-0.999001	-15.0147	8.4	0.999001	15.0147	8.4				72	0	FALSE	FALSE
Early	NS3	NS3_K136I	K	136	I	1	0.0317	0.0317	-3	-0.999001	-15.0147	8.4	0.999001	15.0147	8.4				381	1	FALSE	FALSE
Early	NS3	NS3_K136S	K	136	S	3	0.0523	0.1069	0	-1.29896	-41.095	3.1	1.29896	41.095	3.1				0	0	FALSE	FALSE
Early	NS3	NS3_K21E	K	21	E	1	0.0377	0.0377	1	-1.91704	0.9417	0.4	1.91704	0.9417	0.4				761	1	FALSE	FALSE
Early	NS3	NS3_K21N	K	21	N	1	0.0552	0.0552	0	-0.999001	-14.0697	0.4	0.999001	14.0697	0.4				11941	18	FALSE	FALSE
Early	NS3	NS3_K21R	K	21	R	1	0.0552	0.0552	2	0.000989001	28.0134	-0.6	0.000989001	28.0134	0.6				403	1	FALSE	FALSE
Early	NS3	NS3_K235R	K	235	R	1	0.0341	0.0341	2	0.000989001	28.0134	-0.6	0.000989001	28.0134	0.6				163	0	FALSE	FALSE
Early	NS3	NS3_K61Q	K	61	Q	1	0.1007	0.1007	1	-0.999001	-0.0431	0.4	0.999001	0.0431	0.4				97	0	FALSE	FALSE
Early	NS3	NS3_K66Q	K	66	Q	1	0.127	0.127	1	-0.999001	-0.0431	0.4	0.999001	0.0431	0.4				184	0	FALSE	FALSE
Early	NS3	NS3_K67N	K	67	N	1	0.1396	0.1396	0	-0.999001	-14.0697	0.4	0.999001	14.0697	0.4				7824	57	TRUE	FALSE
Early	NS3	NS3_K67R	K	67	R	1	0.2018	0.2018	2	0.000989001	28.0134	-0.6	0.000989001	28.0134	0.6				672	0	FALSE	FALSE
Early	NS3	NS3_L106F	L	106	F	1	0.0381	0.0381	0	0	34.0162	-1	0	34.0162	1				57722	18	FALSE	FALSE
Early	NS3	NS3_L106I	L	106	I	5	0.0385	0.0568	2	0	0	0.7	0	0	0.7				1021	0	FALSE	FALSE
Early	NS3	NS3_L108P	L	108	P	1	0.0501	0.0501	-3	0.198427	-16.0424	-5.4	0.198427	16.0424	5.4				174	2	FALSE	FALSE
Early	NS3	NS3_L111V	L	111	V	1	0.0815	0.0815	1	-0.0261132	-14.0266	0.4	0.0261132	14.0266	0.4				16	1	FALSE	FALSE
Early	NS3	NS3_L115S	L	115	S	1	0.0477	0.0477	-2	-0.299955	-26.0803	-4.6	0.299955	26.0803	4.6				177	0	FALSE	FALSE
Early	NS3	NS3_L127F	L	127	F	8	0.0778	0.2176	0	0	34.0162	-1	0	34.0162	1				2611	3	FALSE	FALSE
Early	NS3	NS3_L129F	L	129	F	11	0.0612	0.1121	0	0	34.0162	-1	0	34.0162	1				2448	6	FALSE	FALSE
Early	NS3	NS3_L139F	L	139	F	1	0.0629	0.0629	0	0	34.0162	-1	0	34.0162	1				17	0	FALSE	FALSE
Early	NS3	NS3_L139I	L	139	I	2	0.0439	0.0439	2	0	0	0.7	0	0	0.7				65	1	FALSE	FALSE
Early	NS3	NS3_L139K	L	139	K	1	0.0348	0.0348	-2	0.999001	15.0147	-7.7	0.999001	15.0147	7.7				0	0	FALSE	FALSE
Early	NS3	NS3_L139Q	L	139	Q	1	0.1672	0.1672	-2	0	14.9716	-7.3	0	14.9716	7.3				0	0	FALSE	FALSE
Early	NS3	NS3_L139S	L	139	S	1	0.0732	0.0732	-2	-0.299955	-26.0803	-4.6	0.299955	26.0803	4.6				5	0	FALSE	FALSE
Early	NS3	NS3_L139T	L	139	T	1	0.3589	0.3589	-1	-0.361905	-12.0537	-4.5	0.361905	12.0537	4.5				4	0	FALSE	FALSE
Early	NS3	NS3_L140F	L	140	F	1	0.1	0.1	0	0	34.0162	-1	0	34.0162	1				70026	26	FALSE	FALSE
Early	NS3	NS3_L140H	L	140	H	1	0.2667	0.2667	-3	0.0871742	23.9817	-7	0.0871742	23.9817	7				2	0	FALSE	FALSE
Early	NS3	NS3_L140N	L	140	N	1	0.0762	0.0762	-3	0	0.945	-7.3	0	0.945	7.3				1	0	FALSE	FALSE
Early	NS3	NS3_L140S	L	140	S	1	0.0667	0.0667	-2	-0.299955	-26.0803	-4.6	0.299955	26.0803	4.6				0	0	FALSE	FALSE
Early	NS3	NS3_L147V	L	147	V	2	0.05295	0.07	1	-0.0261132	-14.0266	0.4	0.0261132	14.0266	0.4				135	0	FALSE	FALSE
Early	NS3	NS3_L219V	L	219	V	1	0.0405	0.0405	1	-0.0261132	-14.0266	0.4	0.0261132	14.0266	0.4				333	0	FALSE	FALSE
Early	NS3	NS3_L3S	L	3	S	1	0.0455	0.0455	-2	-0.299955	-26.0803	-4.6	0.299955	26.0803	4.6				34	0	FALSE	FALSE
Early	NS3	NS3_L41N	L	41	N	1	0.0479	0.0479	-3	0	0.945	-7.3	0	0.945	7.3				0	0	FALSE	FALSE
Early	NS3	NS3_L41P	L	41	P	1	0.0652	0.0652	-3	0.198427	-16.0424	-5.4	0.198427	16.0424	5.4				1580	3	FALSE	FALSE
Early	NS3	NS3_L46H	L	46	H	1	0.0564	0.0564	-3	0.0871742	23.9817	-7	0.0871742	23.9817	7				28	0	FALSE	FALSE
Early	NS3	NS3_L46P	L	46	P	1	0.1008	0.1008	-3	0.198427	-16.0424	-5.4	0.198427	16.0424	5.4				50	0	FALSE	FALSE
Early	NS3	NS3_L52F	L	52	F	1	0.0758	0.0758	0	0	34.0162	-1	0	34.0162	1				7972	9	FALSE	FALSE
Early	NS3	NS3_L53F	L	53	F	2	0.04925	0.0682	0	0	34.0162	-1	0	34.0162	1				11606	34	FALSE	FALSE
Early	NS3	NS3_L73I	L	73	I	2	0.282	0.2834	2	0	0	0.7	0	0	0.7				1183	1	FALSE	FALSE
Early	NS3	NS3_L95I	L	95	I	4	0.0609	0.0679	2	0	0	0.7	0	0	0.7				11	0	FALSE	FALSE
Early	NS3	NS3_L95K	L	95	K	2	0.0308	0.0314	-2	0.999001	15.0147	-7.7	0.999001	15.0147	7.7				2	0	FALSE	FALSE
Early	NS3	NS3_L95V	L	95	V	2	0.07365	0.0815	1	-0.0261132	-14.0266	0.4	0.0261132	14.0266	0.4				96	0	FALSE	FALSE
Early	NS3	NS3_L96F	L	96	F	2	0.0829	0.0932	0	0	34.0162	-1	0	34.0162	1				1359	2	FALSE	FALSE
Early	NS3	NS3_M125F	M	125	F	2	0.0725	0.0725	0	0.259747	15.9778	0.9	0.259747	15.9778	0.9				4	0	FALSE	FALSE
Early	NS3	NS3_M125I	M	125	I	1	0.9744	0.9744	1	0.259747	-18.0384	2.6	0.259747	18.0384	2.6				3391	10	FALSE	FALSE
Early	NS3	NS3_M1I	M	1	I	1	0.0408	0.0408	1	0.259747	-18.0384	2.6	0.259747	18.0384	2.6				332	1	FALSE	FALSE
Early	NS3	NS3_M260L	M	260	L	4	0.0343	0.072	2	0.259747	-18.0384	1.9	0.259747	18.0384	1.9				635	1	FALSE	FALSE
Early	NS3	NS3_M5I	M	5	I	2	0.0538	0.0769	1	0.259747	-18.0384	2.6	0.259747	18.0384	2.6				1343	7	FALSE	FALSE
Early	NS3	NS3_M5L	M	5	L	2	0.04	0.0473	2	0.259747	-18.0384	1.9	0.259747	18.0384	1.9				15	0	FALSE	FALSE
Early	NS3	NS3_M5T	M	5	T	3	0.0523	0.1065	-1	-0.102158	-30.0921	-2.6	0.102158	30.0921	2.6				1783	0	FALSE	FALSE
Early	NS3	NS3_N119L	N	119	L	1	0.0445	0.0445	-3	0	-0.945	7.3	0	0.945	7.3				8	0	FALSE	FALSE
Early	NS3	NS3_N119T	N	119	T	1	0.0737	0.0737	0	-0.361905	-12.9987	2.8	0.361905	12.9987	2.8				10	0	FALSE	FALSE
Early	NS3	NS3_N137H	N	137	H	3	0.0429	0.055	1	0.0871742	23.0367	0.3	0.0871742	23.0367	0.3				7	0	FALSE	FALSE
Early	NS3	NS3_N137I	N	137	I	1	0.0507	0.0507	-3	0	-0.945	8	0	0.945	8				297	0	FALSE	FALSE
Early	NS3	NS3_N144Y	N	144	Y	1	0.0649	0.0649	-2	-0.000999001	49.0706	2.2	0.000999001	49.0706	2.2				378	1	FALSE	FALSE
Early	NS3	NS3_N152T	N	152	T	1	0.0492	0.0492	0	-0.361905	-12.9987	2.8	0.361905	12.9987	2.8				45	0	FALSE	FALSE
Early	NS3	NS3_N161T	N	161	T	1	0.06	0.06	0	-0.361905	-12.9987	2.8	0.361905	12.9987	2.8				48	0	FALSE	FALSE
Early	NS3	NS3_N257I	N	257	I	1	0.0651	0.0651	-3	0	-0.945	8	0	0.945	8				40	0	FALSE	FALSE
Early	NS3	NS3_P138S	P	138	S	1	0.3087	0.3087	-1	-0.498382	-10.0379	0.8	0.498382	10.0379	0.8				10	0	FALSE	FALSE
Early	NS3	NS3_P138T	P	138	T	1	0.0508	0.0508	-1	-0.560332	3.9887	0.9	0.560332	3.9887	0.9				6	0	FALSE	FALSE
Early	NS3	NS3_P159G	P	159	G	1	0.0463	0.0463	-2	-0.198427	-40.0639	1.2	0.198427	40.0639	1.2				0	0	FALSE	FALSE
Early	NS3	NS3_P159S	P	159	S	1	0.0381	0.0381	-1	-0.498382	-10.0379	0.8	0.498382	10.0379	0.8				732	6	FALSE	FALSE
Early	NS3	NS3_P240L	P	240	L	1	0.0369	0.0369	-3	-0.198427	16.0424	5.4	0.198427	16.0424	5.4				19357	12	FALSE	FALSE
Early	NS3	NS3_P240S	P	240	S	1	0.0439	0.0439	-1	-0.498382	-10.0379	0.8	0.498382	10.0379	0.8				16270	5	FALSE	FALSE
Early	NS3	NS3_P25T	P	25	T	1	0.1145	0.1145	-1	-0.560332	3.9887	0.9	0.560332	3.9887	0.9				58	0	FALSE	FALSE
Early	NS3	NS3_P262S	P	262	S	1	0.0647	0.0647	-1	-0.498382	-10.0379	0.8	0.498382	10.0379	0.8				2879	5	FALSE	FALSE
Early	NS3	NS3_P262T	P	262	T	3	0.0366	0.0714	-1	-0.560332	3.9887	0.9	0.560332	3.9887	0.9				198	0	FALSE	FALSE
Early	NS3	NS3_Q116H	Q	116	H	1	0.049	0.049	0	0.0871742	9.0101	0.3	0.0871742	9.0101	0.3				1260	14	FALSE	FALSE
Early	NS3	NS3_Q17K	Q	17	K	1	0.031	0.031	1	0.999001	0.0431	-0.4	0.999001	0.0431	0.4				293	0	FALSE	FALSE
Early	NS3	NS3_Q185H	Q	185	H	3	0.9928	0.9933	0	0.0871742	9.0101	0.3	0.0871742	9.0101	0.3				21023	226	FALSE	FALSE
Early	NS3	NS3_Q218E	Q	218	E	2	0.0421	0.0457	2	-0.918037	0.9848	0	0.918037	0.9848	0				228	1	FALSE	FALSE
Early	NS3	NS3_Q245P	Q	245	P	1	0.0583	0.0583	-1	0.198427	-31.014	1.9	0.198427	31.014	1.9				24	1	FALSE	FALSE
Early	NS3	NS3_Q57N	Q	57	N	1	0.2241	0.2241	0	0	-14.0266	0	0	14.0266	0				49	0	FALSE	FALSE
Early	NS3	NS3_Q70V	Q	70	V	1	0.2529	0.2529	-2	-0.0261132	-28.9982	7.7	0.0261132	28.9982	7.7				0	0	FALSE	FALSE
Early	NS3	NS3_R122G	R	122	G	1	0.1451	0.1451	-2	-0.99999	-99.1344	4.1	0.99999	99.1344	4.1				376	0	FALSE	FALSE
Early	NS3	NS3_R122S	R	122	S	1	0.443	0.443	-1	-1.29995	-69.1084	3.7	1.29995	69.1084	3.7				506	0	FALSE	FALSE
Early	NS3	NS3_R126K	R	126	K	1	0.038	0.038	2	-0.000989001	-28.0134	0.6	0.000989001	28.0134	0.6				379	2	FALSE	FALSE
Early	NS3	NS3_R126Q	R	126	Q	2	0.1074	0.1074	1	-0.99999	-28.0565	1	0.99999	28.0565	1				4	0	FALSE	FALSE
Early	NS3	NS3_R134C	R	134	C	1	0.0617	0.0617	-3	-1.00989	-53.0428	7	1.00989	53.0428	7				4141	6	FALSE	FALSE
Early	NS3	NS3_R134G	R	134	G	1	0.0434	0.0434	-2	-0.99999	-99.1344	4.1	0.99999	99.1344	4.1				22	0	FALSE	FALSE
Early	NS3	NS3_R134H	R	134	H	1	0.0342	0.0342	0	-0.912816	-19.0464	1.3	0.912816	19.0464	1.3				2838	1	FALSE	FALSE
Early	NS3	NS3_R134L	R	134	L	1	0.0447	0.0447	-2	-0.99999	-43.0281	8.3	0.99999	43.0281	8.3				2744	17	FALSE	FALSE
Early	NS3	NS3_R134P	R	134	P	1	0.0671	0.0671	-2	-0.801563	-59.0705	2.9	0.801563	59.0705	2.9				40	1	FALSE	FALSE
Early	NS3	NS3_R134S	R	134	S	1	0.0907	0.0907	-1	-1.29995	-69.1084	3.7	1.29995	69.1084	3.7				440	0	FALSE	FALSE
Early	NS3	NS3_R134T	R	134	T	1	0.0381	0.0381	-1	-1.3619	-55.0818	3.8	1.3619	55.0818	3.8				6	0	FALSE	FALSE
Early	NS3	NS3_R30G	R	30	G	1	0.057	0.057	-2	-0.99999	-99.1344	4.1	0.99999	99.1344	4.1				33	0	FALSE	FALSE
Early	NS3	NS3_R30L	R	30	L	1	0.031	0.031	-2	-0.99999	-43.0281	8.3	0.99999	43.0281	8.3				1656	1	FALSE	FALSE
Early	NS3	NS3_R68C	R	68	C	1	0.1975	0.1975	-3	-1.00989	-53.0428	7	1.00989	53.0428	7				4	0	FALSE	FALSE
Early	NS3	NS3_R68L	R	68	L	1	0.0335	0.0335	-2	-0.99999	-43.0281	8.3	0.99999	43.0281	8.3				9	0	FALSE	FALSE
Early	NS3	NS3_S117L	S	117	L	1	0.0479	0.0479	-2	0.299955	26.0803	4.6	0.299955	26.0803	4.6				3	0	FALSE	FALSE
Early	NS3	NS3_S135H	S	135	H	1	0.0403	0.0403	-1	0.387129	50.062	-2.4	0.387129	50.062	2.4				2	0	FALSE	FALSE
Early	NS3	NS3_S135P	S	135	P	2	0.04795	0.0597	-1	0.498382	10.0379	-0.8	0.498382	10.0379	0.8				46	1	FALSE	FALSE
Early	NS3	NS3_S135T	S	135	T	1	0.0328	0.0328	1	-0.0619499	14.0266	0.1	0.0619499	14.0266	0.1				9	0	FALSE	FALSE
Early	NS3	NS3_S135Y	S	135	Y	1	0.1027	0.1027	-2	0.298956	76.0959	-0.5	0.298956	76.0959	0.5				3	0	FALSE	FALSE
Early	NS3	NS3_S162I	S	162	I	1	0.0607	0.0607	-2	0.299955	26.0803	5.3	0.299955	26.0803	5.3				84	0	FALSE	FALSE
Early	NS3	NS3_S162R	S	162	R	1	0.0369	0.0369	-1	1.29995	69.1084	-3.7	1.29995	69.1084	3.7				9	1	FALSE	FALSE
Early	NS3	NS3_S165F	S	165	F	1	0.0667	0.0667	-2	0.299955	60.0965	3.6	0.299955	60.0965	3.6				10800	12	FALSE	FALSE
Early	NS3	NS3_S165N	S	165	N	1	0.0698	0.0698	1	0.299955	27.0253	-2.7	0.299955	27.0253	2.7				2	0	FALSE	FALSE
Early	NS3	NS3_S165Y	S	165	Y	1	0.0971	0.0971	-2	0.298956	76.0959	-0.5	0.298956	76.0959	0.5				51	0	FALSE	FALSE
Early	NS3	NS3_S166T	S	166	T	1	0.1008	0.1008	1	-0.0619499	14.0266	0.1	0.0619499	14.0266	0.1				42	0	FALSE	FALSE
Early	NS3	NS3_S171G	S	171	G	1	0.0338	0.0338	0	0.299955	-30.026	0.4	0.299955	30.026	0.4				0	0	FALSE	FALSE
Early	NS3	NS3_S171I	S	171	I	6	0.0352	0.0863	-2	0.299955	26.0803	5.3	0.299955	26.0803	5.3				0	0	FALSE	FALSE
Early	NS3	NS3_S171L	S	171	L	1	0.7333	0.7333	-2	0.299955	26.0803	4.6	0.299955	26.0803	4.6				41245	68	FALSE	FALSE
Early	NS3	NS3_S177I	S	177	I	1	0.034	0.034	-2	0.299955	26.0803	5.3	0.299955	26.0803	5.3				1523	29	FALSE	FALSE
Early	NS3	NS3_S180F	S	180	F	1	0.0435	0.0435	-2	0.299955	60.0965	3.6	0.299955	60.0965	3.6				1367	2	FALSE	FALSE
Early	NS3	NS3_S195P	S	195	P	1	0.2552	0.2552	-1	0.498382	10.0379	-0.8	0.498382	10.0379	0.8				650	1	FALSE	FALSE
Early	NS3	NS3_S205I	S	205	I	1	0.0665	0.0665	-2	0.299955	26.0803	5.3	0.299955	26.0803	5.3				5	0	FALSE	FALSE
Early	NS3	NS3_S209P	S	209	P	16	0.06865	0.1638	-1	0.498382	10.0379	-0.8	0.498382	10.0379	0.8				10	0	FALSE	FALSE
Early	NS3	NS3_S26L	S	26	L	1	0.0679	0.0679	-2	0.299955	26.0803	4.6	0.299955	26.0803	4.6				1239522	21	TRUE	TRUE
Early	NS3	NS3_S272I	S	272	I	1	0.0362	0.0362	-2	0.299955	26.0803	5.3	0.299955	26.0803	5.3				259	0	FALSE	FALSE
Early	NS3	NS3_S40P	S	40	P	1	0.0887	0.0887	-1	0.498382	10.0379	-0.8	0.498382	10.0379	0.8				2992	2	FALSE	FALSE
Early	NS3	NS3_S60C	S	60	C	1	0.1212	0.1212	-1	0.290054	16.0656	3.3	0.290054	16.0656	3.3				65	1	FALSE	FALSE
Early	NS3	NS3_S60F	S	60	F	1	0.0993	0.0993	-2	0.299955	60.0965	3.6	0.299955	60.0965	3.6				7475	7	FALSE	FALSE
Early	NS3	NS3_S92L	S	92	L	1	0.0722	0.0722	-2	0.299955	26.0803	4.6	0.299955	26.0803	4.6				5903	7	FALSE	FALSE
Early	NS3	NS3_T12A	T	12	A	1	0.0836	0.0836	0	0.397678	-30.026	2.5	0.397678	30.026	2.5				171	0	FALSE	FALSE
Early	NS3	NS3_T14A	T	14	A	1	0.0692	0.0692	0	0.397678	-30.026	2.5	0.397678	30.026	2.5				89	0	FALSE	FALSE
Early	NS3	NS3_T14I	T	14	I	1	0.1465	0.1465	-1	0.361905	12.0537	5.2	0.361905	12.0537	5.2				6341	246	FALSE	FALSE
Early	NS3	NS3_T151I	T	151	I	1	0.0401	0.0401	-1	0.361905	12.0537	5.2	0.361905	12.0537	5.2				34285	33	FALSE	FALSE
Early	NS3	NS3_T151P	T	151	P	1	0.0552	0.0552	-1	0.560332	-3.9887	-0.9	0.560332	3.9887	0.9				47	0	FALSE	FALSE
Early	NS3	NS3_T164H	T	164	H	1	0.0463	0.0463	-2	0.449079	36.0354	-2.5	0.449079	36.0354	2.5				0	0	FALSE	FALSE
Early	NS3	NS3_T164P	T	164	P	1	0.0498	0.0498	-1	0.560332	-3.9887	-0.9	0.560332	3.9887	0.9				6	0	FALSE	FALSE
Early	NS3	NS3_T164R	T	164	R	1	0.1014	0.1014	-1	1.3619	55.0818	-3.8	1.3619	55.0818	3.8				0	0	FALSE	FALSE
Early	NS3	NS3_T170P	T	170	P	1	0.0708	0.0708	-1	0.560332	-3.9887	-0.9	0.560332	3.9887	0.9				9	0	FALSE	FALSE
Early	NS3	NS3_T176P	T	176	P	1	0.0612	0.0612	-1	0.560332	-3.9887	-0.9	0.560332	3.9887	0.9				39	0	FALSE	FALSE
Early	NS3	NS3_T217I	T	217	I	5	0.0457	0.0754	-1	0.361905	12.0537	5.2	0.361905	12.0537	5.2				2785	6	FALSE	FALSE
Early	NS3	NS3_T229A	T	229	A	2	0.1963	0.1963	0	0.397678	-30.026	2.5	0.397678	30.026	2.5				196	0	FALSE	FALSE
Early	NS3	NS3_T229I	T	229	I	1	0.0599	0.0599	-1	0.361905	12.0537	5.2	0.361905	12.0537	5.2				30955	2	FALSE	FALSE
Early	NS3	NS3_T229S	T	229	S	1	0.116	0.116	1	0.0619499	-14.0266	-0.1	0.0619499	14.0266	0.1				306	0	FALSE	FALSE
Early	NS3	NS3_T24A	T	24	A	1	0.1504	0.1504	0	0.397678	-30.026	2.5	0.397678	30.026	2.5				96	0	FALSE	FALSE
Early	NS3	NS3_T268S	T	268	S	6	0.05775	0.1192	1	0.0619499	-14.0266	-0.1	0.0619499	14.0266	0.1				20	0	FALSE	FALSE
Early	NS3	NS3_T269M	T	269	M	1	0.7828	0.7828	-1	0.102158	30.0921	2.6	0.102158	30.0921	2.6				4673	5	FALSE	FALSE
Early	NS3	NS3_T270Y	T	270	Y	1	0.0321	0.0321	-2	0.360906	62.0693	-0.6	0.360906	62.0693	0.6				0	0	FALSE	FALSE
Early	NS3	NS3_T271I	T	271	I	2	0.03485	0.0362	-1	0.361905	12.0537	5.2	0.361905	12.0537	5.2				1572	9	FALSE	FALSE
Early	NS3	NS3_T32S	T	32	S	1	0.0859	0.0859	1	0.0619499	-14.0266	-0.1	0.0619499	14.0266	0.1				172	0	FALSE	FALSE
Early	NS3	NS3_T89I	T	89	I	1	0.0548	0.0548	-1	0.361905	12.0537	5.2	0.361905	12.0537	5.2				22577	28	FALSE	FALSE
Early	NS3	NS3_V112F	V	112	F	1	0.0541	0.0541	-1	0.0261132	48.0428	-1.4	0.0261132	48.0428	1.4				7842	8	FALSE	FALSE
Early	NS3	NS3_V121A	V	121	A	1	0.126	0.126	0	0.0618862	-28.0531	-2.4	0.0618862	28.0531	2.4				280	1	FALSE	FALSE
Early	NS3	NS3_V13L	V	13	L	1	0.0479	0.0479	1	0.0261132	14.0266	-0.4	0.0261132	14.0266	0.4				14650	558	FALSE	FALSE
Early	NS3	NS3_V163F	V	163	F	1	0.0368	0.0368	-1	0.0261132	48.0428	-1.4	0.0261132	48.0428	1.4				2	0	FALSE	FALSE
Early	NS3	NS3_V202I	V	202	I	1	0.0365	0.0365	3	0.0261132	14.0266	0.3	0.0261132	14.0266	0.3				1479	1	FALSE	FALSE
Early	NS3	NS3_V225I	V	225	I	1	0.0537	0.0537	3	0.0261132	14.0266	0.3	0.0261132	14.0266	0.3				644	0	FALSE	FALSE
Early	NS3	NS3_V237D	V	237	D	1	0.1207	0.1207	-3	-0.969585	15.9564	-7.7	0.969585	15.9564	7.7				2	0	FALSE	FALSE
Early	NS3	NS3_V237G	V	237	G	1	0.0381	0.0381	-3	0.0261132	-42.0797	-4.6	0.0261132	42.0797	4.6				9	0	FALSE	FALSE
Early	NS3	NS3_V244A	V	244	A	1	0.0902	0.0902	0	0.0618862	-28.0531	-2.4	0.0618862	28.0531	2.4				309	0	FALSE	FALSE
Early	NS3	NS3_V255I	V	255	I	1	0.0332	0.0332	3	0.0261132	14.0266	0.3	0.0261132	14.0266	0.3				191	0	FALSE	FALSE
Early	NS3	NS3_V256G	V	256	G	1	0.0333	0.0333	-3	0.0261132	-42.0797	-4.6	0.0261132	42.0797	4.6				5	0	FALSE	FALSE
Early	NS3	NS3_V259L	V	259	L	3	0.0341	0.0732	1	0.0261132	14.0266	-0.4	0.0261132	14.0266	0.4				5191	10	FALSE	FALSE
Early	NS3	NS3_V48G	V	48	G	1	0.0324	0.0324	-3	0.0261132	-42.0797	-4.6	0.0261132	42.0797	4.6				87	2	FALSE	FALSE
Early	NS3	NS3_V55A	V	55	A	1	0.2254	0.2254	0	0.0618862	-28.0531	-2.4	0.0618862	28.0531	2.4				539	0	FALSE	FALSE
Early	NS3	NS3_V77F	V	77	F	1	0.4628	0.4628	-1	0.0261132	48.0428	-1.4	0.0261132	48.0428	1.4				10732	14	FALSE	FALSE
Early	NS3	NS3_V80A	V	80	A	1	0.0667	0.0667	0	0.0618862	-28.0531	-2.4	0.0618862	28.0531	2.4				446	0	FALSE	FALSE
Early	NS3	NS3_V88A	V	88	A	1	0.999	0.999	0	0.0618862	-28.0531	-2.4	0.0618862	28.0531	2.4				339	33	FALSE	FALSE
Early	NS3	NS3_V90G	V	90	G	1	0.0359	0.0359	-3	0.0261132	-42.0797	-4.6	0.0261132	42.0797	4.6				11	0	FALSE	FALSE
Early	NS3	NS3_W128C	W	128	C	1	0.0521	0.0521	-2	-0.00990099	-83.067	3.4	0.00990099	83.067	3.4				1642	5	FALSE	FALSE
Early	NS3	NS3_W131C	W	131	C	5	0.0645	0.1101	-2	-0.00990099	-83.067	3.4	0.00990099	83.067	3.4				40031	32	FALSE	FALSE
Early	NS3	NS3_W131S	W	131	S	1	0.1464	0.1464	-3	-0.299955	-99.1326	0.1	0.299955	99.1326	0.1				630	3	FALSE	FALSE
Early	NS3	NS3_W149C	W	149	C	1	0.0312	0.0312	-2	-0.00990099	-83.067	3.4	0.00990099	83.067	3.4				2639	2	FALSE	FALSE
Early	NS3	NS3_W45P	W	45	P	1	0.0536	0.0536	-4	0.198427	-89.0947	-0.7	0.198427	89.0947	0.7				4	0	FALSE	FALSE
Early	NS3	NS3_W69C	W	69	C	1	0.0594	0.0594	-2	-0.00990099	-83.067	3.4	0.00990099	83.067	3.4				6811	5	FALSE	FALSE
Early	NS3	NS3_Y145D	Y	145	D	1	0.0319	0.0319	-3	-0.994699	-48.0858	-2.2	0.994699	48.0858	2.2				0	0	FALSE	FALSE
Early	NS3	NS3_Y145L	Y	145	L	2	0.0507	0.0536	-1	0.000999001	-50.0156	5.1	0.000999001	50.0156	5.1				11	0	FALSE	FALSE
Early	NS3	NS3_Y154N	Y	154	N	1	0.1883	0.1883	-2	0.000999001	-49.0706	-2.2	0.000999001	49.0706	2.2				174	2	FALSE	FALSE
Early	NS3	NS3_Y160D	Y	160	D	1	0.0302	0.0302	-3	-0.994699	-48.0858	-2.2	0.994699	48.0858	2.2				0	0	FALSE	FALSE
Early	NS3	NS3_Y160H	Y	160	H	1	0.034	0.034	2	0.0881732	-26.0339	-1.9	0.0881732	26.0339	1.9				144	0	FALSE	FALSE
Early	NS3	NS3_Y184H	Y	184	H	1	0.0365	0.0365	2	0.0881732	-26.0339	-1.9	0.0881732	26.0339	1.9				1219	2	FALSE	FALSE
Early	NS3	NS3_Y189H	Y	189	H	1	0.0415	0.0415	2	0.0881732	-26.0339	-1.9	0.0881732	26.0339	1.9				226	2	FALSE	FALSE
Early	NS3	NS3_Y189N	Y	189	N	1	0.034	0.034	-2	0.000999001	-49.0706	-2.2	0.000999001	49.0706	2.2				1	0	FALSE	FALSE
Early	NS3	NS3_Y206S	Y	206	S	17	0.065	0.1425	-2	-0.298956	-76.0959	0.5	0.298956	76.0959	0.5				9	0	FALSE	FALSE
Early	NS3	NS3_Y264P	Y	264	P	12	0.03705	0.069	-3	0.199426	-66.058	-0.3	0.199426	66.058	0.3				0	0	FALSE	FALSE
Early	NS6	NS6_D30V	D	30	V	1	0.0357	0.0357	-3	0.969585	-15.9564	7.7	0.969585	15.9564	7.7				7	0	FALSE	FALSE
Early	NS6	NS6_D53G	D	53	G	1	0.0463	0.0463	-1	0.995698	-58.0361	3.1	0.995698	58.0361	3.1				283	1	FALSE	FALSE
Early	NS6	NS6_E54K	E	54	K	1	0.0506	0.0506	1	1.91704	-0.9417	-0.4	1.91704	0.9417	0.4				128	0	FALSE	FALSE
Early	NS6	NS6_E55G	E	55	G	2	0.0579	0.0579	-2	0.918037	-72.0627	3.1	0.918037	72.0627	3.1				176	0	FALSE	FALSE
Early	NS6	NS6_E55N	E	55	N	4	0.04315	0.0777	0	0.918037	-15.0114	0	0.918037	15.0114	0				7	0	FALSE	FALSE
Early	NS6	NS6_E59D	E	59	D	1	0.0423	0.0423	2	-0.0776616	-14.0266	0	0.0776616	14.0266	0				916	1	FALSE	FALSE
Early	NS6	NS6_E59Y	E	59	Y	2	0.0485	0.0485	-2	0.917038	34.0592	2.2	0.917038	34.0592	2.2				0	0	FALSE	FALSE
Early	NS6	NS6_F22L	F	22	L	1	0.1896	0.1896	0	0	-34.0162	1	0	34.0162	1				481	1	FALSE	FALSE
Early	NS6	NS6_F2L	F	2	L	1	0.1412	0.1412	0	0	-34.0162	1	0	34.0162	1				572	1	FALSE	FALSE
Early	NS6	NS6_F7L	F	7	L	1	0.2102	0.2102	0	0	-34.0162	1	0	34.0162	1				2064	0	FALSE	FALSE
Early	NS6	NS6_F7S	F	7	S	1	0.1138	0.1138	-2	-0.299955	-60.0965	-3.6	0.299955	60.0965	3.6				101	0	FALSE	FALSE
Early	NS6	NS6_F7Y	F	7	Y	4	0.0531	0.06	3	-0.000999001	15.9994	-4.1	0.000999001	15.9994	4.1				234	0	FALSE	FALSE
Early	NS6	NS6_I11T	I	11	T	1	0.0326	0.0326	-1	-0.361905	-12.0537	-5.2	0.361905	12.0537	5.2				240	7	FALSE	FALSE
Early	NS6	NS6_I11V	I	11	V	5	0.0492	0.0635	3	-0.0261132	-14.0266	-0.3	0.0261132	14.0266	0.3				177	0	FALSE	FALSE
Early	NS6	NS6_I17F	I	17	F	1	0.0949	0.0949	0	0	34.0162	-1.7	0	34.0162	1.7				83	0	FALSE	FALSE
Early	NS6	NS6_I26N	I	26	N	2	0.21075	0.3768	-3	0	0.945	-8	0	0.945	8				30	0	FALSE	FALSE
Early	NS6	NS6_I26S	I	26	S	1	0.0569	0.0569	-2	-0.299955	-26.0803	-5.3	0.299955	26.0803	5.3				20	0	FALSE	FALSE
Early	NS6	NS6_I33F	I	33	F	8	0.0801	0.1039	0	0	34.0162	-1.7	0	34.0162	1.7				18	0	FALSE	FALSE
Early	NS6	NS6_I33L	I	33	L	1	0.0387	0.0387	2	0	0	-0.7	0	0	0.7				801	2	FALSE	FALSE
Early	NS6	NS6_K42Q	K	42	Q	1	0.0355	0.0355	1	-0.999001	-0.0431	0.4	0.999001	0.0431	0.4				3	0	FALSE	FALSE
Early	NS6	NS6_L29E	L	29	E	1	0.0411	0.0411	-3	-0.918037	15.9564	-7.3	0.918037	15.9564	7.3				3	0	FALSE	FALSE
Early	NS6	NS6_L29F	L	29	F	1	0.1336	0.1336	0	0	34.0162	-1	0	34.0162	1				1065	0	FALSE	FALSE
Early	NS6	NS6_L29I	L	29	I	1	0.0311	0.0311	2	0	0	0.7	0	0	0.7				336	0	FALSE	FALSE
Early	NS6	NS6_L40S	L	40	S	1	0.0823	0.0823	-2	-0.299955	-26.0803	-4.6	0.299955	26.0803	4.6				154	0	FALSE	FALSE
Early	NS6	NS6_L44V	L	44	V	1	0.0436	0.0436	1	-0.0261132	-14.0266	0.4	0.0261132	14.0266	0.4				3	0	FALSE	FALSE
Early	NS6	NS6_L4R	L	4	R	1	0.0384	0.0384	-2	0.99999	43.0281	-8.3	0.99999	43.0281	8.3				103	0	FALSE	FALSE
Early	NS6	NS6_L52S	L	52	S	1	0.112	0.112	-2	-0.299955	-26.0803	-4.6	0.299955	26.0803	4.6				89	1	FALSE	FALSE
Early	NS6	NS6_M19T	M	19	T	1	0.0402	0.0402	-1	-0.102158	-30.0921	-2.6	0.102158	30.0921	2.6				183	0	FALSE	FALSE
Early	NS6	NS6_M58I	M	58	I	18	0.06205	0.1289	1	0.259747	-18.0384	2.6	0.259747	18.0384	2.6				540	1	FALSE	FALSE
Early	NS6	NS6_M58L	M	58	L	26	0.04125	0.1423	2	0.259747	-18.0384	1.9	0.259747	18.0384	1.9				877	0	FALSE	FALSE
Early	NS6	NS6_M58T	M	58	T	1	0.0423	0.0423	-1	-0.102158	-30.0921	-2.6	0.102158	30.0921	2.6				314	0	FALSE	FALSE
Early	NS6	NS6_N28Y	N	28	Y	1	0.0533	0.0533	-2	-0.000999001	49.0706	2.2	0.000999001	49.0706	2.2				49	0	FALSE	FALSE
Early	NS6	NS6_N39Y	N	39	Y	1	0.0324	0.0324	-2	-0.000999001	49.0706	2.2	0.000999001	49.0706	2.2				66	0	FALSE	FALSE
Early	NS6	NS6_P57L	P	57	L	2	0.0518	0.0581	-3	-0.198427	16.0424	5.4	0.198427	16.0424	5.4				11910	20	FALSE	FALSE
Early	NS6	NS6_Q56L	Q	56	L	1	0.0388	0.0388	-2	0	-14.9716	7.3	0	14.9716	7.3				181	0	FALSE	FALSE
Early	NS6	NS6_Q8H	Q	8	H	4	0.05165	0.1795	0	0.0871742	9.0101	0.3	0.0871742	9.0101	0.3				255	5	FALSE	FALSE
Early	NS6	NS6_S43L	S	43	L	1	0.0376	0.0376	-2	0.299955	26.0803	4.6	0.299955	26.0803	4.6				37	0	FALSE	FALSE
Early	NS6	NS6_S50F	S	50	F	2	0.9978	1	-2	0.299955	60.0965	3.6	0.299955	60.0965	3.6				358	2	FALSE	FALSE
Early	NS6	NS6_T10N	T	10	N	1	0.693	0.693	0	0.361905	12.9987	-2.8	0.361905	12.9987	2.8				598	1	FALSE	FALSE
Early	NS6	NS6_T10V	T	10	V	1	0.0619	0.0619	0	0.335792	-1.9729	4.9	0.335792	1.9729	4.9				2	0	FALSE	FALSE
Early	NS6	NS6_T45S	T	45	S	1	0.0778	0.0778	1	0.0619499	-14.0266	-0.1	0.0619499	14.0266	0.1				24	0	FALSE	FALSE
Early	NS6	NS6_V5F	V	5	F	1	0.097	0.097	-1	0.0261132	48.0428	-1.4	0.0261132	48.0428	1.4				1362	9	FALSE	FALSE
Early	NS6	NS6_W27L	W	27	L	1	0.0637	0.0637	-2	0	-73.0523	4.7	0	73.0523	4.7				5369	38	FALSE	FALSE
Early	NS6	NS6_W27Y	W	27	Y	1	0.0349	0.0349	2	-0.000999001	-23.0367	-0.4	0.000999001	23.0367	0.4				287	0	FALSE	FALSE
Early	NS6	NS6_Y31F	Y	31	F	1	0.037	0.037	3	0.000999001	-15.9994	4.1	0.000999001	15.9994	4.1				536	1	FALSE	FALSE
Early	NS6	NS6_Y31L	Y	31	L	1	0.034	0.034	-1	0.000999001	-50.0156	5.1	0.000999001	50.0156	5.1				13	0	FALSE	FALSE
Early	NS7a	NS7a_A105V	A	105	V	1	0.0846	0.0846	0	-0.0618862	28.0531	2.4	0.0618862	28.0531	2.4				7560	11	FALSE	FALSE
Early	NS7a	NS7a_A106T	A	106	T	1	0.0808	0.0808	0	-0.397678	30.026	-2.5	0.397678	30.026	2.5				618	0	FALSE	FALSE
Early	NS7a	NS7a_A13V	A	13	V	2	0.7721	0.8276	0	-0.0618862	28.0531	2.4	0.0618862	28.0531	2.4				47676	6	TRUE	FALSE
Early	NS7a	NS7a_A55V	A	55	V	1	0.0331	0.0331	0	-0.0618862	28.0531	2.4	0.0618862	28.0531	2.4				1992	1	FALSE	FALSE
Early	NS7a	NS7a_A66S	A	66	S	1	0.051	0.051	1	-0.335728	15.9994	-2.6	0.335728	15.9994	2.6				2097	0	FALSE	FALSE
Early	NS7a	NS7a_A79D	A	79	D	1	0.0352	0.0352	-2	-1.03147	44.0095	-5.3	1.03147	44.0095	5.3				7081	2	FALSE	FALSE
Early	NS7a	NS7a_A8E	A	8	E	2	0.20345	0.213	-1	-0.95381	58.0361	-5.3	0.95381	58.0361	5.3				71	0	FALSE	FALSE
Early	NS7a	NS7a_A8T	A	8	T	1	0.1496	0.1496	0	-0.397678	30.026	-2.5	0.397678	30.026	2.5				3383	3	FALSE	FALSE
Early	NS7a	NS7a_A8V	A	8	V	2	0.72185	0.7394	0	-0.0618862	28.0531	2.4	0.0618862	28.0531	2.4				2024	4	FALSE	FALSE
Early	NS7a	NS7a_C15R	C	15	R	3	0.2969	0.549	-3	1.00989	53.0428	-7	1.00989	53.0428	7				81	0	FALSE	FALSE
Early	NS7a	NS7a_C15S	C	15	S	3	0.1822	0.2813	-1	-0.290054	-16.0656	-3.3	0.290054	16.0656	3.3				256	0	FALSE	FALSE
Early	NS7a	NS7a_C23T	C	23	T	2	0.043	0.043	-1	-0.352004	-2.039	-3.2	0.352004	2.039	3.2				1	0	FALSE	FALSE
Early	NS7a	NS7a_C67S	C	67	S	1	0.057	0.057	-1	-0.290054	-16.0656	-3.3	0.290054	16.0656	3.3				136	0	FALSE	FALSE
Early	NS7a	NS7a_D51E	D	51	E	1	0.0322	0.0322	2	0.0776616	14.0266	0	0.0776616	14.0266	0				27	0	FALSE	FALSE
Early	NS7a	NS7a_E16A	E	16	A	3	0.2523	0.2981	-1	0.95381	-58.0361	5.3	0.95381	58.0361	5.3				88	1	FALSE	FALSE
Early	NS7a	NS7a_E16D	E	16	D	3	0.1269	0.1532	2	-0.0776616	-14.0266	0	0.0776616	14.0266	0				769	15	FALSE	FALSE
Early	NS7a	NS7a_E16G	E	16	G	3	0.0901	0.1822	-2	0.918037	-72.0627	3.1	0.918037	72.0627	3.1				814	0	FALSE	FALSE
Early	NS7a	NS7a_E22D	E	22	D	2	0.0418	0.0418	2	-0.0776616	-14.0266	0	0.0776616	14.0266	0				4486	1	FALSE	FALSE
Early	NS7a	NS7a_E41G	E	41	G	7	0.0395	0.0641	-2	0.918037	-72.0627	3.1	0.918037	72.0627	3.1				177	1	FALSE	FALSE
Early	NS7a	NS7a_E91D	E	91	D	3	0.6509	0.921	2	-0.0776616	-14.0266	0	0.0776616	14.0266	0				1956	1	FALSE	FALSE
Early	NS7a	NS7a_E92A	E	92	A	3	0.6695	0.9225	-1	0.95381	-58.0361	5.3	0.95381	58.0361	5.3				38	0	FALSE	FALSE
Early	NS7a	NS7a_E92D	E	92	D	1	0.035	0.035	2	-0.0776616	-14.0266	0	0.0776616	14.0266	0				3258	4	FALSE	FALSE
Early	NS7a	NS7a_F101I	F	101	I	1	0.1013	0.1013	0	0	-34.0162	1.7	0	34.0162	1.7				109	0	FALSE	FALSE
Early	NS7a	NS7a_F101Y	F	101	Y	1	0.0495	0.0495	3	-0.000999001	15.9994	-4.1	0.000999001	15.9994	4.1				243	0	FALSE	FALSE
Early	NS7a	NS7a_F109L	F	109	L	5	0.0418	0.0517	0	0	-34.0162	1	0	34.0162	1				7148	2	FALSE	FALSE
Early	NS7a	NS7a_F54I	F	54	I	1	0.0303	0.0303	0	0	-34.0162	1.7	0	34.0162	1.7				512	2	FALSE	FALSE
Early	NS7a	NS7a_F63N	F	63	N	1	0.0327	0.0327	-3	0	-33.0712	-6.3	0	33.0712	6.3				5	0	FALSE	FALSE
Early	NS7a	NS7a_F65L	F	65	L	1	0.0545	0.0545	0	0	-34.0162	1	0	34.0162	1				3545	8	FALSE	FALSE
Early	NS7a	NS7a_F65S	F	65	S	1	0.0508	0.0508	-2	-0.299955	-60.0965	-3.6	0.299955	60.0965	3.6				174	0	FALSE	FALSE
Early	NS7a	NS7a_F6L	F	6	L	2	0.7973	0.8016	0	0	-34.0162	1	0	34.0162	1				3445	0	FALSE	FALSE
Early	NS7a	NS7a_F6Y	F	6	Y	2	0.161	0.1633	3	-0.000999001	15.9994	-4.1	0.000999001	15.9994	4.1				42	0	FALSE	FALSE
Early	NS7a	NS7a_G26S	G	26	S	1	0.0413	0.0413	0	-0.299955	30.026	-0.4	0.299955	30.026	0.4				754	0	FALSE	FALSE
Early	NS7a	NS7a_G42A	G	42	A	1	0.0379	0.0379	0	0.035773	14.0266	2.2	0.035773	14.0266	2.2				31	0	FALSE	FALSE
Early	NS7a	NS7a_G42V	G	42	V	1	0.0536	0.0536	-3	-0.0261132	42.0797	4.6	0.0261132	42.0797	4.6				141	0	FALSE	FALSE
Early	NS7a	NS7a_H19A	H	19	A	2	0.4363	0.6823	-2	-0.0514012	-66.0614	5	0.0514012	66.0614	5				0	0	FALSE	FALSE
Early	NS7a	NS7a_H19R	H	19	R	1	0.0512	0.0512	0	0.912816	19.0464	-1.3	0.912816	19.0464	1.3				64	0	FALSE	FALSE
Early	NS7a	NS7a_H47Y	H	47	Y	1	0.0644	0.0644	2	-0.0881732	26.0339	1.9	0.0881732	26.0339	1.9				68776	12	FALSE	FALSE
Early	NS7a	NS7a_I100T	I	100	T	1	0.0963	0.0963	-1	-0.361905	-12.0537	-5.2	0.361905	12.0537	5.2				1044	1	FALSE	FALSE
Early	NS7a	NS7a_I100V	I	100	V	1	0.057	0.057	3	-0.0261132	-14.0266	-0.3	0.0261132	14.0266	0.3				362	1	FALSE	FALSE
Early	NS7a	NS7a_I103T	I	103	T	2	0.0575	0.0635	-1	-0.361905	-12.0537	-5.2	0.361905	12.0537	5.2				204	0	FALSE	FALSE
Early	NS7a	NS7a_I103V	I	103	V	1	0.0991	0.0991	3	-0.0261132	-14.0266	-0.3	0.0261132	14.0266	0.3				390	0	FALSE	FALSE
Early	NS7a	NS7a_I4M	I	4	M	2	0.0784	0.0885	1	-0.259747	18.0384	-2.6	0.259747	18.0384	2.6				165	0	FALSE	FALSE
Early	NS7a	NS7a_I88F	I	88	F	2	0.2288	0.391	0	0	34.0162	-1.7	0	34.0162	1.7				194	0	FALSE	FALSE
Early	NS7a	NS7a_I88K	I	88	K	1	0.0677	0.0677	-3	0.999001	15.0147	-8.4	0.999001	15.0147	8.4				13	0	FALSE	FALSE
Early	NS7a	NS7a_I88P	I	88	P	2	0.2366	0.4048	-3	0.198427	-16.0424	-6.1	0.198427	16.0424	6.1				1	0	FALSE	FALSE
Early	NS7a	NS7a_K2I	K	2	I	1	0.0305	0.0305	-3	-0.999001	-15.0147	8.4	0.999001	15.0147	8.4				51	0	FALSE	FALSE
Early	NS7a	NS7a_K2N	K	2	N	2	0.0558	0.0558	0	-0.999001	-14.0697	0.4	0.999001	14.0697	0.4				111	0	FALSE	FALSE
Early	NS7a	NS7a_K2Y	K	2	Y	3	0.0363	0.0546	-2	-1	35.0009	2.6	1	35.0009	2.6				1	0	FALSE	FALSE
Early	NS7a	NS7a_L102H	L	102	H	1	0.0326	0.0326	-3	0.0871742	23.9817	-7	0.0871742	23.9817	7				131	0	FALSE	FALSE
Early	NS7a	NS7a_L102P	L	102	P	1	0.1001	0.1001	-3	0.198427	-16.0424	-5.4	0.198427	16.0424	5.4				312	0	FALSE	FALSE
Early	NS7a	NS7a_L102Q	L	102	Q	1	0.0741	0.0741	-2	0	14.9716	-7.3	0	14.9716	7.3				2	0	FALSE	FALSE
Early	NS7a	NS7a_L12H	L	12	H	1	0.037	0.037	-3	0.0871742	23.9817	-7	0.0871742	23.9817	7				88	0	FALSE	FALSE
Early	NS7a	NS7a_L17A	L	17	A	2	0.0894	0.1431	-1	0.035773	-42.0797	-2	0.035773	42.0797	2				4	0	FALSE	FALSE
Early	NS7a	NS7a_L17P	L	17	P	2	0.12425	0.1987	-3	0.198427	-16.0424	-5.4	0.198427	16.0424	5.4				224	0	FALSE	FALSE
Early	NS7a	NS7a_L17R	L	17	R	2	0.3338	0.4665	-2	0.99999	43.0281	-8.3	0.99999	43.0281	8.3				108	0	FALSE	FALSE
Early	NS7a	NS7a_L5P	L	5	P	1	0.0934	0.0934	-3	0.198427	-16.0424	-5.4	0.198427	16.0424	5.4				2149	1	FALSE	FALSE
Early	NS7a	NS7a_L5V	L	5	V	2	0.92495	0.9277	1	-0.0261132	-14.0266	0.4	0.0261132	14.0266	0.4				117	0	FALSE	FALSE
Early	NS7a	NS7a_L7E	L	7	E	2	0.86275	0.875	-3	-0.918037	15.9564	-7.3	0.918037	15.9564	7.3				0	0	FALSE	FALSE
Early	NS7a	NS7a_L7F	L	7	F	1	0.0446	0.0446	0	0	34.0162	-1	0	34.0162	1				244	2	FALSE	FALSE
Early	NS7a	NS7a_L7T	L	7	T	2	0.07495	0.0963	-1	-0.361905	-12.0537	-4.5	0.361905	12.0537	4.5				1	0	FALSE	FALSE
Early	NS7a	NS7a_L9Q	L	9	Q	2	0.6081	0.6122	-2	0	14.9716	-7.3	0	14.9716	7.3				58	0	FALSE	FALSE
Early	NS7a	NS7a_M1I	M	1	I	17	0.0525	0.1355	1	0.259747	-18.0384	2.6	0.259747	18.0384	2.6				487	1	FALSE	FALSE
Early	NS7a	NS7a_M1T	M	1	T	1	0.097	0.097	-1	-0.102158	-30.0921	-2.6	0.102158	30.0921	2.6				0	0	FALSE	FALSE
Early	NS7a	NS7a_N43D	N	43	D	5	0.0328	0.039	1	-0.995698	0.9848	0	0.995698	0.9848	0				192	0	FALSE	FALSE
Early	NS7a	NS7a_N43I	N	43	I	1	0.0663	0.0663	-3	0	-0.945	8	0	0.945	8				172	0	FALSE	FALSE
Early	NS7a	NS7a_N43K	N	43	K	1	0.0962	0.0962	0	0.999001	14.0697	-0.4	0.999001	14.0697	0.4				200	0	FALSE	FALSE
Early	NS7a	NS7a_N43R	N	43	R	1	0.044	0.044	0	0.99999	42.0831	-1	0.99999	42.0831	1				3	0	FALSE	FALSE
Early	NS7a	NS7a_N43S	N	43	S	3	0.0434	0.0544	1	-0.299955	-27.0253	2.7	0.299955	27.0253	2.7				386	0	FALSE	FALSE
Early	NS7a	NS7a_N43T	N	43	T	1	0.1922	0.1922	0	-0.361905	-12.9987	2.8	0.361905	12.9987	2.8				221	0	FALSE	FALSE
Early	NS7a	NS7a_N43Y	N	43	Y	2	0.0411	0.0457	-2	-0.000999001	49.0706	2.2	0.000999001	49.0706	2.2				728	0	FALSE	FALSE
Early	NS7a	NS7a_P34S	P	34	S	2	0.2706	0.4957	-1	-0.498382	-10.0379	0.8	0.498382	10.0379	0.8				9134	5	FALSE	FALSE
Early	NS7a	NS7a_P68L	P	68	L	1	0.0533	0.0533	-3	-0.198427	16.0424	5.4	0.198427	16.0424	5.4				851	2	FALSE	FALSE
Early	NS7a	NS7a_P84R	P	84	R	2	0.0382	0.0383	-2	0.801563	59.0705	-2.9	0.801563	59.0705	2.9				237	0	FALSE	FALSE
Early	NS7a	NS7a_P84S	P	84	S	1	0.037	0.037	-1	-0.498382	-10.0379	0.8	0.498382	10.0379	0.8				7282	7	FALSE	FALSE
Early	NS7a	NS7a_P99Q	P	99	Q	1	0.1119	0.1119	-1	-0.198427	31.014	-1.9	0.198427	31.014	1.9				840	1	FALSE	FALSE
Early	NS7a	NS7a_Q21G	Q	21	G	2	0.0852	0.0852	-2	0	-71.0779	3.1	0	71.0779	3.1				0	0	FALSE	FALSE
Early	NS7a	NS7a_Q21H	Q	21	H	2	0.2425	0.3686	0	0.0871742	9.0101	0.3	0.0871742	9.0101	0.3				211	0	FALSE	FALSE
Early	NS7a	NS7a_Q62H	Q	62	H	1	0.0471	0.0471	0	0.0871742	9.0101	0.3	0.0871742	9.0101	0.3				10362	6	FALSE	FALSE
Early	NS7a	NS7a_Q90A	Q	90	A	2	0.2527	0.3583	-1	0.035773	-57.0513	5.3	0.035773	57.0513	5.3				0	0	FALSE	FALSE
Early	NS7a	NS7a_Q90P	Q	90	P	2	0.3785	0.5378	-1	0.198427	-31.014	1.9	0.198427	31.014	1.9				21	1	FALSE	FALSE
Early	NS7a	NS7a_Q94E	Q	94	E	3	0.7945	0.9657	2	-0.918037	0.9848	0	0.918037	0.9848	0				145	0	FALSE	FALSE
Early	NS7a	NS7a_R118K	R	118	K	1	0.0307	0.0307	2	-0.000989001	-28.0134	0.6	0.000989001	28.0134	0.6				3375	8	FALSE	FALSE
Early	NS7a	NS7a_R80K	R	80	K	1	0.0456	0.0456	2	-0.000989001	-28.0134	0.6	0.000989001	28.0134	0.6				891	1	FALSE	FALSE
Early	NS7a	NS7a_R89G	R	89	G	3	0.1393	0.4724	-2	-0.99999	-99.1344	4.1	0.99999	99.1344	4.1				76	0	FALSE	FALSE
Early	NS7a	NS7a_R89S	R	89	S	14	0.0651	0.1155	-1	-1.29995	-69.1084	3.7	1.29995	69.1084	3.7				144	0	FALSE	FALSE
Early	NS7a	NS7a_R89T	R	89	T	1	0.0804	0.0804	-1	-1.3619	-55.0818	3.8	1.3619	55.0818	3.8				424	0	FALSE	FALSE
Early	NS7a	NS7a_S37T	S	37	T	1	0.0334	0.0334	1	-0.0619499	14.0266	0.1	0.0619499	14.0266	0.1				52	0	FALSE	FALSE
Early	NS7a	NS7a_S44A	S	44	A	1	0.0807	0.0807	1	0.335728	-15.9994	2.6	0.335728	15.9994	2.6				176	0	FALSE	FALSE
Early	NS7a	NS7a_S44P	S	44	P	1	0.2027	0.2027	-1	0.498382	10.0379	-0.8	0.498382	10.0379	0.8				1264	1	FALSE	FALSE
Early	NS7a	NS7a_S44T	S	44	T	1	0.1285	0.1285	1	-0.0619499	14.0266	0.1	0.0619499	14.0266	0.1				360	0	FALSE	FALSE
Early	NS7a	NS7a_S83A	S	83	A	1	0.0354	0.0354	1	0.335728	-15.9994	2.6	0.335728	15.9994	2.6				343	1	FALSE	FALSE
Early	NS7a	NS7a_S83T	S	83	T	1	0.041	0.041	1	-0.0619499	14.0266	0.1	0.0619499	14.0266	0.1				420	0	FALSE	FALSE
Early	NS7a	NS7a_S98A	S	98	A	1	0.0652	0.0652	1	0.335728	-15.9994	2.6	0.335728	15.9994	2.6				512	0	FALSE	FALSE
Early	NS7a	NS7a_S98I	S	98	I	1	0.0989	0.0989	-2	0.299955	26.0803	5.3	0.299955	26.0803	5.3				10	0	FALSE	FALSE
Early	NS7a	NS7a_S98P	S	98	P	1	0.0707	0.0707	-1	0.498382	10.0379	-0.8	0.498382	10.0379	0.8				829	0	FALSE	FALSE
Early	NS7a	NS7a_S98T	S	98	T	1	0.2405	0.2405	1	-0.0619499	14.0266	0.1	0.0619499	14.0266	0.1				143	0	FALSE	FALSE
Early	NS7a	NS7a_T14A	T	14	A	1	0.0714	0.0714	0	0.397678	-30.026	2.5	0.397678	30.026	2.5				71	0	FALSE	FALSE
Early	NS7a	NS7a_T14E	T	14	E	3	0.1978	0.2597	-1	-0.556132	28.0101	-2.8	0.556132	28.0101	2.8				0	0	FALSE	FALSE
Early	NS7a	NS7a_T14I	T	14	I	2	0.1762	0.2639	-1	0.361905	12.0537	5.2	0.361905	12.0537	5.2				17232	18	FALSE	FALSE
Early	NS7a	NS7a_T14R	T	14	R	1	0.0311	0.0311	-1	1.3619	55.0818	-3.8	1.3619	55.0818	3.8				0	0	FALSE	FALSE
Early	NS7a	NS7a_T39G	T	39	G	21	0.0762	0.1523	-2	0.361905	-44.0526	0.3	0.361905	44.0526	0.3				1	0	FALSE	FALSE
Early	NS7a	NS7a_T39I	T	39	I	19	0.0558	0.0996	-1	0.361905	12.0537	5.2	0.361905	12.0537	5.2				13086	10	FALSE	FALSE
Early	NS7a	NS7a_T57A	T	57	A	1	0.0419	0.0419	0	0.397678	-30.026	2.5	0.397678	30.026	2.5				179	0	FALSE	FALSE
Early	NS7a	NS7a_T61I	T	61	I	1	0.0321	0.0321	-1	0.361905	12.0537	5.2	0.361905	12.0537	5.2				5134	4	FALSE	FALSE
Early	NS7a	NS7a_V104A	V	104	A	1	0.1004	0.1004	0	0.0618862	-28.0531	-2.4	0.0618862	28.0531	2.4				255	1	FALSE	FALSE
Early	NS7a	NS7a_V108L	V	108	L	1	0.0499	0.0499	1	0.0261132	14.0266	-0.4	0.0261132	14.0266	0.4				625	3	FALSE	FALSE
Early	NS7a	NS7a_V82N	V	82	N	3	0.047	0.0496	-3	0.0261132	14.9716	-7.7	0.0261132	14.9716	7.7				7	0	FALSE	FALSE
Early	NS7a	NS7a_V93D	V	93	D	3	0.1758	0.1791	-3	-0.969585	15.9564	-7.7	0.969585	15.9564	7.7				6	2	FALSE	FALSE
Early	NS7a	NS7a_V93G	V	93	G	3	0.5821	0.7759	-3	0.0261132	-42.0797	-4.6	0.0261132	42.0797	4.6				36	0	FALSE	FALSE
Early	NS7a	NS7a_Y18A	Y	18	A	1	0.0964	0.0964	-2	0.036772	-92.0953	3.1	0.036772	92.0953	3.1				0	0	FALSE	FALSE
Early	NS7a	NS7a_Y18C	Y	18	C	2	0.1191	0.2066	-2	-0.00890199	-60.0303	3.8	0.00890199	60.0303	3.8				155	0	FALSE	FALSE
Early	NS7a	NS7a_Y18P	Y	18	P	2	0.3455	0.5075	-3	0.199426	-66.058	-0.3	0.199426	66.058	0.3				0	0	FALSE	FALSE
Early	NS7a	NS7a_Y20N	Y	20	N	1	0.0675	0.0675	-2	0.000999001	-49.0706	-2.2	0.000999001	49.0706	2.2				218	0	FALSE	FALSE
Early	NS7a	NS7a_Y20R	Y	20	R	2	0.47465	0.7584	-2	1.00099	-6.9875	-3.2	1.00099	6.9875	3.2				1	0	FALSE	FALSE
Early	NS7a	NS7a_Y97C	Y	97	C	1	0.0559	0.0559	-2	-0.00890199	-60.0303	3.8	0.00890199	60.0303	3.8				381	0	FALSE	FALSE
Early	NS7a	NS7a_Y97N	Y	97	N	1	0.0677	0.0677	-2	0.000999001	-49.0706	-2.2	0.000999001	49.0706	2.2				39	0	FALSE	FALSE
Early	NS7b	NS7b_A15D	A	15	D	1	0.0365	0.0365	-2	-1.03147	44.0095	-5.3	1.03147	44.0095	5.3				78	0	FALSE	FALSE
Early	NS7b	NS7b_A15N	A	15	N	1	0.0367	0.0367	-2	-0.035773	43.0247	-5.3	0.035773	43.0247	5.3				8	0	FALSE	FALSE
Early	NS7b	NS7b_A15S	A	15	S	1	0.1765	0.1765	1	-0.335728	15.9994	-2.6	0.335728	15.9994	2.6				13678	7	FALSE	FALSE
Early	NS7b	NS7b_A15T	A	15	T	8	0.0616	0.0723	0	-0.397678	30.026	-2.5	0.397678	30.026	2.5				256	1	FALSE	FALSE
Early	NS7b	NS7b_C12A	C	12	A	1	0.0717	0.0717	0	0.045674	-32.065	-0.7	0.045674	32.065	0.7				47	0	FALSE	FALSE
Early	NS7b	NS7b_C12G	C	12	G	3	0.1007	0.326	-3	0.00990099	-46.0916	-2.9	0.00990099	46.0916	2.9				9	0	FALSE	FALSE
Early	NS7b	NS7b_C12H	C	12	H	1	0.2522	0.2522	-3	0.0970752	33.9964	-5.7	0.0970752	33.9964	5.7				0	0	FALSE	FALSE
Early	NS7b	NS7b_C12N	C	12	N	9	0.0605	0.1795	-3	0.00990099	10.9597	-6	0.00990099	10.9597	6				7	0	FALSE	FALSE
Early	NS7b	NS7b_C12S	C	12	S	1	0.2017	0.2017	-1	-0.290054	-16.0656	-3.3	0.290054	16.0656	3.3				33	0	FALSE	FALSE
Early	NS7b	NS7b_C12T	C	12	T	2	0.40665	0.6642	-1	-0.352004	-2.039	-3.2	0.352004	2.039	3.2				30	0	FALSE	FALSE
Early	NS7b	NS7b_C41K	C	41	K	2	0.03535	0.0355	-3	1.0089	25.0294	-6.4	1.0089	25.0294	6.4				0	0	FALSE	FALSE
Early	NS7b	NS7b_D36C	D	36	C	1	0.1257	0.1257	-3	0.985797	-11.9445	6	0.985797	11.9445	6				0	0	FALSE	FALSE
Early	NS7b	NS7b_D36E	D	36	E	1	0.3661	0.3661	2	0.0776616	14.0266	0	0.0776616	14.0266	0				153	0	FALSE	FALSE
Early	NS7b	NS7b_D36L	D	36	L	1	0.035	0.035	-4	0.995698	-1.9298	7.3	0.995698	1.9298	7.3				0	0	FALSE	FALSE
Early	NS7b	NS7b_D36R	D	36	R	1	0.0547	0.0547	-2	1.99569	41.0983	-1	1.99569	41.0983	1				1	0	FALSE	FALSE
Early	NS7b	NS7b_D8E	D	8	E	1	0.0822	0.0822	2	0.0776616	14.0266	0	0.0776616	14.0266	0				111	0	FALSE	FALSE
Early	NS7b	NS7b_D8N	D	8	N	1	0.9908	0.9908	1	0.995698	-0.9848	0	0.995698	0.9848	0				317	1	FALSE	FALSE
Early	NS7b	NS7b_D8S	D	8	S	1	0.2443	0.2443	0	0.695743	-28.0101	2.7	0.695743	28.0101	2.7				7	0	FALSE	FALSE
Early	NS7b	NS7b_E33G	E	33	G	1	0.0674	0.0674	-2	0.918037	-72.0627	3.1	0.918037	72.0627	3.1				504	0	FALSE	FALSE
Early	NS7b	NS7b_E33H	E	33	H	1	0.3284	0.3284	0	1.00521	8.0253	0.3	1.00521	8.0253	0.3				3	0	FALSE	FALSE
Early	NS7b	NS7b_E33V	E	33	V	1	0.5196	0.5196	-2	0.891923	-29.983	7.7	0.891923	29.983	7.7				1277	0	FALSE	FALSE
Early	NS7b	NS7b_E39G	E	39	G	1	0.1282	0.1282	-2	0.918037	-72.0627	3.1	0.918037	72.0627	3.1				206	0	FALSE	FALSE
Early	NS7b	NS7b_E39K	E	39	K	1	0.5299	0.5299	1	1.91704	-0.9417	-0.4	1.91704	0.9417	0.4				322	2	FALSE	FALSE
Early	NS7b	NS7b_F13D	F	13	D	4	0.09385	0.2784	-3	-0.995698	-32.0864	-6.3	0.995698	32.0864	6.3				0	0	FALSE	FALSE
Early	NS7b	NS7b_F13H	F	13	H	5	0.0449	0.0636	-1	0.0871742	-10.0345	-6	0.0871742	10.0345	6				0	0	FALSE	FALSE
Early	NS7b	NS7b_F13I	F	13	I	17	0.0697	0.1189	0	0	-34.0162	1.7	0	34.0162	1.7				30	0	FALSE	FALSE
Early	NS7b	NS7b_F13L	F	13	L	12	0.05575	0.4183	0	0	-34.0162	1	0	34.0162	1				2280	1	FALSE	FALSE
Early	NS7b	NS7b_F13N	F	13	N	2	0.0434	0.0529	-3	0	-33.0712	-6.3	0	33.0712	6.3				0	0	FALSE	FALSE
Early	NS7b	NS7b_F13P	F	13	P	3	0.0383	0.0814	-4	0.198427	-50.0586	-4.4	0.198427	50.0586	4.4				0	0	FALSE	FALSE
Early	NS7b	NS7b_F13R	F	13	R	2	0.1287	0.1702	-3	0.99999	9.0119	-7.3	0.99999	9.0119	7.3				1	0	FALSE	FALSE
Early	NS7b	NS7b_F13S	F	13	S	2	0.0411	0.0419	-2	-0.299955	-60.0965	-3.6	0.299955	60.0965	3.6				643	1	FALSE	FALSE
Early	NS7b	NS7b_F13V	F	13	V	1	0.3228	0.3228	-1	-0.0261132	-48.0428	1.4	0.0261132	48.0428	1.4				32	0	FALSE	FALSE
Early	NS7b	NS7b_F13Y	F	13	Y	2	0.0558	0.0564	3	-0.000999001	15.9994	-4.1	0.000999001	15.9994	4.1				27	0	FALSE	FALSE
Early	NS7b	NS7b_F16C	F	16	C	1	0.0354	0.0354	-2	-0.00990099	-44.0309	-0.3	0.00990099	44.0309	0.3				269	0	FALSE	FALSE
Early	NS7b	NS7b_F16I	F	16	I	2	0.0453	0.0522	0	0	-34.0162	1.7	0	34.0162	1.7				506	0	FALSE	FALSE
Early	NS7b	NS7b_F28L	F	28	L	1	0.0401	0.0401	0	0	-34.0162	1	0	34.0162	1				534	0	FALSE	FALSE
Early	NS7b	NS7b_F9A	F	9	A	1	0.0633	0.0633	-2	0.035773	-76.0959	-1	0.035773	76.0959	1				0	0	FALSE	FALSE
Early	NS7b	NS7b_F9L	F	9	L	3	0.0533	0.3025	0	0	-34.0162	1	0	34.0162	1				246	2	FALSE	FALSE
Early	NS7b	NS7b_F9N	F	9	N	2	0.05825	0.0861	-3	0	-33.0712	-6.3	0	33.0712	6.3				0	0	FALSE	FALSE
Early	NS7b	NS7b_F9R	F	9	R	1	0.2571	0.2571	-3	0.99999	9.0119	-7.3	0.99999	9.0119	7.3				4	0	FALSE	FALSE
Early	NS7b	NS7b_F9Y	F	9	Y	2	0.10565	0.1557	3	-0.000999001	15.9994	-4.1	0.000999001	15.9994	4.1				17	0	FALSE	FALSE
Early	NS7b	NS7b_H37F	H	37	F	1	0.0769	0.0769	-1	-0.0871742	10.0345	6	0.0871742	10.0345	6				0	0	FALSE	FALSE
Early	NS7b	NS7b_H37L	H	37	L	1	0.1185	0.1185	-3	-0.0871742	-23.9817	7	0.0871742	23.9817	7				1977	5	FALSE	FALSE
Early	NS7b	NS7b_H37P	H	37	P	1	0.0383	0.0383	-2	0.111253	-40.0241	1.6	0.111253	40.0241	1.6				24	0	FALSE	FALSE
Early	NS7b	NS7b_H37Q	H	37	Q	3	0.0675	0.4406	0	-0.0871742	-9.0101	-0.3	0.0871742	9.0101	0.3				23	0	FALSE	FALSE
Early	NS7b	NS7b_H42D	H	42	D	1	0.0597	0.0597	-1	-1.08287	-22.0519	-0.3	1.08287	22.0519	0.3				50	0	FALSE	FALSE
Early	NS7b	NS7b_H42L	H	42	L	1	0.0376	0.0376	-3	-0.0871742	-23.9817	7	0.0871742	23.9817	7				39	0	FALSE	FALSE
Early	NS7b	NS7b_H42Q	H	42	Q	4	0.039	0.0501	0	-0.0871742	-9.0101	-0.3	0.0871742	9.0101	0.3				2170	0	FALSE	FALSE
Early	NS7b	NS7b_H42R	H	42	R	2	0.0367	0.0417	0	0.912816	19.0464	-1.3	0.912816	19.0464	1.3				601	1	FALSE	FALSE
Early	NS7b	NS7b_I26M	I	26	M	1	0.0402	0.0402	1	-0.259747	18.0384	-2.6	0.259747	18.0384	2.6				17	0	FALSE	FALSE
Early	NS7b	NS7b_I26V	I	26	V	1	0.0415	0.0415	3	-0.0261132	-14.0266	-0.3	0.0261132	14.0266	0.3				1014	0	FALSE	FALSE
Early	NS7b	NS7b_I27F	I	27	F	1	0.0311	0.0311	0	0	34.0162	-1.7	0	34.0162	1.7				126	0	FALSE	FALSE
Early	NS7b	NS7b_I27T	I	27	T	1	0.1801	0.1801	-1	-0.361905	-12.0537	-5.2	0.361905	12.0537	5.2				761	0	FALSE	FALSE
Early	NS7b	NS7b_I2C	I	2	C	1	0.0452	0.0452	-1	-0.00990099	-10.0147	-2	0.00990099	10.0147	2				0	0	FALSE	FALSE
Early	NS7b	NS7b_I2N	I	2	N	2	0.06825	0.0802	-3	0	0.945	-8	0	0.945	8				856	4	FALSE	FALSE
Early	NS7b	NS7b_I7N	I	7	N	1	0.2534	0.2534	-3	0	0.945	-8	0	0.945	8				63	0	FALSE	FALSE
Early	NS7b	NS7b_I7T	I	7	T	3	0.127	0.9911	-1	-0.361905	-12.0537	-5.2	0.361905	12.0537	5.2				192	1	FALSE	FALSE
Early	NS7b	NS7b_L11F	L	11	F	1	0.0714	0.0714	0	0	34.0162	-1	0	34.0162	1				89659	6	TRUE	FALSE
Early	NS7b	NS7b_L11K	L	11	K	3	0.0833	0.1445	-2	0.999001	15.0147	-7.7	0.999001	15.0147	7.7				2	0	FALSE	FALSE
Early	NS7b	NS7b_L11M	L	11	M	1	0.4624	0.4624	2	-0.259747	18.0384	-1.9	0.259747	18.0384	1.9				18	0	FALSE	FALSE
Early	NS7b	NS7b_L11Q	L	11	Q	2	0.12345	0.2148	-2	0	14.9716	-7.3	0	14.9716	7.3				0	0	FALSE	FALSE
Early	NS7b	NS7b_L11R	L	11	R	1	0.0381	0.0381	-2	0.99999	43.0281	-8.3	0.99999	43.0281	8.3				0	0	FALSE	FALSE
Early	NS7b	NS7b_L11S	L	11	S	2	0.044	0.0476	-2	-0.299955	-26.0803	-4.6	0.299955	26.0803	4.6				163	0	FALSE	FALSE
Early	NS7b	NS7b_L11V	L	11	V	1	0.0404	0.0404	1	-0.0261132	-14.0266	0.4	0.0261132	14.0266	0.4				326	0	FALSE	FALSE
Early	NS7b	NS7b_L11W	L	11	W	1	0.0636	0.0636	-2	0	73.0523	-4.7	0	73.0523	4.7				22	0	FALSE	FALSE
Early	NS7b	NS7b_L14E	L	14	E	2	0.0818	0.0818	-3	-0.918037	15.9564	-7.3	0.918037	15.9564	7.3				0	0	FALSE	FALSE
Early	NS7b	NS7b_L14I	L	14	I	3	0.1091	0.2035	2	0	0	0.7	0	0	0.7				96	0	FALSE	FALSE
Early	NS7b	NS7b_L14K	L	14	K	1	0.0361	0.0361	-2	0.999001	15.0147	-7.7	0.999001	15.0147	7.7				0	0	FALSE	FALSE
Early	NS7b	NS7b_L14Q	L	14	Q	4	0.0483	0.0641	-2	0	14.9716	-7.3	0	14.9716	7.3				2	0	FALSE	FALSE
Early	NS7b	NS7b_L14S	L	14	S	3	0.0636	0.0636	-2	-0.299955	-26.0803	-4.6	0.299955	26.0803	4.6				1335	0	FALSE	FALSE
Early	NS7b	NS7b_L14T	L	14	T	1	0.0433	0.0433	-1	-0.361905	-12.0537	-4.5	0.361905	12.0537	4.5				17	0	FALSE	FALSE
Early	NS7b	NS7b_L20I	L	20	I	1	0.0722	0.0722	2	0	0	0.7	0	0	0.7				208	0	FALSE	FALSE
Early	NS7b	NS7b_L20P	L	20	P	1	0.1209	0.1209	-3	0.198427	-16.0424	-5.4	0.198427	16.0424	5.4				68	0	FALSE	FALSE
Early	NS7b	NS7b_L22I	L	22	I	1	0.0428	0.0428	2	0	0	0.7	0	0	0.7				60	0	FALSE	FALSE
Early	NS7b	NS7b_L25I	L	25	I	1	0.0344	0.0344	2	0	0	0.7	0	0	0.7				800	0	FALSE	FALSE
Early	NS7b	NS7b_L32F	L	32	F	2	0.31135	0.3236	0	0	34.0162	-1	0	34.0162	1				6277	7	FALSE	FALSE
Early	NS7b	NS7b_L32R	L	32	R	2	0.2622	0.4866	-2	0.99999	43.0281	-8.3	0.99999	43.0281	8.3				23	0	FALSE	FALSE
Early	NS7b	NS7b_L34M	L	34	M	1	0.0445	0.0445	2	-0.259747	18.0384	-1.9	0.259747	18.0384	1.9				958	0	FALSE	FALSE
Early	NS7b	NS7b_L34V	L	34	V	1	0.4764	0.4764	1	-0.0261132	-14.0266	0.4	0.0261132	14.0266	0.4				20	0	FALSE	FALSE
Early	NS7b	NS7b_L6G	L	6	G	1	0.0452	0.0452	-4	0	-56.1063	-4.2	0	56.1063	4.2				1	0	FALSE	FALSE
Early	NS7b	NS7b_M1I	M	1	I	2	0.0694	0.0784	1	0.259747	-18.0384	2.6	0.259747	18.0384	2.6				2061	5	FALSE	FALSE
Early	NS7b	NS7b_N38I	N	38	I	1	0.0866	0.0866	-3	0	-0.945	8	0	0.945	8				209	0	FALSE	FALSE
Early	NS7b	NS7b_N38T	N	38	T	2	0.268	0.4882	0	-0.361905	-12.9987	2.8	0.361905	12.9987	2.8				24	0	FALSE	FALSE
Early	NS7b	NS7b_Q35K	Q	35	K	2	0.08415	0.1257	1	0.999001	0.0431	-0.4	0.999001	0.0431	0.4				244	0	FALSE	FALSE
Early	NS7b	NS7b_Q35L	Q	35	L	1	0.5082	0.5082	-2	0	-14.9716	7.3	0	14.9716	7.3				204	0	FALSE	FALSE
Early	NS7b	NS7b_Q35N	Q	35	N	1	0.3607	0.3607	0	0	-14.0266	0	0	14.0266	0				33	0	FALSE	FALSE
Early	NS7b	NS7b_Q35S	Q	35	S	1	0.0562	0.0562	0	-0.299955	-41.0519	2.7	0.299955	41.0519	2.7				1	0	FALSE	FALSE
Early	NS7b	NS7b_S31I	S	31	I	1	0.0312	0.0312	-2	0.299955	26.0803	5.3	0.299955	26.0803	5.3				0	0	FALSE	FALSE
Early	NS7b	NS7b_S31L	S	31	L	1	0.9678	0.9678	-2	0.299955	26.0803	4.6	0.299955	26.0803	4.6				7425	49	FALSE	FALSE
Early	NS7b	NS7b_S31P	S	31	P	1	0.0316	0.0316	-1	0.498382	10.0379	-0.8	0.498382	10.0379	0.8				310	0	FALSE	FALSE
Early	NS7b	NS7b_S5T	S	5	T	1	0.0801	0.0801	1	-0.0619499	14.0266	0.1	0.0619499	14.0266	0.1				93	0	FALSE	FALSE
Early	NS7b	NS7b_T40I	T	40	I	2	0.08895	0.1171	-1	0.361905	12.0537	5.2	0.361905	12.0537	5.2				1087413	30	TRUE	TRUE
Early	NS7b	NS7b_T40S	T	40	S	1	0.0419	0.0419	1	0.0619499	-14.0266	-0.1	0.0619499	14.0266	0.1				137	0	FALSE	FALSE
Early	NS7b	NS7b_W29L	W	29	L	3	0.0432	0.1853	-2	0	-73.0523	4.7	0	73.0523	4.7				1045	0	FALSE	FALSE
Early	NS7b	NS7b_W29Q	W	29	Q	1	0.0334	0.0334	-2	0	-58.0807	-2.6	0	58.0807	2.6				8	0	FALSE	FALSE
Early	NS7b	NS7b_Y10D	Y	10	D	3	0.0583	0.0673	-3	-0.994699	-48.0858	-2.2	0.994699	48.0858	2.2				2	0	FALSE	FALSE
Early	NS7b	NS7b_Y10E	Y	10	E	1	0.213	0.213	-2	-0.917038	-34.0592	-2.2	0.917038	34.0592	2.2				1	0	FALSE	FALSE
Early	NS7b	NS7b_Y10H	Y	10	H	1	0.1724	0.1724	2	0.0881732	-26.0339	-1.9	0.0881732	26.0339	1.9				411	0	FALSE	FALSE
Early	NS7b	NS7b_Y10K	Y	10	K	5	0.0793	0.25	-2	1	-35.0009	-2.6	1	35.0009	2.6				0	0	FALSE	FALSE
Early	NS7b	NS7b_Y10N	Y	10	N	2	0.2526	0.4621	-2	0.000999001	-49.0706	-2.2	0.000999001	49.0706	2.2				4	0	FALSE	FALSE
Early	NS7b	NS7b_Y10P	Y	10	P	2	0.06265	0.0929	-3	0.199426	-66.058	-0.3	0.199426	66.058	0.3				1	0	FALSE	FALSE
Early	NS7b	NS7b_Y10Q	Y	10	Q	1	0.0469	0.0469	-1	0.000999001	-35.044	-2.2	0.000999001	35.044	2.2				2	0	FALSE	FALSE
Early	NS8	NS8_A51S	A	51	S	1	0.0327	0.0327	1	-0.335728	15.9994	-2.6	0.335728	15.9994	2.6				9200	3	FALSE	FALSE
Early	NS8	NS8_A55T	A	55	T	1	0.0518	0.0518	0	-0.397678	30.026	-2.5	0.397678	30.026	2.5				1005	0	FALSE	FALSE
Early	NS8	NS8_A55V	A	55	V	1	0.0698	0.0698	0	-0.0618862	28.0531	2.4	0.0618862	28.0531	2.4				3994	4	FALSE	FALSE
Early	NS8	NS8_A65V	A	65	V	2	0.06455	0.0805	0	-0.0618862	28.0531	2.4	0.0618862	28.0531	2.4				30782	20	FALSE	FALSE
Early	NS8	NS8_C102G	C	102	G	1	0.0321	0.0321	-3	0.00990099	-46.0916	-2.9	0.00990099	46.0916	2.9				15	0	FALSE	FALSE
Early	NS8	NS8_C25F	C	25	F	1	0.0348	0.0348	-2	0.00990099	44.0309	0.3	0.00990099	44.0309	0.3				1978	3	FALSE	FALSE
Early	NS8	NS8_C37S	C	37	S	1	0.0511	0.0511	-1	-0.290054	-16.0656	-3.3	0.290054	16.0656	3.3				320	0	FALSE	FALSE
Early	NS8	NS8_C37Y	C	37	Y	8	0.0348	0.0418	-2	0.00890199	60.0303	-3.8	0.00890199	60.0303	3.8				157	0	FALSE	FALSE
Early	NS8	NS8_C83F	C	83	F	1	0.0482	0.0482	-2	0.00990099	44.0309	0.3	0.00990099	44.0309	0.3				935	0	FALSE	FALSE
Early	NS8	NS8_C90S	C	90	S	1	0.0954	0.0954	-1	-0.290054	-16.0656	-3.3	0.290054	16.0656	3.3				129	0	FALSE	FALSE
Early	NS8	NS8_D107G	D	107	G	1	0.0307	0.0307	-1	0.995698	-58.0361	3.1	0.995698	58.0361	3.1				71	0	FALSE	FALSE
Early	NS8	NS8_D107Y	D	107	Y	2	0.0355	0.0407	-3	0.994699	48.0858	2.2	0.994699	48.0858	2.2				166	2	FALSE	FALSE
Early	NS8	NS8_D113H	D	113	H	2	0.036	0.0417	-1	1.08287	22.0519	0.3	1.08287	22.0519	0.3				17	1	FALSE	FALSE
Early	NS8	NS8_D113N	D	113	N	36	0.05885	0.1287	1	0.995698	-0.9848	0	0.995698	0.9848	0				15	0	FALSE	FALSE
Early	NS8	NS8_D119E	D	119	E	8	0.05675	0.0952	2	0.0776616	14.0266	0	0.0776616	14.0266	0				1187	10	FALSE	FALSE
Early	NS8	NS8_D34H	D	34	H	1	0.0301	0.0301	-1	1.08287	22.0519	0.3	1.08287	22.0519	0.3				705	0	FALSE	FALSE
Early	NS8	NS8_D34N	D	34	N	2	0.0386	0.046	1	0.995698	-0.9848	0	0.995698	0.9848	0				306	1	FALSE	FALSE
Early	NS8	NS8_D35V	D	35	V	1	0.0326	0.0326	-3	0.969585	-15.9564	7.7	0.969585	15.9564	7.7				51	0	FALSE	FALSE
Early	NS8	NS8_D63H	D	63	H	1	0.0396	0.0396	-1	1.08287	22.0519	0.3	1.08287	22.0519	0.3				16	0	FALSE	FALSE
Early	NS8	NS8_D63Y	D	63	Y	1	0.0369	0.0369	-3	0.994699	48.0858	2.2	0.994699	48.0858	2.2				1237	3	FALSE	FALSE
Early	NS8	NS8_E106K	E	106	K	1	0.033	0.033	1	1.91704	-0.9417	-0.4	1.91704	0.9417	0.4				159	1	FALSE	FALSE
Early	NS8	NS8_E19A	E	19	A	1	0.0652	0.0652	-1	0.95381	-58.0361	5.3	0.95381	58.0361	5.3				68	0	FALSE	FALSE
Early	NS8	NS8_E19D	E	19	D	1	0.0569	0.0569	2	-0.0776616	-14.0266	0	0.0776616	14.0266	0				196	0	FALSE	FALSE
Early	NS8	NS8_E19H	E	19	H	1	0.0335	0.0335	0	1.00521	8.0253	0.3	1.00521	8.0253	0.3				2	0	FALSE	FALSE
Early	NS8	NS8_E19K	E	19	K	1	0.0335	0.0335	1	1.91704	-0.9417	-0.4	1.91704	0.9417	0.4				249	0	FALSE	FALSE
Early	NS8	NS8_E19L	E	19	L	1	0.067	0.067	-3	0.918037	-15.9564	7.3	0.918037	15.9564	7.3				10	0	FALSE	FALSE
Early	NS8	NS8_E19P	E	19	P	1	0.0485	0.0485	-1	1.11646	-31.9988	1.9	1.11646	31.9988	1.9				1	0	FALSE	FALSE
Early	NS8	NS8_E19Q	E	19	Q	1	0.0519	0.0519	2	0.918037	-0.9848	0	0.918037	0.9848	0				373	0	FALSE	FALSE
Early	NS8	NS8_E19R	E	19	R	1	0.0435	0.0435	0	1.91803	27.0717	-1	1.91803	27.0717	1				3	0	FALSE	FALSE
Early	NS8	NS8_E19S	E	19	S	1	0.052	0.052	0	0.618082	-42.0367	2.7	0.618082	42.0367	2.7				38	0	FALSE	FALSE
Early	NS8	NS8_E19T	E	19	T	1	0.0368	0.0368	-1	0.556132	-28.0101	2.8	0.556132	28.0101	2.8				3	0	FALSE	FALSE
Early	NS8	NS8_E19V	E	19	V	1	0.0486	0.0486	-2	0.891923	-29.983	7.7	0.891923	29.983	7.7				20	0	FALSE	FALSE
Early	NS8	NS8_E19Y	E	19	Y	1	0.0335	0.0335	-2	0.917038	34.0592	2.2	0.917038	34.0592	2.2				0	0	FALSE	FALSE
Early	NS8	NS8_E59G	E	59	G	1	0.031	0.031	-2	0.918037	-72.0627	3.1	0.918037	72.0627	3.1				227	0	FALSE	FALSE
Early	NS8	NS8_F104L	F	104	L	2	0.054	0.0718	0	0	-34.0162	1	0	34.0162	1				409	1	FALSE	FALSE
Early	NS8	NS8_F120N	F	120	N	8	0.05485	0.0952	-3	0	-33.0712	-6.3	0	33.0712	6.3				0	0	FALSE	FALSE
Early	NS8	NS8_F120V	F	120	V	1	0.1768	0.1768	-1	-0.0261132	-48.0428	1.4	0.0261132	48.0428	1.4				8611	11	FALSE	FALSE
Early	NS8	NS8_F16V	F	16	V	1	0.0502	0.0502	-1	-0.0261132	-48.0428	1.4	0.0261132	48.0428	1.4				91	0	FALSE	FALSE
Early	NS8	NS8_F3I	F	3	I	1	0.0909	0.0909	0	0	-34.0162	1.7	0	34.0162	1.7				152	1	FALSE	FALSE
Early	NS8	NS8_F3Y	F	3	Y	1	0.0442	0.0442	3	-0.000999001	15.9994	-4.1	0.000999001	15.9994	4.1				3415	0	FALSE	FALSE
Early	NS8	NS8_F6C	F	6	C	10	0.96835	0.9918	-2	-0.00990099	-44.0309	-0.3	0.00990099	44.0309	0.3				21	0	FALSE	FALSE
Early	NS8	NS8_F6R	F	6	R	1	0.042	0.042	-3	0.99999	9.0119	-7.3	0.99999	9.0119	7.3				0	0	FALSE	FALSE
Early	NS8	NS8_G66C	G	66	C	1	0.0431	0.0431	-3	-0.00990099	46.0916	2.9	0.00990099	46.0916	2.9				1350	3	FALSE	FALSE
Early	NS8	NS8_G77A	G	77	A	1	0.2439	0.2439	0	0.035773	14.0266	2.2	0.035773	14.0266	2.2				12	0	FALSE	FALSE
Early	NS8	NS8_G77C	G	77	C	2	0.041	0.0504	-3	-0.00990099	46.0916	2.9	0.00990099	46.0916	2.9				1255	3	FALSE	FALSE
Early	NS8	NS8_G77R	G	77	R	1	0.0931	0.0931	-2	0.99999	99.1344	-4.1	0.99999	99.1344	4.1				29	0	FALSE	FALSE
Early	NS8	NS8_G96C	G	96	C	1	0.1704	0.1704	-3	-0.00990099	46.0916	2.9	0.00990099	46.0916	2.9				439	0	FALSE	FALSE
Early	NS8	NS8_G96S	G	96	S	1	0.032	0.032	0	-0.299955	30.026	-0.4	0.299955	30.026	0.4				193	7	FALSE	FALSE
Early	NS8	NS8_H112Q	H	112	Q	1	0.0311	0.0311	0	-0.0871742	-9.0101	-0.3	0.0871742	9.0101	0.3				15	4	FALSE	FALSE
Early	NS8	NS8_H17Y	H	17	Y	1	0.0545	0.0545	2	-0.0881732	26.0339	1.9	0.0881732	26.0339	1.9				18332	7	FALSE	FALSE
Early	NS8	NS8_H28D	H	28	D	1	0.0317	0.0317	-1	-1.08287	-22.0519	-0.3	1.08287	22.0519	0.3				66	0	FALSE	FALSE
Early	NS8	NS8_H28L	H	28	L	1	0.0865	0.0865	-3	-0.0871742	-23.9817	7	0.0871742	23.9817	7				180	1	FALSE	FALSE
Early	NS8	NS8_I10N	I	10	N	1	0.0466	0.0466	-3	0	0.945	-8	0	0.945	8				159	0	FALSE	FALSE
Early	NS8	NS8_I47N	I	47	N	1	0.0312	0.0312	-3	0	0.945	-8	0	0.945	8				69	0	FALSE	FALSE
Early	NS8	NS8_I71V	I	71	V	1	0.04	0.04	3	-0.0261132	-14.0266	-0.3	0.0261132	14.0266	0.3				1990	0	FALSE	FALSE
Early	NS8	NS8_K2E	K	2	E	1	0.0921	0.0921	1	-1.91704	0.9417	0.4	1.91704	0.9417	0.4				213	2	FALSE	FALSE
Early	NS8	NS8_K2V	K	2	V	1	0.0544	0.0544	-2	-1.02511	-29.0413	8.1	1.02511	29.0413	8.1				1	0	FALSE	FALSE
Early	NS8	NS8_K53N	K	53	N	1	0.2918	0.2918	0	-0.999001	-14.0697	0.4	0.999001	14.0697	0.4				165	0	FALSE	FALSE
Early	NS8	NS8_K94E	K	94	E	5	0.0335	0.0444	1	-1.91704	0.9417	0.4	1.91704	0.9417	0.4				80	1	FALSE	FALSE
Early	NS8	NS8_L118V	L	118	V	60	0.0773	0.165	1	-0.0261132	-14.0266	0.4	0.0261132	14.0266	0.4				14630	0	FALSE	FALSE
Early	NS8	NS8_L22S	L	22	S	1	0.0892	0.0892	-2	-0.299955	-26.0803	-4.6	0.299955	26.0803	4.6				172	0	FALSE	FALSE
Early	NS8	NS8_L4H	L	4	H	1	0.0649	0.0649	-3	0.0871742	23.9817	-7	0.0871742	23.9817	7				2	0	FALSE	FALSE
Early	NS8	NS8_L57I	L	57	I	12	0.04835	0.0919	2	0	0	0.7	0	0	0.7				201	0	FALSE	FALSE
Early	NS8	NS8_L60S	L	60	S	1	0.0568	0.0568	-2	-0.299955	-26.0803	-4.6	0.299955	26.0803	4.6				106	0	FALSE	FALSE
Early	NS8	NS8_L84P	L	84	P	1	0.0484	0.0484	-3	0.198427	-16.0424	-5.4	0.198427	16.0424	5.4				1	0	FALSE	FALSE
Early	NS8	NS8_L95G	L	95	G	1	0.0383	0.0383	-4	0	-56.1063	-4.2	0	56.1063	4.2				0	0	FALSE	FALSE
Early	NS8	NS8_L98I	L	98	I	1	0.0558	0.0558	2	0	0	0.7	0	0	0.7				120	0	FALSE	FALSE
Early	NS8	NS8_L98T	L	98	T	1	0.0315	0.0315	-1	-0.361905	-12.0537	-4.5	0.361905	12.0537	4.5				19	0	FALSE	FALSE
Early	NS8	NS8_M1I	M	1	I	5	0.0464	0.0948	1	0.259747	-18.0384	2.6	0.259747	18.0384	2.6				372	3	FALSE	FALSE
Early	NS8	NS8_M1K	M	1	K	2	0.0474	0.0592	-1	1.25875	-3.0237	-5.8	1.25875	3.0237	5.8				0	0	FALSE	FALSE
Early	NS8	NS8_N89K	N	89	K	1	0.0382	0.0382	0	0.999001	14.0697	-0.4	0.999001	14.0697	0.4				301	0	FALSE	FALSE
Early	NS8	NS8_P36L	P	36	L	1	0.0468	0.0468	-3	-0.198427	16.0424	5.4	0.198427	16.0424	5.4				4933	12	FALSE	FALSE
Early	NS8	NS8_P36S	P	36	S	1	0.0404	0.0404	-1	-0.498382	-10.0379	0.8	0.498382	10.0379	0.8				12710	19	FALSE	FALSE
Early	NS8	NS8_P38S	P	38	S	1	0.0605	0.0605	-1	-0.498382	-10.0379	0.8	0.498382	10.0379	0.8				11498	10	FALSE	FALSE
Early	NS8	NS8_P56L	P	56	L	1	0.051	0.051	-3	-0.198427	16.0424	5.4	0.198427	16.0424	5.4				428	2	FALSE	FALSE
Early	NS8	NS8_P70T	P	70	T	1	0.0323	0.0323	-1	-0.560332	3.9887	0.9	0.560332	3.9887	0.9				481	0	FALSE	FALSE
Early	NS8	NS8_P85S	P	85	S	1	0.0435	0.0435	-1	-0.498382	-10.0379	0.8	0.498382	10.0379	0.8				3573	2	FALSE	FALSE
Early	NS8	NS8_P93S	P	93	S	1	0.032	0.032	-1	-0.498382	-10.0379	0.8	0.498382	10.0379	0.8				16304	0	FALSE	FALSE
Early	NS8	NS8_Q18H	Q	18	H	1	0.3517	0.3517	0	0.0871742	9.0101	0.3	0.0871742	9.0101	0.3				562	1	FALSE	FALSE
Early	NS8	NS8_Q18K	Q	18	K	1	0.0593	0.0593	1	0.999001	0.0431	-0.4	0.999001	0.0431	0.4				408	0	FALSE	FALSE
Early	NS8	NS8_Q27E	Q	27	E	1	0.0431	0.0431	2	-0.918037	0.9848	0	0.918037	0.9848	0				38	0	FALSE	FALSE
Early	NS8	NS8_Q27K	Q	27	K	11	0.1501	0.2535	1	0.999001	0.0431	-0.4	0.999001	0.0431	0.4				1746	3	FALSE	FALSE
Early	NS8	NS8_Q72H	Q	72	H	1	0.0329	0.0329	0	0.0871742	9.0101	0.3	0.0871742	9.0101	0.3				8805	22	FALSE	FALSE
Early	NS8	NS8_Q72K	Q	72	K	1	0.0322	0.0322	1	0.999001	0.0431	-0.4	0.999001	0.0431	0.4				68	0	FALSE	FALSE
Early	NS8	NS8_R101C	R	101	C	1	0.0748	0.0748	-3	-1.00989	-53.0428	7	1.00989	53.0428	7				709	0	FALSE	FALSE
Early	NS8	NS8_R52I	R	52	I	1	0.051	0.051	-3	-0.99999	-43.0281	9	0.99999	43.0281	9				641669	10	TRUE	FALSE
Early	NS8	NS8_R52K	R	52	K	1	0.0336	0.0336	2	-0.000989001	-28.0134	0.6	0.000989001	28.0134	0.6				2154	0	FALSE	FALSE
Early	NS8	NS8_S43P	S	43	P	1	0.0654	0.0654	-1	0.498382	10.0379	-0.8	0.498382	10.0379	0.8				143	0	FALSE	FALSE
Early	NS8	NS8_S54L	S	54	L	1	0.0301	0.0301	-2	0.299955	26.0803	4.6	0.299955	26.0803	4.6				7734	9	FALSE	FALSE
Early	NS8	NS8_S54P	S	54	P	1	0.0313	0.0313	-1	0.498382	10.0379	-0.8	0.498382	10.0379	0.8				2232	1	FALSE	FALSE
Early	NS8	NS8_S67F	S	67	F	2	0.51155	0.9928	-2	0.299955	60.0965	3.6	0.299955	60.0965	3.6				35797	30	FALSE	FALSE
Early	NS8	NS8_S67Y	S	67	Y	1	0.0326	0.0326	-2	0.298956	76.0959	-0.5	0.298956	76.0959	0.5				586	0	FALSE	FALSE
Early	NS8	NS8_S69T	S	69	T	1	0.0324	0.0324	1	-0.0619499	14.0266	0.1	0.0619499	14.0266	0.1				163	0	FALSE	FALSE
Early	NS8	NS8_S82A	S	82	A	1	0.0432	0.0432	1	0.335728	-15.9994	2.6	0.335728	15.9994	2.6				51	0	FALSE	FALSE
Early	NS8	NS8_S97N	S	97	N	1	0.992	0.992	1	0.299955	27.0253	-2.7	0.299955	27.0253	2.7				206	1	FALSE	FALSE
Early	NS8	NS8_T11I	T	11	I	1	0.0326	0.0326	-1	0.361905	12.0537	5.2	0.361905	12.0537	5.2				32106	10	FALSE	FALSE
Early	NS8	NS8_T11K	T	11	K	2	0.04485	0.0538	-1	1.36091	27.0684	-3.2	1.36091	27.0684	3.2				8149	1	FALSE	FALSE
Early	NS8	NS8_T11R	T	11	R	1	0.0335	0.0335	-1	1.3619	55.0818	-3.8	1.3619	55.0818	3.8				5	0	FALSE	FALSE
Early	NS8	NS8_T87I	T	87	I	1	0.0592	0.0592	-1	0.361905	12.0537	5.2	0.361905	12.0537	5.2				8813	13	FALSE	FALSE
Early	NS8	NS8_V100M	V	100	M	1	0.0374	0.0374	1	-0.233634	32.065	-2.3	0.233634	32.065	2.3				80	0	FALSE	FALSE
Early	NS8	NS8_V114F	V	114	F	46	0.0768	0.1667	-1	0.0261132	48.0428	-1.4	0.0261132	48.0428	1.4				1101	4	FALSE	FALSE
Early	NS8	NS8_V114I	V	114	I	2	0.98895	0.9933	3	0.0261132	14.0266	0.3	0.0261132	14.0266	0.3				780	4	FALSE	FALSE
Early	NS8	NS8_V116S	V	116	S	47	0.0769	0.165	-2	-0.273842	-12.0537	-5	0.273842	12.0537	5				71	0	FALSE	FALSE
Early	NS8	NS8_V117L	V	117	L	56	0.07525	0.165	1	0.0261132	14.0266	-0.4	0.0261132	14.0266	0.4				678	0	FALSE	FALSE
Early	NS8	NS8_V33G	V	33	G	1	0.0314	0.0314	-3	0.0261132	-42.0797	-4.6	0.0261132	42.0797	4.6				384	0	FALSE	FALSE
Early	NS8	NS8_V49A	V	49	A	1	0.0909	0.0909	0	0.0618862	-28.0531	-2.4	0.0618862	28.0531	2.4				192	0	FALSE	FALSE
Early	NS8	NS8_V49L	V	49	L	1	0.0503	0.0503	1	0.0261132	14.0266	-0.4	0.0261132	14.0266	0.4				321	2	FALSE	FALSE
Early	NS8	NS8_V5E	V	5	E	1	0.0336	0.0336	-2	-0.891923	29.983	-7.7	0.891923	29.983	7.7				1	0	FALSE	FALSE
Early	NS8	NS8_V62G	V	62	G	1	0.0743	0.0743	-3	0.0261132	-42.0797	-4.6	0.0261132	42.0797	4.6				20	0	FALSE	FALSE
Early	NS8	NS8_V62L	V	62	L	10	0.97065	0.997	1	0.0261132	14.0266	-0.4	0.0261132	14.0266	0.4				22744	1012	FALSE	FALSE
Early	NS8	NS8_V81A	V	81	A	1	0.0416	0.0416	0	0.0618862	-28.0531	-2.4	0.0618862	28.0531	2.4				503	3	FALSE	FALSE
Early	NS8	NS8_Y111C	Y	111	C	1	0.0426	0.0426	-2	-0.00890199	-60.0303	3.8	0.00890199	60.0303	3.8				803	1	FALSE	FALSE
Early	NS8	NS8_Y111H	Y	111	H	2	0.08785	0.1372	2	0.0881732	-26.0339	-1.9	0.0881732	26.0339	1.9				279	0	FALSE	FALSE
Early	NS8	NS8_Y111N	Y	111	N	2	0.0896	0.1173	-2	0.000999001	-49.0706	-2.2	0.000999001	49.0706	2.2				12	0	FALSE	FALSE
Early	NS8	NS8_Y46N	Y	46	N	1	0.0312	0.0312	-2	0.000999001	-49.0706	-2.2	0.000999001	49.0706	2.2				177	0	FALSE	FALSE
Early	NS8	NS8_Y73G	Y	73	G	1	0.0339	0.0339	-3	0.000999001	-106.122	0.9	0.000999001	106.122	0.9				3	0	FALSE	FALSE
Early	NS8	NS8_Y73N	Y	73	N	1	0.0327	0.0327	-2	0.000999001	-49.0706	-2.2	0.000999001	49.0706	2.2				8	0	FALSE	FALSE
Early	NSP1	NSP1_A117T	A	117	T	2	0.99885	0.999	0	-0.397678	30.026	-2.5	0.397678	30.026	2.5				1156	3	FALSE	FALSE
Early	NSP1	NSP1_A131V	A	131	V	10	0.22355	0.2773	0	-0.0618862	28.0531	2.4	0.0618862	28.0531	2.4				4211	2	FALSE	FALSE
Early	NSP1	NSP1_A138S	A	138	S	1	0.0699	0.0699	1	-0.335728	15.9994	-2.6	0.335728	15.9994	2.6				190	1	FALSE	FALSE
Early	NSP1	NSP1_A138T	A	138	T	2	0.0623	0.0897	0	-0.397678	30.026	-2.5	0.397678	30.026	2.5				3002	7	FALSE	FALSE
Early	NSP1	NSP1_A76D	A	76	D	1	0.1266	0.1266	-2	-1.03147	44.0095	-5.3	1.03147	44.0095	5.3				80	0	FALSE	FALSE
Early	NSP1	NSP1_A79Q	A	79	Q	1	0.0344	0.0344	-1	-0.035773	57.0513	-5.3	0.035773	57.0513	5.3				0	0	FALSE	FALSE
Early	NSP1	NSP1_A79V	A	79	V	1	0.0407	0.0407	0	-0.0618862	28.0531	2.4	0.0618862	28.0531	2.4				543	0	FALSE	FALSE
Early	NSP1	NSP1_A90P	A	90	P	1	0.2239	0.2239	-1	0.162654	26.0373	-3.4	0.162654	26.0373	3.4				85	0	FALSE	FALSE
Early	NSP1	NSP1_A90T	A	90	T	3	0.0616	0.0663	0	-0.397678	30.026	-2.5	0.397678	30.026	2.5				318	1	FALSE	FALSE
Early	NSP1	NSP1_A90V	A	90	V	1	0.1148	0.1148	0	-0.0618862	28.0531	2.4	0.0618862	28.0531	2.4				1342	1	FALSE	FALSE
Early	NSP1	NSP1_D144N	D	144	N	1	0.0316	0.0316	1	0.995698	-0.9848	0	0.995698	0.9848	0				399	0	FALSE	FALSE
Early	NSP1	NSP1_D156E	D	156	E	1	0.0529	0.0529	2	0.0776616	14.0266	0	0.0776616	14.0266	0				74	0	FALSE	FALSE
Early	NSP1	NSP1_D156Y	D	156	Y	1	0.0684	0.0684	-3	0.994699	48.0858	2.2	0.994699	48.0858	2.2				181	0	FALSE	FALSE
Early	NSP1	NSP1_D75E	D	75	E	1	0.9953	0.9953	2	0.0776616	14.0266	0	0.0776616	14.0266	0				714	842	FALSE	FALSE
Early	NSP1	NSP1_E155K	E	155	K	1	0.0606	0.0606	1	1.91704	-0.9417	-0.4	1.91704	0.9417	0.4				85	0	FALSE	FALSE
Early	NSP1	NSP1_E159K	E	159	K	1	0.0859	0.0859	1	1.91704	-0.9417	-0.4	1.91704	0.9417	0.4				264	0	FALSE	FALSE
Early	NSP1	NSP1_E172K	E	172	K	1	0.069	0.069	1	1.91704	-0.9417	-0.4	1.91704	0.9417	0.4				190	1	FALSE	FALSE
Early	NSP1	NSP1_E37D	E	37	D	1	0.6288	0.6288	2	-0.0776616	-14.0266	0	0.0776616	14.0266	0				5476	13	FALSE	FALSE
Early	NSP1	NSP1_E55V	E	55	V	1	0.0342	0.0342	-2	0.891923	-29.983	7.7	0.891923	29.983	7.7				64	0	FALSE	FALSE
Early	NSP1	NSP1_E57K	E	57	K	1	0.0494	0.0494	1	1.91704	-0.9417	-0.4	1.91704	0.9417	0.4				1172	0	FALSE	FALSE
Early	NSP1	NSP1_E65L	E	65	L	1	0.0542	0.0542	-3	0.918037	-15.9564	7.3	0.918037	15.9564	7.3				0	1	FALSE	FALSE
Early	NSP1	NSP1_E87D	E	87	D	2	0.1047	0.1378	2	-0.0776616	-14.0266	0	0.0776616	14.0266	0				26398	11	FALSE	FALSE
Early	NSP1	NSP1_E87K	E	87	K	1	0.0369	0.0369	1	1.91704	-0.9417	-0.4	1.91704	0.9417	0.4				6438	5	FALSE	FALSE
Early	NSP1	NSP1_E91D	E	91	D	2	0.06495	0.069	2	-0.0776616	-14.0266	0	0.0776616	14.0266	0				18	2	FALSE	FALSE
Early	NSP1	NSP1_F143L	F	143	L	1	0.0318	0.0318	0	0	-34.0162	1	0	34.0162	1				2262	1	FALSE	FALSE
Early	NSP1	NSP1_F143S	F	143	S	6	0.04805	0.1875	-2	-0.299955	-60.0965	-3.6	0.299955	60.0965	3.6				105	2	FALSE	FALSE
Early	NSP1	NSP1_F143Y	F	143	Y	1	0.0766	0.0766	3	-0.000999001	15.9994	-4.1	0.000999001	15.9994	4.1				133	0	FALSE	FALSE
Early	NSP1	NSP1_F157S	F	157	S	1	0.0407	0.0407	-2	-0.299955	-60.0965	-3.6	0.299955	60.0965	3.6				51	0	FALSE	FALSE
Early	NSP1	NSP1_G101D	G	101	D	1	0.0333	0.0333	-1	-0.995698	58.0361	-3.1	0.995698	58.0361	3.1				487	0	FALSE	FALSE
Early	NSP1	NSP1_G105A	G	105	A	1	0.0524	0.0524	0	0.035773	14.0266	2.2	0.035773	14.0266	2.2				0	0	FALSE	FALSE
Early	NSP1	NSP1_G105D	G	105	D	1	0.035	0.035	-1	-0.995698	58.0361	-3.1	0.995698	58.0361	3.1				392	0	FALSE	FALSE
Early	NSP1	NSP1_G105R	G	105	R	1	0.0804	0.0804	-2	0.99999	99.1344	-4.1	0.99999	99.1344	4.1				8	0	FALSE	FALSE
Early	NSP1	NSP1_G105S	G	105	S	1	0.049	0.049	0	-0.299955	30.026	-0.4	0.299955	30.026	0.4				333	18	FALSE	FALSE
Early	NSP1	NSP1_G112Y	G	112	Y	2	0.0616	0.0616	-3	-0.000999001	106.122	-0.9	0.000999001	106.122	0.9				0	0	FALSE	FALSE
Early	NSP1	NSP1_G127S	G	127	S	1	0.0366	0.0366	0	-0.299955	30.026	-0.4	0.299955	30.026	0.4				364	1	FALSE	FALSE
Early	NSP1	NSP1_G133A	G	133	A	1	0.1996	0.1996	0	0.035773	14.0266	2.2	0.035773	14.0266	2.2				10	0	FALSE	FALSE
Early	NSP1	NSP1_G137V	G	137	V	1	0.0798	0.0798	-3	-0.0261132	42.0797	4.6	0.0261132	42.0797	4.6				941	2	FALSE	FALSE
Early	NSP1	NSP1_G146S	G	146	S	1	0.0702	0.0702	0	-0.299955	30.026	-0.4	0.299955	30.026	0.4				1026	0	FALSE	FALSE
Early	NSP1	NSP1_G146V	G	146	V	1	0.068	0.068	-3	-0.0261132	42.0797	4.6	0.0261132	42.0797	4.6				67	0	FALSE	FALSE
Early	NSP1	NSP1_G49V	G	49	V	1	0.0691	0.0691	-3	-0.0261132	42.0797	4.6	0.0261132	42.0797	4.6				45	0	FALSE	FALSE
Early	NSP1	NSP1_G94C	G	94	C	2	0.0452	0.0464	-3	-0.00990099	46.0916	2.9	0.00990099	46.0916	2.9				1974	3	FALSE	FALSE
Early	NSP1	NSP1_G98C	G	98	C	1	0.0355	0.0355	-3	-0.00990099	46.0916	2.9	0.00990099	46.0916	2.9				344	1	FALSE	FALSE
Early	NSP1	NSP1_G98R	G	98	R	1	0.1229	0.1229	-2	0.99999	99.1344	-4.1	0.99999	99.1344	4.1				16	0	FALSE	FALSE
Early	NSP1	NSP1_G98V	G	98	V	2	0.067	0.0719	-3	-0.0261132	42.0797	4.6	0.0261132	42.0797	4.6				206	3	FALSE	FALSE
Early	NSP1	NSP1_H110Q	H	110	Q	1	0.298	0.298	0	-0.0871742	-9.0101	-0.3	0.0871742	9.0101	0.3				171	2	FALSE	FALSE
Early	NSP1	NSP1_H110Y	H	110	Y	1	0.0734	0.0734	2	-0.0881732	26.0339	1.9	0.0881732	26.0339	1.9				34057	22	FALSE	FALSE
Early	NSP1	NSP1_H81P	H	81	P	1	0.0377	0.0377	-2	0.111253	-40.0241	1.6	0.111253	40.0241	1.6				33	0	FALSE	FALSE
Early	NSP1	NSP1_H81Q	H	81	Q	1	0.0325	0.0325	0	-0.0871742	-9.0101	-0.3	0.0871742	9.0101	0.3				439	1	FALSE	FALSE
Early	NSP1	NSP1_H81Y	H	81	Y	2	0.52745	0.9724	2	-0.0881732	26.0339	1.9	0.0881732	26.0339	1.9				3407	4	FALSE	FALSE
Early	NSP1	NSP1_I114M	I	114	M	1	0.0654	0.0654	1	-0.259747	18.0384	-2.6	0.259747	18.0384	2.6				305	1	FALSE	FALSE
Early	NSP1	NSP1_I114T	I	114	T	1	0.0397	0.0397	-1	-0.361905	-12.0537	-5.2	0.361905	12.0537	5.2				5240	3	FALSE	FALSE
Early	NSP1	NSP1_K120N	K	120	N	1	0.0356	0.0356	0	-0.999001	-14.0697	0.4	0.999001	14.0697	0.4				19512	3	FALSE	FALSE
Early	NSP1	NSP1_K125Q	K	125	Q	1	0.036	0.036	1	-0.999001	-0.0431	0.4	0.999001	0.0431	0.4				12	0	FALSE	FALSE
Early	NSP1	NSP1_K129N	K	129	N	1	0.0485	0.0485	0	-0.999001	-14.0697	0.4	0.999001	14.0697	0.4				65	4	FALSE	FALSE
Early	NSP1	NSP1_K129T	K	129	T	2	0.0396	0.0422	-1	-1.36091	-27.0684	3.2	1.36091	27.0684	3.2				10	0	FALSE	FALSE
Early	NSP1	NSP1_K141D	K	141	D	3	0.0328	0.131	-1	-1.9947	-13.0849	0.4	1.9947	13.0849	0.4				48	0	FALSE	FALSE
Early	NSP1	NSP1_K164I	K	164	I	5	0.0415	0.0608	-3	-0.999001	-15.0147	8.4	0.999001	15.0147	8.4				1	0	FALSE	FALSE
Early	NSP1	NSP1_K164Y	K	164	Y	1	0.0309	0.0309	-2	-1	35.0009	2.6	1	35.0009	2.6				1	0	FALSE	FALSE
Early	NSP1	NSP1_K47T	K	47	T	1	0.0497	0.0497	-1	-1.36091	-27.0684	3.2	1.36091	27.0684	3.2				6	0	FALSE	FALSE
Early	NSP1	NSP1_K58N	K	58	N	1	0.063	0.063	0	-0.999001	-14.0697	0.4	0.999001	14.0697	0.4				66	0	FALSE	FALSE
Early	NSP1	NSP1_L104H	L	104	H	1	0.0442	0.0442	-3	0.0871742	23.9817	-7	0.0871742	23.9817	7				51	0	FALSE	FALSE
Early	NSP1	NSP1_L104P	L	104	P	1	0.1114	0.1114	-3	0.198427	-16.0424	-5.4	0.198427	16.0424	5.4				90	0	FALSE	FALSE
Early	NSP1	NSP1_L104R	L	104	R	1	0.076	0.076	-2	0.99999	43.0281	-8.3	0.99999	43.0281	8.3				37	0	FALSE	FALSE
Early	NSP1	NSP1_L104S	L	104	S	1	0.0434	0.0434	-2	-0.299955	-26.0803	-4.6	0.299955	26.0803	4.6				0	0	FALSE	FALSE
Early	NSP1	NSP1_L107F	L	107	F	1	0.0479	0.0479	0	0	34.0162	-1	0	34.0162	1				1900	4	FALSE	FALSE
Early	NSP1	NSP1_L122F	L	122	F	1	0.0598	0.0598	0	0	34.0162	-1	0	34.0162	1				2408	3	FALSE	FALSE
Early	NSP1	NSP1_L122P	L	122	P	1	0.0359	0.0359	-3	0.198427	-16.0424	-5.4	0.198427	16.0424	5.4				61	0	FALSE	FALSE
Early	NSP1	NSP1_L140I	L	140	I	2	0.1302	0.2231	2	0	0	0.7	0	0	0.7				191	0	FALSE	FALSE
Early	NSP1	NSP1_L16H	L	16	H	4	0.10275	0.129	-3	0.0871742	23.9817	-7	0.0871742	23.9817	7				52	0	FALSE	FALSE
Early	NSP1	NSP1_L16I	L	16	I	1	0.0385	0.0385	2	0	0	0.7	0	0	0.7				193	0	FALSE	FALSE
Early	NSP1	NSP1_L177D	L	177	D	2	0.0761	0.0761	-4	-0.995698	1.9298	-7.3	0.995698	1.9298	7.3				0	0	FALSE	FALSE
Early	NSP1	NSP1_L18S	L	18	S	5	0.0737	0.0804	-2	-0.299955	-26.0803	-4.6	0.299955	26.0803	4.6				51	1	FALSE	FALSE
Early	NSP1	NSP1_L21K	L	21	K	8	0.07635	0.2456	-2	0.999001	15.0147	-7.7	0.999001	15.0147	7.7				61	0	FALSE	FALSE
Early	NSP1	NSP1_L21V	L	21	V	1	0.0571	0.0571	1	-0.0261132	-14.0266	0.4	0.0261132	14.0266	0.4				36	0	FALSE	FALSE
Early	NSP1	NSP1_L4F	L	4	F	1	0.4151	0.4151	0	0	34.0162	-1	0	34.0162	1				2504	1	FALSE	FALSE
Early	NSP1	NSP1_L4I	L	4	I	1	0.055	0.055	2	0	0	0.7	0	0	0.7				67	4	FALSE	FALSE
Early	NSP1	NSP1_L4P	L	4	P	1	0.0473	0.0473	-3	0.198427	-16.0424	-5.4	0.198427	16.0424	5.4				107	0	FALSE	FALSE
Early	NSP1	NSP1_L64F	L	64	F	1	0.0874	0.0874	0	0	34.0162	-1	0	34.0162	1				404	0	FALSE	FALSE
Early	NSP1	NSP1_L92F	L	92	F	1	0.0383	0.0383	0	0	34.0162	-1	0	34.0162	1				4962	5	FALSE	FALSE
Early	NSP1	NSP1_L92P	L	92	P	1	0.0473	0.0473	-3	0.198427	-16.0424	-5.4	0.198427	16.0424	5.4				233	1	FALSE	FALSE
Early	NSP1	NSP1_M174L	M	174	L	2	0.0331	0.0331	2	0.259747	-18.0384	1.9	0.259747	18.0384	1.9				63	0	FALSE	FALSE
Early	NSP1	NSP1_M85Q	M	85	Q	2	0.0323	0.0332	0	0.259747	-3.0668	-5.4	0.259747	3.0668	5.4				6	0	FALSE	FALSE
Early	NSP1	NSP1_M85R	M	85	R	1	0.0342	0.0342	-1	1.25974	24.9897	-6.4	1.25974	24.9897	6.4				37	0	FALSE	FALSE
Early	NSP1	NSP1_M85T	M	85	T	1	0.039	0.039	-1	-0.102158	-30.0921	-2.6	0.102158	30.0921	2.6				170	0	FALSE	FALSE
Early	NSP1	NSP1_M85V	M	85	V	1	0.0444	0.0444	1	0.233634	-32.065	2.3	0.233634	32.065	2.3				38485	27	FALSE	FALSE
Early	NSP1	NSP1_N126H	N	126	H	1	0.0418	0.0418	1	0.0871742	23.0367	0.3	0.0871742	23.0367	0.3				47	0	FALSE	FALSE
Early	NSP1	NSP1_N126T	N	126	T	1	0.0333	0.0333	0	-0.361905	-12.9987	2.8	0.361905	12.9987	2.8				32	0	FALSE	FALSE
Early	NSP1	NSP1_N128I	N	128	I	3	0.0414	0.059	-3	0	-0.945	8	0	0.945	8				78	0	FALSE	FALSE
Early	NSP1	NSP1_N162P	N	162	P	1	0.0304	0.0304	-2	0.198427	-16.9874	1.9	0.198427	16.9874	1.9				0	0	FALSE	FALSE
Early	NSP1	NSP1_P19D	P	19	D	1	0.0693	0.0693	-1	-1.19413	17.9722	-1.9	1.19413	17.9722	1.9				0	0	FALSE	FALSE
Early	NSP1	NSP1_P19T	P	19	T	2	0.0439	0.0482	-1	-0.560332	3.9887	0.9	0.560332	3.9887	0.9				16	0	FALSE	FALSE
Early	NSP1	NSP1_Q15K	Q	15	K	5	0.1327	0.2105	1	0.999001	0.0431	-0.4	0.999001	0.0431	0.4				226	0	FALSE	FALSE
Early	NSP1	NSP1_Q66L	Q	66	L	9	0.0667	0.1053	-2	0	-14.9716	7.3	0	14.9716	7.3				21	0	FALSE	FALSE
Early	NSP1	NSP1_Q96H	Q	96	H	1	0.0654	0.0654	0	0.0871742	9.0101	0.3	0.0871742	9.0101	0.3				270	1	FALSE	FALSE
Early	NSP1	NSP1_R124C	R	124	C	15	0.1165	0.6307	-3	-1.00989	-53.0428	7	1.00989	53.0428	7				10044	23	FALSE	FALSE
Early	NSP1	NSP1_R175H	R	175	H	1	0.0995	0.0995	0	-0.912816	-19.0464	1.3	0.912816	19.0464	1.3				366	0	FALSE	FALSE
Early	NSP1	NSP1_R175L	R	175	L	1	0.0604	0.0604	-2	-0.99999	-43.0281	8.3	0.99999	43.0281	8.3				168	1	FALSE	FALSE
Early	NSP1	NSP1_R77Q	R	77	Q	4	0.05435	0.1075	1	-0.99999	-28.0565	1	0.99999	28.0565	1				792	0	FALSE	FALSE
Early	NSP1	NSP1_S135I	S	135	I	1	0.0596	0.0596	-2	0.299955	26.0803	5.3	0.299955	26.0803	5.3				52	5	FALSE	FALSE
Early	NSP1	NSP1_S142T	S	142	T	1	0.0756	0.0756	1	-0.0619499	14.0266	0.1	0.0619499	14.0266	0.1				110	0	FALSE	FALSE
Early	NSP1	NSP1_S17K	S	17	K	2	0.06145	0.0846	0	1.29896	41.095	-3.1	1.29896	41.095	3.1				0	0	FALSE	FALSE
Early	NSP1	NSP1_S17T	S	17	T	1	0.038	0.038	1	-0.0619499	14.0266	0.1	0.0619499	14.0266	0.1				9	0	FALSE	FALSE
Early	NSP1	NSP1_S40L	S	40	L	1	0.1135	0.1135	-2	0.299955	26.0803	4.6	0.299955	26.0803	4.6				2440	1	FALSE	FALSE
Early	NSP1	NSP1_T12A	T	12	A	1	0.0305	0.0305	0	0.397678	-30.026	2.5	0.397678	30.026	2.5				268	0	FALSE	FALSE
Early	NSP1	NSP1_T12I	T	12	I	1	0.0418	0.0418	-1	0.361905	12.0537	5.2	0.361905	12.0537	5.2				2400	7	FALSE	FALSE
Early	NSP1	NSP1_T12K	T	12	K	1	0.0305	0.0305	-1	1.36091	27.0684	-3.2	1.36091	27.0684	3.2				25	0	FALSE	FALSE
Early	NSP1	NSP1_T170P	T	170	P	1	0.0376	0.0376	-1	0.560332	-3.9887	-0.9	0.560332	3.9887	0.9				4	0	FALSE	FALSE
Early	NSP1	NSP1_V111G	V	111	G	2	0.0469	0.0469	-3	0.0261132	-42.0797	-4.6	0.0261132	42.0797	4.6				24	0	FALSE	FALSE
Early	NSP1	NSP1_V111L	V	111	L	2	0.1007	0.1291	1	0.0261132	14.0266	-0.4	0.0261132	14.0266	0.4				874	4	FALSE	FALSE
Early	NSP1	NSP1_V14A	V	14	A	4	0.04515	0.0494	0	0.0618862	-28.0531	-2.4	0.0618862	28.0531	2.4				191	0	FALSE	FALSE
Early	NSP1	NSP1_V14I	V	14	I	1	0.0322	0.0322	3	0.0261132	14.0266	0.3	0.0261132	14.0266	0.3				291	1	FALSE	FALSE
Early	NSP1	NSP1_V23G	V	23	G	1	0.055	0.055	-3	0.0261132	-42.0797	-4.6	0.0261132	42.0797	4.6				4	0	FALSE	FALSE
Early	NSP1	NSP1_V28L	V	28	L	1	0.0473	0.0473	1	0.0261132	14.0266	-0.4	0.0261132	14.0266	0.4				334	2	FALSE	FALSE
Early	NSP1	NSP1_V5A	V	5	A	1	0.3865	0.3865	0	0.0618862	-28.0531	-2.4	0.0618862	28.0531	2.4				317	1	FALSE	FALSE
Early	NSP1	NSP1_V69L	V	69	L	1	0.0358	0.0358	1	0.0261132	14.0266	-0.4	0.0261132	14.0266	0.4				40	0	FALSE	FALSE
Early	NSP1	NSP1_V86D	V	86	D	3	0.0517	0.0612	-3	-0.969585	15.9564	-7.7	0.969585	15.9564	7.7				148	0	FALSE	FALSE
Early	NSP1	NSP1_V86F	V	86	F	3	0.0359	0.0584	-1	0.0261132	48.0428	-1.4	0.0261132	48.0428	1.4				1852	3	FALSE	FALSE
Early	NSP1	NSP1_V89G	V	89	G	3	0.0632	0.0676	-3	0.0261132	-42.0797	-4.6	0.0261132	42.0797	4.6				2	0	FALSE	FALSE
Early	NSP1	NSP1_W161R	W	161	R	1	0.0647	0.0647	-3	0.99999	-30.0242	-3.6	0.99999	30.0242	3.6				208	0	FALSE	FALSE
Early	NSP1	NSP1_W161S	W	161	S	2	0.04405	0.0574	-3	-0.299955	-99.1326	0.1	0.299955	99.1326	0.1				4	0	FALSE	FALSE
Early	NSP10	NSP10_A18S	A	18	S	1	0.0552	0.0552	1	-0.335728	15.9994	-2.6	0.335728	15.9994	2.6				74	1	FALSE	FALSE
Early	NSP10	NSP10_A1D	A	1	D	1	0.0366	0.0366	-2	-1.03147	44.0095	-5.3	1.03147	44.0095	5.3				0	0	FALSE	FALSE
Early	NSP10	NSP10_A1E	A	1	E	1	0.0351	0.0351	-1	-0.95381	58.0361	-5.3	0.95381	58.0361	5.3				0	0	FALSE	FALSE
Early	NSP10	NSP10_A1G	A	1	G	1	0.0319	0.0319	0	-0.035773	-14.0266	-2.2	0.035773	14.0266	2.2				0	0	FALSE	FALSE
Early	NSP10	NSP10_A1N	A	1	N	1	0.0303	0.0303	-2	-0.035773	43.0247	-5.3	0.035773	43.0247	5.3				0	0	FALSE	FALSE
Early	NSP10	NSP10_A1P	A	1	P	3	0.0546	0.0667	-1	0.162654	26.0373	-3.4	0.162654	26.0373	3.4				0	0	FALSE	FALSE
Early	NSP10	NSP10_A1S	A	1	S	2	0.07135	0.0732	1	-0.335728	15.9994	-2.6	0.335728	15.9994	2.6				68	0	FALSE	FALSE
Early	NSP10	NSP10_A1T	A	1	T	1	0.0621	0.0621	0	-0.397678	30.026	-2.5	0.397678	30.026	2.5				0	0	FALSE	FALSE
Early	NSP10	NSP10_A1V	A	1	V	1	0.0382	0.0382	0	-0.0618862	28.0531	2.4	0.0618862	28.0531	2.4				0	0	FALSE	FALSE
Early	NSP10	NSP10_A1Y	A	1	Y	1	0.0303	0.0303	-2	-0.036772	92.0953	-3.1	0.036772	92.0953	3.1				0	0	FALSE	FALSE
Early	NSP10	NSP10_A23S	A	23	S	1	0.049	0.049	1	-0.335728	15.9994	-2.6	0.335728	15.9994	2.6				105	0	FALSE	FALSE
Early	NSP10	NSP10_A23T	A	23	T	1	0.0451	0.0451	0	-0.397678	30.026	-2.5	0.397678	30.026	2.5				122	0	FALSE	FALSE
Early	NSP10	NSP10_A24P	A	24	P	1	0.0802	0.0802	-1	0.162654	26.0373	-3.4	0.162654	26.0373	3.4				1	0	FALSE	FALSE
Early	NSP10	NSP10_A24S	A	24	S	1	0.0431	0.0431	1	-0.335728	15.9994	-2.6	0.335728	15.9994	2.6				1328	1	FALSE	FALSE
Early	NSP10	NSP10_A26V	A	26	V	1	0.0516	0.0516	0	-0.0618862	28.0531	2.4	0.0618862	28.0531	2.4				8	0	FALSE	FALSE
Early	NSP10	NSP10_A32D	A	32	D	1	0.0356	0.0356	-2	-1.03147	44.0095	-5.3	1.03147	44.0095	5.3				3	0	FALSE	FALSE
Early	NSP10	NSP10_A32P	A	32	P	1	0.0359	0.0359	-1	0.162654	26.0373	-3.4	0.162654	26.0373	3.4				0	0	FALSE	FALSE
Early	NSP10	NSP10_A32S	A	32	S	3	0.1419	0.4996	1	-0.335728	15.9994	-2.6	0.335728	15.9994	2.6				207	2	FALSE	FALSE
Early	NSP10	NSP10_A4V	A	4	V	1	0.0469	0.0469	0	-0.0618862	28.0531	2.4	0.0618862	28.0531	2.4				1204	1	FALSE	FALSE
Early	NSP10	NSP10_A54E	A	54	E	3	0.0819	0.0829	-1	-0.95381	58.0361	-5.3	0.95381	58.0361	5.3				3	0	FALSE	FALSE
Early	NSP10	NSP10_A9G	A	9	G	1	0.0748	0.0748	0	-0.035773	-14.0266	-2.2	0.035773	14.0266	2.2				9	0	FALSE	FALSE
Early	NSP10	NSP10_C103R	C	103	R	1	0.0317	0.0317	-3	1.00989	53.0428	-7	1.00989	53.0428	7				199	1	FALSE	FALSE
Early	NSP10	NSP10_C117S	C	117	S	1	0.1316	0.1316	-1	-0.290054	-16.0656	-3.3	0.290054	16.0656	3.3				60	0	FALSE	FALSE
Early	NSP10	NSP10_C120D	C	120	D	2	0.05365	0.0579	-3	-0.985797	11.9445	-6	0.985797	11.9445	6				23	2	FALSE	FALSE
Early	NSP10	NSP10_D106I	D	106	I	1	0.0437	0.0437	-3	0.995698	-1.9298	8	0.995698	1.9298	8				0	0	FALSE	FALSE
Early	NSP10	NSP10_D106Y	D	106	Y	1	0.0409	0.0409	-3	0.994699	48.0858	2.2	0.994699	48.0858	2.2				4	0	FALSE	FALSE
Early	NSP10	NSP10_D22G	D	22	G	1	0.041	0.041	-1	0.995698	-58.0361	3.1	0.995698	58.0361	3.1				14	0	FALSE	FALSE
Early	NSP10	NSP10_D22Y	D	22	Y	1	0.0783	0.0783	-3	0.994699	48.0858	2.2	0.994699	48.0858	2.2				9	0	FALSE	FALSE
Early	NSP10	NSP10_D29E	D	29	E	3	0.0305	0.0348	2	0.0776616	14.0266	0	0.0776616	14.0266	0				60	0	FALSE	FALSE
Early	NSP10	NSP10_D29Y	D	29	Y	1	0.0415	0.0415	-3	0.994699	48.0858	2.2	0.994699	48.0858	2.2				21	0	FALSE	FALSE
Early	NSP10	NSP10_D64Y	D	64	Y	1	0.3147	0.3147	-3	0.994699	48.0858	2.2	0.994699	48.0858	2.2				5	0	FALSE	FALSE
Early	NSP10	NSP10_D82Y	D	82	Y	4	0.0311	0.0379	-3	0.994699	48.0858	2.2	0.994699	48.0858	2.2				72	0	FALSE	FALSE
Early	NSP10	NSP10_E135D	E	135	D	2	0.0374	0.0374	2	-0.0776616	-14.0266	0	0.0776616	14.0266	0				8	0	FALSE	FALSE
Early	NSP10	NSP10_E135H	E	135	H	2	0.0343	0.0343	0	1.00521	8.0253	0.3	1.00521	8.0253	0.3				0	0	FALSE	FALSE
Early	NSP10	NSP10_E135P	E	135	P	2	0.0717	0.0717	-1	1.11646	-31.9988	1.9	1.11646	31.9988	1.9				0	0	FALSE	FALSE
Early	NSP10	NSP10_E135V	E	135	V	2	0.0731	0.0731	-2	0.891923	-29.983	7.7	0.891923	29.983	7.7				12	1	FALSE	FALSE
Early	NSP10	NSP10_E135Y	E	135	Y	2	0.0826	0.0826	-2	0.917038	34.0592	2.2	0.917038	34.0592	2.2				0	0	FALSE	FALSE
Early	NSP10	NSP10_E66D	E	66	D	3	0.0417	0.094	2	-0.0776616	-14.0266	0	0.0776616	14.0266	0				191	0	FALSE	FALSE
Early	NSP10	NSP10_E6Q	E	6	Q	1	0.0784	0.0784	2	0.918037	-0.9848	0	0.918037	0.9848	0				4	0	FALSE	FALSE
Early	NSP10	NSP10_F16I	F	16	I	1	0.0393	0.0393	0	0	-34.0162	1.7	0	34.0162	1.7				1	0	FALSE	FALSE
Early	NSP10	NSP10_F16V	F	16	V	1	0.0422	0.0422	-1	-0.0261132	-48.0428	1.4	0.0261132	48.0428	1.4				0	0	FALSE	FALSE
Early	NSP10	NSP10_G127D	G	127	D	1	0.1852	0.1852	-1	-0.995698	58.0361	-3.1	0.995698	58.0361	3.1				17	0	FALSE	FALSE
Early	NSP10	NSP10_G2E	G	2	E	1	0.052	0.052	-2	-0.918037	72.0627	-3.1	0.918037	72.0627	3.1				0	0	FALSE	FALSE
Early	NSP10	NSP10_G34R	G	34	R	1	0.0498	0.0498	-2	0.99999	99.1344	-4.1	0.99999	99.1344	4.1				1262	0	FALSE	FALSE
Early	NSP10	NSP10_G69S	G	69	S	1	0.0639	0.0639	0	-0.299955	30.026	-0.4	0.299955	30.026	0.4				4	0	FALSE	FALSE
Early	NSP10	NSP10_G69V	G	69	V	1	0.297	0.297	-3	-0.0261132	42.0797	4.6	0.0261132	42.0797	4.6				2	0	FALSE	FALSE
Early	NSP10	NSP10_G70R	G	70	R	1	0.1338	0.1338	-2	0.99999	99.1344	-4.1	0.99999	99.1344	4.1				2	0	FALSE	FALSE
Early	NSP10	NSP10_G94C	G	94	C	1	0.0319	0.0319	-3	-0.00990099	46.0916	2.9	0.00990099	46.0916	2.9				157	0	FALSE	FALSE
Early	NSP10	NSP10_H80Q	H	80	Q	1	0.0469	0.0469	0	-0.0871742	-9.0101	-0.3	0.0871742	9.0101	0.3				1	0	FALSE	FALSE
Early	NSP10	NSP10_I99M	I	99	M	1	0.0405	0.0405	1	-0.259747	18.0384	-2.6	0.259747	18.0384	2.6				115	0	FALSE	FALSE
Early	NSP10	NSP10_I99V	I	99	V	1	0.0396	0.0396	3	-0.0261132	-14.0266	-0.3	0.0261132	14.0266	0.3				187	0	FALSE	FALSE
Early	NSP10	NSP10_K113E	K	113	E	1	0.0435	0.0435	1	-1.91704	0.9417	0.4	1.91704	0.9417	0.4				0	0	FALSE	FALSE
Early	NSP10	NSP10_K124I	K	124	I	1	0.0338	0.0338	-3	-0.999001	-15.0147	8.4	0.999001	15.0147	8.4				16	0	FALSE	FALSE
Early	NSP10	NSP10_K25Q	K	25	Q	3	0.033	0.0557	1	-0.999001	-0.0431	0.4	0.999001	0.0431	0.4				0	0	FALSE	FALSE
Early	NSP10	NSP10_K95E	K	95	E	1	0.0905	0.0905	1	-1.91704	0.9417	0.4	1.91704	0.9417	0.4				2	0	FALSE	FALSE
Early	NSP10	NSP10_L133P	L	133	P	10	0.0572	0.0855	-3	0.198427	-16.0424	-5.4	0.198427	16.0424	5.4				10	0	FALSE	FALSE
Early	NSP10	NSP10_L31P	L	31	P	2	0.05535	0.0588	-3	0.198427	-16.0424	-5.4	0.198427	16.0424	5.4				4	0	FALSE	FALSE
Early	NSP10	NSP10_L92F	L	92	F	1	0.0395	0.0395	0	0	34.0162	-1	0	34.0162	1				114	0	FALSE	FALSE
Early	NSP10	NSP10_M122K	M	122	K	1	0.0421	0.0421	-1	1.25875	-3.0237	-5.8	1.25875	3.0237	5.8				15	0	FALSE	FALSE
Early	NSP10	NSP10_M137I	M	137	I	3	0.1629	0.1629	1	0.259747	-18.0384	2.6	0.259747	18.0384	2.6				998	5	FALSE	FALSE
Early	NSP10	NSP10_M137R	M	137	R	1	0.0551	0.0551	-1	1.25974	24.9897	-6.4	1.25974	24.9897	6.4				123	0	FALSE	FALSE
Early	NSP10	NSP10_M44I	M	44	I	2	0.05615	0.0562	1	0.259747	-18.0384	2.6	0.259747	18.0384	2.6				14	0	FALSE	FALSE
Early	NSP10	NSP10_N105I	N	105	I	1	0.0307	0.0307	-3	0	-0.945	8	0	0.945	8				9	0	FALSE	FALSE
Early	NSP10	NSP10_N105Y	N	105	Y	1	0.0364	0.0364	-2	-0.000999001	49.0706	2.2	0.000999001	49.0706	2.2				6	0	FALSE	FALSE
Early	NSP10	NSP10_N10T	N	10	T	1	0.0738	0.0738	0	-0.361905	-12.9987	2.8	0.361905	12.9987	2.8				1	0	FALSE	FALSE
Early	NSP10	NSP10_N10Y	N	10	Y	1	0.0445	0.0445	-2	-0.000999001	49.0706	2.2	0.000999001	49.0706	2.2				1	0	FALSE	FALSE
Early	NSP10	NSP10_N114T	N	114	T	1	0.9227	0.9227	0	-0.361905	-12.9987	2.8	0.361905	12.9987	2.8				117	0	FALSE	FALSE
Early	NSP10	NSP10_N40S	N	40	S	1	0.0706	0.0706	1	-0.299955	-27.0253	2.7	0.299955	27.0253	2.7				152	0	FALSE	FALSE
Early	NSP10	NSP10_N62I	N	62	I	1	0.0478	0.0478	-3	0	-0.945	8	0	0.945	8				9	0	FALSE	FALSE
Early	NSP10	NSP10_P100H	P	100	H	1	0.0386	0.0386	-2	-0.111253	40.0241	-1.6	0.111253	40.0241	1.6				11	0	FALSE	FALSE
Early	NSP10	NSP10_P107H	P	107	H	6	0.0347	0.04	-2	-0.111253	40.0241	-1.6	0.111253	40.0241	1.6				33	0	FALSE	FALSE
Early	NSP10	NSP10_P136S	P	136	S	2	0.104	0.104	-1	-0.498382	-10.0379	0.8	0.498382	10.0379	0.8				1089	13	FALSE	FALSE
Early	NSP10	NSP10_P37Q	P	37	Q	1	0.1307	0.1307	-1	-0.198427	31.014	-1.9	0.198427	31.014	1.9				283	0	FALSE	FALSE
Early	NSP10	NSP10_P37T	P	37	T	1	0.0332	0.0332	-1	-0.560332	3.9887	0.9	0.560332	3.9887	0.9				7	0	FALSE	FALSE
Early	NSP10	NSP10_P86H	P	86	H	1	0.0759	0.0759	-2	-0.111253	40.0241	-1.6	0.111253	40.0241	1.6				73	0	FALSE	FALSE
Early	NSP10	NSP10_Q132R	Q	132	R	2	0.0423	0.0423	1	0.99999	28.0565	-1	0.99999	28.0565	1				71	0	FALSE	FALSE
Early	NSP10	NSP10_Q36R	Q	36	R	1	0.0677	0.0677	1	0.99999	28.0565	-1	0.99999	28.0565	1				481	0	FALSE	FALSE
Early	NSP10	NSP10_Q53H	Q	53	H	1	0.0611	0.0611	0	0.0871742	9.0101	0.3	0.0871742	9.0101	0.3				391	0	FALSE	FALSE
Early	NSP10	NSP10_Q98F	Q	98	F	1	0.0325	0.0325	-3	0	19.0446	6.3	0	19.0446	6.3				0	0	FALSE	FALSE
Early	NSP10	NSP10_S15F	S	15	F	4	0.05555	0.0894	-2	0.299955	60.0965	3.6	0.299955	60.0965	3.6				12	0	FALSE	FALSE
Early	NSP10	NSP10_S67P	S	67	P	1	0.0413	0.0413	-1	0.498382	10.0379	-0.8	0.498382	10.0379	0.8				49	0	FALSE	FALSE
Early	NSP10	NSP10_T118A	T	118	A	1	0.0418	0.0418	0	0.397678	-30.026	2.5	0.397678	30.026	2.5				1237	1	FALSE	FALSE
Early	NSP10	NSP10_T12V	T	12	V	1	0.0671	0.0671	0	0.335792	-1.9729	4.9	0.335792	1.9729	4.9				0	0	FALSE	FALSE
Early	NSP10	NSP10_T47I	T	47	I	2	0.0777	0.1033	-1	0.361905	12.0537	5.2	0.361905	12.0537	5.2				588	1	FALSE	FALSE
Early	NSP10	NSP10_T47P	T	47	P	1	0.033	0.033	-1	0.560332	-3.9887	-0.9	0.560332	3.9887	0.9				4	0	FALSE	FALSE
Early	NSP10	NSP10_T51A	T	51	A	1	0.9716	0.9716	0	0.397678	-30.026	2.5	0.397678	30.026	2.5				107	6	FALSE	FALSE
Early	NSP10	NSP10_V108L	V	108	L	2	0.03085	0.0309	1	0.0261132	14.0266	-0.4	0.0261132	14.0266	0.4				50	0	FALSE	FALSE
Early	NSP10	NSP10_V119A	V	119	A	1	0.0471	0.0471	0	0.0618862	-28.0531	-2.4	0.0618862	28.0531	2.4				75	2	FALSE	FALSE
Early	NSP10	NSP10_V119D	V	119	D	4	0.04835	0.0671	-3	-0.969585	15.9564	-7.7	0.969585	15.9564	7.7				0	0	FALSE	FALSE
Early	NSP10	NSP10_Y27H	Y	27	H	1	0.0698	0.0698	2	0.0881732	-26.0339	-1.9	0.0881732	26.0339	1.9				4	0	FALSE	FALSE
Early	NSP10	NSP10_Y27Q	Y	27	Q	7	0.036	0.057	-1	0.000999001	-35.044	-2.2	0.000999001	35.044	2.2				11	0	FALSE	FALSE
Early	NSP10	NSP10_Y30N	Y	30	N	4	0.03675	0.0452	-2	0.000999001	-49.0706	-2.2	0.000999001	49.0706	2.2				3	1	FALSE	FALSE
Early	NSP11	NSP11_F7C	F	7	C	1	0.0769	0.0769	-2	-0.00990099	-44.0309	-0.3	0.00990099	44.0309	0.3				0	0	FALSE	FALSE
Early	NSP11	NSP11_F7L	F	7	L	1	0.0888	0.0888	0	0	-34.0162	1	0	34.0162	1				0	0	FALSE	FALSE
Early	NSP11	NSP11_F7S	F	7	S	1	0.1952	0.1952	-2	-0.299955	-60.0965	-3.6	0.299955	60.0965	3.6				0	0	FALSE	FALSE
Early	NSP11	NSP11_F7W	F	7	W	1	0.0308	0.0308	1	0	39.0361	-3.7	0	39.0361	3.7				0	0	FALSE	FALSE
Early	NSP11	NSP11_F7Y	F	7	Y	1	0.1148	0.1148	3	-0.000999001	15.9994	-4.1	0.000999001	15.9994	4.1				0	0	FALSE	FALSE
Early	NSP11	NSP11_L8S	L	8	S	1	0.0615	0.0615	-2	-0.299955	-26.0803	-4.6	0.299955	26.0803	4.6				0	0	FALSE	FALSE
Early	NSP11	NSP11_Q5H	Q	5	H	1	0.0305	0.0305	0	0.0871742	9.0101	0.3	0.0871742	9.0101	0.3				0	0	FALSE	FALSE
Early	NSP11	NSP11_Q5I	Q	5	I	2	0.0616	0.0616	-3	0	-14.9716	8	0	14.9716	8				0	0	FALSE	FALSE
Early	NSP11	NSP11_S6L	S	6	L	1	0.2177	0.2177	-2	0.299955	26.0803	4.6	0.299955	26.0803	4.6				0	0	FALSE	FALSE
Early	NSP12	NSP12_A185S	A	185	S	3	0.1216	0.9796	1	-0.335728	15.9994	-2.6	0.335728	15.9994	2.6				31488	8	FALSE	FALSE
Early	NSP12	NSP12_A250D	A	250	D	1	0.0462	0.0462	-2	-1.03147	44.0095	-5.3	1.03147	44.0095	5.3				1	0	FALSE	FALSE
Early	NSP12	NSP12_A250V	A	250	V	3	0.0597	0.0683	0	-0.0618862	28.0531	2.4	0.0618862	28.0531	2.4				17578	8	FALSE	FALSE
Early	NSP12	NSP12_A253T	A	253	T	1	0.066	0.066	0	-0.397678	30.026	-2.5	0.397678	30.026	2.5				38	2	FALSE	FALSE
Early	NSP12	NSP12_A253V	A	253	V	2	0.0785	0.1108	0	-0.0618862	28.0531	2.4	0.0618862	28.0531	2.4				98	7	FALSE	FALSE
Early	NSP12	NSP12_A375V	A	375	V	1	0.0426	0.0426	0	-0.0618862	28.0531	2.4	0.0618862	28.0531	2.4				3	0	FALSE	FALSE
Early	NSP12	NSP12_A379T	A	379	T	1	0.0427	0.0427	0	-0.397678	30.026	-2.5	0.397678	30.026	2.5				228	0	FALSE	FALSE
Early	NSP12	NSP12_A382T	A	382	T	2	0.07365	0.0761	0	-0.397678	30.026	-2.5	0.397678	30.026	2.5				1944	2	FALSE	FALSE
Early	NSP12	NSP12_A399V	A	399	V	1	0.0346	0.0346	0	-0.0618862	28.0531	2.4	0.0618862	28.0531	2.4				56	26	FALSE	FALSE
Early	NSP12	NSP12_A423P	A	423	P	1	0.0902	0.0902	-1	0.162654	26.0373	-3.4	0.162654	26.0373	3.4				6	0	FALSE	FALSE
Early	NSP12	NSP12_A423S	A	423	S	1	0.0462	0.0462	1	-0.335728	15.9994	-2.6	0.335728	15.9994	2.6				95	0	FALSE	FALSE
Early	NSP12	NSP12_A43D	A	43	D	1	0.038	0.038	-2	-1.03147	44.0095	-5.3	1.03147	44.0095	5.3				1	0	FALSE	FALSE
Early	NSP12	NSP12_A43T	A	43	T	1	0.032	0.032	0	-0.397678	30.026	-2.5	0.397678	30.026	2.5				11	4	FALSE	FALSE
Early	NSP12	NSP12_A443P	A	443	P	1	0.0421	0.0421	-1	0.162654	26.0373	-3.4	0.162654	26.0373	3.4				2	0	FALSE	FALSE
Early	NSP12	NSP12_A443S	A	443	S	1	0.0693	0.0693	1	-0.335728	15.9994	-2.6	0.335728	15.9994	2.6				2530	0	FALSE	FALSE
Early	NSP12	NSP12_A46P	A	46	P	2	0.0592	0.0592	-1	0.162654	26.0373	-3.4	0.162654	26.0373	3.4				2	0	FALSE	FALSE
Early	NSP12	NSP12_A512D	A	512	D	1	0.0409	0.0409	-2	-1.03147	44.0095	-5.3	1.03147	44.0095	5.3				4	0	FALSE	FALSE
Early	NSP12	NSP12_A512S	A	512	S	1	0.0647	0.0647	1	-0.335728	15.9994	-2.6	0.335728	15.9994	2.6				51	0	FALSE	FALSE
Early	NSP12	NSP12_A526V	A	526	V	4	0.14815	0.2617	0	-0.0618862	28.0531	2.4	0.0618862	28.0531	2.4				2972	5	FALSE	FALSE
Early	NSP12	NSP12_A529V	A	529	V	1	0.0328	0.0328	0	-0.0618862	28.0531	2.4	0.0618862	28.0531	2.4				21287	9	FALSE	FALSE
Early	NSP12	NSP12_A547V	A	547	V	1	0.0862	0.0862	0	-0.0618862	28.0531	2.4	0.0618862	28.0531	2.4				198	2	FALSE	FALSE
Early	NSP12	NSP12_A554V	A	554	V	1	0.0526	0.0526	0	-0.0618862	28.0531	2.4	0.0618862	28.0531	2.4				680	3	FALSE	FALSE
Early	NSP12	NSP12_A585D	A	585	D	11	0.0408	0.0683	-2	-1.03147	44.0095	-5.3	1.03147	44.0095	5.3				24	0	FALSE	FALSE
Early	NSP12	NSP12_A585S	A	585	S	1	0.0584	0.0584	1	-0.335728	15.9994	-2.6	0.335728	15.9994	2.6				434	1	FALSE	FALSE
Early	NSP12	NSP12_A585V	A	585	V	1	0.0568	0.0568	0	-0.0618862	28.0531	2.4	0.0618862	28.0531	2.4				1806	1	FALSE	FALSE
Early	NSP12	NSP12_A585Y	A	585	Y	6	0.0513	0.0576	-2	-0.036772	92.0953	-3.1	0.036772	92.0953	3.1				0	0	FALSE	FALSE
Early	NSP12	NSP12_A634F	A	634	F	1	0.0479	0.0479	-2	-0.035773	76.0959	1	0.035773	76.0959	1				0	0	FALSE	FALSE
Early	NSP12	NSP12_A634T	A	634	T	1	0.1098	0.1098	0	-0.397678	30.026	-2.5	0.397678	30.026	2.5				22	1	FALSE	FALSE
Early	NSP12	NSP12_A685S	A	685	S	1	0.0715	0.0715	1	-0.335728	15.9994	-2.6	0.335728	15.9994	2.6				181	0	FALSE	FALSE
Early	NSP12	NSP12_A688G	A	688	G	1	0.0543	0.0543	0	-0.035773	-14.0266	-2.2	0.035773	14.0266	2.2				3	0	FALSE	FALSE
Early	NSP12	NSP12_A688V	A	688	V	1	0.0425	0.0425	0	-0.0618862	28.0531	2.4	0.0618862	28.0531	2.4				2	0	FALSE	FALSE
Early	NSP12	NSP12_A690D	A	690	D	1	0.0314	0.0314	-2	-1.03147	44.0095	-5.3	1.03147	44.0095	5.3				1	0	FALSE	FALSE
Early	NSP12	NSP12_A690P	A	690	P	2	0.10165	0.1532	-1	0.162654	26.0373	-3.4	0.162654	26.0373	3.4				1	0	FALSE	FALSE
Early	NSP12	NSP12_A699P	A	699	P	2	0.0436	0.0525	-1	0.162654	26.0373	-3.4	0.162654	26.0373	3.4				14	0	FALSE	FALSE
Early	NSP12	NSP12_A699S	A	699	S	1	0.0313	0.0313	1	-0.335728	15.9994	-2.6	0.335728	15.9994	2.6				1860	2	FALSE	FALSE
Early	NSP12	NSP12_A706D	A	706	D	1	0.1043	0.1043	-2	-1.03147	44.0095	-5.3	1.03147	44.0095	5.3				0	0	FALSE	FALSE
Early	NSP12	NSP12_A706T	A	706	T	5	0.0429	0.0505	0	-0.397678	30.026	-2.5	0.397678	30.026	2.5				349	0	FALSE	FALSE
Early	NSP12	NSP12_A747T	A	747	T	1	0.1018	0.1018	0	-0.397678	30.026	-2.5	0.397678	30.026	2.5				185	1	FALSE	FALSE
Early	NSP12	NSP12_A777S	A	777	S	1	0.0514	0.0514	1	-0.335728	15.9994	-2.6	0.335728	15.9994	2.6				65	1	FALSE	FALSE
Early	NSP12	NSP12_A797S	A	797	S	1	0.1821	0.1821	1	-0.335728	15.9994	-2.6	0.335728	15.9994	2.6				340	0	FALSE	FALSE
Early	NSP12	NSP12_A878V	A	878	V	1	0.0909	0.0909	0	-0.0618862	28.0531	2.4	0.0618862	28.0531	2.4				1278	4	FALSE	FALSE
Early	NSP12	NSP12_A923D	A	923	D	2	0.03285	0.0337	-2	-1.03147	44.0095	-5.3	1.03147	44.0095	5.3				124	0	FALSE	FALSE
Early	NSP12	NSP12_A923S	A	923	S	3	0.0492	0.0496	1	-0.335728	15.9994	-2.6	0.335728	15.9994	2.6				633	1	FALSE	FALSE
Early	NSP12	NSP12_A95S	A	95	S	1	0.0548	0.0548	1	-0.335728	15.9994	-2.6	0.335728	15.9994	2.6				2045	9	FALSE	FALSE
Early	NSP12	NSP12_A95T	A	95	T	2	0.0325	0.0325	0	-0.397678	30.026	-2.5	0.397678	30.026	2.5				135	1	FALSE	FALSE
Early	NSP12	NSP12_A95V	A	95	V	1	0.0591	0.0591	0	-0.0618862	28.0531	2.4	0.0618862	28.0531	2.4				2001	4	FALSE	FALSE
Early	NSP12	NSP12_A97P	A	97	P	2	0.0347	0.0347	-1	0.162654	26.0373	-3.4	0.162654	26.0373	3.4				3	0	FALSE	FALSE
Early	NSP12	NSP12_A97S	A	97	S	1	0.0505	0.0505	1	-0.335728	15.9994	-2.6	0.335728	15.9994	2.6				432	0	FALSE	FALSE
Early	NSP12	NSP12_C152Y	C	152	Y	1	0.1	0.1	-2	0.00890199	60.0303	-3.8	0.00890199	60.0303	3.8				3	0	FALSE	FALSE
Early	NSP12	NSP12_C22G	C	22	G	1	0.075	0.075	-3	0.00990099	-46.0916	-2.9	0.00990099	46.0916	2.9				2	0	FALSE	FALSE
Early	NSP12	NSP12_C298G	C	298	G	1	0.0648	0.0648	-3	0.00990099	-46.0916	-2.9	0.00990099	46.0916	2.9				2	0	FALSE	FALSE
Early	NSP12	NSP12_C298P	C	298	P	1	0.0351	0.0351	-3	0.208328	-6.0277	-4.1	0.208328	6.0277	4.1				1	0	FALSE	FALSE
Early	NSP12	NSP12_C298S	C	298	S	6	0.0402	0.0505	-1	-0.290054	-16.0656	-3.3	0.290054	16.0656	3.3				24	0	FALSE	FALSE
Early	NSP12	NSP12_C298W	C	298	W	1	0.1324	0.1324	-2	0.00990099	83.067	-3.4	0.00990099	83.067	3.4				10	0	FALSE	FALSE
Early	NSP12	NSP12_C298Y	C	298	Y	1	0.0313	0.0313	-2	0.00890199	60.0303	-3.8	0.00890199	60.0303	3.8				2	0	FALSE	FALSE
Early	NSP12	NSP12_C301R	C	301	R	2	0.0496	0.0566	-3	1.00989	53.0428	-7	1.00989	53.0428	7				7	0	FALSE	FALSE
Early	NSP12	NSP12_C306R	C	306	R	1	0.0397	0.0397	-3	1.00989	53.0428	-7	1.00989	53.0428	7				3	0	FALSE	FALSE
Early	NSP12	NSP12_C622F	C	622	F	1	0.0331	0.0331	-2	0.00990099	44.0309	0.3	0.00990099	44.0309	0.3				3	0	FALSE	FALSE
Early	NSP12	NSP12_C669F	C	669	F	1	0.0301	0.0301	-2	0.00990099	44.0309	0.3	0.00990099	44.0309	0.3				10	0	FALSE	FALSE
Early	NSP12	NSP12_C669L	C	669	L	2	0.03535	0.0354	-1	0.00990099	10.0147	1.3	0.00990099	10.0147	1.3				3	0	FALSE	FALSE
Early	NSP12	NSP12_C730F	C	730	F	1	0.042	0.042	-2	0.00990099	44.0309	0.3	0.00990099	44.0309	0.3				636	1	FALSE	FALSE
Early	NSP12	NSP12_C765F	C	765	F	2	0.0577	0.0656	-2	0.00990099	44.0309	0.3	0.00990099	44.0309	0.3				8	0	FALSE	FALSE
Early	NSP12	NSP12_C799F	C	799	F	1	0.07	0.07	-2	0.00990099	44.0309	0.3	0.00990099	44.0309	0.3				105	0	FALSE	FALSE
Early	NSP12	NSP12_C799S	C	799	S	1	0.0744	0.0744	-1	-0.290054	-16.0656	-3.3	0.290054	16.0656	3.3				3	0	FALSE	FALSE
Early	NSP12	NSP12_C842F	C	842	F	3	0.0326	0.0363	-2	0.00990099	44.0309	0.3	0.00990099	44.0309	0.3				14	0	FALSE	FALSE
Early	NSP12	NSP12_C842Y	C	842	Y	3	0.0684	0.0799	-2	0.00890199	60.0303	-3.8	0.00890199	60.0303	3.8				1	0	FALSE	FALSE
Early	NSP12	NSP12_C93S	C	93	S	2	0.0439	0.0439	-1	-0.290054	-16.0656	-3.3	0.290054	16.0656	3.3				164	0	FALSE	FALSE
Early	NSP12	NSP12_D107N	D	107	N	2	0.0579	0.0579	1	0.995698	-0.9848	0	0.995698	0.9848	0				319	0	FALSE	FALSE
Early	NSP12	NSP12_D107Y	D	107	Y	2	0.04125	0.0501	-3	0.994699	48.0858	2.2	0.994699	48.0858	2.2				162	0	FALSE	FALSE
Early	NSP12	NSP12_D140Y	D	140	Y	1	0.0484	0.0484	-3	0.994699	48.0858	2.2	0.994699	48.0858	2.2				1980	7	FALSE	FALSE
Early	NSP12	NSP12_D155K	D	155	K	1	0.0329	0.0329	-1	1.9947	13.0849	-0.4	1.9947	13.0849	0.4				16	0	FALSE	FALSE
Early	NSP12	NSP12_D155Y	D	155	Y	2	0.0405	0.0405	-3	0.994699	48.0858	2.2	0.994699	48.0858	2.2				58	0	FALSE	FALSE
Early	NSP12	NSP12_D161A	D	161	A	1	0.1538	0.1538	-2	1.03147	-44.0095	5.3	1.03147	44.0095	5.3				23	1	FALSE	FALSE
Early	NSP12	NSP12_D170Y	D	170	Y	4	0.03495	0.0479	-3	0.994699	48.0858	2.2	0.994699	48.0858	2.2				503	0	FALSE	FALSE
Early	NSP12	NSP12_D208H	D	208	H	1	0.1424	0.1424	-1	1.08287	22.0519	0.3	1.08287	22.0519	0.3				3	0	FALSE	FALSE
Early	NSP12	NSP12_D208V	D	208	V	1	0.0506	0.0506	-3	0.969585	-15.9564	7.7	0.969585	15.9564	7.7				3	0	FALSE	FALSE
Early	NSP12	NSP12_D208Y	D	208	Y	1	0.2362	0.2362	-3	0.994699	48.0858	2.2	0.994699	48.0858	2.2				10	1	FALSE	FALSE
Early	NSP12	NSP12_D211Y	D	211	Y	4	0.05835	0.0796	-3	0.994699	48.0858	2.2	0.994699	48.0858	2.2				36	0	FALSE	FALSE
Early	NSP12	NSP12_D218E	D	218	E	1	0.0339	0.0339	2	0.0776616	14.0266	0	0.0776616	14.0266	0				1	0	FALSE	FALSE
Early	NSP12	NSP12_D221E	D	221	E	2	0.0357	0.0406	2	0.0776616	14.0266	0	0.0776616	14.0266	0				2	0	FALSE	FALSE
Early	NSP12	NSP12_D269Y	D	269	Y	1	0.1618	0.1618	-3	0.994699	48.0858	2.2	0.994699	48.0858	2.2				21	0	FALSE	FALSE
Early	NSP12	NSP12_D291H	D	291	H	3	0.0492	0.0877	-1	1.08287	22.0519	0.3	1.08287	22.0519	0.3				1	0	FALSE	FALSE
Early	NSP12	NSP12_D291N	D	291	N	4	0.04295	0.056	1	0.995698	-0.9848	0	0.995698	0.9848	0				2	0	FALSE	FALSE
Early	NSP12	NSP12_D29S	D	29	S	1	0.0311	0.0311	0	0.695743	-28.0101	2.7	0.695743	28.0101	2.7				71	1	FALSE	FALSE
Early	NSP12	NSP12_D29Y	D	29	Y	1	0.0546	0.0546	-3	0.994699	48.0858	2.2	0.994699	48.0858	2.2				5	0	FALSE	FALSE
Early	NSP12	NSP12_D304V	D	304	V	1	0.0304	0.0304	-3	0.969585	-15.9564	7.7	0.969585	15.9564	7.7				0	0	FALSE	FALSE
Early	NSP12	NSP12_D336Y	D	336	Y	1	0.0676	0.0676	-3	0.994699	48.0858	2.2	0.994699	48.0858	2.2				5	1	FALSE	FALSE
Early	NSP12	NSP12_D358V	D	358	V	1	0.0655	0.0655	-3	0.969585	-15.9564	7.7	0.969585	15.9564	7.7				3	0	FALSE	FALSE
Early	NSP12	NSP12_D358Y	D	358	Y	1	0.0345	0.0345	-3	0.994699	48.0858	2.2	0.994699	48.0858	2.2				211	1	FALSE	FALSE
Early	NSP12	NSP12_D36I	D	36	I	2	0.0798	0.0798	-3	0.995698	-1.9298	8	0.995698	1.9298	8				0	0	FALSE	FALSE
Early	NSP12	NSP12_D36Y	D	36	Y	1	0.1179	0.1179	-3	0.994699	48.0858	2.2	0.994699	48.0858	2.2				2	0	FALSE	FALSE
Early	NSP12	NSP12_D377A	D	377	A	1	0.0323	0.0323	-2	1.03147	-44.0095	5.3	1.03147	44.0095	5.3				0	0	FALSE	FALSE
Early	NSP12	NSP12_D418H	D	418	H	1	0.0305	0.0305	-1	1.08287	22.0519	0.3	1.08287	22.0519	0.3				139	0	FALSE	FALSE
Early	NSP12	NSP12_D418Y	D	418	Y	1	0.0957	0.0957	-3	0.994699	48.0858	2.2	0.994699	48.0858	2.2				22	0	FALSE	FALSE
Early	NSP12	NSP12_D421A	D	421	A	1	0.1295	0.1295	-2	1.03147	-44.0095	5.3	1.03147	44.0095	5.3				22	0	FALSE	FALSE
Early	NSP12	NSP12_D445Y	D	445	Y	1	0.048	0.048	-3	0.994699	48.0858	2.2	0.994699	48.0858	2.2				35	2	FALSE	FALSE
Early	NSP12	NSP12_D452V	D	452	V	1	0.0656	0.0656	-3	0.969585	-15.9564	7.7	0.969585	15.9564	7.7				0	0	FALSE	FALSE
Early	NSP12	NSP12_D452Y	D	452	Y	1	0.0387	0.0387	-3	0.994699	48.0858	2.2	0.994699	48.0858	2.2				128	1	FALSE	FALSE
Early	NSP12	NSP12_D454N	D	454	N	2	0.03835	0.0459	1	0.995698	-0.9848	0	0.995698	0.9848	0				23	0	FALSE	FALSE
Early	NSP12	NSP12_D465H	D	465	H	1	0.061	0.061	-1	1.08287	22.0519	0.3	1.08287	22.0519	0.3				0	0	FALSE	FALSE
Early	NSP12	NSP12_D465Y	D	465	Y	1	0.0493	0.0493	-3	0.994699	48.0858	2.2	0.994699	48.0858	2.2				3	0	FALSE	FALSE
Early	NSP12	NSP12_D481H	D	481	H	1	0.0353	0.0353	-1	1.08287	22.0519	0.3	1.08287	22.0519	0.3				0	0	FALSE	FALSE
Early	NSP12	NSP12_D517Y	D	517	Y	1	0.06	0.06	-3	0.994699	48.0858	2.2	0.994699	48.0858	2.2				10	0	FALSE	FALSE
Early	NSP12	NSP12_D523A	D	523	A	1	0.032	0.032	-2	1.03147	-44.0095	5.3	1.03147	44.0095	5.3				75	0	FALSE	FALSE
Early	NSP12	NSP12_D523E	D	523	E	1	0.0358	0.0358	2	0.0776616	14.0266	0	0.0776616	14.0266	0				5	0	FALSE	FALSE
Early	NSP12	NSP12_D525Y	D	525	Y	1	0.0306	0.0306	-3	0.994699	48.0858	2.2	0.994699	48.0858	2.2				4	0	FALSE	FALSE
Early	NSP12	NSP12_D618G	D	618	G	2	0.0394	0.0441	-1	0.995698	-58.0361	3.1	0.995698	58.0361	3.1				1	0	FALSE	FALSE
Early	NSP12	NSP12_D623G	D	623	G	1	0.0343	0.0343	-1	0.995698	-58.0361	3.1	0.995698	58.0361	3.1				0	0	FALSE	FALSE
Early	NSP12	NSP12_D62G	D	62	G	1	0.0394	0.0394	-1	0.995698	-58.0361	3.1	0.995698	58.0361	3.1				1526	1	FALSE	FALSE
Early	NSP12	NSP12_D67Y	D	67	Y	1	0.1294	0.1294	-3	0.994699	48.0858	2.2	0.994699	48.0858	2.2				88	1	FALSE	FALSE
Early	NSP12	NSP12_D684G	D	684	G	1	0.0464	0.0464	-1	0.995698	-58.0361	3.1	0.995698	58.0361	3.1				0	0	FALSE	FALSE
Early	NSP12	NSP12_D711Y	D	711	Y	1	0.0889	0.0889	-3	0.994699	48.0858	2.2	0.994699	48.0858	2.2				40	3	FALSE	FALSE
Early	NSP12	NSP12_D761H	D	761	H	1	0.0747	0.0747	-1	1.08287	22.0519	0.3	1.08287	22.0519	0.3				0	0	FALSE	FALSE
Early	NSP12	NSP12_D824V	D	824	V	1	0.3267	0.3267	-3	0.969585	-15.9564	7.7	0.969585	15.9564	7.7				8	0	FALSE	FALSE
Early	NSP12	NSP12_D824Y	D	824	Y	14	0.04285	0.9965	-3	0.994699	48.0858	2.2	0.994699	48.0858	2.2				2477	9	FALSE	FALSE
Early	NSP12	NSP12_D825V	D	825	V	1	0.0369	0.0369	-3	0.969585	-15.9564	7.7	0.969585	15.9564	7.7				3	0	FALSE	FALSE
Early	NSP12	NSP12_D825Y	D	825	Y	11	0.0378	0.0599	-3	0.994699	48.0858	2.2	0.994699	48.0858	2.2				63	1	FALSE	FALSE
Early	NSP12	NSP12_D833N	D	833	N	1	0.142	0.142	1	0.995698	-0.9848	0	0.995698	0.9848	0				546	1	FALSE	FALSE
Early	NSP12	NSP12_D845V	D	845	V	1	0.0612	0.0612	-3	0.969585	-15.9564	7.7	0.969585	15.9564	7.7				0	0	FALSE	FALSE
Early	NSP12	NSP12_D846Y	D	846	Y	1	0.0327	0.0327	-3	0.994699	48.0858	2.2	0.994699	48.0858	2.2				27	1	FALSE	FALSE
Early	NSP12	NSP12_D851A	D	851	A	14	0.0853	0.1123	-2	1.03147	-44.0095	5.3	1.03147	44.0095	5.3				2	0	FALSE	FALSE
Early	NSP12	NSP12_D893Y	D	893	Y	1	0.0353	0.0353	-3	0.994699	48.0858	2.2	0.994699	48.0858	2.2				1647	11	FALSE	FALSE
Early	NSP12	NSP12_D901N	D	901	N	2	0.03335	0.0349	1	0.995698	-0.9848	0	0.995698	0.9848	0				16	2	FALSE	FALSE
Early	NSP12	NSP12_D901Y	D	901	Y	1	0.06	0.06	-3	0.994699	48.0858	2.2	0.994699	48.0858	2.2				55	3	FALSE	FALSE
Early	NSP12	NSP12_D92A	D	92	A	1	0.0305	0.0305	-2	1.03147	-44.0095	5.3	1.03147	44.0095	5.3				57	0	FALSE	FALSE
Early	NSP12	NSP12_E167A	E	167	A	1	0.1176	0.1176	-1	0.95381	-58.0361	5.3	0.95381	58.0361	5.3				25	0	FALSE	FALSE
Early	NSP12	NSP12_E167G	E	167	G	1	0.1028	0.1028	-2	0.918037	-72.0627	3.1	0.918037	72.0627	3.1				44	0	FALSE	FALSE
Early	NSP12	NSP12_E167T	E	167	T	2	0.0542	0.0542	-1	0.556132	-28.0101	2.8	0.556132	28.0101	2.8				0	0	FALSE	FALSE
Early	NSP12	NSP12_E180D	E	180	D	2	0.0765	0.0971	2	-0.0776616	-14.0266	0	0.0776616	14.0266	0				14	0	FALSE	FALSE
Early	NSP12	NSP12_E431G	E	431	G	1	0.0316	0.0316	-2	0.918037	-72.0627	3.1	0.918037	72.0627	3.1				30	0	FALSE	FALSE
Early	NSP12	NSP12_E436K	E	436	K	1	0.0556	0.0556	1	1.91704	-0.9417	-0.4	1.91704	0.9417	0.4				98	1	FALSE	FALSE
Early	NSP12	NSP12_E522Q	E	522	Q	1	0.0565	0.0565	2	0.918037	-0.9848	0	0.918037	0.9848	0				54	0	FALSE	FALSE
Early	NSP12	NSP12_E61V	E	61	V	1	0.2124	0.2124	-2	0.891923	-29.983	7.7	0.891923	29.983	7.7				44	0	FALSE	FALSE
Early	NSP12	NSP12_E729Q	E	729	Q	1	0.0873	0.0873	2	0.918037	-0.9848	0	0.918037	0.9848	0				3	0	FALSE	FALSE
Early	NSP12	NSP12_E744V	E	744	V	1	0.0392	0.0392	-2	0.891923	-29.983	7.7	0.891923	29.983	7.7				47	0	FALSE	FALSE
Early	NSP12	NSP12_E802D	E	802	D	1	0.0699	0.0699	2	-0.0776616	-14.0266	0	0.0776616	14.0266	0				137	1	FALSE	FALSE
Early	NSP12	NSP12_E811S	E	811	S	1	0.0606	0.0606	0	0.618082	-42.0367	2.7	0.618082	42.0367	2.7				1	0	FALSE	FALSE
Early	NSP12	NSP12_E811T	E	811	T	1	0.0758	0.0758	-1	0.556132	-28.0101	2.8	0.556132	28.0101	2.8				0	0	FALSE	FALSE
Early	NSP12	NSP12_E83K	E	83	K	1	0.1316	0.1316	1	1.91704	-0.9417	-0.4	1.91704	0.9417	0.4				44	3	FALSE	FALSE
Early	NSP12	NSP12_E83R	E	83	R	3	0.0317	0.0344	0	1.91803	27.0717	-1	1.91803	27.0717	1				0	0	FALSE	FALSE
Early	NSP12	NSP12_E84K	E	84	K	1	0.06	0.06	1	1.91704	-0.9417	-0.4	1.91704	0.9417	0.4				261	0	FALSE	FALSE
Early	NSP12	NSP12_E922Q	E	922	Q	1	0.0303	0.0303	2	0.918037	-0.9848	0	0.918037	0.9848	0				9	0	FALSE	FALSE
Early	NSP12	NSP12_F102S	F	102	S	1	0.0348	0.0348	-2	-0.299955	-60.0965	-3.6	0.299955	60.0965	3.6				3	0	FALSE	FALSE
Early	NSP12	NSP12_F134L	F	134	L	1	0.0385	0.0385	0	0	-34.0162	1	0	34.0162	1				5	0	FALSE	FALSE
Early	NSP12	NSP12_F165N	F	165	N	1	0.0897	0.0897	-3	0	-33.0712	-6.3	0	33.0712	6.3				0	0	FALSE	FALSE
Early	NSP12	NSP12_F165S	F	165	S	1	0.0448	0.0448	-2	-0.299955	-60.0965	-3.6	0.299955	60.0965	3.6				13	0	FALSE	FALSE
Early	NSP12	NSP12_F165Y	F	165	Y	1	0.056	0.056	3	-0.000999001	15.9994	-4.1	0.000999001	15.9994	4.1				33	1	FALSE	FALSE
Early	NSP12	NSP12_F219I	F	219	I	1	0.0392	0.0392	0	0	-34.0162	1.7	0	34.0162	1.7				2	0	FALSE	FALSE
Early	NSP12	NSP12_F222I	F	222	I	2	0.03465	0.0392	0	0	-34.0162	1.7	0	34.0162	1.7				1	0	FALSE	FALSE
Early	NSP12	NSP12_F321L	F	321	L	1	0.04	0.04	0	0	-34.0162	1	0	34.0162	1				124	1	FALSE	FALSE
Early	NSP12	NSP12_F321S	F	321	S	1	0.0562	0.0562	-2	-0.299955	-60.0965	-3.6	0.299955	60.0965	3.6				3	0	FALSE	FALSE
Early	NSP12	NSP12_F35I	F	35	I	2	0.0726	0.0726	0	0	-34.0162	1.7	0	34.0162	1.7				5	0	FALSE	FALSE
Early	NSP12	NSP12_F35Y	F	35	Y	3	0.0838	0.0838	3	-0.000999001	15.9994	-4.1	0.000999001	15.9994	4.1				1	0	FALSE	FALSE
Early	NSP12	NSP12_F396L	F	396	L	1	0.1718	0.1718	0	0	-34.0162	1	0	34.0162	1				30	0	FALSE	FALSE
Early	NSP12	NSP12_F396Y	F	396	Y	1	0.0698	0.0698	3	-0.000999001	15.9994	-4.1	0.000999001	15.9994	4.1				2	0	FALSE	FALSE
Early	NSP12	NSP12_F415I	F	415	I	6	0.0371	0.067	0	0	-34.0162	1.7	0	34.0162	1.7				3	1	FALSE	FALSE
Early	NSP12	NSP12_F415Q	F	415	Q	1	0.0495	0.0495	-3	0	-19.0446	-6.3	0	19.0446	6.3				0	0	FALSE	FALSE
Early	NSP12	NSP12_F415S	F	415	S	4	0.04665	0.1233	-2	-0.299955	-60.0965	-3.6	0.299955	60.0965	3.6				0	18	FALSE	FALSE
Early	NSP12	NSP12_F428I	F	428	I	2	0.08	0.08	0	0	-34.0162	1.7	0	34.0162	1.7				2	0	FALSE	FALSE
Early	NSP12	NSP12_F428P	F	428	P	2	0.06	0.06	-4	0.198427	-50.0586	-4.4	0.198427	50.0586	4.4				0	0	FALSE	FALSE
Early	NSP12	NSP12_F45S	F	45	S	2	0.0701	0.0701	-2	-0.299955	-60.0965	-3.6	0.299955	60.0965	3.6				4	0	FALSE	FALSE
Early	NSP12	NSP12_F471Y	F	471	Y	1	0.0507	0.0507	3	-0.000999001	15.9994	-4.1	0.000999001	15.9994	4.1				16	0	FALSE	FALSE
Early	NSP12	NSP12_F504L	F	504	L	1	0.0526	0.0526	0	0	-34.0162	1	0	34.0162	1				25	0	FALSE	FALSE
Early	NSP12	NSP12_F504P	F	504	P	1	0.0745	0.0745	-4	0.198427	-50.0586	-4.4	0.198427	50.0586	4.4				0	0	FALSE	FALSE
Early	NSP12	NSP12_F506H	F	506	H	1	0.0411	0.0411	-1	0.0871742	-10.0345	-6	0.0871742	10.0345	6				1	0	FALSE	FALSE
Early	NSP12	NSP12_F528L	F	528	L	1	0.0488	0.0488	0	0	-34.0162	1	0	34.0162	1				9	0	FALSE	FALSE
Early	NSP12	NSP12_F528S	F	528	S	1	0.0347	0.0347	-2	-0.299955	-60.0965	-3.6	0.299955	60.0965	3.6				4	0	FALSE	FALSE
Early	NSP12	NSP12_F571L	F	571	L	2	0.0849	0.0849	0	0	-34.0162	1	0	34.0162	1				1	0	FALSE	FALSE
Early	NSP12	NSP12_F741L	F	741	L	1	0.0387	0.0387	0	0	-34.0162	1	0	34.0162	1				132	1	FALSE	FALSE
Early	NSP12	NSP12_F741Y	F	741	Y	2	0.03125	0.0313	3	-0.000999001	15.9994	-4.1	0.000999001	15.9994	4.1				20	0	FALSE	FALSE
Early	NSP12	NSP12_F77V	F	77	V	2	0.0368	0.0398	-1	-0.0261132	-48.0428	1.4	0.0261132	48.0428	1.4				37	0	FALSE	FALSE
Early	NSP12	NSP12_F782L	F	782	L	1	0.0582	0.0582	0	0	-34.0162	1	0	34.0162	1				351	0	FALSE	FALSE
Early	NSP12	NSP12_F7C	F	7	C	1	0.0769	0.0769	-2	-0.00990099	-44.0309	-0.3	0.00990099	44.0309	0.3				0	0	FALSE	FALSE
Early	NSP12	NSP12_F7L	F	7	L	1	0.0888	0.0888	0	0	-34.0162	1	0	34.0162	1				11	0	FALSE	FALSE
Early	NSP12	NSP12_F7S	F	7	S	1	0.1952	0.1952	-2	-0.299955	-60.0965	-3.6	0.299955	60.0965	3.6				1	0	FALSE	FALSE
Early	NSP12	NSP12_F7W	F	7	W	1	0.0308	0.0308	1	0	39.0361	-3.7	0	39.0361	3.7				0	0	FALSE	FALSE
Early	NSP12	NSP12_F7Y	F	7	Y	1	0.1148	0.1148	3	-0.000999001	15.9994	-4.1	0.000999001	15.9994	4.1				0	0	FALSE	FALSE
Early	NSP12	NSP12_F843I	F	843	I	2	0.033	0.0352	0	0	-34.0162	1.7	0	34.0162	1.7				1	0	FALSE	FALSE
Early	NSP12	NSP12_F859I	F	859	I	1	0.0373	0.0373	0	0	-34.0162	1.7	0	34.0162	1.7				0	0	FALSE	FALSE
Early	NSP12	NSP12_F881L	F	881	L	1	0.0818	0.0818	0	0	-34.0162	1	0	34.0162	1				7	0	FALSE	FALSE
Early	NSP12	NSP12_G200S	G	200	S	1	0.0463	0.0463	0	-0.299955	30.026	-0.4	0.299955	30.026	0.4				2	0	FALSE	FALSE
Early	NSP12	NSP12_G203V	G	203	V	2	0.1182	0.1499	-3	-0.0261132	42.0797	4.6	0.0261132	42.0797	4.6				3	0	FALSE	FALSE
Early	NSP12	NSP12_G220A	G	220	A	1	0.0516	0.0516	0	0.035773	14.0266	2.2	0.035773	14.0266	2.2				0	0	FALSE	FALSE
Early	NSP12	NSP12_G220C	G	220	C	1	0.0362	0.0362	-3	-0.00990099	46.0916	2.9	0.00990099	46.0916	2.9				134	1	FALSE	FALSE
Early	NSP12	NSP12_G220S	G	220	S	1	0.0746	0.0746	0	-0.299955	30.026	-0.4	0.299955	30.026	0.4				2	0	FALSE	FALSE
Early	NSP12	NSP12_G220T	G	220	T	1	0.0382	0.0382	-2	-0.361905	44.0526	-0.3	0.361905	44.0526	0.3				0	0	FALSE	FALSE
Early	NSP12	NSP12_G220V	G	220	V	2	0.04575	0.0595	-3	-0.0261132	42.0797	4.6	0.0261132	42.0797	4.6				6	0	FALSE	FALSE
Early	NSP12	NSP12_G228A	G	228	A	1	0.0312	0.0312	0	0.035773	14.0266	2.2	0.035773	14.0266	2.2				52	0	FALSE	FALSE
Early	NSP12	NSP12_G230V	G	230	V	1	0.0432	0.0432	-3	-0.0261132	42.0797	4.6	0.0261132	42.0797	4.6				5	0	FALSE	FALSE
Early	NSP12	NSP12_G23C	G	23	C	1	0.0809	0.0809	-3	-0.00990099	46.0916	2.9	0.00990099	46.0916	2.9				139	1	FALSE	FALSE
Early	NSP12	NSP12_G23S	G	23	S	1	0.2305	0.2305	0	-0.299955	30.026	-0.4	0.299955	30.026	0.4				13	0	FALSE	FALSE
Early	NSP12	NSP12_G385S	G	385	S	3	0.0625	0.0788	0	-0.299955	30.026	-0.4	0.299955	30.026	0.4				7071	4	FALSE	FALSE
Early	NSP12	NSP12_G413A	G	413	A	2	0.0349	0.0349	0	0.035773	14.0266	2.2	0.035773	14.0266	2.2				3	0	FALSE	FALSE
Early	NSP12	NSP12_G413D	G	413	D	3	0.0465	0.21	-1	-0.995698	58.0361	-3.1	0.995698	58.0361	3.1				2	0	FALSE	FALSE
Early	NSP12	NSP12_G413K	G	413	K	1	0.0839	0.0839	-2	0.999001	71.121	-3.5	0.999001	71.121	3.5				0	0	FALSE	FALSE
Early	NSP12	NSP12_G413S	G	413	S	2	0.0349	0.0349	0	-0.299955	30.026	-0.4	0.299955	30.026	0.4				64	1	FALSE	FALSE
Early	NSP12	NSP12_G413V	G	413	V	1	0.0567	0.0567	-3	-0.0261132	42.0797	4.6	0.0261132	42.0797	4.6				20	0	FALSE	FALSE
Early	NSP12	NSP12_G427A	G	427	A	2	0.0777	0.0777	0	0.035773	14.0266	2.2	0.035773	14.0266	2.2				1	0	FALSE	FALSE
Early	NSP12	NSP12_G427C	G	427	C	1	0.0342	0.0342	-3	-0.00990099	46.0916	2.9	0.00990099	46.0916	2.9				4	0	FALSE	FALSE
Early	NSP12	NSP12_G446D	G	446	D	1	0.167	0.167	-1	-0.995698	58.0361	-3.1	0.995698	58.0361	3.1				0	0	FALSE	FALSE
Early	NSP12	NSP12_G44D	G	44	D	1	0.0371	0.0371	-1	-0.995698	58.0361	-3.1	0.995698	58.0361	3.1				1	0	FALSE	FALSE
Early	NSP12	NSP12_G44V	G	44	V	1	0.035	0.035	-3	-0.0261132	42.0797	4.6	0.0261132	42.0797	4.6				766	11	FALSE	FALSE
Early	NSP12	NSP12_G584I	G	584	I	1	0.032	0.032	-4	0	56.1063	4.9	0	56.1063	4.9				0	0	FALSE	FALSE
Early	NSP12	NSP12_G590R	G	590	R	2	0.0965	0.0965	-2	0.99999	99.1344	-4.1	0.99999	99.1344	4.1				0	0	FALSE	FALSE
Early	NSP12	NSP12_G590V	G	590	V	1	0.0828	0.0828	-3	-0.0261132	42.0797	4.6	0.0261132	42.0797	4.6				1	0	FALSE	FALSE
Early	NSP12	NSP12_G597C	G	597	C	1	0.1012	0.1012	-3	-0.00990099	46.0916	2.9	0.00990099	46.0916	2.9				26	0	FALSE	FALSE
Early	NSP12	NSP12_G670C	G	670	C	1	0.0357	0.0357	-3	-0.00990099	46.0916	2.9	0.00990099	46.0916	2.9				179	0	FALSE	FALSE
Early	NSP12	NSP12_G679Q	G	679	Q	1	0.0358	0.0358	-2	0	71.0779	-3.1	0	71.0779	3.1				4	0	FALSE	FALSE
Early	NSP12	NSP12_G683V	G	683	V	1	0.137	0.137	-3	-0.0261132	42.0797	4.6	0.0261132	42.0797	4.6				4	0	FALSE	FALSE
Early	NSP12	NSP12_G712C	G	712	C	1	0.0455	0.0455	-3	-0.00990099	46.0916	2.9	0.00990099	46.0916	2.9				11	0	FALSE	FALSE
Early	NSP12	NSP12_G712V	G	712	V	1	0.0485	0.0485	-3	-0.0261132	42.0797	4.6	0.0261132	42.0797	4.6				180	2	FALSE	FALSE
Early	NSP12	NSP12_G823K	G	823	K	1	0.0362	0.0362	-2	0.999001	71.121	-3.5	0.999001	71.121	3.5				0	0	FALSE	FALSE
Early	NSP12	NSP12_G839W	G	839	W	1	0.0387	0.0387	-2	0	129.159	-0.5	0	129.159	0.5				2	0	FALSE	FALSE
Early	NSP12	NSP12_G841I	G	841	I	1	0.034	0.034	-4	0	56.1063	4.9	0	56.1063	4.9				1	0	FALSE	FALSE
Early	NSP12	NSP12_G841V	G	841	V	1	0.0745	0.0745	-3	-0.0261132	42.0797	4.6	0.0261132	42.0797	4.6				4	0	FALSE	FALSE
Early	NSP12	NSP12_G852D	G	852	D	1	0.0883	0.0883	-1	-0.995698	58.0361	-3.1	0.995698	58.0361	3.1				0	1	FALSE	FALSE
Early	NSP12	NSP12_H295S	H	295	S	1	0.0316	0.0316	-1	-0.387129	-50.062	2.4	0.387129	50.062	2.4				1	0	FALSE	FALSE
Early	NSP12	NSP12_H295Y	H	295	Y	1	0.0882	0.0882	2	-0.0881732	26.0339	1.9	0.0881732	26.0339	1.9				362	2	FALSE	FALSE
Early	NSP12	NSP12_H309L	H	309	L	1	0.0364	0.0364	-3	-0.0871742	-23.9817	7	0.0871742	23.9817	7				0	0	FALSE	FALSE
Early	NSP12	NSP12_H362P	H	362	P	2	0.03465	0.0376	-2	0.111253	-40.0241	1.6	0.111253	40.0241	1.6				0	1	FALSE	FALSE
Early	NSP12	NSP12_H381Q	H	381	Q	1	0.0625	0.0625	0	-0.0871742	-9.0101	-0.3	0.0871742	9.0101	0.3				0	0	FALSE	FALSE
Early	NSP12	NSP12_H572Y	H	572	Y	2	0.0859	0.0859	2	-0.0881732	26.0339	1.9	0.0881732	26.0339	1.9				309	2	FALSE	FALSE
Early	NSP12	NSP12_H613Q	H	613	Q	2	0.0523	0.0587	0	-0.0871742	-9.0101	-0.3	0.0871742	9.0101	0.3				454	0	FALSE	FALSE
Early	NSP12	NSP12_H752L	H	752	L	1	0.0521	0.0521	-3	-0.0871742	-23.9817	7	0.0871742	23.9817	7				3	0	FALSE	FALSE
Early	NSP12	NSP12_H75K	H	75	K	2	0.0336	0.0371	-1	0.911827	-8.967	-0.7	0.911827	8.967	0.7				1	0	FALSE	FALSE
Early	NSP12	NSP12_H75R	H	75	R	1	0.0376	0.0376	0	0.912816	19.0464	-1.3	0.912816	19.0464	1.3				8	0	FALSE	FALSE
Early	NSP12	NSP12_H810Q	H	810	Q	1	0.1468	0.1468	0	-0.0871742	-9.0101	-0.3	0.0871742	9.0101	0.3				88	0	FALSE	FALSE
Early	NSP12	NSP12_H810Y	H	810	Y	1	0.2684	0.2684	2	-0.0881732	26.0339	1.9	0.0881732	26.0339	1.9				198	0	FALSE	FALSE
Early	NSP12	NSP12_H816Y	H	816	Y	1	0.0863	0.0863	2	-0.0881732	26.0339	1.9	0.0881732	26.0339	1.9				255	1	FALSE	FALSE
Early	NSP12	NSP12_H82Q	H	82	Q	17	0.1032	0.1947	0	-0.0871742	-9.0101	-0.3	0.0871742	9.0101	0.3				166	8	FALSE	FALSE
Early	NSP12	NSP12_H82V	H	82	V	5	0.0366	0.0402	-3	-0.113287	-38.0083	7.4	0.113287	38.0083	7.4				0	0	FALSE	FALSE
Early	NSP12	NSP12_H892Y	H	892	Y	2	0.49025	0.9128	2	-0.0881732	26.0339	1.9	0.0881732	26.0339	1.9				303	3	FALSE	FALSE
Early	NSP12	NSP12_H898Y	H	898	Y	1	0.0972	0.0972	2	-0.0881732	26.0339	1.9	0.0881732	26.0339	1.9				8	2	FALSE	FALSE
Early	NSP12	NSP12_I114L	I	114	L	18	0.1192	0.2672	2	0	0	-0.7	0	0	0.7				10	0	FALSE	FALSE
Early	NSP12	NSP12_I114V	I	114	V	1	0.0609	0.0609	3	-0.0261132	-14.0266	-0.3	0.0261132	14.0266	0.3				80	1	FALSE	FALSE
Early	NSP12	NSP12_I244L	I	244	L	1	0.0333	0.0333	2	0	0	-0.7	0	0	0.7				17	1	FALSE	FALSE
Early	NSP12	NSP12_I266V	I	266	V	2	0.03615	0.0382	3	-0.0261132	-14.0266	-0.3	0.0261132	14.0266	0.3				682	1	FALSE	FALSE
Early	NSP12	NSP12_I333T	I	333	T	6	0.0417	0.0458	-1	-0.361905	-12.0537	-5.2	0.361905	12.0537	5.2				20	2	FALSE	FALSE
Early	NSP12	NSP12_I450L	I	450	L	1	0.0948	0.0948	2	0	0	-0.7	0	0	0.7				12	0	FALSE	FALSE
Early	NSP12	NSP12_I450M	I	450	M	1	0.0382	0.0382	1	-0.259747	18.0384	-2.6	0.259747	18.0384	2.6				3	0	FALSE	FALSE
Early	NSP12	NSP12_I450N	I	450	N	1	0.0308	0.0308	-3	0	0.945	-8	0	0.945	8				1	0	FALSE	FALSE
Early	NSP12	NSP12_I450P	I	450	P	1	0.0603	0.0603	-3	0.198427	-16.0424	-6.1	0.198427	16.0424	6.1				0	0	FALSE	FALSE
Early	NSP12	NSP12_I450R	I	450	R	1	0.0899	0.0899	-3	0.99999	43.0281	-9	0.99999	43.0281	9				0	0	FALSE	FALSE
Early	NSP12	NSP12_I450S	I	450	S	1	0.0481	0.0481	-2	-0.299955	-26.0803	-5.3	0.299955	26.0803	5.3				2	0	FALSE	FALSE
Early	NSP12	NSP12_I450T	I	450	T	1	0.1244	0.1244	-1	-0.361905	-12.0537	-5.2	0.361905	12.0537	5.2				88	0	FALSE	FALSE
Early	NSP12	NSP12_I450V	I	450	V	1	0.0678	0.0678	3	-0.0261132	-14.0266	-0.3	0.0261132	14.0266	0.3				448	0	FALSE	FALSE
Early	NSP12	NSP12_I466M	I	466	M	1	0.0306	0.0306	1	-0.259747	18.0384	-2.6	0.259747	18.0384	2.6				0	0	FALSE	FALSE
Early	NSP12	NSP12_I494K	I	494	K	3	0.053	0.0627	-3	0.999001	15.0147	-8.4	0.999001	15.0147	8.4				0	0	FALSE	FALSE
Early	NSP12	NSP12_I494T	I	494	T	1	0.0369	0.0369	-1	-0.361905	-12.0537	-5.2	0.361905	12.0537	5.2				413	0	FALSE	FALSE
Early	NSP12	NSP12_I494V	I	494	V	1	0.1689	0.1689	3	-0.0261132	-14.0266	-0.3	0.0261132	14.0266	0.3				205	0	FALSE	FALSE
Early	NSP12	NSP12_I539T	I	539	T	1	0.0561	0.0561	-1	-0.361905	-12.0537	-5.2	0.361905	12.0537	5.2				116	1	FALSE	FALSE
Early	NSP12	NSP12_I548H	I	548	H	1	0.0302	0.0302	-3	0.0871742	23.9817	-7.7	0.0871742	23.9817	7.7				11	0	FALSE	FALSE
Early	NSP12	NSP12_I589D	I	589	D	2	0.0845	0.0845	-3	-0.995698	1.9298	-8	0.995698	1.9298	8				0	0	FALSE	FALSE
Early	NSP12	NSP12_I589F	I	589	F	2	0.0327	0.0327	0	0	34.0162	-1.7	0	34.0162	1.7				0	0	FALSE	FALSE
Early	NSP12	NSP12_I837T	I	837	T	1	0.0418	0.0418	-1	-0.361905	-12.0537	-5.2	0.361905	12.0537	5.2				60	0	FALSE	FALSE
Early	NSP12	NSP12_I888K	I	888	K	3	0.0586	0.0597	-3	0.999001	15.0147	-8.4	0.999001	15.0147	8.4				2	0	FALSE	FALSE
Early	NSP12	NSP12_I888T	I	888	T	1	0.0606	0.0606	-1	-0.361905	-12.0537	-5.2	0.361905	12.0537	5.2				7	0	FALSE	FALSE
Early	NSP12	NSP12_K160Q	K	160	Q	1	0.0364	0.0364	1	-0.999001	-0.0431	0.4	0.999001	0.0431	0.4				20	0	FALSE	FALSE
Early	NSP12	NSP12_K160R	K	160	R	1	0.0561	0.0561	2	0.000989001	28.0134	-0.6	0.000989001	28.0134	0.6				227	0	FALSE	FALSE
Early	NSP12	NSP12_K263N	K	263	N	3	0.0412	0.2382	0	-0.999001	-14.0697	0.4	0.999001	14.0697	0.4				436	3	FALSE	FALSE
Early	NSP12	NSP12_K263R	K	263	R	1	0.032	0.032	2	0.000989001	28.0134	-0.6	0.000989001	28.0134	0.6				455	6	FALSE	FALSE
Early	NSP12	NSP12_K272R	K	272	R	6	0.0389	0.0609	2	0.000989001	28.0134	-0.6	0.000989001	28.0134	0.6				40	0	FALSE	FALSE
Early	NSP12	NSP12_K272T	K	272	T	3	0.0399	0.0421	-1	-1.36091	-27.0684	3.2	1.36091	27.0684	3.2				6	0	FALSE	FALSE
Early	NSP12	NSP12_K281R	K	281	R	1	0.2107	0.2107	2	0.000989001	28.0134	-0.6	0.000989001	28.0134	0.6				40	0	FALSE	FALSE
Early	NSP12	NSP12_K288N	K	288	N	1	0.0561	0.0561	0	-0.999001	-14.0697	0.4	0.999001	14.0697	0.4				48	0	FALSE	FALSE
Early	NSP12	NSP12_K369N	K	369	N	1	0.9662	0.9662	0	-0.999001	-14.0697	0.4	0.999001	14.0697	0.4				251	1	FALSE	FALSE
Early	NSP12	NSP12_K391E	K	391	E	1	0.0549	0.0549	1	-1.91704	0.9417	0.4	1.91704	0.9417	0.4				76	0	FALSE	FALSE
Early	NSP12	NSP12_K508E	K	508	E	1	0.1382	0.1382	1	-1.91704	0.9417	0.4	1.91704	0.9417	0.4				1	0	FALSE	FALSE
Early	NSP12	NSP12_K50E	K	50	E	1	0.0407	0.0407	1	-1.91704	0.9417	0.4	1.91704	0.9417	0.4				2	0	FALSE	FALSE
Early	NSP12	NSP12_K511Q	K	511	Q	1	0.0341	0.0341	1	-0.999001	-0.0431	0.4	0.999001	0.0431	0.4				2	0	FALSE	FALSE
Early	NSP12	NSP12_K532N	K	532	N	1	0.0574	0.0574	0	-0.999001	-14.0697	0.4	0.999001	14.0697	0.4				2	0	FALSE	FALSE
Early	NSP12	NSP12_K551M	K	551	M	1	0.0891	0.0891	-1	-1.25875	3.0237	5.8	1.25875	3.0237	5.8				0	0	FALSE	FALSE
Early	NSP12	NSP12_K551N	K	551	N	2	0.15145	0.266	0	-0.999001	-14.0697	0.4	0.999001	14.0697	0.4				8	0	FALSE	FALSE
Early	NSP12	NSP12_K593R	K	593	R	1	0.0588	0.0588	2	0.000989001	28.0134	-0.6	0.000989001	28.0134	0.6				16	0	FALSE	FALSE
Early	NSP12	NSP12_K603A	K	603	A	1	0.055	0.055	-1	-0.963228	-57.0944	5.7	0.963228	57.0944	5.7				0	0	FALSE	FALSE
Early	NSP12	NSP12_K603D	K	603	D	1	0.0376	0.0376	-1	-1.9947	-13.0849	0.4	1.9947	13.0849	0.4				0	0	FALSE	FALSE
Early	NSP12	NSP12_K603G	K	603	G	1	0.0575	0.0575	-2	-0.999001	-71.121	3.5	0.999001	71.121	3.5				0	1	FALSE	FALSE
Early	NSP12	NSP12_K603H	K	603	H	1	0.0502	0.0502	-1	-0.911827	8.967	0.7	0.911827	8.967	0.7				1	0	FALSE	FALSE
Early	NSP12	NSP12_K603I	K	603	I	1	0.0576	0.0576	-3	-0.999001	-15.0147	8.4	0.999001	15.0147	8.4				1	0	FALSE	FALSE
Early	NSP12	NSP12_K603L	K	603	L	1	0.0475	0.0475	-2	-0.999001	-15.0147	7.7	0.999001	15.0147	7.7				3	0	FALSE	FALSE
Early	NSP12	NSP12_K603N	K	603	N	1	0.0401	0.0401	0	-0.999001	-14.0697	0.4	0.999001	14.0697	0.4				60	1	FALSE	FALSE
Early	NSP12	NSP12_K603P	K	603	P	1	0.0701	0.0701	-1	-0.800574	-31.0571	2.3	0.800574	31.0571	2.3				0	0	FALSE	FALSE
Early	NSP12	NSP12_K603Q	K	603	Q	1	0.0476	0.0476	1	-0.999001	-0.0431	0.4	0.999001	0.0431	0.4				53	0	FALSE	FALSE
Early	NSP12	NSP12_K603R	K	603	R	1	0.0701	0.0701	2	0.000989001	28.0134	-0.6	0.000989001	28.0134	0.6				250	0	FALSE	FALSE
Early	NSP12	NSP12_K603S	K	603	S	1	0.0626	0.0626	0	-1.29896	-41.095	3.1	1.29896	41.095	3.1				5	0	FALSE	FALSE
Early	NSP12	NSP12_K603T	K	603	T	1	0.0626	0.0626	-1	-1.36091	-27.0684	3.2	1.36091	27.0684	3.2				4	0	FALSE	FALSE
Early	NSP12	NSP12_K603Y	K	603	Y	1	0.03	0.03	-2	-1	35.0009	2.6	1	35.0009	2.6				0	0	FALSE	FALSE
Early	NSP12	NSP12_K718N	K	718	N	2	0.04275	0.0506	0	-0.999001	-14.0697	0.4	0.999001	14.0697	0.4				2006	1	FALSE	FALSE
Early	NSP12	NSP12_K73N	K	73	N	1	0.1334	0.1334	0	-0.999001	-14.0697	0.4	0.999001	14.0697	0.4				5	1	FALSE	FALSE
Early	NSP12	NSP12_K73Q	K	73	Q	1	0.0301	0.0301	1	-0.999001	-0.0431	0.4	0.999001	0.0431	0.4				1	0	FALSE	FALSE
Early	NSP12	NSP12_K780N	K	780	N	1	0.1312	0.1312	0	-0.999001	-14.0697	0.4	0.999001	14.0697	0.4				108	7	FALSE	FALSE
Early	NSP12	NSP12_K780R	K	780	R	1	0.1316	0.1316	2	0.000989001	28.0134	-0.6	0.000989001	28.0134	0.6				2093	4	FALSE	FALSE
Early	NSP12	NSP12_K783N	K	783	N	1	0.0787	0.0787	0	-0.999001	-14.0697	0.4	0.999001	14.0697	0.4				92	0	FALSE	FALSE
Early	NSP12	NSP12_K798E	K	798	E	1	0.0466	0.0466	1	-1.91704	0.9417	0.4	1.91704	0.9417	0.4				0	0	FALSE	FALSE
Early	NSP12	NSP12_K807N	K	807	N	1	0.0414	0.0414	0	-0.999001	-14.0697	0.4	0.999001	14.0697	0.4				176	0	FALSE	FALSE
Early	NSP12	NSP12_L142A	L	142	A	1	0.0323	0.0323	-1	0.035773	-42.0797	-2	0.035773	42.0797	2				0	0	FALSE	FALSE
Early	NSP12	NSP12_L142F	L	142	F	1	0.0914	0.0914	0	0	34.0162	-1	0	34.0162	1				14	0	FALSE	FALSE
Early	NSP12	NSP12_L142P	L	142	P	1	0.0672	0.0672	-3	0.198427	-16.0424	-5.4	0.198427	16.0424	5.4				0	0	FALSE	FALSE
Early	NSP12	NSP12_L142S	L	142	S	1	0.1424	0.1424	-2	-0.299955	-26.0803	-4.6	0.299955	26.0803	4.6				3	0	FALSE	FALSE
Early	NSP12	NSP12_L142V	L	142	V	1	0.0403	0.0403	1	-0.0261132	-14.0266	0.4	0.0261132	14.0266	0.4				25	0	FALSE	FALSE
Early	NSP12	NSP12_L142Y	L	142	Y	1	0.0323	0.0323	-1	-0.000999001	50.0156	-5.1	0.000999001	50.0156	5.1				0	0	FALSE	FALSE
Early	NSP12	NSP12_L172S	L	172	S	1	0.0308	0.0308	-2	-0.299955	-26.0803	-4.6	0.299955	26.0803	4.6				54	1	FALSE	FALSE
Early	NSP12	NSP12_L178V	L	178	V	1	0.0653	0.0653	1	-0.0261132	-14.0266	0.4	0.0261132	14.0266	0.4				174	0	FALSE	FALSE
Early	NSP12	NSP12_L19R	L	19	R	2	0.0609	0.0609	-2	0.99999	43.0281	-8.3	0.99999	43.0281	8.3				0	0	FALSE	FALSE
Early	NSP12	NSP12_L247S	L	247	S	2	0.03255	0.033	-2	-0.299955	-26.0803	-4.6	0.299955	26.0803	4.6				109	0	FALSE	FALSE
Early	NSP12	NSP12_L251I	L	251	I	8	0.03765	0.0852	2	0	0	0.7	0	0	0.7				29	0	FALSE	FALSE
Early	NSP12	NSP12_L251V	L	251	V	1	0.0331	0.0331	1	-0.0261132	-14.0266	0.4	0.0261132	14.0266	0.4				2	0	FALSE	FALSE
Early	NSP12	NSP12_L251Y	L	251	Y	1	0.039	0.039	-1	-0.000999001	50.0156	-5.1	0.000999001	50.0156	5.1				0	0	FALSE	FALSE
Early	NSP12	NSP12_L261C	L	261	C	16	0.0523	0.1216	-1	-0.00990099	-10.0147	-1.3	0.00990099	10.0147	1.3				327	2	FALSE	FALSE
Early	NSP12	NSP12_L270I	L	270	I	2	0.04345	0.0545	2	0	0	0.7	0	0	0.7				2	0	FALSE	FALSE
Early	NSP12	NSP12_L271S	L	271	S	3	0.0403	0.0423	-2	-0.299955	-26.0803	-4.6	0.299955	26.0803	4.6				144	0	FALSE	FALSE
Early	NSP12	NSP12_L308M	L	308	M	1	0.0454	0.0454	2	-0.259747	18.0384	-1.9	0.259747	18.0384	1.9				87	0	FALSE	FALSE
Early	NSP12	NSP12_L329V	L	329	V	3	0.0412	0.0541	1	-0.0261132	-14.0266	0.4	0.0261132	14.0266	0.4				13	0	FALSE	FALSE
Early	NSP12	NSP12_L361G	L	361	G	1	0.0556	0.0556	-4	0	-56.1063	-4.2	0	56.1063	4.2				0	0	FALSE	FALSE
Early	NSP12	NSP12_L371F	L	371	F	1	0.0348	0.0348	0	0	34.0162	-1	0	34.0162	1				6	0	FALSE	FALSE
Early	NSP12	NSP12_L372F	L	372	F	1	0.0361	0.0361	0	0	34.0162	-1	0	34.0162	1				55	4	FALSE	FALSE
Early	NSP12	NSP12_L460I	L	460	I	1	0.0352	0.0352	2	0	0	0.7	0	0	0.7				30	0	FALSE	FALSE
Early	NSP12	NSP12_L470H	L	470	H	1	0.0341	0.0341	-3	0.0871742	23.9817	-7	0.0871742	23.9817	7				0	0	FALSE	FALSE
Early	NSP12	NSP12_L470Q	L	470	Q	1	0.0545	0.0545	-2	0	14.9716	-7.3	0	14.9716	7.3				10	0	FALSE	FALSE
Early	NSP12	NSP12_L498V	L	498	V	1	0.0495	0.0495	1	-0.0261132	-14.0266	0.4	0.0261132	14.0266	0.4				2	0	FALSE	FALSE
Early	NSP12	NSP12_L514P	L	514	P	1	0.166	0.166	-3	0.198427	-16.0424	-5.4	0.198427	16.0424	5.4				2	0	FALSE	FALSE
Early	NSP12	NSP12_L527F	L	527	F	2	0.12795	0.155	0	0	34.0162	-1	0	34.0162	1				426	1	FALSE	FALSE
Early	NSP12	NSP12_L527P	L	527	P	1	0.0693	0.0693	-3	0.198427	-16.0424	-5.4	0.198427	16.0424	5.4				7	1	FALSE	FALSE
Early	NSP12	NSP12_L544H	L	544	H	16	0.0757	0.1467	-3	0.0871742	23.9817	-7	0.0871742	23.9817	7				11	0	FALSE	FALSE
Early	NSP12	NSP12_L544I	L	544	I	1	0.0529	0.0529	2	0	0	0.7	0	0	0.7				75	0	FALSE	FALSE
Early	NSP12	NSP12_L602F	L	602	F	2	0.2438	0.441	0	0	34.0162	-1	0	34.0162	1				10	0	FALSE	FALSE
Early	NSP12	NSP12_L614D	L	614	D	2	0.0604	0.0604	-4	-0.995698	1.9298	-7.3	0.995698	1.9298	7.3				0	0	FALSE	FALSE
Early	NSP12	NSP12_L614T	L	614	T	3	0.0351	0.0418	-1	-0.361905	-12.0537	-4.5	0.361905	12.0537	4.5				0	0	FALSE	FALSE
Early	NSP12	NSP12_L648F	L	648	F	1	0.0562	0.0562	0	0	34.0162	-1	0	34.0162	1				409	2	FALSE	FALSE
Early	NSP12	NSP12_L65F	L	65	F	1	0.0479	0.0479	0	0	34.0162	-1	0	34.0162	1				10	0	FALSE	FALSE
Early	NSP12	NSP12_L663T	L	663	T	2	0.03865	0.0422	-1	-0.361905	-12.0537	-4.5	0.361905	12.0537	4.5				0	0	FALSE	FALSE
Early	NSP12	NSP12_L707F	L	707	F	5	0.0583	0.0965	0	0	34.0162	-1	0	34.0162	1				101	2	FALSE	FALSE
Early	NSP12	NSP12_L707I	L	707	I	1	0.0423	0.0423	2	0	0	0.7	0	0	0.7				96	0	FALSE	FALSE
Early	NSP12	NSP12_L723I	L	723	I	2	0.04125	0.0413	2	0	0	0.7	0	0	0.7				29	0	FALSE	FALSE
Early	NSP12	NSP12_L727F	L	727	F	1	0.0519	0.0519	0	0	34.0162	-1	0	34.0162	1				14	0	FALSE	FALSE
Early	NSP12	NSP12_L731F	L	731	F	1	0.0734	0.0734	0	0	34.0162	-1	0	34.0162	1				66	0	FALSE	FALSE
Early	NSP12	NSP12_L749M	L	749	M	1	0.0302	0.0302	2	-0.259747	18.0384	-1.9	0.259747	18.0384	1.9				271	0	FALSE	FALSE
Early	NSP12	NSP12_L775I	L	775	I	3	0.0399	0.0411	2	0	0	0.7	0	0	0.7				88	0	FALSE	FALSE
Early	NSP12	NSP12_L786F	L	786	F	2	0.0961	0.0982	0	0	34.0162	-1	0	34.0162	1				44	0	FALSE	FALSE
Early	NSP12	NSP12_L786I	L	786	I	3	0.0514	0.0542	2	0	0	0.7	0	0	0.7				59	0	FALSE	FALSE
Early	NSP12	NSP12_L805P	L	805	P	2	0.0364	0.0364	-3	0.198427	-16.0424	-5.4	0.198427	16.0424	5.4				56	0	FALSE	FALSE
Early	NSP12	NSP12_L819I	L	819	I	1	0.0337	0.0337	2	0	0	0.7	0	0	0.7				586	0	FALSE	FALSE
Early	NSP12	NSP12_L829P	L	829	P	1	0.0357	0.0357	-3	0.198427	-16.0424	-5.4	0.198427	16.0424	5.4				5	0	FALSE	FALSE
Early	NSP12	NSP12_L838I	L	838	I	4	0.15025	0.2296	2	0	0	0.7	0	0	0.7				81770	0	FALSE	FALSE
Early	NSP12	NSP12_L854F	L	854	F	2	0.15025	0.2486	0	0	34.0162	-1	0	34.0162	1				5	0	FALSE	FALSE
Early	NSP12	NSP12_L883M	L	883	M	2	0.04125	0.0423	2	-0.259747	18.0384	-1.9	0.259747	18.0384	1.9				2	0	FALSE	FALSE
Early	NSP12	NSP12_L885C	L	885	C	2	0.03725	0.043	-1	-0.00990099	-10.0147	-1.3	0.00990099	10.0147	1.3				0	0	FALSE	FALSE
Early	NSP12	NSP12_L885S	L	885	S	1	0.0333	0.0333	-2	-0.299955	-26.0803	-4.6	0.299955	26.0803	4.6				5	0	FALSE	FALSE
Early	NSP12	NSP12_L891T	L	891	T	1	0.059	0.059	-1	-0.361905	-12.0537	-4.5	0.361905	12.0537	4.5				1	0	FALSE	FALSE
Early	NSP12	NSP12_L900I	L	900	I	1	0.0783	0.0783	2	0	0	0.7	0	0	0.7				1	0	FALSE	FALSE
Early	NSP12	NSP12_L900P	L	900	P	1	0.0369	0.0369	-3	0.198427	-16.0424	-5.4	0.198427	16.0424	5.4				0	0	FALSE	FALSE
Early	NSP12	NSP12_L900R	L	900	R	1	0.0322	0.0322	-2	0.99999	43.0281	-8.3	0.99999	43.0281	8.3				19	0	FALSE	FALSE
Early	NSP12	NSP12_L900S	L	900	S	3	0.0323	0.1152	-2	-0.299955	-26.0803	-4.6	0.299955	26.0803	4.6				8	0	FALSE	FALSE
Early	NSP12	NSP12_L900V	L	900	V	1	0.0323	0.0323	1	-0.0261132	-14.0266	0.4	0.0261132	14.0266	0.4				2	0	FALSE	FALSE
Early	NSP12	NSP12_M124L	M	124	L	1	0.038	0.038	2	0.259747	-18.0384	1.9	0.259747	18.0384	1.9				50	3	FALSE	FALSE
Early	NSP12	NSP12_M196G	M	196	G	1	0.0579	0.0579	-3	0.259747	-74.1447	-2.3	0.259747	74.1447	2.3				0	0	FALSE	FALSE
Early	NSP12	NSP12_M380T	M	380	T	1	0.0609	0.0609	-1	-0.102158	-30.0921	-2.6	0.102158	30.0921	2.6				9	0	FALSE	FALSE
Early	NSP12	NSP12_M601I	M	601	I	1	0.038	0.038	1	0.259747	-18.0384	2.6	0.259747	18.0384	2.6				5997	38	FALSE	FALSE
Early	NSP12	NSP12_M615K	M	615	K	1	0.0329	0.0329	-1	1.25875	-3.0237	-5.8	1.25875	3.0237	5.8				5	0	FALSE	FALSE
Early	NSP12	NSP12_M615L	M	615	L	1	0.0333	0.0333	2	0.259747	-18.0384	1.9	0.259747	18.0384	1.9				15	0	FALSE	FALSE
Early	NSP12	NSP12_M615R	M	615	R	1	0.1306	0.1306	-1	1.25974	24.9897	-6.4	1.25974	24.9897	6.4				8	0	FALSE	FALSE
Early	NSP12	NSP12_M633L	M	633	L	2	0.04465	0.0482	2	0.259747	-18.0384	1.9	0.259747	18.0384	1.9				41	0	FALSE	FALSE
Early	NSP12	NSP12_M668I	M	668	I	3	0.052	0.0521	1	0.259747	-18.0384	2.6	0.259747	18.0384	2.6				1550	25	FALSE	FALSE
Early	NSP12	NSP12_M756R	M	756	R	1	0.0514	0.0514	-1	1.25974	24.9897	-6.4	1.25974	24.9897	6.4				1	0	FALSE	FALSE
Early	NSP12	NSP12_M818I	M	818	I	2	0.0528	0.0565	1	0.259747	-18.0384	2.6	0.259747	18.0384	2.6				1037	6	FALSE	FALSE
Early	NSP12	NSP12_M899I	M	899	I	1	0.1365	0.1365	1	0.259747	-18.0384	2.6	0.259747	18.0384	2.6				730	1	FALSE	FALSE
Early	NSP12	NSP12_M899K	M	899	K	1	0.1122	0.1122	-1	1.25875	-3.0237	-5.8	1.25875	3.0237	5.8				1	0	FALSE	FALSE
Early	NSP12	NSP12_M899N	M	899	N	1	0.0373	0.0373	-2	0.259747	-17.0934	-5.4	0.259747	17.0934	5.4				0	0	FALSE	FALSE
Early	NSP12	NSP12_M899R	M	899	R	1	0.0686	0.0686	-1	1.25974	24.9897	-6.4	1.25974	24.9897	6.4				1	0	FALSE	FALSE
Early	NSP12	NSP12_M899S	M	899	S	1	0.0518	0.0518	-1	-0.0402082	-44.1187	-2.7	0.0402082	44.1187	2.7				0	0	FALSE	FALSE
Early	NSP12	NSP12_M899T	M	899	T	1	0.1769	0.1769	-1	-0.102158	-30.0921	-2.6	0.102158	30.0921	2.6				1	0	FALSE	FALSE
Early	NSP12	NSP12_M924I	M	924	I	1	0.0361	0.0361	1	0.259747	-18.0384	2.6	0.259747	18.0384	2.6				23	0	FALSE	FALSE
Early	NSP12	NSP12_N138H	N	138	H	2	0.0404	0.041	1	0.0871742	23.0367	0.3	0.0871742	23.0367	0.3				12	0	FALSE	FALSE
[truncated: 5,507 more rows]

## Sheet: Supplementary Table 1b
						Intrahost predictors			Physiochemical predictors							DMS predictors							Linkage predictors
Timeframe	Protein name	Mutation name	Reference AA	Codon position	Variant AA	No. libraries	Median intrahost freq.	Maximum intrahost freq.	BLOSUM62 score	Change in charge	Change in MW	Change in hydropathy	Absolute charge change	Absolute MW change	Absolute hydropathy change	Change in RBD binding	Change in RBD expression	Mean antibody escape	Future fitness	Prior fitness	Future freq. >10%	Future freq. >90%	Max. r (intrahost)	No. linked SAVs (intrahost)	Is linked (intrahost)	Max. D' (consensus)	No. linked SAVs (consensus)	Is linked (consensus)
Alpha	E	E_A32V	A	32	V	1	0.5098	0.5098	0	-0.0618862	28.0531	2.4	0.0618862	28.0531	2.4				183	4	FALSE	FALSE	-1	-1	-1	-1	-1	-1
Alpha	E	E_A36V	A	36	V	1	0.044	0.044	0	-0.0618862	28.0531	2.4	0.0618862	28.0531	2.4				322	20	FALSE	FALSE	-1	-1	-1	-1	-1	-1
Alpha	E	E_A41V	A	41	V	1	0.9965	0.9965	0	-0.0618862	28.0531	2.4	0.0618862	28.0531	2.4				959	57	FALSE	FALSE	-1	-1	-1	-1	-1	-1
Alpha	E	E_C43F	C	43	F	1	0.0658	0.0658	-2	0.00990099	44.0309	0.3	0.00990099	44.0309	0.3				555	86	FALSE	FALSE	-1	-1	-1	-1	-1	-1
Alpha	E	E_D72G	D	72	G	2	0.69485	0.9627	-1	0.995698	-58.0361	3.1	0.995698	58.0361	3.1				17365	283	FALSE	FALSE	-1	-1	-1	-1	-1	-1
Alpha	E	E_D72S	D	72	S	1	0.0803	0.0803	0	0.695743	-28.0101	2.7	0.695743	28.0101	2.7				2	0	FALSE	FALSE	-1	-1	-1	-1	-1	-1
Alpha	E	E_D72V	D	72	V	15	0.0383	0.146	-3	0.969585	-15.9564	7.7	0.969585	15.9564	7.7				57	1	FALSE	FALSE	0.96307	1	1	-1	-1	-1
Alpha	E	E_D72Y	D	72	Y	1	0.1381	0.1381	-3	0.994699	48.0858	2.2	0.994699	48.0858	2.2				383	151	FALSE	FALSE	-1	-1	-1	-1	-1	-1
Alpha	E	E_F26L	F	26	L	1	0.0564	0.0564	0	0	-34.0162	1	0	34.0162	1				853	66	FALSE	FALSE	-1	-1	-1	-1	-1	-1
Alpha	E	E_F26S	F	26	S	1	0.0443	0.0443	-2	-0.299955	-60.0965	-3.6	0.299955	60.0965	3.6				49	11	FALSE	FALSE	-1	-1	-1	-1	-1	-1
Alpha	E	E_F26V	F	26	V	2	0.06015	0.0664	-1	-0.0261132	-48.0428	1.4	0.0261132	48.0428	1.4				10	0	FALSE	FALSE	-1	-1	-1	-1	-1	-1
Alpha	E	E_F4L	F	4	L	1	1	1	0	0	-34.0162	1	0	34.0162	1				234	19	FALSE	FALSE	-1	-1	-1	-1	-1	-1
Alpha	E	E_F4S	F	4	S	1	0.0679	0.0679	-2	-0.299955	-60.0965	-3.6	0.299955	60.0965	3.6				2	2	FALSE	FALSE	-1	-1	-1	-1	-1	-1
Alpha	E	E_G10E	G	10	E	7	0.0539	0.0846	-2	-0.918037	72.0627	-3.1	0.918037	72.0627	3.1				0	0	FALSE	FALSE	0.971689	1	1	-1	-1	-1
Alpha	E	E_I33T	I	33	T	1	0.0558	0.0558	-1	-0.361905	-12.0537	-5.2	0.361905	12.0537	5.2				233	35	FALSE	FALSE	-1	-1	-1	-1	-1	-1
Alpha	E	E_K63N	K	63	N	1	0.0538	0.0538	0	-0.999001	-14.0697	0.4	0.999001	14.0697	0.4				15	4	FALSE	FALSE	-1	-1	-1	-1	-1	-1
Alpha	E	E_L19P	L	19	P	1	0.0408	0.0408	-3	0.198427	-16.0424	-5.4	0.198427	16.0424	5.4				10	7	FALSE	FALSE	-1	-1	-1	-1	-1	-1
Alpha	E	E_L21F	L	21	F	4	0.93415	0.9558	0	0	34.0162	-1	0	34.0162	1				4454	595	FALSE	FALSE	-1	-1	-1	-1	-1	-1
Alpha	E	E_L21V	L	21	V	8	0.53355	0.9963	1	-0.0261132	-14.0266	0.4	0.0261132	14.0266	0.4				139	266	FALSE	FALSE	0.616875	0	0	-1	-1	-1
Alpha	E	E_L37I	L	37	I	1	0.0432	0.0432	2	0	0	0.7	0	0	0.7				2	3	FALSE	FALSE	-1	-1	-1	-1	-1	-1
Alpha	E	E_L73D	L	73	D	14	0.03815	0.1307	-4	-0.995698	1.9298	-7.3	0.995698	1.9298	7.3				0	0	FALSE	FALSE	0.96307	1	1	-1	-1	-1
Alpha	E	E_L73F	L	73	F	1	1	1	0	0	34.0162	-1	0	34.0162	1				3073	742	FALSE	FALSE	-1	-1	-1	-1	-1	-1
Alpha	E	E_M1I	M	1	I	1	0.1023	0.1023	1	0.259747	-18.0384	2.6	0.259747	18.0384	2.6				0	2	FALSE	FALSE	-1	-1	-1	-1	-1	-1
Alpha	E	E_M1S	M	1	S	2	0.03755	0.0405	-1	-0.0402082	-44.1187	-2.7	0.0402082	44.1187	2.7				0	0	FALSE	FALSE	-1	-1	-1	-1	-1	-1
Alpha	E	E_N15I	N	15	I	1	0.0345	0.0345	-3	0	-0.945	8	0	0.945	8				4	2	FALSE	FALSE	-1	-1	-1	-1	-1	-1
Alpha	E	E_N64S	N	64	S	1	0.061	0.061	1	-0.299955	-27.0253	2.7	0.299955	27.0253	2.7				256	13	FALSE	FALSE	-1	-1	-1	-1	-1	-1
Alpha	E	E_P71L	P	71	L	22	0.0381	0.9634	-3	-0.198427	16.0424	5.4	0.198427	16.0424	5.4				12495	2688	FALSE	FALSE	0.28432	0	0	0.968157	2	1
Alpha	E	E_P71R	P	71	R	1	0.0708	0.0708	-2	0.801563	59.0705	-2.9	0.801563	59.0705	2.9				208	9	FALSE	FALSE	-1	-1	-1	-1	-1	-1
Alpha	E	E_P71V	P	71	V	3	0.046	0.0708	-2	-0.22454	2.0158	5.8	0.22454	2.0158	5.8				16	10	FALSE	FALSE	-1	-1	-1	-1	-1	-1
Alpha	E	E_R38P	R	38	P	1	0.0484	0.0484	-2	-0.801563	-59.0705	2.9	0.801563	59.0705	2.9				6	0	FALSE	FALSE	-1	-1	-1	-1	-1	-1
Alpha	E	E_R61L	R	61	L	1	0.0647	0.0647	-2	-0.99999	-43.0281	8.3	0.99999	43.0281	8.3				2669	89	FALSE	FALSE	-1	-1	-1	-1	-1	-1
Alpha	E	E_R69K	R	69	K	8	0.0332	0.0559	2	-0.000989001	-28.0134	0.6	0.000989001	28.0134	0.6				64	36	FALSE	FALSE	0.627195	0	0	-1	-1	-1
Alpha	E	E_R69N	R	69	N	2	0.0357	0.04	0	-0.99999	-42.0831	1	0.99999	42.0831	1				0	0	FALSE	FALSE	-1	-1	-1	-1	-1	-1
Alpha	E	E_R69Q	R	69	Q	1	0.031	0.031	1	-0.99999	-28.0565	1	0.99999	28.0565	1				0	0	FALSE	FALSE	-1	-1	-1	-1	-1	-1
Alpha	E	E_R69T	R	69	T	7	0.0365	0.0467	-1	-1.3619	-55.0818	3.8	1.3619	55.0818	3.8				34	2	FALSE	FALSE	0.661978	0	0	-1	-1	-1
Alpha	E	E_S16G	S	16	G	2	0.0403	0.0403	0	0.299955	-30.026	0.4	0.299955	30.026	0.4				126	10	FALSE	FALSE	-1	-1	-1	-1	-1	-1
Alpha	E	E_S16N	S	16	N	2	0.03935	0.0395	1	0.299955	27.0253	-2.7	0.299955	27.0253	2.7				264	26	FALSE	FALSE	-1	-1	-1	-1	-1	-1
Alpha	E	E_S16T	S	16	T	1	0.0327	0.0327	1	-0.0619499	14.0266	0.1	0.0619499	14.0266	0.1				14	0	FALSE	FALSE	-1	-1	-1	-1	-1	-1
Alpha	E	E_S55F	S	55	F	2	0.9104	0.9712	-2	0.299955	60.0965	3.6	0.299955	60.0965	3.6				7539	309	FALSE	FALSE	-1	-1	-1	-1	-1	-1
Alpha	E	E_S67P	S	67	P	5	0.035	0.0721	-1	0.498382	10.0379	-0.8	0.498382	10.0379	0.8				120	36	FALSE	FALSE	-1	-1	-1	-1	-1	-1
Alpha	E	E_S68F	S	68	F	3	0.9815	1	-2	0.299955	60.0965	3.6	0.299955	60.0965	3.6				4413	1337	FALSE	FALSE	-1	-1	-1	0.243663	0	0
Alpha	E	E_S68T	S	68	T	2	0.03435	0.0345	1	-0.0619499	14.0266	0.1	0.0619499	14.0266	0.1				14	1	FALSE	FALSE	-1	-1	-1	-1	-1	-1
Alpha	E	E_S6C	S	6	C	1	0.0333	0.0333	-1	0.290054	16.0656	3.3	0.290054	16.0656	3.3				0	0	FALSE	FALSE	-1	-1	-1	-1	-1	-1
Alpha	E	E_S6L	S	6	L	2	0.1233	0.1253	-2	0.299955	26.0803	4.6	0.299955	26.0803	4.6				33	16	FALSE	FALSE	-1	-1	-1	-1	-1	-1
Alpha	E	E_T30I	T	30	I	3	0.1003	0.5288	-1	0.361905	12.0537	5.2	0.361905	12.0537	5.2				583	175	FALSE	FALSE	-1	-1	-1	-1	-1	-1
Alpha	E	E_T35I	T	35	I	1	0.0388	0.0388	-1	0.361905	12.0537	5.2	0.361905	12.0537	5.2				14	1	FALSE	FALSE	-1	-1	-1	-1	-1	-1
Alpha	E	E_T9I	T	9	I	2	0.288	0.4747	-1	0.361905	12.0537	5.2	0.361905	12.0537	5.2				3938645	1055	TRUE	TRUE	-1	-1	-1	0.876932	0	0
Alpha	E	E_T9K	T	9	K	8	0.0587	0.0956	-1	1.36091	27.0684	-3.2	1.36091	27.0684	3.2				2	1	FALSE	FALSE	0.971689	1	1	-1	-1	-1
Alpha	E	E_V14F	V	14	F	1	0.0689	0.0689	-1	0.0261132	48.0428	-1.4	0.0261132	48.0428	1.4				39	2	FALSE	FALSE	-1	-1	-1	-1	-1	-1
Alpha	E	E_V14P	V	14	P	2	0.0376	0.0407	-2	0.22454	-2.0158	-5.8	0.22454	2.0158	5.8				0	0	FALSE	FALSE	-1	-1	-1	-1	-1	-1
Alpha	E	E_V14T	V	14	T	1	0.0335	0.0335	0	-0.335792	1.9729	-4.9	0.335792	1.9729	4.9				0	0	FALSE	FALSE	-1	-1	-1	-1	-1	-1
Alpha	E	E_V17T	V	17	T	1	0.0379	0.0379	0	-0.335792	1.9729	-4.9	0.335792	1.9729	4.9				1	0	FALSE	FALSE	-1	-1	-1	-1	-1	-1
Alpha	E	E_V24L	V	24	L	1	0.8684	0.8684	1	0.0261132	14.0266	-0.4	0.0261132	14.0266	0.4				2682	37	FALSE	FALSE	-1	-1	-1	-1	-1	-1
Alpha	E	E_V49L	V	49	L	1	0.0416	0.0416	1	0.0261132	14.0266	-0.4	0.0261132	14.0266	0.4				1424	322	FALSE	FALSE	-1	-1	-1	-1	-1	-1
Alpha	E	E_V58F	V	58	F	1	0.9755	0.9755	-1	0.0261132	48.0428	-1.4	0.0261132	48.0428	1.4				3831	314	FALSE	FALSE	-1	-1	-1	-1	-1	-1
Alpha	E	E_V5A	V	5	A	2	0.05	0.0549	0	0.0618862	-28.0531	-2.4	0.0618862	28.0531	2.4				36	21	FALSE	FALSE	-1	-1	-1	-1	-1	-1
Alpha	E	E_V5F	V	5	F	1	0.0387	0.0387	-1	0.0261132	48.0428	-1.4	0.0261132	48.0428	1.4				190	55	FALSE	FALSE	-1	-1	-1	-1	-1	-1
Alpha	E	E_V70F	V	70	F	1	0.0385	0.0385	-1	0.0261132	48.0428	-1.4	0.0261132	48.0428	1.4				260	35	FALSE	FALSE	-1	-1	-1	-1	-1	-1
Alpha	E	E_V70L	V	70	L	27	0.0733	0.1359	1	0.0261132	14.0266	-0.4	0.0261132	14.0266	0.4				22	2	FALSE	FALSE	0.709427	0	0	-1	-1	-1
Alpha	E	E_V70S	V	70	S	18	0.03535	0.0811	-2	-0.273842	-12.0537	-5	0.273842	12.0537	5				6	0	FALSE	FALSE	0.504527	0	0	-1	-1	-1
Alpha	E	E_Y42H	Y	42	H	1	0.0387	0.0387	2	0.0881732	-26.0339	-1.9	0.0881732	26.0339	1.9				35	1	FALSE	FALSE	-1	-1	-1	-1	-1	-1
Alpha	M	M_A142V	A	142	V	1	0.1228	0.1228	0	-0.0618862	28.0531	2.4	0.0618862	28.0531	2.4				679	158	FALSE	FALSE	-1	-1	-1	-1	-1	-1
Alpha	M	M_A152S	A	152	S	1	0.0306	0.0306	1	-0.335728	15.9994	-2.6	0.335728	15.9994	2.6				43	17	FALSE	FALSE	-1	-1	-1	-1	-1	-1
Alpha	M	M_A171C	A	171	C	60	0.0675	0.5287	0	-0.045674	32.065	0.7	0.045674	32.065	0.7				4	0	FALSE	FALSE	0.840537	0	0	-1	-1	-1
Alpha	M	M_A171P	A	171	P	1	0.0305	0.0305	-1	0.162654	26.0373	-3.4	0.162654	26.0373	3.4				1	0	FALSE	FALSE	-1	-1	-1	-1	-1	-1
Alpha	M	M_A171S	A	171	S	1	0.0358	0.0358	1	-0.335728	15.9994	-2.6	0.335728	15.9994	2.6				21	1	FALSE	FALSE	-1	-1	-1	-1	-1	-1
Alpha	M	M_A218V	A	218	V	1	0.0404	0.0404	0	-0.0618862	28.0531	2.4	0.0618862	28.0531	2.4				7	4	FALSE	FALSE	-1	-1	-1	-1	-1	-1
Alpha	M	M_A2S	A	2	S	2	0.50365	0.943	1	-0.335728	15.9994	-2.6	0.335728	15.9994	2.6				8860	1096	FALSE	FALSE	-1	-1	-1	0.842048	0	0
Alpha	M	M_A2V	A	2	V	2	0.82535	0.9093	0	-0.0618862	28.0531	2.4	0.0618862	28.0531	2.4				5001	1357	FALSE	FALSE	-1	-1	-1	0.537552	0	0
Alpha	M	M_A38S	A	38	S	1	0.9597	0.9597	1	-0.335728	15.9994	-2.6	0.335728	15.9994	2.6				631	82	FALSE	FALSE	-1	-1	-1	-1	-1	-1
Alpha	M	M_A63P	A	63	P	1	0.0411	0.0411	-1	0.162654	26.0373	-3.4	0.162654	26.0373	3.4				0	0	FALSE	FALSE	-1	-1	-1	-1	-1	-1
Alpha	M	M_A63S	A	63	S	1	1	1	1	-0.335728	15.9994	-2.6	0.335728	15.9994	2.6				446	40	FALSE	FALSE	-1	-1	-1	-1	-1	-1
Alpha	M	M_A63T	A	63	T	47	0.0355	0.0553	0	-0.397678	30.026	-2.5	0.397678	30.026	2.5				3939070	251	TRUE	TRUE	0.931052	1	1	-1	-1	-1
Alpha	M	M_A68S	A	68	S	8	0.06455	0.9966	1	-0.335728	15.9994	-2.6	0.335728	15.9994	2.6				534	46	FALSE	FALSE	0.20841	0	0	-1	-1	-1
Alpha	M	M_A68V	A	68	V	1	0.0464	0.0464	0	-0.0618862	28.0531	2.4	0.0618862	28.0531	2.4				14	3	FALSE	FALSE	-1	-1	-1	-1	-1	-1
Alpha	M	M_A69V	A	69	V	1	0.0674	0.0674	0	-0.0618862	28.0531	2.4	0.0618862	28.0531	2.4				1648	41	FALSE	FALSE	-1	-1	-1	-1	-1	-1
Alpha	M	M_A81S	A	81	S	1	1	1	1	-0.335728	15.9994	-2.6	0.335728	15.9994	2.6				8299	151	FALSE	FALSE	-1	-1	-1	-1	-1	-1
Alpha	M	M_A83V	A	83	V	1	0.0395	0.0395	0	-0.0618862	28.0531	2.4	0.0618862	28.0531	2.4				147	8	FALSE	FALSE	-1	-1	-1	-1	-1	-1
Alpha	M	M_A85P	A	85	P	1	0.0752	0.0752	-1	0.162654	26.0373	-3.4	0.162654	26.0373	3.4				1	0	FALSE	FALSE	-1	-1	-1	-1	-1	-1
Alpha	M	M_A85S	A	85	S	1	0.9987	0.9987	1	-0.335728	15.9994	-2.6	0.335728	15.9994	2.6				891	386	FALSE	FALSE	-1	-1	-1	-1	-1	-1
Alpha	M	M_A98S	A	98	S	2	0.86935	0.9992	1	-0.335728	15.9994	-2.6	0.335728	15.9994	2.6				1056	164	FALSE	FALSE	-1	-1	-1	-1	-1	-1
Alpha	M	M_C33F	C	33	F	1	0.9974	0.9974	-2	0.00990099	44.0309	0.3	0.00990099	44.0309	0.3				1241	189	FALSE	FALSE	-1	-1	-1	-1	-1	-1
Alpha	M	M_C64F	C	64	F	1	0.0967	0.0967	-2	0.00990099	44.0309	0.3	0.00990099	44.0309	0.3				495	89	FALSE	FALSE	-1	-1	-1	-1	-1	-1
Alpha	M	M_C64G	C	64	G	54	0.03705	0.0588	-3	0.00990099	-46.0916	-2.9	0.00990099	46.0916	2.9				18	0	FALSE	FALSE	0.931052	1	1	-1	-1	-1
Alpha	M	M_C86V	C	86	V	1	0.0469	0.0469	-1	-0.0162122	-4.0119	1.7	0.0162122	4.0119	1.7				3	1	FALSE	FALSE	-1	-1	-1	-1	-1	-1
Alpha	M	M_D209K	D	209	K	1	0.0312	0.0312	-1	1.9947	13.0849	-0.4	1.9947	13.0849	0.4				1	1	FALSE	FALSE	-1	-1	-1	-1	-1	-1
Alpha	M	M_D209N	D	209	N	1	0.0874	0.0874	1	0.995698	-0.9848	0	0.995698	0.9848	0				302	10	FALSE	FALSE	-1	-1	-1	-1	-1	-1
Alpha	M	M_D209V	D	209	V	1	0.0608	0.0608	-3	0.969585	-15.9564	7.7	0.969585	15.9564	7.7				10	1	FALSE	FALSE	-1	-1	-1	-1	-1	-1
Alpha	M	M_E115G	E	115	G	1	0.0472	0.0472	-2	0.918037	-72.0627	3.1	0.918037	72.0627	3.1				2	0	FALSE	FALSE	-1	-1	-1	-1	-1	-1
Alpha	M	M_E167P	E	167	P	95	0.0404	0.2155	-1	1.11646	-31.9988	1.9	1.11646	31.9988	1.9				0	0	FALSE	FALSE	0.908119	1	1	-1	-1	-1
Alpha	M	M_E167Q	E	167	Q	6	0.04215	0.0803	2	0.918037	-0.9848	0	0.918037	0.9848	0				439	42	FALSE	FALSE	0.664462	0	0	-1	-1	-1
Alpha	M	M_E18A	E	18	A	1	0.997	0.997	-1	0.95381	-58.0361	5.3	0.95381	58.0361	5.3				2	0	FALSE	FALSE	-1	-1	-1	-1	-1	-1
Alpha	M	M_F112L	F	112	L	4	0.03325	0.136	0	0	-34.0162	1	0	34.0162	1				60	3	FALSE	FALSE	-1	-1	-1	-1	-1	-1
Alpha	M	M_F112Y	F	112	Y	1	0.0696	0.0696	3	-0.000999001	15.9994	-4.1	0.000999001	15.9994	4.1				50	16	FALSE	FALSE	-1	-1	-1	-1	-1	-1
Alpha	M	M_F193S	F	193	S	1	0.2315	0.2315	-2	-0.299955	-60.0965	-3.6	0.299955	60.0965	3.6				3	0	FALSE	FALSE	-1	-1	-1	-1	-1	-1
Alpha	M	M_F28L	F	28	L	6	0.9981	0.9991	0	0	-34.0162	1	0	34.0162	1				6028	178	FALSE	FALSE	0.691175	0	0	-1	-1	-1
Alpha	M	M_F28S	F	28	S	1	0.0567	0.0567	-2	-0.299955	-60.0965	-3.6	0.299955	60.0965	3.6				24	5	FALSE	FALSE	-1	-1	-1	-1	-1	-1
Alpha	M	M_F28V	F	28	V	1	0.0415	0.0415	-1	-0.0261132	-48.0428	1.4	0.0261132	48.0428	1.4				2	0	FALSE	FALSE	-1	-1	-1	-1	-1	-1
Alpha	M	M_F45I	F	45	I	1	0.0311	0.0311	0	0	-34.0162	1.7	0	34.0162	1.7				1	0	FALSE	FALSE	-1	-1	-1	-1	-1	-1
Alpha	M	M_F45Q	F	45	Q	1	0.0314	0.0314	-3	0	-19.0446	-6.3	0	19.0446	6.3				0	0	FALSE	FALSE	-1	-1	-1	-1	-1	-1
Alpha	M	M_F45T	F	45	T	3	0.0439	0.0455	-2	-0.361905	-46.0699	-3.5	0.361905	46.0699	3.5				1	0	FALSE	FALSE	-1	-1	-1	-1	-1	-1
Alpha	M	M_F53L	F	53	L	1	0.9939	0.9939	0	0	-34.0162	1	0	34.0162	1				269	14	FALSE	FALSE	-1	-1	-1	-1	-1	-1
Alpha	M	M_F65C	F	65	C	3	0.0328	0.0396	-2	-0.00990099	-44.0309	-0.3	0.00990099	44.0309	0.3				8	9	FALSE	FALSE	-1	-1	-1	-1	-1	-1
Alpha	M	M_F65V	F	65	V	13	0.0465	0.0997	-1	-0.0261132	-48.0428	1.4	0.0261132	48.0428	1.4				3	1	FALSE	FALSE	0.504876	0	0	-1	-1	-1
Alpha	M	M_G25V	G	25	V	1	0.0552	0.0552	-3	-0.0261132	42.0797	4.6	0.0261132	42.0797	4.6				9	5	FALSE	FALSE	-1	-1	-1	-1	-1	-1
Alpha	M	M_G6C	G	6	C	1	0.9172	0.9172	-3	-0.00990099	46.0916	2.9	0.00990099	46.0916	2.9				286	44	FALSE	FALSE	-1	-1	-1	-1	-1	-1
Alpha	M	M_G6D	G	6	D	1	0.1312	0.1312	-1	-0.995698	58.0361	-3.1	0.995698	58.0361	3.1				326	29	FALSE	FALSE	-1	-1	-1	-1	-1	-1
Alpha	M	M_G6S	G	6	S	1	0.0496	0.0496	0	-0.299955	30.026	-0.4	0.299955	30.026	0.4				658	16	FALSE	FALSE	-1	-1	-1	-1	-1	-1
Alpha	M	M_G78C	G	78	C	2	0.5183	1	-3	-0.00990099	46.0916	2.9	0.00990099	46.0916	2.9				726	133	FALSE	FALSE	-1	-1	-1	-1	-1	-1
Alpha	M	M_G78S	G	78	S	1	0.0974	0.0974	0	-0.299955	30.026	-0.4	0.299955	30.026	0.4				581	41	FALSE	FALSE	-1	-1	-1	-1	-1	-1
Alpha	M	M_G89D	G	89	D	3	0.0635	0.0661	-1	-0.995698	58.0361	-3.1	0.995698	58.0361	3.1				52	8	FALSE	FALSE	-1	-1	-1	-1	-1	-1
Alpha	M	M_H125Y	H	125	Y	3	0.0863	0.2763	2	-0.0881732	26.0339	1.9	0.0881732	26.0339	1.9				5971	1326	FALSE	FALSE	-1	-1	-1	0.624656	0	0
Alpha	M	M_H155Y	H	155	Y	5	0.1715	1	2	-0.0881732	26.0339	1.9	0.0881732	26.0339	1.9				3948	711	FALSE	FALSE	-1	-1	-1	-1	-1	-1
Alpha	M	M_H210Y	H	210	Y	1	0.0494	0.0494	2	-0.0881732	26.0339	1.9	0.0881732	26.0339	1.9				37	2	FALSE	FALSE	-1	-1	-1	-1	-1	-1
Alpha	M	M_I168L	I	168	L	2	0.0359	0.0407	2	0	0	-0.7	0	0	0.7				79	153	FALSE	FALSE	-1	-1	-1	-1	-1	-1
Alpha	M	M_I168T	I	168	T	127	0.0411	0.2963	-1	-0.361905	-12.0537	-5.2	0.361905	12.0537	5.2				1	0	FALSE	FALSE	0.908119	1	1	-1	-1	-1
Alpha	M	M_I201T	I	201	T	1	1	1	-1	-0.361905	-12.0537	-5.2	0.361905	12.0537	5.2				45	0	FALSE	FALSE	-1	-1	-1	-1	-1	-1
Alpha	M	M_I24Q	I	24	Q	40	0.05055	0.1249	-3	0	14.9716	-8	0	14.9716	8				0	0	FALSE	FALSE	0.948847	2	1	-1	-1	-1
Alpha	M	M_I24R	I	24	R	1	0.0577	0.0577	-3	0.99999	43.0281	-9	0.99999	43.0281	9				2	0	FALSE	FALSE	-1	-1	-1	-1	-1	-1
Alpha	M	M_I32F	I	32	F	1	0.0462	0.0462	0	0	34.0162	-1.7	0	34.0162	1.7				8	1	FALSE	FALSE	-1	-1	-1	-1	-1	-1
Alpha	M	M_I48V	I	48	V	5	0.9978	1	3	-0.0261132	-14.0266	-0.3	0.0261132	14.0266	0.3				519	471	FALSE	FALSE	-1	-1	-1	-1	-1	-1
Alpha	M	M_I49V	I	49	V	1	0.048	0.048	3	-0.0261132	-14.0266	-0.3	0.0261132	14.0266	0.3				154	18	FALSE	FALSE	-1	-1	-1	-1	-1	-1
Alpha	M	M_I52T	I	52	T	1	1	1	-1	-0.361905	-12.0537	-5.2	0.361905	12.0537	5.2				1041	134	FALSE	FALSE	-1	-1	-1	-1	-1	-1
Alpha	M	M_I52V	I	52	V	1	0.0986	0.0986	3	-0.0261132	-14.0266	-0.3	0.0261132	14.0266	0.3				173	9	FALSE	FALSE	-1	-1	-1	-1	-1	-1
Alpha	M	M_I80T	I	80	T	1	0.9977	0.9977	-1	-0.361905	-12.0537	-5.2	0.361905	12.0537	5.2				228	11	FALSE	FALSE	-1	-1	-1	-1	-1	-1
Alpha	M	M_I82T	I	82	T	14	0.99705	1	-1	-0.361905	-12.0537	-5.2	0.361905	12.0537	5.2				1243417	645	TRUE	TRUE	0.74107	0	0	-1	-1	-1
Alpha	M	M_I8S	I	8	S	5	0.0333	0.042	-2	-0.299955	-26.0803	-5.3	0.299955	26.0803	5.3				28	7	FALSE	FALSE	-1	-1	-1	-1	-1	-1
Alpha	M	M_K14I	K	14	I	1	0.0336	0.0336	-3	-0.999001	-15.0147	8.4	0.999001	15.0147	8.4				6	0	FALSE	FALSE	-1	-1	-1	-1	-1	-1
Alpha	M	M_K15Q	K	15	Q	1	0.043	0.043	1	-0.999001	-0.0431	0.4	0.999001	0.0431	0.4				262	35	FALSE	FALSE	-1	-1	-1	-1	-1	-1
Alpha	M	M_K15R	K	15	R	1	1	1	2	0.000989001	28.0134	-0.6	0.000989001	28.0134	0.6				275	50	FALSE	FALSE	-1	-1	-1	-1	-1	-1
Alpha	M	M_K166N	K	166	N	3	0.0339	0.0545	0	-0.999001	-14.0697	0.4	0.999001	14.0697	0.4				25	2	FALSE	FALSE	-1	-1	-1	-1	-1	-1
Alpha	M	M_K50T	K	50	T	1	0.0397	0.0397	-1	-1.36091	-27.0684	3.2	1.36091	27.0684	3.2				0	0	FALSE	FALSE	-1	-1	-1	-1	-1	-1
Alpha	M	M_L129Q	L	129	Q	2	0.049	0.0559	-2	0	14.9716	-7.3	0	14.9716	7.3				122	2	FALSE	FALSE	-1	-1	-1	-1	-1	-1
Alpha	M	M_L133I	L	133	I	1	0.0471	0.0471	2	0	0	0.7	0	0	0.7				42	2	FALSE	FALSE	-1	-1	-1	-1	-1	-1
Alpha	M	M_L16F	L	16	F	1	0.9966	0.9966	0	0	34.0162	-1	0	34.0162	1				100	19	FALSE	FALSE	-1	-1	-1	-1	-1	-1
Alpha	M	M_L16V	L	16	V	1	0.0391	0.0391	1	-0.0261132	-14.0266	0.4	0.0261132	14.0266	0.4				4	1	FALSE	FALSE	-1	-1	-1	-1	-1	-1
Alpha	M	M_L206S	L	206	S	1	0.0417	0.0417	-2	-0.299955	-26.0803	-4.6	0.299955	26.0803	4.6				2	2	FALSE	FALSE	-1	-1	-1	-1	-1	-1
Alpha	M	M_L206V	L	206	V	1	0.0303	0.0303	1	-0.0261132	-14.0266	0.4	0.0261132	14.0266	0.4				10	0	FALSE	FALSE	-1	-1	-1	-1	-1	-1
Alpha	M	M_L22P	L	22	P	1	0.0392	0.0392	-3	0.198427	-16.0424	-5.4	0.198427	16.0424	5.4				3	0	FALSE	FALSE	-1	-1	-1	-1	-1	-1
Alpha	M	M_L34F	L	34	F	1	0.9865	0.9865	0	0	34.0162	-1	0	34.0162	1				2644	221	FALSE	FALSE	-1	-1	-1	-1	-1	-1
Alpha	M	M_L54Q	L	54	Q	1	0.0446	0.0446	-2	0	14.9716	-7.3	0	14.9716	7.3				0	0	FALSE	FALSE	-1	-1	-1	-1	-1	-1
Alpha	M	M_L56Q	L	56	Q	1	0.0448	0.0448	-2	0	14.9716	-7.3	0	14.9716	7.3				1	1	FALSE	FALSE	-1	-1	-1	-1	-1	-1
Alpha	M	M_L62S	L	62	S	28	0.03425	0.0462	-2	-0.299955	-26.0803	-4.6	0.299955	26.0803	4.6				4	1	FALSE	FALSE	0.800201	0	0	-1	-1	-1
Alpha	M	M_L67F	L	67	F	1	0.0492	0.0492	0	0	34.0162	-1	0	34.0162	1				246	13	FALSE	FALSE	-1	-1	-1	-1	-1	-1
Alpha	M	M_L67I	L	67	I	3	0.0373	0.042	2	0	0	0.7	0	0	0.7				11	5	FALSE	FALSE	-1	-1	-1	-1	-1	-1
Alpha	M	M_L67Y	L	67	Y	1	0.0519	0.0519	-1	-0.000999001	50.0156	-5.1	0.000999001	50.0156	5.1				6	2	FALSE	FALSE	-1	-1	-1	-1	-1	-1
Alpha	M	M_L87V	L	87	V	9	0.0743	0.2082	1	-0.0261132	-14.0266	0.4	0.0261132	14.0266	0.4				7	0	FALSE	FALSE	0.698197	0	0	-1	-1	-1
Alpha	M	M_L90C	L	90	C	1	0.0513	0.0513	-1	-0.00990099	-10.0147	-1.3	0.00990099	10.0147	1.3				51	22	FALSE	FALSE	-1	-1	-1	-1	-1	-1
Alpha	M	M_M109I	M	109	I	1	0.4578	0.4578	1	0.259747	-18.0384	2.6	0.259747	18.0384	2.6				1740	517	FALSE	FALSE	-1	-1	-1	-1	-1	-1
Alpha	M	M_M91L	M	91	L	1	0.0517	0.0517	2	0.259747	-18.0384	1.9	0.259747	18.0384	1.9				213	14	FALSE	FALSE	-1	-1	-1	-1	-1	-1
Alpha	M	M_N113K	N	113	K	1	0.0875	0.0875	0	0.999001	14.0697	-0.4	0.999001	14.0697	0.4				6	0	FALSE	FALSE	-1	-1	-1	-1	-1	-1
Alpha	M	M_N121T	N	121	T	1	0.0476	0.0476	0	-0.361905	-12.9987	2.8	0.361905	12.9987	2.8				5	1	FALSE	FALSE	-1	-1	-1	-1	-1	-1
Alpha	M	M_N207Y	N	207	Y	2	0.0351	0.0399	-2	-0.000999001	49.0706	2.2	0.000999001	49.0706	2.2				17	2	FALSE	FALSE	-1	-1	-1	-1	-1	-1
Alpha	M	M_N216K	N	216	K	1	0.0356	0.0356	0	0.999001	14.0697	-0.4	0.999001	14.0697	0.4				3	0	FALSE	FALSE	-1	-1	-1	-1	-1	-1
Alpha	M	M_N21F	N	21	F	60	0.05335	0.2195	-3	0	33.0712	6.3	0	33.0712	6.3				0	0	FALSE	FALSE	0.978926	2	1	-1	-1	-1
Alpha	M	M_N41K	N	41	K	1	0.0547	0.0547	0	0.999001	14.0697	-0.4	0.999001	14.0697	0.4				4	1	FALSE	FALSE	-1	-1	-1	-1	-1	-1
Alpha	M	M_N43S	N	43	S	1	0.9922	0.9922	1	-0.299955	-27.0253	2.7	0.299955	27.0253	2.7				330	13	FALSE	FALSE	-1	-1	-1	-1	-1	-1
Alpha	M	M_N5S	N	5	S	1	0.7035	0.7035	1	-0.299955	-27.0253	2.7	0.299955	27.0253	2.7				56	5	FALSE	FALSE	-1	-1	-1	-1	-1	-1
Alpha	M	M_P114V	P	114	V	5	0.0366	0.0926	-2	-0.22454	2.0158	5.8	0.22454	2.0158	5.8				2	0	FALSE	FALSE	-1	-1	-1	-1	-1	-1
Alpha	M	M_P132T	P	132	T	1	0.0329	0.0329	-1	-0.560332	3.9887	0.9	0.560332	3.9887	0.9				4	0	FALSE	FALSE	-1	-1	-1	-1	-1	-1
Alpha	M	M_P132W	P	132	W	1	0.0657	0.0657	-4	-0.198427	89.0947	0.7	0.198427	89.0947	0.7				0	0	FALSE	FALSE	-1	-1	-1	-1	-1	-1
Alpha	M	M_Q19H	Q	19	H	62	0.04875	0.1118	0	0.0871742	9.0101	0.3	0.0871742	9.0101	0.3				91	32	FALSE	FALSE	0.978926	2	1	-1	-1	-1
Alpha	M	M_R131N	R	131	N	3	0.1216	0.4412	0	-0.99999	-42.0831	1	0.99999	42.0831	1				3	0	FALSE	FALSE	-1	-1	-1	-1	-1	-1
Alpha	M	M_R131S	R	131	S	3	0.0314	0.1176	-1	-1.29995	-69.1084	3.7	1.29995	69.1084	3.7				2	1	FALSE	FALSE	-1	-1	-1	-1	-1	-1
Alpha	M	M_R131T	R	131	T	2	0.1706	0.2745	-1	-1.3619	-55.0818	3.8	1.3619	55.0818	3.8				19	3	FALSE	FALSE	-1	-1	-1	-1	-1	-1
Alpha	M	M_R150L	R	150	L	1	0.0593	0.0593	-2	-0.99999	-43.0281	8.3	0.99999	43.0281	8.3				122	9	FALSE	FALSE	-1	-1	-1	-1	-1	-1
Alpha	M	M_R158L	R	158	L	1	0.9933	0.9933	-2	-0.99999	-43.0281	8.3	0.99999	43.0281	8.3				563	52	FALSE	FALSE	-1	-1	-1	-1	-1	-1
Alpha	M	M_R174G	R	174	G	1	0.0366	0.0366	-2	-0.99999	-99.1344	4.1	0.99999	99.1344	4.1				1	0	FALSE	FALSE	-1	-1	-1	-1	-1	-1
Alpha	M	M_R198C	R	198	C	1	0.0521	0.0521	-3	-1.00989	-53.0428	7	1.00989	53.0428	7				7	4	FALSE	FALSE	-1	-1	-1	-1	-1	-1
Alpha	M	M_R198S	R	198	S	1	0.0331	0.0331	-1	-1.29995	-69.1084	3.7	1.29995	69.1084	3.7				2	0	FALSE	FALSE	-1	-1	-1	-1	-1	-1
Alpha	M	M_R200C	R	200	C	1	0.0332	0.0332	-3	-1.00989	-53.0428	7	1.00989	53.0428	7				0	0	FALSE	FALSE	-1	-1	-1	-1	-1	-1
Alpha	M	M_R44S	R	44	S	1	0.0417	0.0417	-1	-1.29995	-69.1084	3.7	1.29995	69.1084	3.7				122	191	FALSE	FALSE	-1	-1	-1	-1	-1	-1
Alpha	M	M_S108T	S	108	T	1	0.0469	0.0469	1	-0.0619499	14.0266	0.1	0.0619499	14.0266	0.1				18	16	FALSE	FALSE	-1	-1	-1	-1	-1	-1
Alpha	M	M_S136I	S	136	I	1	0.0673	0.0673	-2	0.299955	26.0803	5.3	0.299955	26.0803	5.3				27	5	FALSE	FALSE	-1	-1	-1	-1	-1	-1
Alpha	M	M_S136N	S	136	N	7	0.9967	1	1	0.299955	27.0253	-2.7	0.299955	27.0253	2.7				1411	74	FALSE	FALSE	0.74247	0	0	-1	-1	-1
Alpha	M	M_S173K	S	173	K	21	0.0683	0.183	0	1.29896	41.095	-3.1	1.29896	41.095	3.1				828	49	FALSE	FALSE	0.835279	0	0	-1	-1	-1
Alpha	M	M_S184L	S	184	L	1	1	1	-2	0.299955	26.0803	4.6	0.299955	26.0803	4.6				25	7	FALSE	FALSE	-1	-1	-1	-1	-1	-1
Alpha	M	M_S197R	S	197	R	1	0.0729	0.0729	-1	1.29995	69.1084	-3.7	1.29995	69.1084	3.7				3	6	FALSE	FALSE	-1	-1	-1	-1	-1	-1
Alpha	M	M_S211F	S	211	F	2	0.0448	0.055	-2	0.299955	60.0965	3.6	0.299955	60.0965	3.6				21	3	FALSE	FALSE	-1	-1	-1	-1	-1	-1
Alpha	M	M_S212N	S	212	N	1	0.6778	0.6778	1	0.299955	27.0253	-2.7	0.299955	27.0253	2.7				260	39	FALSE	FALSE	-1	-1	-1	-1	-1	-1
Alpha	M	M_S212R	S	212	R	1	0.0361	0.0361	-1	1.29995	69.1084	-3.7	1.29995	69.1084	3.7				30	28	FALSE	FALSE	-1	-1	-1	-1	-1	-1
Alpha	M	M_S4F	S	4	F	1	0.1	0.1	-2	0.299955	60.0965	3.6	0.299955	60.0965	3.6				2335	273	FALSE	FALSE	-1	-1	-1	-1	-1	-1
Alpha	M	M_S94T	S	94	T	1	0.0435	0.0435	1	-0.0619499	14.0266	0.1	0.0619499	14.0266	0.1				370	30	FALSE	FALSE	-1	-1	-1	-1	-1	-1
Alpha	M	M_T116I	T	116	I	1	0.0395	0.0395	-1	0.361905	12.0537	5.2	0.361905	12.0537	5.2				4	4	FALSE	FALSE	-1	-1	-1	-1	-1	-1
Alpha	M	M_T130N	T	130	N	2	0.05235	0.0618	0	0.361905	12.9987	-2.8	0.361905	12.9987	2.8				7	0	FALSE	FALSE	-1	-1	-1	-1	-1	-1
Alpha	M	M_T169S	T	169	S	15	0.0647	0.35	1	0.0619499	-14.0266	-0.1	0.0619499	14.0266	0.1				7	2	FALSE	FALSE	0.692008	0	0	-1	-1	-1
Alpha	M	M_T172L	T	172	L	28	0.07405	0.1796	-1	0.361905	12.0537	4.5	0.361905	12.0537	4.5				1	0	FALSE	FALSE	0.835279	0	0	-1	-1	-1
Alpha	M	M_T172R	T	172	R	256	0.04795	0.6737	-1	1.3619	55.0818	-3.8	1.3619	55.0818	3.8				5	1	FALSE	FALSE	0.843212	0	0	-1	-1	-1
Alpha	M	M_T175K	T	175	K	1	0.0349	0.0349	-1	1.36091	27.0684	-3.2	1.36091	27.0684	3.2				53	2	FALSE	FALSE	-1	-1	-1	-1	-1	-1
Alpha	M	M_T175M	T	175	M	1	0.1231	0.1231	-1	0.102158	30.0921	2.6	0.102158	30.0921	2.6				885	1582	FALSE	FALSE	-1	-1	-1	0.913788	1	1
Alpha	M	M_T208I	T	208	I	1	0.0321	0.0321	-1	0.361905	12.0537	5.2	0.361905	12.0537	5.2				1541	320	FALSE	FALSE	-1	-1	-1	-1	-1	-1
Alpha	M	M_T61I	T	61	I	19	0.0353	0.0438	-1	0.361905	12.0537	5.2	0.361905	12.0537	5.2				8	1	FALSE	FALSE	0.800201	0	0	-1	-1	-1
Alpha	M	M_T77S	T	77	S	1	0.9978	0.9978	1	0.0619499	-14.0266	-0.1	0.0619499	14.0266	0.1				67	8	FALSE	FALSE	-1	-1	-1	-1	-1	-1
Alpha	M	M_T7I	T	7	I	1	0.8559	0.8559	-1	0.361905	12.0537	5.2	0.361905	12.0537	5.2				1199	141	FALSE	FALSE	-1	-1	-1	-1	-1	-1
Alpha	M	M_T7N	T	7	N	7	0.0326	0.0485	0	0.361905	12.9987	-2.8	0.361905	12.9987	2.8				96	12	FALSE	FALSE	0.290599	0	0	-1	-1	-1
Alpha	M	M_V10I	V	10	I	1	0.146	0.146	3	0.0261132	14.0266	0.3	0.0261132	14.0266	0.3				755	98	FALSE	FALSE	-1	-1	-1	-1	-1	-1
Alpha	M	M_V122L	V	122	L	3	0.04	0.0526	1	0.0261132	14.0266	-0.4	0.0261132	14.0266	0.4				153	8	FALSE	FALSE	-1	-1	-1	-1	-1	-1
Alpha	M	M_V170F	V	170	F	8	0.05065	0.1342	-1	0.0261132	48.0428	-1.4	0.0261132	48.0428	1.4				1	1	FALSE	FALSE	0.760398	0	0	-1	-1	-1
Alpha	M	M_V170L	V	170	L	181	0.0459	0.5893	1	0.0261132	14.0266	-0.4	0.0261132	14.0266	0.4				47	10	FALSE	FALSE	0.843212	0	0	-1	-1	-1
Alpha	M	M_V221D	V	221	D	1	0.1153	0.1153	-3	-0.969585	15.9564	-7.7	0.969585	15.9564	7.7				0	0	FALSE	FALSE	-1	-1	-1	-1	-1	-1
Alpha	M	M_V23L	V	23	L	3	0.05	0.9024	1	0.0261132	14.0266	-0.4	0.0261132	14.0266	0.4				2618	351	FALSE	FALSE	-1	-1	-1	-1	-1	-1
Alpha	M	M_V60I	V	60	I	3	0.0734	0.102	3	0.0261132	14.0266	0.3	0.0261132	14.0266	0.3				184	7	FALSE	FALSE	-1	-1	-1	-1	-1	-1
Alpha	M	M_V66A	V	66	A	1	0.9959	0.9959	0	0.0618862	-28.0531	-2.4	0.0618862	28.0531	2.4				103	10	FALSE	FALSE	-1	-1	-1	-1	-1	-1
Alpha	M	M_V66S	V	66	S	1	0.0521	0.0521	-2	-0.273842	-12.0537	-5	0.273842	12.0537	5				2	0	FALSE	FALSE	-1	-1	-1	-1	-1	-1
Alpha	M	M_V66T	V	66	T	3	0.032	0.0404	0	-0.335792	1.9729	-4.9	0.335792	1.9729	4.9				0	0	FALSE	FALSE	-1	-1	-1	-1	-1	-1
Alpha	M	M_V70F	V	70	F	8	0.99185	1	-1	0.0261132	48.0428	-1.4	0.0261132	48.0428	1.4				1748	1400	FALSE	FALSE	0.911589	1	1	0.76815	0	0
Alpha	M	M_V70L	V	70	L	1	0.9976	0.9976	1	0.0261132	14.0266	-0.4	0.0261132	14.0266	0.4				6526	348	FALSE	FALSE	-1	-1	-1	-1	-1	-1
Alpha	M	M_V88L	V	88	L	1	0.0349	0.0349	1	0.0261132	14.0266	-0.4	0.0261132	14.0266	0.4				194	52	FALSE	FALSE	-1	-1	-1	-1	-1	-1
Alpha	M	M_V88S	V	88	S	2	0.0603	0.0824	-2	-0.273842	-12.0537	-5	0.273842	12.0537	5				35	7	FALSE	FALSE	-1	-1	-1	-1	-1	-1
Alpha	M	M_W20C	W	20	C	1	0.0507	0.0507	-2	-0.00990099	-83.067	3.4	0.00990099	83.067	3.4				7	1	FALSE	FALSE	-1	-1	-1	-1	-1	-1
Alpha	M	M_W55C	W	55	C	1	0.0629	0.0629	-2	-0.00990099	-83.067	3.4	0.00990099	83.067	3.4				57	9	FALSE	FALSE	-1	-1	-1	-1	-1	-1
Alpha	M	M_W55L	W	55	L	1	0.0317	0.0317	-2	0	-73.0523	4.7	0	73.0523	4.7				67	13	FALSE	FALSE	-1	-1	-1	-1	-1	-1
Alpha	M	M_W58G	W	58	G	1	0.0323	0.0323	-2	0	-129.159	0.5	0	129.159	0.5				1	0	FALSE	FALSE	-1	-1	-1	-1	-1	-1
Alpha	M	M_W58L	W	58	L	1	0.0498	0.0498	-2	0	-73.0523	4.7	0	73.0523	4.7				7	0	FALSE	FALSE	-1	-1	-1	-1	-1	-1
Alpha	M	M_W92R	W	92	R	1	0.0435	0.0435	-3	0.99999	-30.0242	-3.6	0.99999	30.0242	3.6				50	10	FALSE	FALSE	-1	-1	-1	-1	-1	-1
Alpha	M	M_Y199D	Y	199	D	1	0.0408	0.0408	-3	-0.994699	-48.0858	-2.2	0.994699	48.0858	2.2				1	0	FALSE	FALSE	-1	-1	-1	-1	-1	-1
Alpha	M	M_Y71G	Y	71	G	1	0.0848	0.0848	-3	0.000999001	-106.122	0.9	0.000999001	106.122	0.9				1	0	FALSE	FALSE	-1	-1	-1	-1	-1	-1
Alpha	N	N_A119S	A	119	S	9	0.9983	1	1	-0.335728	15.9994	-2.6	0.335728	15.9994	2.6				3944	2297	FALSE	FALSE	0.878685	0	0	0.989829	2	1
Alpha	N	N_A12G	A	12	G	5	0.9969	0.9983	0	-0.035773	-14.0266	-2.2	0.035773	14.0266	2.2				1979	647	FALSE	FALSE	-1	-1	-1	-1	-1	-1
Alpha	N	N_A12S	A	12	S	1	0.9989	0.9989	1	-0.335728	15.9994	-2.6	0.335728	15.9994	2.6				1857	305	FALSE	FALSE	-1	-1	-1	-1	-1	-1
Alpha	N	N_A138P	A	138	P	1	0.0986	0.0986	-1	0.162654	26.0373	-3.4	0.162654	26.0373	3.4				0	1	FALSE	FALSE	-1	-1	-1	-1	-1	-1
Alpha	N	N_A152S	A	152	S	1	1	1	1	-0.335728	15.9994	-2.6	0.335728	15.9994	2.6				7841	669	FALSE	FALSE	-1	-1	-1	-1	-1	-1
Alpha	N	N_A152V	A	152	V	4	0.17885	0.9916	0	-0.0618862	28.0531	2.4	0.0618862	28.0531	2.4				2460	56	FALSE	FALSE	-1	-1	-1	-1	-1	-1
Alpha	N	N_A155D	A	155	D	1	0.0485	0.0485	-2	-1.03147	44.0095	-5.3	1.03147	44.0095	5.3				64	2	FALSE	FALSE	-1	-1	-1	-1	-1	-1
Alpha	N	N_A155S	A	155	S	1	0.0335	0.0335	1	-0.335728	15.9994	-2.6	0.335728	15.9994	2.6				850	46	FALSE	FALSE	-1	-1	-1	-1	-1	-1
Alpha	N	N_A156S	A	156	S	2	0.989	0.9902	1	-0.335728	15.9994	-2.6	0.335728	15.9994	2.6				4543	239	FALSE	FALSE	-1	-1	-1	-1	-1	-1
Alpha	N	N_A182S	A	182	S	3	0.1248	0.9977	1	-0.335728	15.9994	-2.6	0.335728	15.9994	2.6				3165	1271	FALSE	FALSE	-1	-1	-1	0.897847	0	0
Alpha	N	N_A217S	A	217	S	1	1	1	1	-0.335728	15.9994	-2.6	0.335728	15.9994	2.6				1916	152	FALSE	FALSE	-1	-1	-1	-1	-1	-1
Alpha	N	N_A220S	A	220	S	3	0.0343	0.0413	1	-0.335728	15.9994	-2.6	0.335728	15.9994	2.6				430	10	FALSE	FALSE	-1	-1	-1	-1	-1	-1
Alpha	N	N_A220T	A	220	T	1	0.0404	0.0404	0	-0.397678	30.026	-2.5	0.397678	30.026	2.5				199	25	FALSE	FALSE	-1	-1	-1	-1	-1	-1
Alpha	N	N_A220V	A	220	V	2	0.0349	0.0381	0	-0.0618862	28.0531	2.4	0.0618862	28.0531	2.4				1793	103499	FALSE	FALSE	-1	-1	-1	0.993675	19	1
Alpha	N	N_A251S	A	251	S	5	0.0522	0.1582	1	-0.335728	15.9994	-2.6	0.335728	15.9994	2.6				1106	240	FALSE	FALSE	-1	-1	-1	-1	-1	-1
Alpha	N	N_A252D	A	252	D	2	0.03615	0.0381	-2	-1.03147	44.0095	-5.3	1.03147	44.0095	5.3				15	3	FALSE	FALSE	-1	-1	-1	-1	-1	-1
Alpha	N	N_A252S	A	252	S	2	0.5245	0.985	1	-0.335728	15.9994	-2.6	0.335728	15.9994	2.6				1650	751	FALSE	FALSE	-1	-1	-1	-1	-1	-1
Alpha	N	N_A254P	A	254	P	1	0.181	0.181	-1	0.162654	26.0373	-3.4	0.162654	26.0373	3.4				7	3	FALSE	FALSE	-1	-1	-1	-1	-1	-1
Alpha	N	N_A254S	A	254	S	2	0.0592	0.0805	1	-0.335728	15.9994	-2.6	0.335728	15.9994	2.6				389	31	FALSE	FALSE	-1	-1	-1	-1	-1	-1
Alpha	N	N_A254T	A	254	T	1	0.0775	0.0775	0	-0.397678	30.026	-2.5	0.397678	30.026	2.5				100	5	FALSE	FALSE	-1	-1	-1	-1	-1	-1
Alpha	N	N_A254V	A	254	V	23	0.0467	0.0914	0	-0.0618862	28.0531	2.4	0.0618862	28.0531	2.4				173	28	FALSE	FALSE	0.623531	0	0	-1	-1	-1
Alpha	N	N_A264V	A	264	V	1	0.037	0.037	0	-0.0618862	28.0531	2.4	0.0618862	28.0531	2.4				16	5	FALSE	FALSE	-1	-1	-1	-1	-1	-1
Alpha	N	N_A267S	A	267	S	1	0.19	0.19	1	-0.335728	15.9994	-2.6	0.335728	15.9994	2.6				1356	64	FALSE	FALSE	-1	-1	-1	-1	-1	-1
Alpha	N	N_A273S	A	273	S	1	0.038	0.038	1	-0.335728	15.9994	-2.6	0.335728	15.9994	2.6				1741	225	FALSE	FALSE	-1	-1	-1	-1	-1	-1
Alpha	N	N_A273V	A	273	V	1	0.1159	0.1159	0	-0.0618862	28.0531	2.4	0.0618862	28.0531	2.4				18	5	FALSE	FALSE	-1	-1	-1	-1	-1	-1
Alpha	N	N_A305V	A	305	V	45	0.0375	0.0909	0	-0.0618862	28.0531	2.4	0.0618862	28.0531	2.4				49	18	FALSE	FALSE	0.13794	0	0	-1	-1	-1
Alpha	N	N_A313P	A	313	P	1	0.1	0.1	-1	0.162654	26.0373	-3.4	0.162654	26.0373	3.4				1	0	FALSE	FALSE	-1	-1	-1	-1	-1	-1
Alpha	N	N_A313S	A	313	S	1	0.0698	0.0698	1	-0.335728	15.9994	-2.6	0.335728	15.9994	2.6				370	79	FALSE	FALSE	-1	-1	-1	-1	-1	-1
Alpha	N	N_A336T	A	336	T	2	0.04005	0.0411	0	-0.397678	30.026	-2.5	0.397678	30.026	2.5				148	4	FALSE	FALSE	-1	-1	-1	-1	-1	-1
Alpha	N	N_A336V	A	336	V	1	0.0379	0.0379	0	-0.0618862	28.0531	2.4	0.0618862	28.0531	2.4				1321	105	FALSE	FALSE	-1	-1	-1	-1	-1	-1
Alpha	N	N_A359S	A	359	S	2	0.5262	1	1	-0.335728	15.9994	-2.6	0.335728	15.9994	2.6				3304	581	FALSE	FALSE	-1	-1	-1	-1	-1	-1
Alpha	N	N_A359V	A	359	V	1	0.038	0.038	0	-0.0618862	28.0531	2.4	0.0618862	28.0531	2.4				128	15	FALSE	FALSE	-1	-1	-1	-1	-1	-1
Alpha	N	N_A35S	A	35	S	1	0.9982	0.9982	1	-0.335728	15.9994	-2.6	0.335728	15.9994	2.6				1094	208	FALSE	FALSE	-1	-1	-1	-1	-1	-1
Alpha	N	N_A35V	A	35	V	1	0.0322	0.0322	0	-0.0618862	28.0531	2.4	0.0618862	28.0531	2.4				3061	393	FALSE	FALSE	-1	-1	-1	-1	-1	-1
Alpha	N	N_A376V	A	376	V	3	0.9887	0.9896	0	-0.0618862	28.0531	2.4	0.0618862	28.0531	2.4				904	281	FALSE	FALSE	-1	-1	-1	-1	-1	-1
Alpha	N	N_A381V	A	381	V	1	0.1345	0.1345	0	-0.0618862	28.0531	2.4	0.0618862	28.0531	2.4				488	133	FALSE	FALSE	-1	-1	-1	-1	-1	-1
Alpha	N	N_A398V	A	398	V	3	0.9849	0.998	0	-0.0618862	28.0531	2.4	0.0618862	28.0531	2.4				7251	5309	FALSE	FALSE	-1	-1	-1	0.981216	2	1
Alpha	N	N_A414D	A	414	D	1	0.0304	0.0304	-2	-1.03147	44.0095	-5.3	1.03147	44.0095	5.3				18	8	FALSE	FALSE	-1	-1	-1	-1	-1	-1
Alpha	N	N_A414G	A	414	G	3	0.0374	0.062	0	-0.035773	-14.0266	-2.2	0.035773	14.0266	2.2				72	3	FALSE	FALSE	-1	-1	-1	-1	-1	-1
Alpha	N	N_A414N	A	414	N	1	0.0311	0.0311	-2	-0.035773	43.0247	-5.3	0.035773	43.0247	5.3				0	0	FALSE	FALSE	-1	-1	-1	-1	-1	-1
Alpha	N	N_A414T	A	414	T	1	0.0387	0.0387	0	-0.397678	30.026	-2.5	0.397678	30.026	2.5				288	12	FALSE	FALSE	-1	-1	-1	-1	-1	-1
Alpha	N	N_A414V	A	414	V	2	0.5598	0.9934	0	-0.0618862	28.0531	2.4	0.0618862	28.0531	2.4				512	63	FALSE	FALSE	-1	-1	-1	-1	-1	-1
Alpha	N	N_A90S	A	90	S	4	0.19945	0.9979	1	-0.335728	15.9994	-2.6	0.335728	15.9994	2.6				6470	367	FALSE	FALSE	-1	-1	-1	-1	-1	-1
Alpha	N	N_D103Y	D	103	Y	2	0.51985	0.9993	-3	0.994699	48.0858	2.2	0.994699	48.0858	2.2				793	2500	FALSE	FALSE	-1	-1	-1	0.913442	1	1
Alpha	N	N_D144H	D	144	H	4	0.98835	0.9981	-1	1.08287	22.0519	0.3	1.08287	22.0519	0.3				2907	608	FALSE	FALSE	-1	-1	-1	-1	-1	-1
Alpha	N	N_D144Y	D	144	Y	1	0.9961	0.9961	-3	0.994699	48.0858	2.2	0.994699	48.0858	2.2				1583	894	FALSE	FALSE	-1	-1	-1	-1	-1	-1
Alpha	N	N_D216N	D	216	N	1	0.041	0.041	1	0.995698	-0.9848	0	0.995698	0.9848	0				49	1	FALSE	FALSE	-1	-1	-1	-1	-1	-1
Alpha	N	N_D22H	D	22	H	1	0.0405	0.0405	-1	1.08287	22.0519	0.3	1.08287	22.0519	0.3				134	62	FALSE	FALSE	-1	-1	-1	-1	-1	-1
Alpha	N	N_D22N	D	22	N	1	0.9987	0.9987	1	0.995698	-0.9848	0	0.995698	0.9848	0				578	47	FALSE	FALSE	-1	-1	-1	-1	-1	-1
Alpha	N	N_D288N	D	288	N	3	0.9879	1	1	0.995698	-0.9848	0	0.995698	0.9848	0				1267	30	FALSE	FALSE	-1	-1	-1	-1	-1	-1
Alpha	N	N_D297K	D	297	K	1	0.0485	0.0485	-1	1.9947	13.0849	-0.4	1.9947	13.0849	0.4				88	38	FALSE	FALSE	-1	-1	-1	-1	-1	-1
Alpha	N	N_D348Y	D	348	Y	1	1	1	-3	0.994699	48.0858	2.2	0.994699	48.0858	2.2				1075	227	FALSE	FALSE	-1	-1	-1	-1	-1	-1
Alpha	N	N_D371E	D	371	E	1	0.9303	0.9303	2	0.0776616	14.0266	0	0.0776616	14.0266	0				842	65	FALSE	FALSE	-1	-1	-1	-1	-1	-1
Alpha	N	N_D371K	D	371	K	1	0.0547	0.0547	-1	1.9947	13.0849	-0.4	1.9947	13.0849	0.4				5	2	FALSE	FALSE	-1	-1	-1	-1	-1	-1
Alpha	N	N_D371Y	D	371	Y	4	0.9946	0.9989	-3	0.994699	48.0858	2.2	0.994699	48.0858	2.2				185	2154	FALSE	FALSE	-1	-1	-1	0.979908	6	1
Alpha	N	N_D377A	D	377	A	1	0.9416	0.9416	-2	1.03147	-44.0095	5.3	1.03147	44.0095	5.3				64	20	FALSE	FALSE	-1	-1	-1	-1	-1	-1
Alpha	N	N_D377G	D	377	G	1	0.1282	0.1282	-1	0.995698	-58.0361	3.1	0.995698	58.0361	3.1				711	288	FALSE	FALSE	-1	-1	-1	-1	-1	-1
Alpha	N	N_D377Y	D	377	Y	89	0.9971	1	-3	0.994699	48.0858	2.2	0.994699	48.0858	2.2				1228083	14897	TRUE	TRUE	0.449543	0	0	0.834404	0	0
Alpha	N	N_D399H	D	399	H	1	0.0382	0.0382	-1	1.08287	22.0519	0.3	1.08287	22.0519	0.3				715	92	FALSE	FALSE	-1	-1	-1	-1	-1	-1
Alpha	N	N_D399Y	D	399	Y	1	0.9948	0.9948	-3	0.994699	48.0858	2.2	0.994699	48.0858	2.2				1203	320	FALSE	FALSE	-1	-1	-1	-1	-1	-1
Alpha	N	N_D3G	D	3	G	28	0.0399	0.0674	-1	0.995698	-58.0361	3.1	0.995698	58.0361	3.1				556	40	FALSE	FALSE	0.913209	1	1	-1	-1	-1
Alpha	N	N_D3I	D	3	I	1	0.9669	0.9669	-3	0.995698	-1.9298	8	0.995698	1.9298	8				1	0	FALSE	FALSE	-1	-1	-1	-1	-1	-1
Alpha	N	N_D3T	D	3	T	1	0.0308	0.0308	-1	0.633793	-13.9835	2.8	0.633793	13.9835	2.8				0	0	FALSE	FALSE	-1	-1	-1	-1	-1	-1
Alpha	N	N_D3V	D	3	V	2	0.05005	0.0537	-3	0.969585	-15.9564	7.7	0.969585	15.9564	7.7				121	4	FALSE	FALSE	-1	-1	-1	-1	-1	-1
Alpha	N	N_D3Y	D	3	Y	8	0.094	1	-3	0.994699	48.0858	2.2	0.994699	48.0858	2.2				1059	627	FALSE	FALSE	0.28992	0	0	-1	-1	-1
Alpha	N	N_D401Y	D	401	Y	4	0.99485	1	-3	0.994699	48.0858	2.2	0.994699	48.0858	2.2				2726	2971	FALSE	FALSE	-1	-1	-1	0.898031	0	0
Alpha	N	N_D402A	D	402	A	1	0.9966	0.9966	-2	1.03147	-44.0095	5.3	1.03147	44.0095	5.3				61	4	FALSE	FALSE	-1	-1	-1	-1	-1	-1
Alpha	N	N_D402Y	D	402	Y	1	0.9985	0.9985	-3	0.994699	48.0858	2.2	0.994699	48.0858	2.2				3268	986	FALSE	FALSE	-1	-1	-1	-1	-1	-1
Alpha	N	N_D415E	D	415	E	2	0.04465	0.0561	2	0.0776616	14.0266	0	0.0776616	14.0266	0				389	8	FALSE	FALSE	-1	-1	-1	-1	-1	-1
Alpha	N	N_D415G	D	415	G	12	0.036	0.0461	-1	0.995698	-58.0361	3.1	0.995698	58.0361	3.1				199	39	FALSE	FALSE	0.260515	0	0	-1	-1	-1
Alpha	N	N_D415V	D	415	V	23	0.0405	0.0746	-3	0.969585	-15.9564	7.7	0.969585	15.9564	7.7				9	1	FALSE	FALSE	0.593906	0	0	-1	-1	-1
Alpha	N	N_D63F	D	63	F	2	0.0323	0.0343	-3	0.995698	32.0864	6.3	0.995698	32.0864	6.3				0	2	FALSE	FALSE	-1	-1	-1	-1	-1	-1
Alpha	N	N_D63G	D	63	G	1	0.2011	0.2011	-1	0.995698	-58.0361	3.1	0.995698	58.0361	3.1				1207267	461	TRUE	TRUE	-1	-1	-1	-1	-1	-1
Alpha	N	N_D63N	D	63	N	2	0.71075	0.9888	1	0.995698	-0.9848	0	0.995698	0.9848	0				1036	102	FALSE	FALSE	-1	-1	-1	-1	-1	-1
Alpha	N	N_D63Y	D	63	Y	1	0.5039	0.5039	-3	0.994699	48.0858	2.2	0.994699	48.0858	2.2				1326	140	FALSE	FALSE	-1	-1	-1	-1	-1	-1
Alpha	N	N_D81Y	D	81	Y	1	0.0302	0.0302	-3	0.994699	48.0858	2.2	0.994699	48.0858	2.2				455	185	FALSE	FALSE	-1	-1	-1	-1	-1	-1
Alpha	N	N_E174G	E	174	G	1	0.0864	0.0864	-2	0.918037	-72.0627	3.1	0.918037	72.0627	3.1				1	0	FALSE	FALSE	-1	-1	-1	-1	-1	-1
Alpha	N	N_E231D	E	231	D	1	0.0342	0.0342	2	-0.0776616	-14.0266	0	0.0776616	14.0266	0				339	9	FALSE	FALSE	-1	-1	-1	-1	-1	-1
Alpha	N	N_E253D	E	253	D	1	0.0571	0.0571	2	-0.0776616	-14.0266	0	0.0776616	14.0266	0				476	193	FALSE	FALSE	-1	-1	-1	-1	-1	-1
Alpha	N	N_E253K	E	253	K	2	0.05865	0.0747	1	1.91704	-0.9417	-0.4	1.91704	0.9417	0.4				54	6	FALSE	FALSE	-1	-1	-1	-1	-1	-1
Alpha	N	N_E290S	E	290	S	1	0.0349	0.0349	0	0.618082	-42.0367	2.7	0.618082	42.0367	2.7				0	0	FALSE	FALSE	-1	-1	-1	-1	-1	-1
Alpha	N	N_E31D	E	31	D	1	0.0305	0.0305	2	-0.0776616	-14.0266	0	0.0776616	14.0266	0				33	13	FALSE	FALSE	-1	-1	-1	-1	-1	-1
Alpha	N	N_E31G	E	31	G	1	0.8972	0.8972	-2	0.918037	-72.0627	3.1	0.918037	72.0627	3.1				900	77	FALSE	FALSE	-1	-1	-1	-1	-1	-1
Alpha	N	N_E31Q	E	31	Q	1	0.9987	0.9987	2	0.918037	-0.9848	0	0.918037	0.9848	0				66	44	FALSE	FALSE	-1	-1	-1	-1	-1	-1
Alpha	N	N_E367D	E	367	D	1	0.8429	0.8429	2	-0.0776616	-14.0266	0	0.0776616	14.0266	0				564	156	FALSE	FALSE	-1	-1	-1	-1	-1	-1
Alpha	N	N_E367G	E	367	G	1	0.0517	0.0517	-2	0.918037	-72.0627	3.1	0.918037	72.0627	3.1				166	79	FALSE	FALSE	-1	-1	-1	-1	-1	-1
Alpha	N	N_E367K	E	367	K	3	0.05	0.0503	1	1.91704	-0.9417	-0.4	1.91704	0.9417	0.4				24	31	FALSE	FALSE	-1	-1	-1	-1	-1	-1
Alpha	N	N_E367V	E	367	V	1	0.069	0.069	-2	0.891923	-29.983	7.7	0.891923	29.983	7.7				37	5	FALSE	FALSE	-1	-1	-1	-1	-1	-1
Alpha	N	N_E378Q	E	378	Q	12	0.9936	1	2	0.918037	-0.9848	0	0.918037	0.9848	0				1886	886	FALSE	FALSE	0.616875	0	0	-1	-1	-1
Alpha	N	N_E378V	E	378	V	1	1	1	-2	0.891923	-29.983	7.7	0.891923	29.983	7.7				832	35	FALSE	FALSE	-1	-1	-1	-1	-1	-1
Alpha	N	N_E62K	E	62	K	1	0.9215	0.9215	1	1.91704	-0.9417	-0.4	1.91704	0.9417	0.4				76	53	FALSE	FALSE	-1	-1	-1	-1	-1	-1
Alpha	N	N_E62V	E	62	V	5	0.0329	0.0359	-2	0.891923	-29.983	7.7	0.891923	29.983	7.7				7	49	FALSE	FALSE	-1	-1	-1	-1	-1	-1
Alpha	N	N_F110A	F	110	A	1	0.0566	0.0566	-2	0.035773	-76.0959	-1	0.035773	76.0959	1				0	0	FALSE	FALSE	-1	-1	-1	-1	-1	-1
Alpha	N	N_F110L	F	110	L	1	0.0472	0.0472	0	0	-34.0162	1	0	34.0162	1				8	1	FALSE	FALSE	-1	-1	-1	-1	-1	-1
Alpha	N	N_F17L	F	17	L	3	0.0996	0.1068	0	0	-34.0162	1	0	34.0162	1				119	5	FALSE	FALSE	-1	-1	-1	-1	-1	-1
Alpha	N	N_F17V	F	17	V	1	0.0303	0.0303	-1	-0.0261132	-48.0428	1.4	0.0261132	48.0428	1.4				8	0	FALSE	FALSE	-1	-1	-1	-1	-1	-1
Alpha	N	N_F274I	F	274	I	1	0.2698	0.2698	0	0	-34.0162	1.7	0	34.0162	1.7				12	2	FALSE	FALSE	-1	-1	-1	-1	-1	-1
Alpha	N	N_F307L	F	307	L	2	0.997	1	0	0	-34.0162	1	0	34.0162	1				957	43	FALSE	FALSE	-1	-1	-1	-1	-1	-1
Alpha	N	N_F314C	F	314	C	1	0.0311	0.0311	-2	-0.00990099	-44.0309	-0.3	0.00990099	44.0309	0.3				0	0	FALSE	FALSE	-1	-1	-1	-1	-1	-1
Alpha	N	N_F346Y	F	346	Y	2	0.0529	0.0562	3	-0.000999001	15.9994	-4.1	0.000999001	15.9994	4.1				0	1	FALSE	FALSE	-1	-1	-1	-1	-1	-1
Alpha	N	N_F363L	F	363	L	1	0.7268	0.7268	0	0	-34.0162	1	0	34.0162	1				663	59	FALSE	FALSE	-1	-1	-1	-1	-1	-1
Alpha	N	N_F363V	F	363	V	1	0.0918	0.0918	-1	-0.0261132	-48.0428	1.4	0.0261132	48.0428	1.4				26	10	FALSE	FALSE	-1	-1	-1	-1	-1	-1
Alpha	N	N_F403L	F	403	L	1	0.0331	0.0331	0	0	-34.0162	1	0	34.0162	1				1	1	FALSE	FALSE	-1	-1	-1	-1	-1	-1
Alpha	N	N_F66V	F	66	V	80	0.0501	0.1008	-1	-0.0261132	-48.0428	1.4	0.0261132	48.0428	1.4				2	0	FALSE	FALSE	0.499625	0	0	-1	-1	-1
Alpha	N	N_G116V	G	116	V	2	0.0488	0.0588	-3	-0.0261132	42.0797	4.6	0.0261132	42.0797	4.6				3	1	FALSE	FALSE	-1	-1	-1	-1	-1	-1
Alpha	N	N_G120D	G	120	D	1	0.0313	0.0313	-1	-0.995698	58.0361	-3.1	0.995698	58.0361	3.1				22	4	FALSE	FALSE	-1	-1	-1	-1	-1	-1
Alpha	N	N_G120E	G	120	E	2	0.09695	0.1142	-2	-0.918037	72.0627	-3.1	0.918037	72.0627	3.1				542	18	FALSE	FALSE	-1	-1	-1	-1	-1	-1
Alpha	N	N_G124V	G	124	V	1	0.0433	0.0433	-3	-0.0261132	42.0797	4.6	0.0261132	42.0797	4.6				8	2	FALSE	FALSE	-1	-1	-1	-1	-1	-1
Alpha	N	N_G137E	G	137	E	1	0.4485	0.4485	-2	-0.918037	72.0627	-3.1	0.918037	72.0627	3.1				76	13	FALSE	FALSE	-1	-1	-1	-1	-1	-1
Alpha	N	N_G137R	G	137	R	1	0.0645	0.0645	-2	0.99999	99.1344	-4.1	0.99999	99.1344	4.1				391	56	FALSE	FALSE	-1	-1	-1	-1	-1	-1
Alpha	N	N_G137V	G	137	V	1	0.0417	0.0417	-3	-0.0261132	42.0797	4.6	0.0261132	42.0797	4.6				233	18	FALSE	FALSE	-1	-1	-1	-1	-1	-1
Alpha	N	N_G175A	G	175	A	1	0.0354	0.0354	0	0.035773	14.0266	2.2	0.035773	14.0266	2.2				1	0	FALSE	FALSE	-1	-1	-1	-1	-1	-1
Alpha	N	N_G178S	G	178	S	1	0.0994	0.0994	0	-0.299955	30.026	-0.4	0.299955	30.026	0.4				523	51	FALSE	FALSE	-1	-1	-1	-1	-1	-1
Alpha	N	N_G179S	G	179	S	1	0.1311	0.1311	0	-0.299955	30.026	-0.4	0.299955	30.026	0.4				2296	93	FALSE	FALSE	-1	-1	-1	-1	-1	-1
Alpha	N	N_G18C	G	18	C	1	0.032	0.032	-3	-0.00990099	46.0916	2.9	0.00990099	46.0916	2.9				1871	146	FALSE	FALSE	-1	-1	-1	-1	-1	-1
Alpha	N	N_G18D	G	18	D	1	0.0413	0.0413	-1	-0.995698	58.0361	-3.1	0.995698	58.0361	3.1				124	5	FALSE	FALSE	-1	-1	-1	-1	-1	-1
Alpha	N	N_G18N	G	18	N	1	0.0773	0.0773	0	0	57.0513	-3.1	0	57.0513	3.1				4	2	FALSE	FALSE	-1	-1	-1	-1	-1	-1
Alpha	N	N_G18V	G	18	V	1	0.0331	0.0331	-3	-0.0261132	42.0797	4.6	0.0261132	42.0797	4.6				14198	247	FALSE	FALSE	-1	-1	-1	-1	-1	-1
Alpha	N	N_G19E	G	19	E	2	0.52675	0.9979	-2	-0.918037	72.0627	-3.1	0.918037	72.0627	3.1				1233	30	FALSE	FALSE	-1	-1	-1	-1	-1	-1
Alpha	N	N_G19L	G	19	L	1	0.0397	0.0397	-4	0	56.1063	4.2	0	56.1063	4.2				3	0	FALSE	FALSE	-1	-1	-1	-1	-1	-1
Alpha	N	N_G19R	G	19	R	2	0.86475	0.9957	-2	0.99999	99.1344	-4.1	0.99999	99.1344	4.1				653	197	FALSE	FALSE	-1	-1	-1	-1	-1	-1
Alpha	N	N_G19S	G	19	S	1	0.0347	0.0347	0	-0.299955	30.026	-0.4	0.299955	30.026	0.4				0	0	FALSE	FALSE	-1	-1	-1	-1	-1	-1
Alpha	N	N_G204L	G	204	L	1	0.986	0.986	-4	0	56.1063	4.2	0	56.1063	4.2				1073	1323	FALSE	FALSE	-1	-1	-1	1	3	1
Alpha	N	N_G212C	G	212	C	3	0.986	0.9972	-3	-0.00990099	46.0916	2.9	0.00990099	46.0916	2.9				1410	509	FALSE	FALSE	-1	-1	-1	-1	-1	-1
Alpha	N	N_G212D	G	212	D	1	0.0317	0.0317	-1	-0.995698	58.0361	-3.1	0.995698	58.0361	3.1				662	8	FALSE	FALSE	-1	-1	-1	-1	-1	-1
Alpha	N	N_G212L	G	212	L	1	0.0368	0.0368	-4	0	56.1063	4.2	0	56.1063	4.2				17	2	FALSE	FALSE	-1	-1	-1	-1	-1	-1
Alpha	N	N_G212N	G	212	N	1	0.0339	0.0339	0	0	57.0513	-3.1	0	57.0513	3.1				5	0	FALSE	FALSE	-1	-1	-1	-1	-1	-1
Alpha	N	N_G212S	G	212	S	2	0.06635	0.0752	0	-0.299955	30.026	-0.4	0.299955	30.026	0.4				1767	283	FALSE	FALSE	-1	-1	-1	-1	-1	-1
Alpha	N	N_G214S	G	214	S	1	0.0334	0.0334	0	-0.299955	30.026	-0.4	0.299955	30.026	0.4				717	71	FALSE	FALSE	-1	-1	-1	-1	-1	-1
Alpha	N	N_G215C	G	215	C	1	0.2223	0.2223	-3	-0.00990099	46.0916	2.9	0.00990099	46.0916	2.9				1090043	512	TRUE	TRUE	-1	-1	-1	-1	-1	-1
Alpha	N	N_G215P	G	215	P	1	0.0414	0.0414	-2	0.198427	40.0639	-1.2	0.198427	40.0639	1.2				0	0	FALSE	FALSE	-1	-1	-1	-1	-1	-1
Alpha	N	N_G215S	G	215	S	1	0.998	0.998	0	-0.299955	30.026	-0.4	0.299955	30.026	0.4				1492	558	FALSE	FALSE	-1	-1	-1	-1	-1	-1
Alpha	N	N_G236A	G	236	A	1	0.0563	0.0563	0	0.035773	14.0266	2.2	0.035773	14.0266	2.2				62	0	FALSE	FALSE	-1	-1	-1	-1	-1	-1
Alpha	N	N_G236R	G	236	R	1	0.0634	0.0634	-2	0.99999	99.1344	-4.1	0.99999	99.1344	4.1				24	0	FALSE	FALSE	-1	-1	-1	-1	-1	-1
Alpha	N	N_G236V	G	236	V	1	0.9945	0.9945	-3	-0.0261132	42.0797	4.6	0.0261132	42.0797	4.6				1508	177	FALSE	FALSE	-1	-1	-1	-1	-1	-1
Alpha	N	N_G238C	G	238	C	2	0.50955	0.9783	-3	-0.00990099	46.0916	2.9	0.00990099	46.0916	2.9				5107	949	FALSE	FALSE	-1	-1	-1	-1	-1	-1
Alpha	N	N_G238L	G	238	L	6	0.0559	0.1734	-4	0	56.1063	4.2	0	56.1063	4.2				1	0	FALSE	FALSE	0.921326	2	1	-1	-1	-1
Alpha	N	N_G238R	G	238	R	3	0.0317	0.0405	-2	0.99999	99.1344	-4.1	0.99999	99.1344	4.1				35	12	FALSE	FALSE	-1	-1	-1	-1	-1	-1
Alpha	N	N_G243C	G	243	C	1	0.6579	0.6579	-3	-0.00990099	46.0916	2.9	0.00990099	46.0916	2.9				4739	542	FALSE	FALSE	-1	-1	-1	-1	-1	-1
Alpha	N	N_G25C	G	25	C	3	0.4904	0.9967	-3	-0.00990099	46.0916	2.9	0.00990099	46.0916	2.9				1323	484	FALSE	FALSE	-1	-1	-1	-1	-1	-1
Alpha	N	N_G284E	G	284	E	1	0.0333	0.0333	-2	-0.918037	72.0627	-3.1	0.918037	72.0627	3.1				10	10	FALSE	FALSE	-1	-1	-1	-1	-1	-1
Alpha	N	N_G284R	G	284	R	1	0.0301	0.0301	-2	0.99999	99.1344	-4.1	0.99999	99.1344	4.1				37	14	FALSE	FALSE	-1	-1	-1	-1	-1	-1
Alpha	N	N_G287V	G	287	V	1	0.0444	0.0444	-3	-0.0261132	42.0797	4.6	0.0261132	42.0797	4.6				1	1	FALSE	FALSE	-1	-1	-1	-1	-1	-1
Alpha	N	N_G30R	G	30	R	1	0.0364	0.0364	-2	0.99999	99.1344	-4.1	0.99999	99.1344	4.1				243	1994	FALSE	FALSE	-1	-1	-1	1	6	1
Alpha	N	N_G30V	G	30	V	1	0.0516	0.0516	-3	-0.0261132	42.0797	4.6	0.0261132	42.0797	4.6				69	91	FALSE	FALSE	-1	-1	-1	-1	-1	-1
Alpha	N	N_G316L	G	316	L	1	0.0309	0.0309	-4	0	56.1063	4.2	0	56.1063	4.2				1	0	FALSE	FALSE	-1	-1	-1	-1	-1	-1
Alpha	N	N_G316R	G	316	R	1	0.0458	0.0458	-2	0.99999	99.1344	-4.1	0.99999	99.1344	4.1				12	4	FALSE	FALSE	-1	-1	-1	-1	-1	-1
Alpha	N	N_G321R	G	321	R	1	0.0469	0.0469	-2	0.99999	99.1344	-4.1	0.99999	99.1344	4.1				21	3	FALSE	FALSE	-1	-1	-1	-1	-1	-1
Alpha	N	N_G321V	G	321	V	1	0.0432	0.0432	-3	-0.0261132	42.0797	4.6	0.0261132	42.0797	4.6				182	56	FALSE	FALSE	-1	-1	-1	-1	-1	-1
Alpha	N	N_G328A	G	328	A	1	0.043	0.043	0	0.035773	14.0266	2.2	0.035773	14.0266	2.2				5	1	FALSE	FALSE	-1	-1	-1	-1	-1	-1
Alpha	N	N_G335V	G	335	V	1	0.0547	0.0547	-3	-0.0261132	42.0797	4.6	0.0261132	42.0797	4.6				4	0	FALSE	FALSE	-1	-1	-1	-1	-1	-1
Alpha	N	N_G34W	G	34	W	1	0.9906	0.9906	-2	0	129.159	-0.5	0	129.159	0.5				1697	973	FALSE	FALSE	-1	-1	-1	-1	-1	-1
Alpha	N	N_G44C	G	44	C	1	0.0344	0.0344	-3	-0.00990099	46.0916	2.9	0.00990099	46.0916	2.9				493	27	FALSE	FALSE	-1	-1	-1	-1	-1	-1
Alpha	N	N_G44R	G	44	R	1	0.0545	0.0545	-2	0.99999	99.1344	-4.1	0.99999	99.1344	4.1				5	1	FALSE	FALSE	-1	-1	-1	-1	-1	-1
Alpha	N	N_G44V	G	44	V	1	0.0445	0.0445	-3	-0.0261132	42.0797	4.6	0.0261132	42.0797	4.6				1127	79	FALSE	FALSE	-1	-1	-1	-1	-1	-1
Alpha	N	N_G5R	G	5	R	1	0.0574	0.0574	-2	0.99999	99.1344	-4.1	0.99999	99.1344	4.1				337	27	FALSE	FALSE	-1	-1	-1	-1	-1	-1
Alpha	N	N_G5V	G	5	V	2	0.53105	0.998	-3	-0.0261132	42.0797	4.6	0.0261132	42.0797	4.6				566	21	FALSE	FALSE	-1	-1	-1	-1	-1	-1
Alpha	N	N_G85N	G	85	N	1	0.0373	0.0373	0	0	57.0513	-3.1	0	57.0513	3.1				1	0	FALSE	FALSE	-1	-1	-1	-1	-1	-1
Alpha	N	N_G85S	G	85	S	2	0.0671	0.0785	0	-0.299955	30.026	-0.4	0.299955	30.026	0.4				10	2	FALSE	FALSE	-1	-1	-1	-1	-1	-1
Alpha	N	N_G96C	G	96	C	1	0.0508	0.0508	-3	-0.00990099	46.0916	2.9	0.00990099	46.0916	2.9				1290	43	FALSE	FALSE	-1	-1	-1	-1	-1	-1
Alpha	N	N_H145Y	H	145	Y	7	0.9981	1	2	-0.0881732	26.0339	1.9	0.0881732	26.0339	1.9				4533	2265	FALSE	FALSE	0.493471	0	0	0.92357	1	1
Alpha	N	N_H300Y	H	300	Y	5	0.0372	0.9891	2	-0.0881732	26.0339	1.9	0.0881732	26.0339	1.9				11282	883	FALSE	FALSE	-1	-1	-1	-1	-1	-1
Alpha	N	N_H356L	H	356	L	1	0.0321	0.0321	-3	-0.0871742	-23.9817	7	0.0871742	23.9817	7				0	0	FALSE	FALSE	-1	-1	-1	-1	-1	-1
Alpha	N	N_I157S	I	157	S	1	0.0496	0.0496	-2	-0.299955	-26.0803	-5.3	0.299955	26.0803	5.3				4	0	FALSE	FALSE	-1	-1	-1	-1	-1	-1
Alpha	N	N_I15L	I	15	L	1	0.0628	0.0628	2	0	0	-0.7	0	0	0.7				64	3	FALSE	FALSE	-1	-1	-1	-1	-1	-1
Alpha	N	N_I15M	I	15	M	1	0.0395	0.0395	1	-0.259747	18.0384	-2.6	0.259747	18.0384	2.6				2	2	FALSE	FALSE	-1	-1	-1	-1	-1	-1
Alpha	N	N_I15N	I	15	N	1	0.0837	0.0837	-3	0	0.945	-8	0	0.945	8				4	0	FALSE	FALSE	-1	-1	-1	-1	-1	-1
Alpha	N	N_I15S	I	15	S	1	0.114	0.114	-2	-0.299955	-26.0803	-5.3	0.299955	26.0803	5.3				5	1	FALSE	FALSE	-1	-1	-1	-1	-1	-1
Alpha	N	N_I15T	I	15	T	1	0.1093	0.1093	-1	-0.361905	-12.0537	-5.2	0.361905	12.0537	5.2				160	26	FALSE	FALSE	-1	-1	-1	-1	-1	-1
Alpha	N	N_I292L	I	292	L	3	0.0319	0.0356	2	0	0	-0.7	0	0	0.7				126	6	FALSE	FALSE	-1	-1	-1	-1	-1	-1
Alpha	N	N_I292T	I	292	T	2	0.03235	0.0338	-1	-0.361905	-12.0537	-5.2	0.361905	12.0537	5.2				969	4898	FALSE	FALSE	-1	-1	-1	0.953504	3	1
Alpha	N	N_I304F	I	304	F	2	0.0656	0.0997	0	0	34.0162	-1.7	0	34.0162	1.7				2	0	FALSE	FALSE	-1	-1	-1	-1	-1	-1
Alpha	N	N_I304R	I	304	R	1	0.0667	0.0667	-3	0.99999	43.0281	-9	0.99999	43.0281	9				14	5	FALSE	FALSE	-1	-1	-1	-1	-1	-1
Alpha	N	N_I320S	I	320	S	1	0.0402	0.0402	-2	-0.299955	-26.0803	-5.3	0.299955	26.0803	5.3				0	0	FALSE	FALSE	-1	-1	-1	-1	-1	-1
Alpha	N	N_K169N	K	169	N	8	0.04565	0.0926	0	-0.999001	-14.0697	0.4	0.999001	14.0697	0.4				31	1	FALSE	FALSE	0.412804	0	0	-1	-1	-1
Alpha	N	N_K237E	K	237	E	1	0.0613	0.0613	1	-1.91704	0.9417	0.4	1.91704	0.9417	0.4				18	7	FALSE	FALSE	-1	-1	-1	-1	-1	-1
Alpha	N	N_K237I	K	237	I	1	0.0491	0.0491	-3	-0.999001	-15.0147	8.4	0.999001	15.0147	8.4				83	8	FALSE	FALSE	-1	-1	-1	-1	-1	-1
Alpha	N	N_K237N	K	237	N	5	0.0437	0.0982	0	-0.999001	-14.0697	0.4	0.999001	14.0697	0.4				174	15	FALSE	FALSE	-1	-1	-1	-1	-1	-1
Alpha	N	N_K237R	K	237	R	1	0.9043	0.9043	2	0.000989001	28.0134	-0.6	0.000989001	28.0134	0.6				982	56	FALSE	FALSE	-1	-1	-1	-1	-1	-1
Alpha	N	N_K237T	K	237	T	2	0.03715	0.0429	-1	-1.36091	-27.0684	3.2	1.36091	27.0684	3.2				8	2	FALSE	FALSE	-1	-1	-1	-1	-1	-1
Alpha	N	N_K248L	K	248	L	1	0.0331	0.0331	-2	-0.999001	-15.0147	7.7	0.999001	15.0147	7.7				6	1	FALSE	FALSE	-1	-1	-1	-1	-1	-1
Alpha	N	N_K248N	K	248	N	4	0.0562	0.0762	0	-0.999001	-14.0697	0.4	0.999001	14.0697	0.4				362	38	FALSE	FALSE	-1	-1	-1	-1	-1	-1
Alpha	N	N_K248R	K	248	R	1	0.0449	0.0449	2	0.000989001	28.0134	-0.6	0.000989001	28.0134	0.6				325	29	FALSE	FALSE	-1	-1	-1	-1	-1	-1
Alpha	N	N_K249N	K	249	N	3	0.0593	0.0807	0	-0.999001	-14.0697	0.4	0.999001	14.0697	0.4				55	15	FALSE	FALSE	-1	-1	-1	-1	-1	-1
Alpha	N	N_K256N	K	256	N	4	0.0454	0.0695	0	-0.999001	-14.0697	0.4	0.999001	14.0697	0.4				383	22	FALSE	FALSE	-1	-1	-1	-1	-1	-1
Alpha	N	N_K256R	K	256	R	1	0.0979	0.0979	2	0.000989001	28.0134	-0.6	0.000989001	28.0134	0.6				1131	153	FALSE	FALSE	-1	-1	-1	-1	-1	-1
Alpha	N	N_K256T	K	256	T	1	0.0733	0.0733	-1	-1.36091	-27.0684	3.2	1.36091	27.0684	3.2				5	2	FALSE	FALSE	-1	-1	-1	-1	-1	-1
Alpha	N	N_K261Q	K	261	Q	1	0.1111	0.1111	1	-0.999001	-0.0431	0.4	0.999001	0.0431	0.4				1	0	FALSE	FALSE	-1	-1	-1	-1	-1	-1
Alpha	N	N_K266N	K	266	N	1	0.0333	0.0333	0	-0.999001	-14.0697	0.4	0.999001	14.0697	0.4				6	5	FALSE	FALSE	-1	-1	-1	-1	-1	-1
Alpha	N	N_K299C	K	299	C	2	0.0618	0.0619	-3	-1.0089	-25.0294	6.4	1.0089	25.0294	6.4				1	0	FALSE	FALSE	-1	-1	-1	-1	-1	-1
Alpha	N	N_K299Q	K	299	Q	2	0.0394	0.0485	1	-0.999001	-0.0431	0.4	0.999001	0.0431	0.4				10	3	FALSE	FALSE	-1	-1	-1	-1	-1	-1
Alpha	N	N_K299S	K	299	S	3	0.0357	0.0619	0	-1.29896	-41.095	3.1	1.29896	41.095	3.1				0	0	FALSE	FALSE	-1	-1	-1	-1	-1	-1
Alpha	N	N_K347E	K	347	E	1	0.1078	0.1078	1	-1.91704	0.9417	0.4	1.91704	0.9417	0.4				12	1	FALSE	FALSE	-1	-1	-1	-1	-1	-1
Alpha	N	N_K355E	K	355	E	1	0.0307	0.0307	1	-1.91704	0.9417	0.4	1.91704	0.9417	0.4				18	1	FALSE	FALSE	-1	-1	-1	-1	-1	-1
Alpha	N	N_K355Q	K	355	Q	1	0.0323	0.0323	1	-0.999001	-0.0431	0.4	0.999001	0.0431	0.4				2	0	FALSE	FALSE	-1	-1	-1	-1	-1	-1
Alpha	N	N_K370Q	K	370	Q	1	0.0331	0.0331	1	-0.999001	-0.0431	0.4	0.999001	0.0431	0.4				42	22	FALSE	FALSE	-1	-1	-1	-1	-1	-1
Alpha	N	N_K373E	K	373	E	1	0.0405	0.0405	1	-1.91704	0.9417	0.4	1.91704	0.9417	0.4				101	15	FALSE	FALSE	-1	-1	-1	-1	-1	-1
Alpha	N	N_K373N	K	373	N	1	1	1	0	-0.999001	-14.0697	0.4	0.999001	14.0697	0.4				8173	629	FALSE	FALSE	-1	-1	-1	-1	-1	-1
Alpha	N	N_K387N	K	387	N	2	0.04545	0.0536	0	-0.999001	-14.0697	0.4	0.999001	14.0697	0.4				454	92	FALSE	FALSE	-1	-1	-1	-1	-1	-1
Alpha	N	N_K387R	K	387	R	1	0.9956	0.9956	2	0.000989001	28.0134	-0.6	0.000989001	28.0134	0.6				2061	145	FALSE	FALSE	-1	-1	-1	-1	-1	-1
Alpha	N	N_K387T	K	387	T	3	0.1161	0.2388	-1	-1.36091	-27.0684	3.2	1.36091	27.0684	3.2				31	4	FALSE	FALSE	-1	-1	-1	-1	-1	-1
Alpha	N	N_K388H	K	388	H	1	0.0312	0.0312	-1	-0.911827	8.967	0.7	0.911827	8.967	0.7				0	0	FALSE	FALSE	-1	-1	-1	-1	-1	-1
Alpha	N	N_K388N	K	388	N	1	0.0391	0.0391	0	-0.999001	-14.0697	0.4	0.999001	14.0697	0.4				26	4	FALSE	FALSE	-1	-1	-1	-1	-1	-1
Alpha	N	N_K38N	K	38	N	1	0.9908	0.9908	0	-0.999001	-14.0697	0.4	0.999001	14.0697	0.4				1127	16	FALSE	FALSE	-1	-1	-1	-1	-1	-1
Alpha	N	N_L113Q	L	113	Q	1	0.0571	0.0571	-2	0	14.9716	-7.3	0	14.9716	7.3				12	0	FALSE	FALSE	-1	-1	-1	-1	-1	-1
Alpha	N	N_L139F	L	139	F	2	0.9548	0.9875	0	0	34.0162	-1	0	34.0162	1				8564	1019	FALSE	FALSE	-1	-1	-1	0.915056	1	1
Alpha	N	N_L159P	L	159	P	1	0.0579	0.0579	-3	0.198427	-16.0424	-5.4	0.198427	16.0424	5.4				8	1	FALSE	FALSE	-1	-1	-1	-1	-1	-1
Alpha	N	N_L161F	L	161	F	1	0.2247	0.2247	0	0	34.0162	-1	0	34.0162	1				5265	188	FALSE	FALSE	-1	-1	-1	-1	-1	-1
Alpha	N	N_L161Q	L	161	Q	1	0.0763	0.0763	-2	0	14.9716	-7.3	0	14.9716	7.3				0	0	FALSE	FALSE	-1	-1	-1	-1	-1	-1
Alpha	N	N_L167F	L	167	F	1	0.0308	0.0308	0	0	34.0162	-1	0	34.0162	1				1931	123	FALSE	FALSE	-1	-1	-1	-1	-1	-1
Alpha	N	N_L167R	L	167	R	4	0.05	0.3445	-2	0.99999	43.0281	-8.3	0.99999	43.0281	8.3				5	0	FALSE	FALSE	-1	-1	-1	-1	-1	-1
Alpha	N	N_L167S	L	167	S	2	0.0518	0.0616	-2	-0.299955	-26.0803	-4.6	0.299955	26.0803	4.6				48	11	FALSE	FALSE	-1	-1	-1	-1	-1	-1
Alpha	N	N_L219F	L	219	F	4	0.04195	0.0556	0	0	34.0162	-1	0	34.0162	1				18408	39	FALSE	FALSE	-1	-1	-1	-1	-1	-1
Alpha	N	N_L221F	L	221	F	46	0.0363	0.0693	0	0	34.0162	-1	0	34.0162	1				1301	49	FALSE	FALSE	0.260745	0	0	-1	-1	-1
Alpha	N	N_L222M	L	222	M	4	0.0383	0.0464	2	-0.259747	18.0384	-1.9	0.259747	18.0384	1.9				197	6	FALSE	FALSE	-1	-1	-1	-1	-1	-1
Alpha	N	N_L291P	L	291	P	2	0.0357	0.0405	-3	0.198427	-16.0424	-5.4	0.198427	16.0424	5.4				7	0	FALSE	FALSE	-1	-1	-1	-1	-1	-1
Alpha	N	N_L331W	L	331	W	1	0.0403	0.0403	-2	0	73.0523	-4.7	0	73.0523	4.7				0	0	FALSE	FALSE	-1	-1	-1	-1	-1	-1
Alpha	N	N_L352V	L	352	V	2	0.0391	0.0478	1	-0.0261132	-14.0266	0.4	0.0261132	14.0266	0.4				2	0	FALSE	FALSE	-1	-1	-1	-1	-1	-1
Alpha	N	N_L394F	L	394	F	1	0.9554	0.9554	0	0	34.0162	-1	0	34.0162	1				49	8	FALSE	FALSE	-1	-1	-1	-1	-1	-1
Alpha	N	N_L394H	L	394	H	1	0.0462	0.0462	-3	0.0871742	23.9817	-7	0.0871742	23.9817	7				2	1	FALSE	FALSE	-1	-1	-1	-1	-1	-1
Alpha	N	N_L400F	L	400	F	1	0.0765	0.0765	0	0	34.0162	-1	0	34.0162	1				90	8	FALSE	FALSE	-1	-1	-1	-1	-1	-1
Alpha	N	N_L45I	L	45	I	4	0.04125	0.0524	2	0	0	0.7	0	0	0.7				29	6	FALSE	FALSE	-1	-1	-1	-1	-1	-1
Alpha	N	N_L64F	L	64	F	4	0.08655	0.1106	0	0	34.0162	-1	0	34.0162	1				17	5	FALSE	FALSE	-1	-1	-1	-1	-1	-1
Alpha	N	N_L64T	L	64	T	2	0.0392	0.0405	-1	-0.361905	-12.0537	-4.5	0.361905	12.0537	4.5				6	0	FALSE	FALSE	-1	-1	-1	-1	-1	-1
Alpha	N	N_M101V	M	101	V	1	0.0361	0.0361	1	0.233634	-32.065	2.3	0.233634	32.065	2.3				124	7	FALSE	FALSE	-1	-1	-1	-1	-1	-1
Alpha	N	N_M1I	M	1	I	4	0.03635	0.0574	1	0.259747	-18.0384	2.6	0.259747	18.0384	2.6				0	1	FALSE	FALSE	-1	-1	-1	-1	-1	-1
Alpha	N	N_M1L	M	1	L	37	0.0503	0.127	2	0.259747	-18.0384	1.9	0.259747	18.0384	1.9				56	9	FALSE	FALSE	0.982868	3	1	-1	-1	-1
Alpha	N	N_M1V	M	1	V	1	0.0336	0.0336	1	0.233634	-32.065	2.3	0.233634	32.065	2.3				0	1	FALSE	FALSE	-1	-1	-1	-1	-1	-1
Alpha	N	N_M210I	M	210	I	7	0.7926	0.9945	1	0.259747	-18.0384	2.6	0.259747	18.0384	2.6				4361	2313	FALSE	FALSE	0.208138	0	0	0.934511	1	1
Alpha	N	N_M210T	M	210	T	1	0.0432	0.0432	-1	-0.102158	-30.0921	-2.6	0.102158	30.0921	2.6				1047	41	FALSE	FALSE	-1	-1	-1	-1	-1	-1
Alpha	N	N_M234I	M	234	I	86	0.9915	1	1	0.259747	-18.0384	2.6	0.259747	18.0384	2.6				23286	36904	FALSE	FALSE	0.469491	0	0	0.996665	16	1
Alpha	N	N_M322I	M	322	I	1	1	1	1	0.259747	-18.0384	2.6	0.259747	18.0384	2.6				3812	384	FALSE	FALSE	-1	-1	-1	-1	-1	-1
Alpha	N	N_M411I	M	411	I	1	0.0303	0.0303	1	0.259747	-18.0384	2.6	0.259747	18.0384	2.6				457	13	FALSE	FALSE	-1	-1	-1	-1	-1	-1
Alpha	N	N_N192K	N	192	K	1	0.9983	0.9983	0	0.999001	14.0697	-0.4	0.999001	14.0697	0.4				76	89	FALSE	FALSE	-1	-1	-1	-1	-1	-1
Alpha	N	N_N213K	N	213	K	1	0.0328	0.0328	0	0.999001	14.0697	-0.4	0.999001	14.0697	0.4				56	1	FALSE	FALSE	-1	-1	-1	-1	-1	-1
Alpha	N	N_N213T	N	213	T	1	0.9957	0.9957	0	-0.361905	-12.9987	2.8	0.361905	12.9987	2.8				163	1	FALSE	FALSE	-1	-1	-1	-1	-1	-1
Alpha	N	N_N213Y	N	213	Y	2	0.51135	0.9899	-2	-0.000999001	49.0706	2.2	0.000999001	49.0706	2.2				2048	85	FALSE	FALSE	-1	-1	-1	-1	-1	-1
Alpha	N	N_N269S	N	269	S	1	0.0339	0.0339	1	-0.299955	-27.0253	2.7	0.299955	27.0253	2.7				221	21	FALSE	FALSE	-1	-1	-1	-1	-1	-1
Alpha	N	N_N27D	N	27	D	1	0.0353	0.0353	1	-0.995698	0.9848	0	0.995698	0.9848	0				259	15	FALSE	FALSE	-1	-1	-1	-1	-1	-1
Alpha	N	N_N354T	N	354	T	2	0.04165	0.051	0	-0.361905	-12.9987	2.8	0.361905	12.9987	2.8				249	4	FALSE	FALSE	-1	-1	-1	-1	-1	-1
Alpha	N	N_N47G	N	47	G	1	0.0378	0.0378	0	0	-57.0513	3.1	0	57.0513	3.1				1	0	FALSE	FALSE	-1	-1	-1	-1	-1	-1
Alpha	N	N_N48Y	N	48	Y	1	0.0472	0.0472	-2	-0.000999001	49.0706	2.2	0.000999001	49.0706	2.2				142	1	FALSE	FALSE	-1	-1	-1	-1	-1	-1
Alpha	N	N_N4S	N	4	S	1	0.0402	0.0402	1	-0.299955	-27.0253	2.7	0.299955	27.0253	2.7				449	2	FALSE	FALSE	-1	-1	-1	-1	-1	-1
Alpha	N	N_N8D	N	8	D	1	0.99	0.99	1	-0.995698	0.9848	0	0.995698	0.9848	0				2800	36	FALSE	FALSE	-1	-1	-1	-1	-1	-1
Alpha	N	N_N8I	N	8	I	1	0.9917	0.9917	-3	0	-0.945	8	0	0.945	8				76	95	FALSE	FALSE	-1	-1	-1	-1	-1	-1
Alpha	N	N_P106L	P	106	L	1	0.0301	0.0301	-3	-0.198427	16.0424	5.4	0.198427	16.0424	5.4				7	0	FALSE	FALSE	-1	-1	-1	-1	-1	-1
Alpha	N	N_P117T	P	117	T	1	0.0594	0.0594	-1	-0.560332	3.9887	0.9	0.560332	3.9887	0.9				16	2	FALSE	FALSE	-1	-1	-1	-1	-1	-1
Alpha	N	N_P13H	P	13	H	1	0.0341	0.0341	-2	-0.111253	40.0241	-1.6	0.111253	40.0241	1.6				122	21	FALSE	FALSE	-1	-1	-1	-1	-1	-1
Alpha	N	N_P13L	P	13	L	16	0.99655	1	-3	-0.198427	16.0424	5.4	0.198427	16.0424	5.4				3943129	4540	TRUE	TRUE	0.525834	0	0	0.952044	1	1
Alpha	N	N_P13T	P	13	T	2	0.96875	1	-1	-0.560332	3.9887	0.9	0.560332	3.9887	0.9				744	1372	FALSE	FALSE	-1	-1	-1	0.80317	0	0
Alpha	N	N_P142S	P	142	S	2	0.53465	0.9945	-1	-0.498382	-10.0379	0.8	0.498382	10.0379	0.8				6815	580	FALSE	FALSE	-1	-1	-1	-1	-1	-1
Alpha	N	N_P151L	P	151	L	1	0.0596	0.0596	-3	-0.198427	16.0424	5.4	0.198427	16.0424	5.4				5975	8722	FALSE	FALSE	-1	-1	-1	0.996076	8	1
Alpha	N	N_P162R	P	162	R	1	0.0577	0.0577	-2	0.801563	59.0705	-2.9	0.801563	59.0705	2.9				15	1	FALSE	FALSE	-1	-1	-1	-1	-1	-1
Alpha	N	N_P162T	P	162	T	1	0.0391	0.0391	-1	-0.560332	3.9887	0.9	0.560332	3.9887	0.9				46	1	FALSE	FALSE	-1	-1	-1	-1	-1	-1
Alpha	N	N_P168A	P	168	A	1	0.0594	0.0594	-1	-0.162654	-26.0373	3.4	0.162654	26.0373	3.4				41	1	FALSE	FALSE	-1	-1	-1	-1	-1	-1
Alpha	N	N_P168L	P	168	L	1	0.0657	0.0657	-3	-0.198427	16.0424	5.4	0.198427	16.0424	5.4				206	41	FALSE	FALSE	-1	-1	-1	-1	-1	-1
Alpha	N	N_P168S	P	168	S	2	0.5112	0.9845	-1	-0.498382	-10.0379	0.8	0.498382	10.0379	0.8				3183	568	FALSE	FALSE	-1	-1	-1	-1	-1	-1
Alpha	N	N_P199R	P	199	R	1	0.9907	0.9907	-2	0.801563	59.0705	-2.9	0.801563	59.0705	2.9				16	1	FALSE	FALSE	-1	-1	-1	-1	-1	-1
Alpha	N	N_P207L	P	207	L	9	0.9989	1	-3	-0.198427	16.0424	5.4	0.198427	16.0424	5.4				899	2058	FALSE	FALSE	0.841973	0	0	0.968456	4	1
Alpha	N	N_P207S	P	207	S	3	0.9729	0.9991	-1	-0.498382	-10.0379	0.8	0.498382	10.0379	0.8				2986	1987	FALSE	FALSE	-1	-1	-1	0.956438	4	1
Alpha	N	N_P207T	P	207	T	1	0.0435	0.0435	-1	-0.560332	3.9887	0.9	0.560332	3.9887	0.9				59	340	FALSE	FALSE	-1	-1	-1	-1	-1	-1
Alpha	N	N_P20A	P	20	A	1	0.0481	0.0481	-1	-0.162654	-26.0373	3.4	0.162654	26.0373	3.4				0	1	FALSE	FALSE	-1	-1	-1	-1	-1	-1
Alpha	N	N_P20S	P	20	S	3	0.991	1	-1	-0.498382	-10.0379	0.8	0.498382	10.0379	0.8				1073	121	FALSE	FALSE	-1	-1	-1	-1	-1	-1
Alpha	N	N_P258L	P	258	L	1	0.9329	0.9329	-3	-0.198427	16.0424	5.4	0.198427	16.0424	5.4				473	36	FALSE	FALSE	-1	-1	-1	-1	-1	-1
Alpha	N	N_P279L	P	279	L	1	0.9924	0.9924	-3	-0.198427	16.0424	5.4	0.198427	16.0424	5.4				983	59	FALSE	FALSE	-1	-1	-1	-1	-1	-1
Alpha	N	N_P279Q	P	279	Q	1	0.9859	0.9859	-1	-0.198427	31.014	-1.9	0.198427	31.014	1.9				2801	130	FALSE	FALSE	-1	-1	-1	-1	-1	-1
Alpha	N	N_P302H	P	302	H	1	0.0661	0.0661	-2	-0.111253	40.0241	-1.6	0.111253	40.0241	1.6				0	0	FALSE	FALSE	-1	-1	-1	-1	-1	-1
Alpha	N	N_P302L	P	302	L	8	0.07555	0.2561	-3	-0.198427	16.0424	5.4	0.198427	16.0424	5.4				0	4	FALSE	FALSE	0.81883	0	0	-1	-1	-1
Alpha	N	N_P326S	P	326	S	2	0.98355	0.9954	-1	-0.498382	-10.0379	0.8	0.498382	10.0379	0.8				4733	408	FALSE	FALSE	-1	-1	-1	-1	-1	-1
Alpha	N	N_P344Q	P	344	Q	2	0.0516	0.0528	-1	-0.198427	31.014	-1.9	0.198427	31.014	1.9				182	5	FALSE	FALSE	-1	-1	-1	-1	-1	-1
Alpha	N	N_P364L	P	364	L	5	0.7274	0.9892	-3	-0.198427	16.0424	5.4	0.198427	16.0424	5.4				2861	2763	FALSE	FALSE	-1	-1	-1	0.927263	3	1
Alpha	N	N_P364Q	P	364	Q	1	0.1554	0.1554	-1	-0.198427	31.014	-1.9	0.198427	31.014	1.9				110	8	FALSE	FALSE	-1	-1	-1	-1	-1	-1
Alpha	N	N_P364S	P	364	S	7	0.6739	0.8968	-1	-0.498382	-10.0379	0.8	0.498382	10.0379	0.8				1331	854	FALSE	FALSE	0.250077	0	0	-1	-1	-1
Alpha	N	N_P365L	P	365	L	3	0.3546	0.6677	-3	-0.198427	16.0424	5.4	0.198427	16.0424	5.4				8193	388	FALSE	FALSE	-1	-1	-1	-1	-1	-1
Alpha	N	N_P365S	P	365	S	4	0.76295	0.893	-1	-0.498382	-10.0379	0.8	0.498382	10.0379	0.8				5615	9246	FALSE	FALSE	-1	-1	-1	0.967234	3	1
Alpha	N	N_P365T	P	365	T	2	0.03355	0.0345	-1	-0.560332	3.9887	0.9	0.560332	3.9887	0.9				199	19	FALSE	FALSE	-1	-1	-1	-1	-1	-1
Alpha	N	N_P368A	P	368	A	3	0.0476	0.0495	-1	-0.162654	-26.0373	3.4	0.162654	26.0373	3.4				43	22	FALSE	FALSE	-1	-1	-1	-1	-1	-1
Alpha	N	N_P368H	P	368	H	1	0.0317	0.0317	-2	-0.111253	40.0241	-1.6	0.111253	40.0241	1.6				170	17	FALSE	FALSE	-1	-1	-1	-1	-1	-1
Alpha	N	N_P368S	P	368	S	9	0.0602	0.3764	-1	-0.498382	-10.0379	0.8	0.498382	10.0379	0.8				1744	276	FALSE	FALSE	0.81883	0	0	-1	-1	-1
Alpha	N	N_P383L	P	383	L	4	0.99455	1	-3	-0.198427	16.0424	5.4	0.198427	16.0424	5.4				8144	1768	FALSE	FALSE	-1	-1	-1	0.681774	0	0
Alpha	N	N_P383S	P	383	S	1	1	1	-1	-0.498382	-10.0379	0.8	0.498382	10.0379	0.8				6461	1119	FALSE	FALSE	-1	-1	-1	0.634351	0	0
Alpha	N	N_P42H	P	42	H	1	0.0467	0.0467	-2	-0.111253	40.0241	-1.6	0.111253	40.0241	1.6				1	0	FALSE	FALSE	-1	-1	-1	-1	-1	-1
Alpha	N	N_P46S	P	46	S	1	0.0424	0.0424	-1	-0.498382	-10.0379	0.8	0.498382	10.0379	0.8				2841	197	FALSE	FALSE	-1	-1	-1	-1	-1	-1
Alpha	N	N_P67S	P	67	S	219	0.9976	1	-1	-0.498382	-10.0379	0.8	0.498382	10.0379	0.8				12170	55568	FALSE	FALSE	0.798647	0	0	0.988076	15	1
Alpha	N	N_P67T	P	67	T	1	0.0774	0.0774	-1	-0.560332	3.9887	0.9	0.560332	3.9887	0.9				198	32	FALSE	FALSE	-1	-1	-1	-1	-1	-1
Alpha	N	N_P6L	P	6	L	1	0.9988	0.9988	-3	-0.198427	16.0424	5.4	0.198427	16.0424	5.4				4403	446	FALSE	FALSE	-1	-1	-1	-1	-1	-1
Alpha	N	N_P6S	P	6	S	2	0.51735	0.9803	-1	-0.498382	-10.0379	0.8	0.498382	10.0379	0.8				1045	55	FALSE	FALSE	-1	-1	-1	-1	-1	-1
Alpha	N	N_P6T	P	6	T	1	0.0352	0.0352	-1	-0.560332	3.9887	0.9	0.560332	3.9887	0.9				2061	48	FALSE	FALSE	-1	-1	-1	-1	-1	-1
Alpha	N	N_P73L	P	73	L	1	0.048	0.048	-3	-0.198427	16.0424	5.4	0.198427	16.0424	5.4				28	1	FALSE	FALSE	-1	-1	-1	-1	-1	-1
Alpha	N	N_P80L	P	80	L	1	1	1	-3	-0.198427	16.0424	5.4	0.198427	16.0424	5.4				381	115	FALSE	FALSE	-1	-1	-1	-1	-1	-1
Alpha	N	N_P80R	P	80	R	4	0.99915	0.9993	-2	0.801563	59.0705	-2.9	0.801563	59.0705	2.9				55327	181	FALSE	FALSE	-1	-1	-1	-1	-1	-1
Alpha	N	N_Q239H	Q	239	H	5	0.0654	0.4566	0	0.0871742	9.0101	0.3	0.0871742	9.0101	0.3				412	22	FALSE	FALSE	-1	-1	-1	-1	-1	-1
Alpha	N	N_Q240E	Q	240	E	3	0.0476	0.098	2	-0.918037	0.9848	0	0.918037	0.9848	0				68	3	FALSE	FALSE	-1	-1	-1	-1	-1	-1
Alpha	N	N_Q240H	Q	240	H	1	0.0592	0.0592	0	0.0871742	9.0101	0.3	0.0871742	9.0101	0.3				89	5	FALSE	FALSE	-1	-1	-1	-1	-1	-1
Alpha	N	N_Q241H	Q	241	H	1	0.0303	0.0303	0	0.0871742	9.0101	0.3	0.0871742	9.0101	0.3				151	10	FALSE	FALSE	-1	-1	-1	-1	-1	-1
Alpha	N	N_Q242H	Q	242	H	1	0.0766	0.0766	0	0.0871742	9.0101	0.3	0.0871742	9.0101	0.3				329	13	FALSE	FALSE	-1	-1	-1	-1	-1	-1
Alpha	N	N_Q242R	Q	242	R	2	0.65085	0.7222	1	0.99999	28.0565	-1	0.99999	28.0565	1				360	215	FALSE	FALSE	-1	-1	-1	-1	-1	-1
Alpha	N	N_Q244K	Q	244	K	3	0.0391	0.0526	1	0.999001	0.0431	-0.4	0.999001	0.0431	0.4				378	54	FALSE	FALSE	-1	-1	-1	-1	-1	-1
Alpha	N	N_Q244R	Q	244	R	1	0.0483	0.0483	1	0.99999	28.0565	-1	0.99999	28.0565	1				211	8	FALSE	FALSE	-1	-1	-1	-1	-1	-1
Alpha	N	N_Q272H	Q	272	H	1	0.0688	0.0688	0	0.0871742	9.0101	0.3	0.0871742	9.0101	0.3				55	17	FALSE	FALSE	-1	-1	-1	-1	-1	-1
Alpha	N	N_Q272I	Q	272	I	1	0.1624	0.1624	-3	0	-14.9716	8	0	14.9716	8				0	0	FALSE	FALSE	-1	-1	-1	-1	-1	-1
Alpha	N	N_Q272L	Q	272	L	1	0.094	0.094	-2	0	-14.9716	7.3	0	14.9716	7.3				279	6	FALSE	FALSE	-1	-1	-1	-1	-1	-1
Alpha	N	N_Q281L	Q	281	L	1	0.9962	0.9962	-2	0	-14.9716	7.3	0	14.9716	7.3				677	47	FALSE	FALSE	-1	-1	-1	-1	-1	-1
Alpha	N	N_Q283H	Q	283	H	1	0.0306	0.0306	0	0.0871742	9.0101	0.3	0.0871742	9.0101	0.3				99	4	FALSE	FALSE	-1	-1	-1	-1	-1	-1
Alpha	N	N_Q283P	Q	283	P	7	0.0312	0.0383	-1	0.198427	-31.014	1.9	0.198427	31.014	1.9				30	12	FALSE	FALSE	0.336982	0	0	-1	-1	-1
Alpha	N	N_Q289H	Q	289	H	3	0.9933	0.9946	0	0.0871742	9.0101	0.3	0.0871742	9.0101	0.3				5473	527	FALSE	FALSE	-1	-1	-1	-1	-1	-1
Alpha	N	N_Q28H	Q	28	H	1	0.9907	0.9907	0	0.0871742	9.0101	0.3	0.0871742	9.0101	0.3				874	165	FALSE	FALSE	-1	-1	-1	-1	-1	-1
Alpha	N	N_Q303L	Q	303	L	4	0.05525	0.1616	-2	0	-14.9716	7.3	0	14.9716	7.3				141	3	FALSE	FALSE	-1	-1	-1	-1	-1	-1
Alpha	N	N_Q349H	Q	349	H	1	0.0503	0.0503	0	0.0871742	9.0101	0.3	0.0871742	9.0101	0.3				135	14	FALSE	FALSE	-1	-1	-1	-1	-1	-1
Alpha	N	N_Q349L	Q	349	L	1	0.0324	0.0324	-2	0	-14.9716	7.3	0	14.9716	7.3				159	26	FALSE	FALSE	-1	-1	-1	-1	-1	-1
Alpha	N	N_Q349Y	Q	349	Y	1	0.0316	0.0316	-1	-0.000999001	35.044	2.2	0.000999001	35.044	2.2				1	0	FALSE	FALSE	-1	-1	-1	-1	-1	-1
Alpha	N	N_Q380R	Q	380	R	1	0.8266	0.8266	1	0.99999	28.0565	-1	0.99999	28.0565	1				271	19	FALSE	FALSE	-1	-1	-1	-1	-1	-1
Alpha	N	N_Q384H	Q	384	H	1	0.1398	0.1398	0	0.0871742	9.0101	0.3	0.0871742	9.0101	0.3				1341	684	FALSE	FALSE	-1	-1	-1	-1	-1	-1
Alpha	N	N_Q384R	Q	384	R	1	1	1	1	0.99999	28.0565	-1	0.99999	28.0565	1				52	17	FALSE	FALSE	-1	-1	-1	-1	-1	-1
Alpha	N	N_Q386H	Q	386	H	2	0.0948	0.1164	0	0.0871742	9.0101	0.3	0.0871742	9.0101	0.3				663	49	FALSE	FALSE	-1	-1	-1	-1	-1	-1
Alpha	N	N_Q386L	Q	386	L	2	0.04505	0.0462	-2	0	-14.9716	7.3	0	14.9716	7.3				107	42	FALSE	FALSE	-1	-1	-1	-1	-1	-1
Alpha	N	N_Q386R	Q	386	R	1	0.0342	0.0342	1	0.99999	28.0565	-1	0.99999	28.0565	1				213	59	FALSE	FALSE	-1	-1	-1	-1	-1	-1
Alpha	N	N_Q386Y	Q	386	Y	2	0.0539	0.0753	-1	-0.000999001	35.044	2.2	0.000999001	35.044	2.2				2	0	FALSE	FALSE	-1	-1	-1	-1	-1	-1
Alpha	N	N_Q389H	Q	389	H	3	0.9949	0.9988	0	0.0871742	9.0101	0.3	0.0871742	9.0101	0.3				4096	564	FALSE	FALSE	-1	-1	-1	-1	-1	-1
Alpha	N	N_Q389L	Q	389	L	12	0.9973	1	-2	0	-14.9716	7.3	0	14.9716	7.3				259	2945	FALSE	FALSE	0.772849	0	0	0.990694	12	1
Alpha	N	N_Q390H	Q	390	H	3	0.1456	0.1941	0	0.0871742	9.0101	0.3	0.0871742	9.0101	0.3				210	23	FALSE	FALSE	-1	-1	-1	-1	-1	-1
Alpha	N	N_Q39H	Q	39	H	1	0.0346	0.0346	0	0.0871742	9.0101	0.3	0.0871742	9.0101	0.3				174	6	FALSE	FALSE	-1	-1	-1	-1	-1	-1
Alpha	N	N_Q409L	Q	409	L	1	0.8353	0.8353	-2	0	-14.9716	7.3	0	14.9716	7.3				591	186	FALSE	FALSE	-1	-1	-1	-1	-1	-1
Alpha	N	N_Q418D	Q	418	D	3	0.0741	0.3245	0	-0.995698	-13.0418	0	0.995698	13.0418	0				0	0	FALSE	FALSE	-1	-1	-1	-1	-1	-1
Alpha	N	N_Q418H	Q	418	H	13	0.9967	1	0	0.0871742	9.0101	0.3	0.0871742	9.0101	0.3				5974	390	FALSE	FALSE	0.850274	0	0	-1	-1	-1
Alpha	N	N_Q70R	Q	70	R	1	1	1	1	0.99999	28.0565	-1	0.99999	28.0565	1				341	177	FALSE	FALSE	-1	-1	-1	-1	-1	-1
Alpha	N	N_Q7K	Q	7	K	2	0.52745	0.9858	1	0.999001	0.0431	-0.4	0.999001	0.0431	0.4				2286	1897	FALSE	FALSE	-1	-1	-1	0.87543	0	0
Alpha	N	N_Q9H	Q	9	H	10	0.9976	1	0	0.0871742	9.0101	0.3	0.0871742	9.0101	0.3				4183	3690	FALSE	FALSE	0.841973	0	0	0.882713	0	0
Alpha	N	N_Q9L	Q	9	L	1	0.0356	0.0356	-2	0	-14.9716	7.3	0	14.9716	7.3				81076	60	FALSE	FALSE	-1	-1	-1	-1	-1	-1
Alpha	N	N_R10Q	R	10	Q	1	0.0309	0.0309	1	-0.99999	-28.0565	1	0.99999	28.0565	1				1526	19	FALSE	FALSE	-1	-1	-1	-1	-1	-1
Alpha	N	N_R14L	R	14	L	1	0.9913	0.9913	-2	-0.99999	-43.0281	8.3	0.99999	43.0281	8.3				737	165	FALSE	FALSE	-1	-1	-1	-1	-1	-1
Alpha	N	N_R185C	R	185	C	1	0.155	0.155	-3	-1.00989	-53.0428	7	1.00989	53.0428	7				887	317	FALSE	FALSE	-1	-1	-1	-1	-1	-1
Alpha	N	N_R185L	R	185	L	1	0.0424	0.0424	-2	-0.99999	-43.0281	8.3	0.99999	43.0281	8.3				247	64	FALSE	FALSE	-1	-1	-1	-1	-1	-1
Alpha	N	N_R189C	R	189	C	6	0.0885	0.2849	-3	-1.00989	-53.0428	7	1.00989	53.0428	7				421	6	FALSE	FALSE	0.938866	1	1	-1	-1	-1
Alpha	N	N_R195I	R	195	I	1	0.9966	0.9966	-3	-0.99999	-43.0281	9	0.99999	43.0281	9				2961	1144	FALSE	FALSE	-1	-1	-1	0.495859	0	0
Alpha	N	N_R195K	R	195	K	1	1	1	2	-0.000989001	-28.0134	0.6	0.000989001	28.0134	0.6				993	830	FALSE	FALSE	-1	-1	-1	-1	-1	-1
Alpha	N	N_R203M	R	203	M	1	0.2723	0.2723	-1	-1.25974	-24.9897	6.4	1.25974	24.9897	6.4				1233437	832	TRUE	TRUE	-1	-1	-1	-1	-1	-1
Alpha	N	N_R203S	R	203	S	1	0.9907	0.9907	-1	-1.29995	-69.1084	3.7	1.29995	69.1084	3.7				41	124	FALSE	FALSE	-1	-1	-1	-1	-1	-1
Alpha	N	N_R209G	R	209	G	1	0.0432	0.0432	-2	-0.99999	-99.1344	4.1	0.99999	99.1344	4.1				95	27	FALSE	FALSE	-1	-1	-1	-1	-1	-1
Alpha	N	N_R209I	R	209	I	15	0.9951	1	-3	-0.99999	-43.0281	9	0.99999	43.0281	9				2697	3030	FALSE	FALSE	0.571112	0	0	0.764324	0	0
Alpha	N	N_R209S	R	209	S	1	0.0394	0.0394	-1	-1.29995	-69.1084	3.7	1.29995	69.1084	3.7				193	85	FALSE	FALSE	-1	-1	-1	-1	-1	-1
Alpha	N	N_R259Q	R	259	Q	3	0.0396	0.072	1	-0.99999	-28.0565	1	0.99999	28.0565	1				57	5	FALSE	FALSE	-1	-1	-1	-1	-1	-1
Alpha	N	N_R262Q	R	262	Q	1	0.1261	0.1261	1	-0.99999	-28.0565	1	0.99999	28.0565	1				4	1	FALSE	FALSE	-1	-1	-1	-1	-1	-1
Alpha	N	N_R276K	R	276	K	1	1	1	2	-0.000989001	-28.0134	0.6	0.000989001	28.0134	0.6				270	6	FALSE	FALSE	-1	-1	-1	-1	-1	-1
Alpha	N	N_R293K	R	293	K	3	0.0336	0.0386	2	-0.000989001	-28.0134	0.6	0.000989001	28.0134	0.6				113	12	FALSE	FALSE	-1	-1	-1	-1	-1	-1
Alpha	N	N_R319S	R	319	S	1	0.035	0.035	-1	-1.29995	-69.1084	3.7	1.29995	69.1084	3.7				4	1	FALSE	FALSE	-1	-1	-1	-1	-1	-1
Alpha	N	N_R32C	R	32	C	4	0.84715	1	-3	-1.00989	-53.0428	7	1.00989	53.0428	7				2081	83	FALSE	FALSE	-1	-1	-1	-1	-1	-1
Alpha	N	N_R385I	R	385	I	1	0.9958	0.9958	-3	-0.99999	-43.0281	9	0.99999	43.0281	9				911	122	FALSE	FALSE	-1	-1	-1	-1	-1	-1
Alpha	N	N_R385K	R	385	K	1	0.0405	0.0405	2	-0.000989001	-28.0134	0.6	0.000989001	28.0134	0.6				8500	2654	FALSE	FALSE	-1	-1	-1	0.98642	11	1
Alpha	N	N_R385T	R	385	T	6	0.08205	0.1583	-1	-1.3619	-55.0818	3.8	1.3619	55.0818	3.8				67	20	FALSE	FALSE	0.594973	0	0	-1	-1	-1
Alpha	N	N_R40C	R	40	C	2	0.04	0.0476	-3	-1.00989	-53.0428	7	1.00989	53.0428	7				2329	464	FALSE	FALSE	-1	-1	-1	-1	-1	-1
Alpha	N	N_S105R	S	105	R	1	0.0396	0.0396	-1	1.29995	69.1084	-3.7	1.29995	69.1084	3.7				7	1	FALSE	FALSE	-1	-1	-1	-1	-1	-1
Alpha	N	N_S180T	S	180	T	1	0.108	0.108	1	-0.0619499	14.0266	0.1	0.0619499	14.0266	0.1				306	157	FALSE	FALSE	-1	-1	-1	-1	-1	-1
Alpha	N	N_S183Y	S	183	Y	2	0.99915	1	-2	0.298956	76.0959	-0.5	0.298956	76.0959	0.5				37	8093	FALSE	FALSE	-1	-1	-1	0.985971	5	1
Alpha	N	N_S184F	S	184	F	1	0.1582	0.1582	-2	0.299955	60.0965	3.6	0.299955	60.0965	3.6				38	19	FALSE	FALSE	-1	-1	-1	-1	-1	-1
Alpha	N	N_S187L	S	187	L	14	0.9944	1	-2	0.299955	26.0803	4.6	0.299955	26.0803	4.6				3431	2192	FALSE	FALSE	0.85227	0	0	0.743329	0	0
Alpha	N	N_S187T	S	187	T	6	0.0725	0.3082	1	-0.0619499	14.0266	0.1	0.0619499	14.0266	0.1				228	3	FALSE	FALSE	0.938866	1	1	-1	-1	-1
Alpha	N	N_S190I	S	190	I	5	0.9985	1	-2	0.299955	26.0803	5.3	0.299955	26.0803	5.3				124	4562	FALSE	FALSE	-1	-1	-1	0.873847	0	0
Alpha	N	N_S190R	S	190	R	2	0.9048	1	-1	1.29995	69.1084	-3.7	1.29995	69.1084	3.7				36	330	FALSE	FALSE	-1	-1	-1	-1	-1	-1
Alpha	N	N_S194A	S	194	A	1	0.9039	0.9039	1	0.335728	-15.9994	2.6	0.335728	15.9994	2.6				44	790	FALSE	FALSE	-1	-1	-1	-1	-1	-1
Alpha	N	N_S194L	S	194	L	90	0.991	1	-2	0.299955	26.0803	4.6	0.299955	26.0803	4.6				5450	58229	FALSE	FALSE	0.434738	0	0	0.981492	9	1
Alpha	N	N_S197L	S	197	L	3	0.9904	0.993	-2	0.299955	26.0803	4.6	0.299955	26.0803	4.6				2279	3394	FALSE	FALSE	-1	-1	-1	0.986363	2	1
Alpha	N	N_S201N	S	201	N	1	0.9984	0.9984	1	0.299955	27.0253	-2.7	0.299955	27.0253	2.7				906	80	FALSE	FALSE	-1	-1	-1	-1	-1	-1
Alpha	N	N_S202C	S	202	C	12	0.99555	0.998	-1	0.290054	16.0656	3.3	0.290054	16.0656	3.3				666	1033	FALSE	FALSE	0.853164	0	0	0.979052	5	1
Alpha	N	N_S202N	S	202	N	3	0.9764	0.9946	1	0.299955	27.0253	-2.7	0.299955	27.0253	2.7				415	2173	FALSE	FALSE	-1	-1	-1	0.902153	1	1
Alpha	N	N_S202R	S	202	R	8	0.96265	0.9959	-1	1.29995	69.1084	-3.7	1.29995	69.1084	3.7				4770	99	FALSE	FALSE	0.630676	0	0	-1	-1	-1
Alpha	N	N_S206F	S	206	F	20	0.99075	1	-2	0.299955	60.0965	3.6	0.299955	60.0965	3.6				769	2231	FALSE	FALSE	0.789293	0	0	0.961202	1	1
Alpha	N	N_S206Y	S	206	Y	1	0.0435	0.0435	-2	0.298956	76.0959	-0.5	0.298956	76.0959	0.5				61	6	FALSE	FALSE	-1	-1	-1	-1	-1	-1
Alpha	N	N_S232G	S	232	G	1	0.04	0.04	0	0.299955	-30.026	0.4	0.299955	30.026	0.4				4423	8	FALSE	FALSE	-1	-1	-1	-1	-1	-1
Alpha	N	N_S232I	S	232	I	1	0.9959	0.9959	-2	0.299955	26.0803	5.3	0.299955	26.0803	5.3				238	71	FALSE	FALSE	-1	-1	-1	-1	-1	-1
Alpha	N	N_S232R	S	232	R	1	0.3503	0.3503	-1	1.29995	69.1084	-3.7	1.29995	69.1084	3.7				325	32	FALSE	FALSE	-1	-1	-1	-1	-1	-1
Alpha	N	N_S23L	S	23	L	1	0.048	0.048	-2	0.299955	26.0803	4.6	0.299955	26.0803	4.6				436	39	FALSE	FALSE	-1	-1	-1	-1	-1	-1
Alpha	N	N_S23Y	S	23	Y	1	0.208	0.208	-2	0.298956	76.0959	-0.5	0.298956	76.0959	0.5				2	1	FALSE	FALSE	-1	-1	-1	-1	-1	-1
Alpha	N	N_S250A	S	250	A	1	0.0391	0.0391	1	0.335728	-15.9994	2.6	0.335728	15.9994	2.6				90	2	FALSE	FALSE	-1	-1	-1	-1	-1	-1
Alpha	N	N_S250P	S	250	P	1	0.0791	0.0791	-1	0.498382	10.0379	-0.8	0.498382	10.0379	0.8				113	20	FALSE	FALSE	-1	-1	-1	-1	-1	-1
Alpha	N	N_S2P	S	2	P	3	0.9992	1	-1	0.498382	10.0379	-0.8	0.498382	10.0379	0.8				111	992	FALSE	FALSE	-1	-1	-1	-1	-1	-1
Alpha	N	N_S2V	S	2	V	36	0.04865	0.1202	-2	0.273842	12.0537	5	0.273842	12.0537	5				0	0	FALSE	FALSE	0.982868	4	1	-1	-1	-1
Alpha	N	N_S2Y	S	2	Y	5	0.0379	0.9894	-2	0.298956	76.0959	-0.5	0.298956	76.0959	0.5				260	226	FALSE	FALSE	-1	-1	-1	-1	-1	-1
Alpha	N	N_S310C	S	310	C	1	0.9427	0.9427	-1	0.290054	16.0656	3.3	0.290054	16.0656	3.3				64	7	FALSE	FALSE	-1	-1	-1	-1	-1	-1
Alpha	N	N_S327L	S	327	L	6	0.9936	0.9978	-2	0.299955	26.0803	4.6	0.299955	26.0803	4.6				31400	749	FALSE	FALSE	0.313239	0	0	-1	-1	-1
Alpha	N	N_S37L	S	37	L	1	0.0314	0.0314	-2	0.299955	26.0803	4.6	0.299955	26.0803	4.6				186	99	FALSE	FALSE	-1	-1	-1	-1	-1	-1
Alpha	N	N_S37P	S	37	P	1	0.9954	0.9954	-1	0.498382	10.0379	-0.8	0.498382	10.0379	0.8				4758	297	FALSE	FALSE	-1	-1	-1	-1	-1	-1
Alpha	N	N_S404G	S	404	G	1	0.0331	0.0331	0	0.299955	-30.026	0.4	0.299955	30.026	0.4				1	0	FALSE	FALSE	-1	-1	-1	-1	-1	-1
Alpha	N	N_S410F	S	410	F	1	0.0674	0.0674	-2	0.299955	60.0965	3.6	0.299955	60.0965	3.6				40	25	FALSE	FALSE	-1	-1	-1	-1	-1	-1
Alpha	N	N_S412N	S	412	N	1	0.04	0.04	1	0.299955	27.0253	-2.7	0.299955	27.0253	2.7				1798	59	FALSE	FALSE	-1	-1	-1	-1	-1	-1
Alpha	N	N_S413I	S	413	I	2	0.5162	0.9807	-2	0.299955	26.0803	5.3	0.299955	26.0803	5.3				2981	716	FALSE	FALSE	-1	-1	-1	-1	-1	-1
Alpha	N	N_S413N	S	413	N	3	0.0434	0.0488	1	0.299955	27.0253	-2.7	0.299955	27.0253	2.7				103	19	FALSE	FALSE	-1	-1	-1	-1	-1	-1
Alpha	N	N_S416P	S	416	P	1	0.0306	0.0306	-1	0.498382	10.0379	-0.8	0.498382	10.0379	0.8				63	3	FALSE	FALSE	-1	-1	-1	-1	-1	-1
Alpha	N	N_S79I	S	79	I	1	0.0306	0.0306	-2	0.299955	26.0803	5.3	0.299955	26.0803	5.3				973	8	FALSE	FALSE	-1	-1	-1	-1	-1	-1
Alpha	N	N_S79N	S	79	N	1	0.9972	0.9972	1	0.299955	27.0253	-2.7	0.299955	27.0253	2.7				667	20	FALSE	FALSE	-1	-1	-1	-1	-1	-1
Alpha	N	N_T115S	T	115	S	1	0.0461	0.0461	1	0.0619499	-14.0266	-0.1	0.0619499	14.0266	0.1				1	0	FALSE	FALSE	-1	-1	-1	-1	-1	-1
Alpha	N	N_T135I	T	135	I	8	0.9976	0.9992	-1	0.361905	12.0537	5.2	0.361905	12.0537	5.2				18720	2440	FALSE	FALSE	0.540075	0	0	0.929051	1	1
Alpha	N	N_T16M	T	16	M	2	0.99955	0.9996	-1	0.102158	30.0921	2.6	0.102158	30.0921	2.6				1050	371	FALSE	FALSE	-1	-1	-1	-1	-1	-1
Alpha	N	N_T16S	T	16	S	1	0.0724	0.0724	1	0.0619499	-14.0266	-0.1	0.0619499	14.0266	0.1				484	4	FALSE	FALSE	-1	-1	-1	-1	-1	-1
Alpha	N	N_T205S	T	205	S	1	0.0308	0.0308	1	0.0619499	-14.0266	-0.1	0.0619499	14.0266	0.1				141	48	FALSE	FALSE	-1	-1	-1	-1	-1	-1
Alpha	N	N_T245I	T	245	I	1	0.9942	0.9942	-1	0.361905	12.0537	5.2	0.361905	12.0537	5.2				767	10	FALSE	FALSE	-1	-1	-1	-1	-1	-1
Alpha	N	N_T245P	T	245	P	1	0.0473	0.0473	-1	0.560332	-3.9887	-0.9	0.560332	3.9887	0.9				107	4	FALSE	FALSE	-1	-1	-1	-1	-1	-1
Alpha	N	N_T245S	T	245	S	1	0.0334	0.0334	1	0.0619499	-14.0266	-0.1	0.0619499	14.0266	0.1				11	4	FALSE	FALSE	-1	-1	-1	-1	-1	-1
Alpha	N	N_T247S	T	247	S	14	0.04465	0.087	1	0.0619499	-14.0266	-0.1	0.0619499	14.0266	0.1				387	16	FALSE	FALSE	0.455879	0	0	-1	-1	-1
Alpha	N	N_T24I	T	24	I	1	0.9984	0.9984	-1	0.361905	12.0537	5.2	0.361905	12.0537	5.2				7849	628	FALSE	FALSE	-1	-1	-1	-1	-1	-1
Alpha	N	N_T271I	T	271	I	2	0.0918	0.1058	-1	0.361905	12.0537	5.2	0.361905	12.0537	5.2				6213	562	FALSE	FALSE	-1	-1	-1	-1	-1	-1
Alpha	N	N_T282I	T	282	I	1	0.0858	0.0858	-1	0.361905	12.0537	5.2	0.361905	12.0537	5.2				2197	147	FALSE	FALSE	-1	-1	-1	-1	-1	-1
Alpha	N	N_T325A	T	325	A	1	0.9907	0.9907	0	0.397678	-30.026	2.5	0.397678	30.026	2.5				97	5	FALSE	FALSE	-1	-1	-1	-1	-1	-1
Alpha	N	N_T329P	T	329	P	6	0.03415	0.0429	-1	0.560332	-3.9887	-0.9	0.560332	3.9887	0.9				3	0	FALSE	FALSE	0.378935	0	0	-1	-1	-1
Alpha	N	N_T334I	T	334	I	4	0.9193	0.9983	-1	0.361905	12.0537	5.2	0.361905	12.0537	5.2				4938	1215	FALSE	FALSE	-1	-1	-1	0.599097	0	0
Alpha	N	N_T362A	T	362	A	3	0.9791	1	0	0.397678	-30.026	2.5	0.397678	30.026	2.5				226	11	FALSE	FALSE	-1	-1	-1	-1	-1	-1
Alpha	N	N_T362I	T	362	I	1	0.8388	0.8388	-1	0.361905	12.0537	5.2	0.361905	12.0537	5.2				19880	929	FALSE	FALSE	-1	-1	-1	-1	-1	-1
Alpha	N	N_T366I	T	366	I	4	0.7665	0.9962	-1	0.361905	12.0537	5.2	0.361905	12.0537	5.2				12768	904	FALSE	FALSE	-1	-1	-1	-1	-1	-1
Alpha	N	N_T379I	T	379	I	3	0.9993	1	-1	0.361905	12.0537	5.2	0.361905	12.0537	5.2				11707	1365	FALSE	FALSE	-1	-1	-1	0.809764	0	0
Alpha	N	N_T391I	T	391	I	23	0.9954	1	-1	0.361905	12.0537	5.2	0.361905	12.0537	5.2				4100	6107	FALSE	FALSE	0.664293	0	0	0.961023	3	1
Alpha	N	N_T417A	T	417	A	1	0.0431	0.0431	0	0.397678	-30.026	2.5	0.397678	30.026	2.5				138	16	FALSE	FALSE	-1	-1	-1	-1	-1	-1
Alpha	N	N_T417I	T	417	I	6	0.07255	0.9959	-1	0.361905	12.0537	5.2	0.361905	12.0537	5.2				2976	124	FALSE	FALSE	0.569472	0	0	-1	-1	-1
Alpha	N	N_T417S	T	417	S	2	0.03755	0.0421	1	0.0619499	-14.0266	-0.1	0.0619499	14.0266	0.1				18	1	FALSE	FALSE	-1	-1	-1	-1	-1	-1
Alpha	N	N_T417Y	T	417	Y	3	0.0504	0.1016	-2	0.360906	62.0693	-0.6	0.360906	62.0693	0.6				0	0	FALSE	FALSE	-1	-1	-1	-1	-1	-1
Alpha	N	N_T49A	T	49	A	1	0.0329	0.0329	0	0.397678	-30.026	2.5	0.397678	30.026	2.5				58	1	FALSE	FALSE	-1	-1	-1	-1	-1	-1
Alpha	N	N_T49I	T	49	I	1	0.9992	0.9992	-1	0.361905	12.0537	5.2	0.361905	12.0537	5.2				7063	87	FALSE	FALSE	-1	-1	-1	-1	-1	-1
Alpha	N	N_T91I	T	91	I	1	0.0376	0.0376	-1	0.361905	12.0537	5.2	0.361905	12.0537	5.2				54	5	FALSE	FALSE	-1	-1	-1	-1	-1	-1
Alpha	N	N_V270G	V	270	G	1	0.1	0.1	-3	0.0261132	-42.0797	-4.6	0.0261132	42.0797	4.6				1	0	FALSE	FALSE	-1	-1	-1	-1	-1	-1
Alpha	N	N_V350D	V	350	D	2	0.03945	0.0432	-3	-0.969585	15.9564	-7.7	0.969585	15.9564	7.7				0	1	FALSE	FALSE	-1	-1	-1	-1	-1	-1
Alpha	N	N_V350F	V	350	F	1	0.9951	0.9951	-1	0.0261132	48.0428	-1.4	0.0261132	48.0428	1.4				651	109	FALSE	FALSE	-1	-1	-1	-1	-1	-1
Alpha	N	N_V350L	V	350	L	1	0.0466	0.0466	1	0.0261132	14.0266	-0.4	0.0261132	14.0266	0.4				42	8	FALSE	FALSE	-1	-1	-1	-1	-1	-1
Alpha	N	N_V350M	V	350	M	1	0.0698	0.0698	1	-0.233634	32.065	-2.3	0.233634	32.065	2.3				0	0	FALSE	FALSE	-1	-1	-1	-1	-1	-1
Alpha	N	N_V350N	V	350	N	1	0.0982	0.0982	-3	0.0261132	14.9716	-7.7	0.0261132	14.9716	7.7				1	0	FALSE	FALSE	-1	-1	-1	-1	-1	-1
Alpha	N	N_V392L	V	392	L	3	0.0629	0.9971	1	0.0261132	14.0266	-0.4	0.0261132	14.0266	0.4				1131	168	FALSE	FALSE	-1	-1	-1	-1	-1	-1
Alpha	N	N_V72F	V	72	F	1	0.0417	0.0417	-1	0.0261132	48.0428	-1.4	0.0261132	48.0428	1.4				140	10	FALSE	FALSE	-1	-1	-1	-1	-1	-1
Alpha	N	N_W301L	W	301	L	1	0.1189	0.1189	-2	0	-73.0523	4.7	0	73.0523	4.7				92	39	FALSE	FALSE	-1	-1	-1	-1	-1	-1
Alpha	N	N_W301S	W	301	S	2	0.0861	0.1066	-3	-0.299955	-99.1326	0.1	0.299955	99.1326	0.1				0	2	FALSE	FALSE	-1	-1	-1	-1	-1	-1
Alpha	N	N_W330C	W	330	C	1	0.3405	0.3405	-2	-0.00990099	-83.067	3.4	0.00990099	83.067	3.4				55	8	FALSE	FALSE	-1	-1	-1	-1	-1	-1
Alpha	N	N_Y111N	Y	111	N	1	0.0571	0.0571	-2	0.000999001	-49.0706	-2.2	0.000999001	49.0706	2.2				1	0	FALSE	FALSE	-1	-1	-1	-1	-1	-1
Alpha	N	N_Y112H	Y	112	H	1	0.0342	0.0342	2	0.0881732	-26.0339	-1.9	0.0881732	26.0339	1.9				7	1	FALSE	FALSE	-1	-1	-1	-1	-1	-1
Alpha	N	N_Y112N	Y	112	N	1	0.0577	0.0577	-2	0.000999001	-49.0706	-2.2	0.000999001	49.0706	2.2				0	1	FALSE	FALSE	-1	-1	-1	-1	-1	-1
Alpha	N	N_Y172F	Y	172	F	1	0.6657	0.6657	3	0.000999001	-15.9994	4.1	0.000999001	15.9994	4.1				13	0	FALSE	FALSE	-1	-1	-1	-1	-1	-1
Alpha	N	N_Y298E	Y	298	E	2	0.0395	0.0485	-2	-0.917038	-34.0592	-2.2	0.917038	34.0592	2.2				1	0	FALSE	FALSE	-1	-1	-1	-1	-1	-1
Alpha	N	N_Y298F	Y	298	F	4	0.08775	0.1657	3	0.000999001	-15.9994	4.1	0.000999001	15.9994	4.1				27	1	FALSE	FALSE	-1	-1	-1	-1	-1	-1
Alpha	N	N_Y333S	Y	333	S	1	0.0322	0.0322	-2	-0.298956	-76.0959	0.5	0.298956	76.0959	0.5				2	0	FALSE	FALSE	-1	-1	-1	-1	-1	-1
Alpha	NS10	NS10_A28P	A	28	P	1	0.037	0.037	-1	0.162654	26.0373	-3.4	0.162654	26.0373	3.4				0	0	FALSE	FALSE	-1	-1	-1	-1	-1	-1
Alpha	NS10	NS10_A8V	A	8	V	5	0.8571	1	0	-0.0618862	28.0531	2.4	0.0618862	28.0531	2.4				0	0	FALSE	FALSE	-1	-1	-1	-1	-1	-1
Alpha	NS10	NS10_C19Y	C	19	Y	1	0.0334	0.0334	-2	0.00890199	60.0303	-3.8	0.00890199	60.0303	3.8				0	0	FALSE	FALSE	-1	-1	-1	-1	-1	-1
Alpha	NS10	NS10_D31N	D	31	N	1	0.0397	0.0397	1	0.995698	-0.9848	0	0.995698	0.9848	0				0	0	FALSE	FALSE	-1	-1	-1	-1	-1	-1
Alpha	NS10	NS10_F35E	F	35	E	92	0.0433	0.1	-3	-0.918037	-18.0598	-6.3	0.918037	18.0598	6.3				0	0	FALSE	FALSE	0.845446	0	0	-1	-1	-1
Alpha	NS10	NS10_F9S	F	9	S	2	0.99805	0.9987	-2	-0.299955	-60.0965	-3.6	0.299955	60.0965	3.6				0	0	FALSE	FALSE	-1	-1	-1	-1	-1	-1
Alpha	NS10	NS10_G2D	G	2	D	1	0.059	0.059	-1	-0.995698	58.0361	-3.1	0.995698	58.0361	3.1				0	0	FALSE	FALSE	-1	-1	-1	-1	-1	-1
Alpha	NS10	NS10_I13L	I	13	L	1	0.0632	0.0632	2	0	0	-0.7	0	0	0.7				0	0	FALSE	FALSE	-1	-1	-1	-1	-1	-1
Alpha	NS10	NS10_I13T	I	13	T	2	0.394	0.752	-1	-0.361905	-12.0537	-5.2	0.361905	12.0537	5.2				0	0	FALSE	FALSE	-1	-1	-1	-1	-1	-1
Alpha	NS10	NS10_I27R	I	27	R	1	0.0552	0.0552	-3	0.99999	43.0281	-9	0.99999	43.0281	9				0	0	FALSE	FALSE	-1	-1	-1	-1	-1	-1
Alpha	NS10	NS10_I27T	I	27	T	1	0.9769	0.9769	-1	-0.361905	-12.0537	-5.2	0.361905	12.0537	5.2				0	0	FALSE	FALSE	-1	-1	-1	-1	-1	-1
Alpha	NS10	NS10_I4K	I	4	K	1	0.0425	0.0425	-3	0.999001	15.0147	-8.4	0.999001	15.0147	8.4				0	0	FALSE	FALSE	-1	-1	-1	-1	-1	-1
Alpha	NS10	NS10_I4V	I	4	V	2	0.9994	1	3	-0.0261132	-14.0266	-0.3	0.0261132	14.0266	0.3				0	0	FALSE	FALSE	-1	-1	-1	-1	-1	-1
Alpha	NS10	NS10_L16I	L	16	I	1	0.2114	0.2114	2	0	0	0.7	0	0	0.7				0	0	FALSE	FALSE	-1	-1	-1	-1	-1	-1
Alpha	NS10	NS10_L17F	L	17	F	1	0.9991	0.9991	0	0	34.0162	-1	0	34.0162	1				0	0	FALSE	FALSE	-1	-1	-1	-1	-1	-1
Alpha	NS10	NS10_L37F	L	37	F	4	0.99525	1	0	0	34.0162	-1	0	34.0162	1				0	0	FALSE	FALSE	-1	-1	-1	-1	-1	-1
Alpha	NS10	NS10_L37P	L	37	P	1	0.0428	0.0428	-3	0.198427	-16.0424	-5.4	0.198427	16.0424	5.4				0	0	FALSE	FALSE	-1	-1	-1	-1	-1	-1
Alpha	NS10	NS10_L37V	L	37	V	1	0.0476	0.0476	1	-0.0261132	-14.0266	0.4	0.0261132	14.0266	0.4				0	0	FALSE	FALSE	-1	-1	-1	-1	-1	-1
Alpha	NS10	NS10_M1I	M	1	I	2	0.0947	0.1399	1	0.259747	-18.0384	2.6	0.259747	18.0384	2.6				0	0	FALSE	FALSE	-1	-1	-1	-1	-1	-1
Alpha	NS10	NS10_M1K	M	1	K	1	0.074	0.074	-1	1.25875	-3.0237	-5.8	1.25875	3.0237	5.8				0	0	FALSE	FALSE	-1	-1	-1	-1	-1	-1
Alpha	NS10	NS10_M21R	M	21	R	1	0.0377	0.0377	-1	1.25974	24.9897	-6.4	1.25974	24.9897	6.4				0	0	FALSE	FALSE	-1	-1	-1	-1	-1	-1
Alpha	NS10	NS10_M21V	M	21	V	1	0.9907	0.9907	1	0.233634	-32.065	2.3	0.233634	32.065	2.3				0	0	FALSE	FALSE	-1	-1	-1	-1	-1	-1
Alpha	NS10	NS10_N22I	N	22	I	1	0.9835	0.9835	-3	0	-0.945	8	0	0.945	8				0	0	FALSE	FALSE	-1	-1	-1	-1	-1	-1
Alpha	NS10	NS10_N25S	N	25	S	1	0.0446	0.0446	1	-0.299955	-27.0253	2.7	0.299955	27.0253	2.7				0	0	FALSE	FALSE	-1	-1	-1	-1	-1	-1
Alpha	NS10	NS10_N25T	N	25	T	1	0.0556	0.0556	0	-0.361905	-12.9987	2.8	0.361905	12.9987	2.8				0	0	FALSE	FALSE	-1	-1	-1	-1	-1	-1
Alpha	NS10	NS10_N36P	N	36	P	1	0.035	0.035	-2	0.198427	-16.9874	1.9	0.198427	16.9874	1.9				0	0	FALSE	FALSE	-1	-1	-1	-1	-1	-1
Alpha	NS10	NS10_P10L	P	10	L	4	0.9971	1	-3	-0.198427	16.0424	5.4	0.198427	16.0424	5.4				0	0	FALSE	FALSE	-1	-1	-1	-1	-1	-1
Alpha	NS10	NS10_P10S	P	10	S	5	0.9955	1	-1	-0.498382	-10.0379	0.8	0.498382	10.0379	0.8				0	0	FALSE	FALSE	-1	-1	-1	-1	-1	-1
Alpha	NS10	NS10_Q29H	Q	29	H	1	0.0397	0.0397	0	0.0871742	9.0101	0.3	0.0871742	9.0101	0.3				0	0	FALSE	FALSE	-1	-1	-1	-1	-1	-1
Alpha	NS10	NS10_Q29P	Q	29	P	1	0.0392	0.0392	-1	0.198427	-31.014	1.9	0.198427	31.014	1.9				0	0	FALSE	FALSE	-1	-1	-1	-1	-1	-1
Alpha	NS10	NS10_R20I	R	20	I	1	0.9957	0.9957	-3	-0.99999	-43.0281	9	0.99999	43.0281	9				0	0	FALSE	FALSE	-1	-1	-1	-1	-1	-1
Alpha	NS10	NS10_R24C	R	24	C	3	0.9752	0.9864	-3	-1.00989	-53.0428	7	1.00989	53.0428	7				0	0	FALSE	FALSE	-1	-1	-1	-1	-1	-1
Alpha	NS10	NS10_R24L	R	24	L	1	0.9983	0.9983	-2	-0.99999	-43.0281	8.3	0.99999	43.0281	8.3				0	0	FALSE	FALSE	-1	-1	-1	-1	-1	-1
Alpha	NS10	NS10_R24P	R	24	P	1	0.05	0.05	-2	-0.801563	-59.0705	2.9	0.801563	59.0705	2.9				0	0	FALSE	FALSE	-1	-1	-1	-1	-1	-1
Alpha	NS10	NS10_S15C	S	15	C	1	0.4031	0.4031	-1	0.290054	16.0656	3.3	0.290054	16.0656	3.3				0	0	FALSE	FALSE	-1	-1	-1	-1	-1	-1
Alpha	NS10	NS10_S15K	S	15	K	1	0.1122	0.1122	0	1.29896	41.095	-3.1	1.29896	41.095	3.1				0	0	FALSE	FALSE	-1	-1	-1	-1	-1	-1
Alpha	NS10	NS10_S23F	S	23	F	3	0.9883	0.9925	-2	0.299955	60.0965	3.6	0.299955	60.0965	3.6				0	0	FALSE	FALSE	-1	-1	-1	-1	-1	-1
Alpha	NS10	NS10_S23I	S	23	I	1	0.0497	0.0497	-2	0.299955	26.0803	5.3	0.299955	26.0803	5.3				0	0	FALSE	FALSE	-1	-1	-1	-1	-1	-1
Alpha	NS10	NS10_S23P	S	23	P	1	0.9994	0.9994	-1	0.498382	10.0379	-0.8	0.498382	10.0379	0.8				0	0	FALSE	FALSE	-1	-1	-1	-1	-1	-1
Alpha	NS10	NS10_V30L	V	30	L	2	0.51955	1	1	0.0261132	14.0266	-0.4	0.0261132	14.0266	0.4				0	0	FALSE	FALSE	-1	-1	-1	-1	-1	-1
Alpha	NS10	NS10_V30T	V	30	T	1	0.0395	0.0395	0	-0.335792	1.9729	-4.9	0.335792	1.9729	4.9				0	0	FALSE	FALSE	-1	-1	-1	-1	-1	-1
Alpha	NS10	NS10_V32I	V	32	I	3	0.0625	0.0773	3	0.0261132	14.0266	0.3	0.0261132	14.0266	0.3				0	0	FALSE	FALSE	-1	-1	-1	-1	-1	-1
Alpha	NS10	NS10_V33D	V	33	D	3	0.0413	0.0854	-3	-0.969585	15.9564	-7.7	0.969585	15.9564	7.7				0	0	FALSE	FALSE	-1	-1	-1	-1	-1	-1
Alpha	NS10	NS10_V33Q	V	33	Q	2	0.03775	0.043	-2	0.0261132	28.9982	-7.7	0.0261132	28.9982	7.7				0	0	FALSE	FALSE	-1	-1	-1	-1	-1	-1
Alpha	NS10	NS10_V33T	V	33	T	1	0.048	0.048	0	-0.335792	1.9729	-4.9	0.335792	1.9729	4.9				0	0	FALSE	FALSE	-1	-1	-1	-1	-1	-1
Alpha	NS10	NS10_V6I	V	6	I	1	0.9938	0.9938	3	0.0261132	14.0266	0.3	0.0261132	14.0266	0.3				0	0	FALSE	FALSE	-1	-1	-1	-1	-1	-1
Alpha	NS10	NS10_Y14F	Y	14	F	1	0.4815	0.4815	3	0.000999001	-15.9994	4.1	0.000999001	15.9994	4.1				0	0	FALSE	FALSE	-1	-1	-1	-1	-1	-1
Alpha	NS10	NS10_Y26N	Y	26	N	1	0.0556	0.0556	-2	0.000999001	-49.0706	-2.2	0.000999001	49.0706	2.2				0	0	FALSE	FALSE	-1	-1	-1	-1	-1	-1
Alpha	NS10	NS10_Y26S	Y	26	S	1	0.0301	0.0301	-2	-0.298956	-76.0959	0.5	0.298956	76.0959	0.5				0	0	FALSE	FALSE	-1	-1	-1	-1	-1	-1
Alpha	NS10	NS10_Y3H	Y	3	H	1	0.0498	0.0498	2	0.0881732	-26.0339	-1.9	0.0881732	26.0339	1.9				0	0	FALSE	FALSE	-1	-1	-1	-1	-1	-1
Alpha	NS3	NS3_A103P	A	103	P	2	0.06255	0.0671	-1	0.162654	26.0373	-3.4	0.162654	26.0373	3.4				181	15	FALSE	FALSE	-1	-1	-1	-1	-1	-1
Alpha	NS3	NS3_A103S	A	103	S	1	0.1089	0.1089	1	-0.335728	15.9994	-2.6	0.335728	15.9994	2.6				1957	205	FALSE	FALSE	-1	-1	-1	-1	-1	-1
Alpha	NS3	NS3_A103T	A	103	T	1	1	1	0	-0.397678	30.026	-2.5	0.397678	30.026	2.5				3677	144	FALSE	FALSE	-1	-1	-1	-1	-1	-1
Alpha	NS3	NS3_A110S	A	110	S	2	0.0427	0.0441	1	-0.335728	15.9994	-2.6	0.335728	15.9994	2.6				10878	2452	FALSE	FALSE	-1	-1	-1	0.920573	1	1
Alpha	NS3	NS3_A110V	A	110	V	1	0.9935	0.9935	0	-0.0618862	28.0531	2.4	0.0618862	28.0531	2.4				20461	903	FALSE	FALSE	-1	-1	-1	-1	-1	-1
Alpha	NS3	NS3_A143D	A	143	D	1	0.031	0.031	-2	-1.03147	44.0095	-5.3	1.03147	44.0095	5.3				50	3	FALSE	FALSE	-1	-1	-1	-1	-1	-1
Alpha	NS3	NS3_A143S	A	143	S	5	0.989	0.9979	1	-0.335728	15.9994	-2.6	0.335728	15.9994	2.6				685	165	FALSE	FALSE	-1	-1	-1	-1	-1	-1
Alpha	NS3	NS3_A23S	A	23	S	2	0.9964	0.9983	1	-0.335728	15.9994	-2.6	0.335728	15.9994	2.6				5502	684	FALSE	FALSE	-1	-1	-1	-1	-1	-1
Alpha	NS3	NS3_A23T	A	23	T	3	0.0342	0.0402	0	-0.397678	30.026	-2.5	0.397678	30.026	2.5				467	36	FALSE	FALSE	-1	-1	-1	-1	-1	-1
Alpha	NS3	NS3_A23V	A	23	V	2	0.5166	0.9947	0	-0.0618862	28.0531	2.4	0.0618862	28.0531	2.4				7031	1131	FALSE	FALSE	-1	-1	-1	0.776048	0	0
Alpha	NS3	NS3_A31T	A	31	T	1	1	1	0	-0.397678	30.026	-2.5	0.397678	30.026	2.5				5606	159	FALSE	FALSE	-1	-1	-1	-1	-1	-1
Alpha	NS3	NS3_A33S	A	33	S	8	0.99735	0.9997	1	-0.335728	15.9994	-2.6	0.335728	15.9994	2.6				9360	710	FALSE	FALSE	0.910557	1	1	-1	-1	-1
Alpha	NS3	NS3_A33V	A	33	V	1	0.0333	0.0333	0	-0.0618862	28.0531	2.4	0.0618862	28.0531	2.4				333	2	FALSE	FALSE	-1	-1	-1	-1	-1	-1
Alpha	NS3	NS3_A39S	A	39	S	1	0.0392	0.0392	1	-0.335728	15.9994	-2.6	0.335728	15.9994	2.6				612	145	FALSE	FALSE	-1	-1	-1	-1	-1	-1
Alpha	NS3	NS3_A39T	A	39	T	1	0.9674	0.9674	0	-0.397678	30.026	-2.5	0.397678	30.026	2.5				2328	198	FALSE	FALSE	-1	-1	-1	-1	-1	-1
Alpha	NS3	NS3_A51S	A	51	S	1	1	1	1	-0.335728	15.9994	-2.6	0.335728	15.9994	2.6				451	79	FALSE	FALSE	-1	-1	-1	-1	-1	-1
Alpha	NS3	NS3_A54S	A	54	S	3	0.994	0.9983	1	-0.335728	15.9994	-2.6	0.335728	15.9994	2.6				7141	1943	FALSE	FALSE	-1	-1	-1	0.899766	0	0
Alpha	NS3	NS3_A54V	A	54	V	2	0.5098	0.9894	0	-0.0618862	28.0531	2.4	0.0618862	28.0531	2.4				14325	554	FALSE	FALSE	-1	-1	-1	-1	-1	-1
Alpha	NS3	NS3_A59T	A	59	T	1	0.9991	0.9991	0	-0.397678	30.026	-2.5	0.397678	30.026	2.5				2894	258	FALSE	FALSE	-1	-1	-1	-1	-1	-1
Alpha	NS3	NS3_A72S	A	72	S	2	0.94925	0.9725	1	-0.335728	15.9994	-2.6	0.335728	15.9994	2.6				1479	2116	FALSE	FALSE	-1	-1	-1	0.782392	0	0
Alpha	NS3	NS3_A99S	A	99	S	1	0.9961	0.9961	1	-0.335728	15.9994	-2.6	0.335728	15.9994	2.6				2967	675	FALSE	FALSE	-1	-1	-1	-1	-1	-1
Alpha	NS3	NS3_A99T	A	99	T	3	0.9973	0.9988	0	-0.397678	30.026	-2.5	0.397678	30.026	2.5				1505	197	FALSE	FALSE	-1	-1	-1	-1	-1	-1
Alpha	NS3	NS3_A99V	A	99	V	2	0.5182	0.9989	0	-0.0618862	28.0531	2.4	0.0618862	28.0531	2.4				8383	1314	FALSE	FALSE	-1	-1	-1	0.80238	0	0
Alpha	NS3	NS3_C133F	C	133	F	1	0.0652	0.0652	-2	0.00990099	44.0309	0.3	0.00990099	44.0309	0.3				21	7	FALSE	FALSE	-1	-1	-1	-1	-1	-1
Alpha	NS3	NS3_C133S	C	133	S	1	0.9264	0.9264	-1	-0.290054	-16.0656	-3.3	0.290054	16.0656	3.3				89	13	FALSE	FALSE	-1	-1	-1	-1	-1	-1
Alpha	NS3	NS3_C200R	C	200	R	1	0.0733	0.0733	-3	1.00989	53.0428	-7	1.00989	53.0428	7				183	8	FALSE	FALSE	-1	-1	-1	-1	-1	-1
Alpha	NS3	NS3_C200S	C	200	S	5	0.04	0.084	-1	-0.290054	-16.0656	-3.3	0.290054	16.0656	3.3				23	13	FALSE	FALSE	-1	-1	-1	-1	-1	-1
Alpha	NS3	NS3_D142H	D	142	H	1	1	1	-1	1.08287	22.0519	0.3	1.08287	22.0519	0.3				405	221	FALSE	FALSE	-1	-1	-1	-1	-1	-1
Alpha	NS3	NS3_D155Y	D	155	Y	8	0.99825	1	-3	0.994699	48.0858	2.2	0.994699	48.0858	2.2				29358	3775	FALSE	FALSE	0.198521	0	0	0.931213	1	1
Alpha	NS3	NS3_D173V	D	173	V	1	0.993	0.993	-3	0.969585	-15.9564	7.7	0.969585	15.9564	7.7				236	50	FALSE	FALSE	-1	-1	-1	-1	-1	-1
Alpha	NS3	NS3_D173Y	D	173	Y	6	0.94765	0.991	-3	0.994699	48.0858	2.2	0.994699	48.0858	2.2				310	86	FALSE	FALSE	0.8053	0	0	-1	-1	-1
Alpha	NS3	NS3_D183N	D	183	N	9	0.9996	1	1	0.995698	-0.9848	0	0.995698	0.9848	0				383	382	FALSE	FALSE	0.933879	1	1	-1	-1	-1
Alpha	NS3	NS3_D183Y	D	183	Y	1	0.034	0.034	-3	0.994699	48.0858	2.2	0.994699	48.0858	2.2				205	23	FALSE	FALSE	-1	-1	-1	-1	-1	-1
Alpha	NS3	NS3_D210G	D	210	G	1	1	1	-1	0.995698	-58.0361	3.1	0.995698	58.0361	3.1				87	83	FALSE	FALSE	-1	-1	-1	-1	-1	-1
Alpha	NS3	NS3_D222A	D	222	A	1	0.0508	0.0508	-2	1.03147	-44.0095	5.3	1.03147	44.0095	5.3				77	11	FALSE	FALSE	-1	-1	-1	-1	-1	-1
Alpha	NS3	NS3_D22F	D	22	F	3	0.0345	0.0405	-3	0.995698	32.0864	6.3	0.995698	32.0864	6.3				45	3	FALSE	FALSE	-1	-1	-1	-1	-1	-1
Alpha	NS3	NS3_D22Y	D	22	Y	1	0.0465	0.0465	-3	0.994699	48.0858	2.2	0.994699	48.0858	2.2				2275	708	FALSE	FALSE	-1	-1	-1	-1	-1	-1
Alpha	NS3	NS3_D238N	D	238	N	1	0.9905	0.9905	1	0.995698	-0.9848	0	0.995698	0.9848	0				162	6	FALSE	FALSE	-1	-1	-1	-1	-1	-1
Alpha	NS3	NS3_D238Y	D	238	Y	1	0.9785	0.9785	-3	0.994699	48.0858	2.2	0.994699	48.0858	2.2				4536	25	FALSE	FALSE	-1	-1	-1	-1	-1	-1
Alpha	NS3	NS3_D250V	D	250	V	2	0.0566	0.0802	-3	0.969585	-15.9564	7.7	0.969585	15.9564	7.7				3	1	FALSE	FALSE	-1	-1	-1	-1	-1	-1
Alpha	NS3	NS3_D265G	D	265	G	1	0.1067	0.1067	-1	0.995698	-58.0361	3.1	0.995698	58.0361	3.1				139	13	FALSE	FALSE	-1	-1	-1	-1	-1	-1
Alpha	NS3	NS3_D27A	D	27	A	1	0.0339	0.0339	-2	1.03147	-44.0095	5.3	1.03147	44.0095	5.3				184	40	FALSE	FALSE	-1	-1	-1	-1	-1	-1
Alpha	NS3	NS3_D27H	D	27	H	1	1	1	-1	1.08287	22.0519	0.3	1.08287	22.0519	0.3				5799	166	FALSE	FALSE	-1	-1	-1	-1	-1	-1
Alpha	NS3	NS3_D27N	D	27	N	2	0.58765	1	1	0.995698	-0.9848	0	0.995698	0.9848	0				641	28	FALSE	FALSE	-1	-1	-1	-1	-1	-1
Alpha	NS3	NS3_D27Y	D	27	Y	1	0.9609	0.9609	-3	0.994699	48.0858	2.2	0.994699	48.0858	2.2				12151	975	FALSE	FALSE	-1	-1	-1	-1	-1	-1
Alpha	NS3	NS3_D2H	D	2	H	1	0.0319	0.0319	-1	1.08287	22.0519	0.3	1.08287	22.0519	0.3				59	4	FALSE	FALSE	-1	-1	-1	-1	-1	-1
Alpha	NS3	NS3_D2Y	D	2	Y	1	0.0585	0.0585	-3	0.994699	48.0858	2.2	0.994699	48.0858	2.2				496	58	FALSE	FALSE	-1	-1	-1	-1	-1	-1
Alpha	NS3	NS3_E181K	E	181	K	1	0.44	0.44	1	1.91704	-0.9417	-0.4	1.91704	0.9417	0.4				642	35	FALSE	FALSE	-1	-1	-1	-1	-1	-1
Alpha	NS3	NS3_E19G	E	19	G	2	0.98265	0.9939	-2	0.918037	-72.0627	3.1	0.918037	72.0627	3.1				674	306	FALSE	FALSE	-1	-1	-1	-1	-1	-1
Alpha	NS3	NS3_E19K	E	19	K	1	0.0356	0.0356	1	1.91704	-0.9417	-0.4	1.91704	0.9417	0.4				338	13	FALSE	FALSE	-1	-1	-1	-1	-1	-1
Alpha	NS3	NS3_E19V	E	19	V	3	0.0373	0.0611	-2	0.891923	-29.983	7.7	0.891923	29.983	7.7				189	5	FALSE	FALSE	-1	-1	-1	-1	-1	-1
Alpha	NS3	NS3_E226G	E	226	G	6	0.9982	1	-2	0.918037	-72.0627	3.1	0.918037	72.0627	3.1				248	1402	FALSE	FALSE	0.995826	3	1	0.983536	7	1
Alpha	NS3	NS3_E239D	E	239	D	2	0.99805	0.9984	2	-0.0776616	-14.0266	0	0.0776616	14.0266	0				5148	395	FALSE	FALSE	-1	-1	-1	-1	-1	-1
Alpha	NS3	NS3_E239K	E	239	K	1	0.9979	0.9979	1	1.91704	-0.9417	-0.4	1.91704	0.9417	0.4				279	86	FALSE	FALSE	-1	-1	-1	-1	-1	-1
Alpha	NS3	NS3_E241D	E	241	D	1	0.9981	0.9981	2	-0.0776616	-14.0266	0	0.0776616	14.0266	0				712	35	FALSE	FALSE	-1	-1	-1	-1	-1	-1
Alpha	NS3	NS3_F114L	F	114	L	1	0.0851	0.0851	0	0	-34.0162	1	0	34.0162	1				219	30	FALSE	FALSE	-1	-1	-1	-1	-1	-1
Alpha	NS3	NS3_F120L	F	120	L	2	0.0374	0.0436	0	0	-34.0162	1	0	34.0162	1				477	96	FALSE	FALSE	-1	-1	-1	-1	-1	-1
Alpha	NS3	NS3_F146E	F	146	E	1	0.039	0.039	-3	-0.918037	-18.0598	-6.3	0.918037	18.0598	6.3				1	0	FALSE	FALSE	-1	-1	-1	-1	-1	-1
Alpha	NS3	NS3_F146V	F	146	V	1	0.0355	0.0355	-1	-0.0261132	-48.0428	1.4	0.0261132	48.0428	1.4				0	0	FALSE	FALSE	-1	-1	-1	-1	-1	-1
Alpha	NS3	NS3_F207L	F	207	L	1	1	1	0	0	-34.0162	1	0	34.0162	1				763	287	FALSE	FALSE	-1	-1	-1	-1	-1	-1
Alpha	NS3	NS3_F28V	F	28	V	1	0.0339	0.0339	-1	-0.0261132	-48.0428	1.4	0.0261132	48.0428	1.4				51	3	FALSE	FALSE	-1	-1	-1	-1	-1	-1
Alpha	NS3	NS3_F43I	F	43	I	1	0.1844	0.1844	0	0	-34.0162	1.7	0	34.0162	1.7				64	10	FALSE	FALSE	-1	-1	-1	-1	-1	-1
Alpha	NS3	NS3_F43L	F	43	L	2	0.0525	0.071	0	0	-34.0162	1	0	34.0162	1				2486	70	FALSE	FALSE	-1	-1	-1	-1	-1	-1
Alpha	NS3	NS3_F79L	F	79	L	2	0.0857	0.1204	0	0	-34.0162	1	0	34.0162	1				880	27	FALSE	FALSE	-1	-1	-1	-1	-1	-1
Alpha	NS3	NS3_G100C	G	100	C	2	0.8726	1	-3	-0.00990099	46.0916	2.9	0.00990099	46.0916	2.9				9556	1135	FALSE	FALSE	-1	-1	-1	0.904672	1	1
Alpha	NS3	NS3_G100S	G	100	S	1	0.9925	0.9925	0	-0.299955	30.026	-0.4	0.299955	30.026	0.4				1754	63	FALSE	FALSE	-1	-1	-1	-1	-1	-1
Alpha	NS3	NS3_G11R	G	11	R	1	0.041	0.041	-2	0.99999	99.1344	-4.1	0.99999	99.1344	4.1				1126	53	FALSE	FALSE	-1	-1	-1	-1	-1	-1
Alpha	NS3	NS3_G11V	G	11	V	1	0.0341	0.0341	-3	-0.0261132	42.0797	4.6	0.0261132	42.0797	4.6				186	22	FALSE	FALSE	-1	-1	-1	-1	-1	-1
Alpha	NS3	NS3_G172C	G	172	C	1	0.0792	0.0792	-3	-0.00990099	46.0916	2.9	0.00990099	46.0916	2.9				15159	1359	FALSE	FALSE	-1	-1	-1	0.68154	0	0
Alpha	NS3	NS3_G172P	G	172	P	2	0.04195	0.0452	-2	0.198427	40.0639	-1.2	0.198427	40.0639	1.2				0	0	FALSE	FALSE	-1	-1	-1	-1	-1	-1
Alpha	NS3	NS3_G172V	G	172	V	306	0.9077	1	-3	-0.0261132	42.0797	4.6	0.0261132	42.0797	4.6				6074	55100	FALSE	FALSE	0.824574	0	0	0.98715	14	1
Alpha	NS3	NS3_G174C	G	174	C	4	0.6226	0.8348	-3	-0.00990099	46.0916	2.9	0.00990099	46.0916	2.9				1419	1116	FALSE	FALSE	-1	-1	-1	0.903049	1	1
Alpha	NS3	NS3_G174D	G	174	D	6	0.62905	0.9144	-1	-0.995698	58.0361	-3.1	0.995698	58.0361	3.1				2050	1535	FALSE	FALSE	0.369197	0	0	0.943611	1	1
Alpha	NS3	NS3_G174V	G	174	V	1	0.8148	0.8148	-3	-0.0261132	42.0797	4.6	0.0261132	42.0797	4.6				1129	417	FALSE	FALSE	-1	-1	-1	-1	-1	-1
Alpha	NS3	NS3_G18S	G	18	S	1	0.0381	0.0381	0	-0.299955	30.026	-0.4	0.299955	30.026	0.4				498	99	FALSE	FALSE	-1	-1	-1	-1	-1	-1
Alpha	NS3	NS3_G18V	G	18	V	4	0.03705	0.0543	-3	-0.0261132	42.0797	4.6	0.0261132	42.0797	4.6				7761	414	FALSE	FALSE	-1	-1	-1	-1	-1	-1
Alpha	NS3	NS3_G196V	G	196	V	2	0.87705	0.888	-3	-0.0261132	42.0797	4.6	0.0261132	42.0797	4.6				1649	2369	FALSE	FALSE	-1	-1	-1	0.981705	3	1
Alpha	NS3	NS3_G224A	G	224	A	1	0.05	0.05	0	0.035773	14.0266	2.2	0.035773	14.0266	2.2				55	12	FALSE	FALSE	-1	-1	-1	-1	-1	-1
Alpha	NS3	NS3_G224C	G	224	C	1	0.9949	0.9949	-3	-0.00990099	46.0916	2.9	0.00990099	46.0916	2.9				9481	2128	FALSE	FALSE	-1	-1	-1	0.269572	0	0
Alpha	NS3	NS3_G224V	G	224	V	4	0.99355	0.9965	-3	-0.0261132	42.0797	4.6	0.0261132	42.0797	4.6				933	582	FALSE	FALSE	-1	-1	-1	-1	-1	-1
Alpha	NS3	NS3_G251D	G	251	D	1	0.9943	0.9943	-1	-0.995698	58.0361	-3.1	0.995698	58.0361	3.1				484	287	FALSE	FALSE	-1	-1	-1	-1	-1	-1
Alpha	NS3	NS3_G251V	G	251	V	2	0.5268	0.9939	-3	-0.0261132	42.0797	4.6	0.0261132	42.0797	4.6				211	7200	FALSE	FALSE	-1	-1	-1	0.98355	3	1
Alpha	NS3	NS3_G254V	G	254	V	3	0.0369	0.0893	-3	-0.0261132	42.0797	4.6	0.0261132	42.0797	4.6				2028	419	FALSE	FALSE	-1	-1	-1	-1	-1	-1
Alpha	NS3	NS3_G44E	G	44	E	1	0.9983	0.9983	-2	-0.918037	72.0627	-3.1	0.918037	72.0627	3.1				783	66	FALSE	FALSE	-1	-1	-1	-1	-1	-1
Alpha	NS3	NS3_G44N	G	44	N	1	0.0346	0.0346	0	0	57.0513	-3.1	0	57.0513	3.1				0	0	FALSE	FALSE	-1	-1	-1	-1	-1	-1
Alpha	NS3	NS3_G44R	G	44	R	2	0.99665	0.9991	-2	0.99999	99.1344	-4.1	0.99999	99.1344	4.1				2991	358	FALSE	FALSE	-1	-1	-1	-1	-1	-1
Alpha	NS3	NS3_G44V	G	44	V	1	0.9946	0.9946	-3	-0.0261132	42.0797	4.6	0.0261132	42.0797	4.6				919	747	FALSE	FALSE	-1	-1	-1	-1	-1	-1
Alpha	NS3	NS3_G49I	G	49	I	1	0.0366	0.0366	-4	0	56.1063	4.9	0	56.1063	4.9				0	27	FALSE	FALSE	-1	-1	-1	-1	-1	-1
Alpha	NS3	NS3_G49S	G	49	S	2	0.99895	0.9993	0	-0.299955	30.026	-0.4	0.299955	30.026	0.4				669	135	FALSE	FALSE	-1	-1	-1	-1	-1	-1
Alpha	NS3	NS3_G49V	G	49	V	1	0.0552	0.0552	-3	-0.0261132	42.0797	4.6	0.0261132	42.0797	4.6				10679	240	FALSE	FALSE	-1	-1	-1	-1	-1	-1
Alpha	NS3	NS3_G76S	G	76	S	1	0.6145	0.6145	0	-0.299955	30.026	-0.4	0.299955	30.026	0.4				1607	109	FALSE	FALSE	-1	-1	-1	-1	-1	-1
Alpha	NS3	NS3_G76V	G	76	V	1	0.034	0.034	-3	-0.0261132	42.0797	4.6	0.0261132	42.0797	4.6				7	6	FALSE	FALSE	-1	-1	-1	-1	-1	-1
Alpha	NS3	NS3_H150Y	H	150	Y	1	0.9977	0.9977	2	-0.0881732	26.0339	1.9	0.0881732	26.0339	1.9				244	35	FALSE	FALSE	-1	-1	-1	-1	-1	-1
Alpha	NS3	NS3_H182Y	H	182	Y	1	0.0321	0.0321	2	-0.0881732	26.0339	1.9	0.0881732	26.0339	1.9				2757	1202	FALSE	FALSE	-1	-1	-1	0.927989	1	1
Alpha	NS3	NS3_H204R	H	204	R	1	0.0493	0.0493	0	0.912816	19.0464	-1.3	0.912816	19.0464	1.3				210	10	FALSE	FALSE	-1	-1	-1	-1	-1	-1
Alpha	NS3	NS3_H227R	H	227	R	1	0.9949	0.9949	0	0.912816	19.0464	-1.3	0.912816	19.0464	1.3				296	124	FALSE	FALSE	-1	-1	-1	-1	-1	-1
Alpha	NS3	NS3_H247Q	H	247	Q	1	0.0321	0.0321	0	-0.0871742	-9.0101	-0.3	0.0871742	9.0101	0.3				83	0	FALSE	FALSE	-1	-1	-1	-1	-1	-1
Alpha	NS3	NS3_H78N	H	78	N	2	0.46015	0.8788	1	-0.0871742	-23.0367	-0.3	0.0871742	23.0367	0.3				30	9	FALSE	FALSE	-1	-1	-1	-1	-1	-1
Alpha	NS3	NS3_H78Y	H	78	Y	7	0.992	0.9985	2	-0.0881732	26.0339	1.9	0.0881732	26.0339	1.9				86916	2519	TRUE	FALSE	0.187317	0	0	0.914095	2	1
Alpha	NS3	NS3_H93Q	H	93	Q	1	0.99	0.99	0	-0.0871742	-9.0101	-0.3	0.0871742	9.0101	0.3				344	6	FALSE	FALSE	-1	-1	-1	-1	-1	-1
Alpha	NS3	NS3_I123M	I	123	M	1	0.0738	0.0738	1	-0.259747	18.0384	-2.6	0.259747	18.0384	2.6				284	5	FALSE	FALSE	-1	-1	-1	-1	-1	-1
Alpha	NS3	NS3_I124L	I	124	L	1	0.0312	0.0312	2	0	0	-0.7	0	0	0.7				581	91	FALSE	FALSE	-1	-1	-1	-1	-1	-1
Alpha	NS3	NS3_I124T	I	124	T	1	0.0795	0.0795	-1	-0.361905	-12.0537	-5.2	0.361905	12.0537	5.2				389	50	FALSE	FALSE	-1	-1	-1	-1	-1	-1
Alpha	NS3	NS3_I158T	I	158	T	1	1	1	-1	-0.361905	-12.0537	-5.2	0.361905	12.0537	5.2				160	32	FALSE	FALSE	-1	-1	-1	-1	-1	-1
Alpha	NS3	NS3_I167F	I	167	F	1	0.0349	0.0349	0	0	34.0162	-1.7	0	34.0162	1.7				5	1	FALSE	FALSE	-1	-1	-1	-1	-1	-1
Alpha	NS3	NS3_I169V	I	169	V	2	0.039	0.0412	3	-0.0261132	-14.0266	-0.3	0.0261132	14.0266	0.3				1188	16	FALSE	FALSE	-1	-1	-1	-1	-1	-1
Alpha	NS3	NS3_I179T	I	179	T	1	0.0314	0.0314	-1	-0.361905	-12.0537	-5.2	0.361905	12.0537	5.2				1037	49	FALSE	FALSE	-1	-1	-1	-1	-1	-1
Alpha	NS3	NS3_I186V	I	186	V	3	0.9982	0.9989	3	-0.0261132	-14.0266	-0.3	0.0261132	14.0266	0.3				479	57	FALSE	FALSE	-1	-1	-1	-1	-1	-1
Alpha	NS3	NS3_I20T	I	20	T	1	0.9533	0.9533	-1	-0.361905	-12.0537	-5.2	0.361905	12.0537	5.2				831	142	FALSE	FALSE	-1	-1	-1	-1	-1	-1
Alpha	NS3	NS3_I20V	I	20	V	3	0.0345	0.0402	3	-0.0261132	-14.0266	-0.3	0.0261132	14.0266	0.3				641	510	FALSE	FALSE	-1	-1	-1	-1	-1	-1
Alpha	NS3	NS3_I236N	I	236	N	1	0.0551	0.0551	-3	0	0.945	-8	0	0.945	8				4	0	FALSE	FALSE	-1	-1	-1	-1	-1	-1
Alpha	NS3	NS3_I249L	I	249	L	2	0.0525	0.0723	2	0	0	-0.7	0	0	0.7				49	0	FALSE	FALSE	-1	-1	-1	-1	-1	-1
Alpha	NS3	NS3_I263L	I	263	L	1	0.9831	0.9831	2	0	0	-0.7	0	0	0.7				163	15	FALSE	FALSE	-1	-1	-1	-1	-1	-1
Alpha	NS3	NS3_I263T	I	263	T	1	0.0315	0.0315	-1	-0.361905	-12.0537	-5.2	0.361905	12.0537	5.2				293	56	FALSE	FALSE	-1	-1	-1	-1	-1	-1
Alpha	NS3	NS3_I35L	I	35	L	1	0.1057	0.1057	2	0	0	-0.7	0	0	0.7				244	19	FALSE	FALSE	-1	-1	-1	-1	-1	-1
Alpha	NS3	NS3_I35V	I	35	V	1	0.9977	0.9977	3	-0.0261132	-14.0266	-0.3	0.0261132	14.0266	0.3				909	26	FALSE	FALSE	-1	-1	-1	-1	-1	-1
Alpha	NS3	NS3_I37K	I	37	K	2	0.98505	1	-3	0.999001	15.0147	-8.4	0.999001	15.0147	8.4				129	4	FALSE	FALSE	-1	-1	-1	-1	-1	-1
Alpha	NS3	NS3_I37T	I	37	T	2	0.99895	0.9992	-1	-0.361905	-12.0537	-5.2	0.361905	12.0537	5.2				4124	365	FALSE	FALSE	-1	-1	-1	-1	-1	-1
Alpha	NS3	NS3_I47T	I	47	T	2	0.5247	1	-1	-0.361905	-12.0537	-5.2	0.361905	12.0537	5.2				941	12	FALSE	FALSE	-1	-1	-1	-1	-1	-1
Alpha	NS3	NS3_I47V	I	47	V	3	0.9982	0.9983	3	-0.0261132	-14.0266	-0.3	0.0261132	14.0266	0.3				3778	108	FALSE	FALSE	-1	-1	-1	-1	-1	-1
Alpha	NS3	NS3_I62T	I	62	T	3	0.9951	0.9986	-1	-0.361905	-12.0537	-5.2	0.361905	12.0537	5.2				1304	1483	FALSE	FALSE	-1	-1	-1	0.979167	2	1
Alpha	NS3	NS3_I63T	I	63	T	4	0.64525	1	-1	-0.361905	-12.0537	-5.2	0.361905	12.0537	5.2				3178	473	FALSE	FALSE	-1	-1	-1	-1	-1	-1
Alpha	NS3	NS3_K136I	K	136	I	1	0.0351	0.0351	-3	-0.999001	-15.0147	8.4	0.999001	15.0147	8.4				351	5	FALSE	FALSE	-1	-1	-1	-1	-1	-1
Alpha	NS3	NS3_K16L	K	16	L	3	0.0467	0.0753	-2	-0.999001	-15.0147	7.7	0.999001	15.0147	7.7				1	1	FALSE	FALSE	-1	-1	-1	-1	-1	-1
Alpha	NS3	NS3_K198N	K	198	N	2	0.805	0.9192	0	-0.999001	-14.0697	0.4	0.999001	14.0697	0.4				199	181	FALSE	FALSE	-1	-1	-1	-1	-1	-1
Alpha	NS3	NS3_K21N	K	21	N	3	0.9636	0.9968	0	-0.999001	-14.0697	0.4	0.999001	14.0697	0.4				9668	1369	FALSE	FALSE	-1	-1	-1	0.715479	0	0
Alpha	NS3	NS3_K21Q	K	21	Q	2	0.03635	0.04	1	-0.999001	-0.0431	0.4	0.999001	0.0431	0.4				12	3	FALSE	FALSE	-1	-1	-1	-1	-1	-1
Alpha	NS3	NS3_K235E	K	235	E	1	0.0317	0.0317	1	-1.91704	0.9417	0.4	1.91704	0.9417	0.4				36	5	FALSE	FALSE	-1	-1	-1	-1	-1	-1
Alpha	NS3	NS3_K66N	K	66	N	1	0.9963	0.9963	0	-0.999001	-14.0697	0.4	0.999001	14.0697	0.4				686	136	FALSE	FALSE	-1	-1	-1	-1	-1	-1
Alpha	NS3	NS3_K66Q	K	66	Q	1	0.0467	0.0467	1	-0.999001	-0.0431	0.4	0.999001	0.0431	0.4				144	17	FALSE	FALSE	-1	-1	-1	-1	-1	-1
Alpha	NS3	NS3_K67R	K	67	R	2	0.99655	1	2	0.000989001	28.0134	-0.6	0.000989001	28.0134	0.6				514	55	FALSE	FALSE	-1	-1	-1	-1	-1	-1
Alpha	NS3	NS3_K75N	K	75	N	1	1	1	0	-0.999001	-14.0697	0.4	0.999001	14.0697	0.4				2121	3367	FALSE	FALSE	-1	-1	-1	1	5	1
Alpha	NS3	NS3_L108F	L	108	F	4	0.95645	1	0	0	34.0162	-1	0	34.0162	1				14755	1818	FALSE	FALSE	-1	-1	-1	0.481861	0	0
Alpha	NS3	NS3_L108P	L	108	P	1	0.0676	0.0676	-3	0.198427	-16.0424	-5.4	0.198427	16.0424	5.4				160	11	FALSE	FALSE	-1	-1	-1	-1	-1	-1
Alpha	NS3	NS3_L127F	L	127	F	2	0.52	1	0	0	34.0162	-1	0	34.0162	1				2199	210	FALSE	FALSE	-1	-1	-1	-1	-1	-1
Alpha	NS3	NS3_L127R	L	127	R	1	0.0343	0.0343	-2	0.99999	43.0281	-8.3	0.99999	43.0281	8.3				5	0	FALSE	FALSE	-1	-1	-1	-1	-1	-1
Alpha	NS3	NS3_L129F	L	129	F	2	0.03325	0.0342	0	0	34.0162	-1	0	34.0162	1				1431	604	FALSE	FALSE	-1	-1	-1	-1	-1	-1
Alpha	NS3	NS3_L139E	L	139	E	1	0.0402	0.0402	-3	-0.918037	15.9564	-7.3	0.918037	15.9564	7.3				0	0	FALSE	FALSE	-1	-1	-1	-1	-1	-1
Alpha	NS3	NS3_L139V	L	139	V	1	0.0362	0.0362	1	-0.0261132	-14.0266	0.4	0.0261132	14.0266	0.4				35	1	FALSE	FALSE	-1	-1	-1	-1	-1	-1
Alpha	NS3	NS3_L140F	L	140	F	5	0.0687	1	0	0	34.0162	-1	0	34.0162	1				68511	613	FALSE	FALSE	-1	-1	-1	-1	-1	-1
Alpha	NS3	NS3_L147F	L	147	F	3	0.0854	0.9685	0	0	34.0162	-1	0	34.0162	1				1398	269	FALSE	FALSE	-1	-1	-1	-1	-1	-1
Alpha	NS3	NS3_L147I	L	147	I	2	0.9694	0.986	2	0	0	0.7	0	0	0.7				703	9	FALSE	FALSE	-1	-1	-1	-1	-1	-1
Alpha	NS3	NS3_L15F	L	15	F	16	0.5644	1	0	0	34.0162	-1	0	34.0162	1				10753	2647	FALSE	FALSE	0.904867	1	1	0.918249	1	1
Alpha	NS3	NS3_L15V	L	15	V	1	0.2934	0.2934	1	-0.0261132	-14.0266	0.4	0.0261132	14.0266	0.4				364	23	FALSE	FALSE	-1	-1	-1	-1	-1	-1
Alpha	NS3	NS3_L3F	L	3	F	1	0.0376	0.0376	0	0	34.0162	-1	0	34.0162	1				434	16	FALSE	FALSE	-1	-1	-1	-1	-1	-1
Alpha	NS3	NS3_L41F	L	41	F	7	0.9942	1	0	0	34.0162	-1	0	34.0162	1				9954	1042	FALSE	FALSE	0.447884	0	0	0.646958	0	0
Alpha	NS3	NS3_L41P	L	41	P	2	0.03415	0.0351	-3	0.198427	-16.0424	-5.4	0.198427	16.0424	5.4				1449	39	FALSE	FALSE	-1	-1	-1	-1	-1	-1
Alpha	NS3	NS3_L46F	L	46	F	1	0.9974	0.9974	0	0	34.0162	-1	0	34.0162	1				1436	1081	FALSE	FALSE	-1	-1	-1	0.979982	2	1
Alpha	NS3	NS3_L46I	L	46	I	2	0.05415	0.0778	2	0	0	0.7	0	0	0.7				231	97	FALSE	FALSE	-1	-1	-1	-1	-1	-1
Alpha	NS3	NS3_L52F	L	52	F	1	0.993	0.993	0	0	34.0162	-1	0	34.0162	1				6001	672	FALSE	FALSE	-1	-1	-1	-1	-1	-1
Alpha	NS3	NS3_L53F	L	53	F	3	0.9914	0.9968	0	0	34.0162	-1	0	34.0162	1				9692	1173	FALSE	FALSE	-1	-1	-1	0.385419	0	0
Alpha	NS3	NS3_L65I	L	65	I	1	0.9907	0.9907	2	0	0	0.7	0	0	0.7				295	56	FALSE	FALSE	-1	-1	-1	-1	-1	-1
Alpha	NS3	NS3_L73I	L	73	I	2	0.85325	0.9224	2	0	0	0.7	0	0	0.7				383	283	FALSE	FALSE	-1	-1	-1	-1	-1	-1
Alpha	NS3	NS3_L73S	L	73	S	1	0.0361	0.0361	-2	-0.299955	-26.0803	-4.6	0.299955	26.0803	4.6				0	1	FALSE	FALSE	-1	-1	-1	-1	-1	-1
Alpha	NS3	NS3_L83V	L	83	V	1	0.0377	0.0377	1	-0.0261132	-14.0266	0.4	0.0261132	14.0266	0.4				671	7	FALSE	FALSE	-1	-1	-1	-1	-1	-1
Alpha	NS3	NS3_L84V	L	84	V	1	0.0722	0.0722	1	-0.0261132	-14.0266	0.4	0.0261132	14.0266	0.4				41	10	FALSE	FALSE	-1	-1	-1	-1	-1	-1
Alpha	NS3	NS3_L85F	L	85	F	1	0.9289	0.9289	0	0	34.0162	-1	0	34.0162	1				9236	1820	FALSE	FALSE	-1	-1	-1	0.869213	0	0
Alpha	NS3	NS3_L86F	L	86	F	2	0.33475	0.4043	0	0	34.0162	-1	0	34.0162	1				1837	516	FALSE	FALSE	-1	-1	-1	-1	-1	-1
Alpha	NS3	NS3_L94I	L	94	I	1	0.9952	0.9952	2	0	0	0.7	0	0	0.7				6835	19	FALSE	FALSE	-1	-1	-1	-1	-1	-1
Alpha	NS3	NS3_L94P	L	94	P	1	0.0483	0.0483	-3	0.198427	-16.0424	-5.4	0.198427	16.0424	5.4				524	1272	FALSE	FALSE	-1	-1	-1	1	8	1
Alpha	NS3	NS3_M125I	M	125	I	4	0.99935	1	1	0.259747	-18.0384	2.6	0.259747	18.0384	2.6				1974	807	FALSE	FALSE	-1	-1	-1	-1	-1	-1
Alpha	NS3	NS3_M125K	M	125	K	1	0.0811	0.0811	-1	1.25875	-3.0237	-5.8	1.25875	3.0237	5.8				20	3	FALSE	FALSE	-1	-1	-1	-1	-1	-1
Alpha	NS3	NS3_M260I	M	260	I	2	0.04195	0.0483	1	0.259747	-18.0384	2.6	0.259747	18.0384	2.6				5270	100	FALSE	FALSE	-1	-1	-1	-1	-1	-1
Alpha	NS3	NS3_M260R	M	260	R	1	0.0467	0.0467	-1	1.25974	24.9897	-6.4	1.25974	24.9897	6.4				32	2	FALSE	FALSE	-1	-1	-1	-1	-1	-1
Alpha	NS3	NS3_M5I	M	5	I	1	0.0461	0.0461	1	0.259747	-18.0384	2.6	0.259747	18.0384	2.6				1145	63	FALSE	FALSE	-1	-1	-1	-1	-1	-1
Alpha	NS3	NS3_N137K	N	137	K	1	0.0355	0.0355	0	0.999001	14.0697	-0.4	0.999001	14.0697	0.4				261	33	FALSE	FALSE	-1	-1	-1	-1	-1	-1
Alpha	NS3	NS3_N137S	N	137	S	1	0.9952	0.9952	1	-0.299955	-27.0253	2.7	0.299955	27.0253	2.7				90	10	FALSE	FALSE	-1	-1	-1	-1	-1	-1
Alpha	NS3	NS3_N234T	N	234	T	1	0.0612	0.0612	0	-0.361905	-12.9987	2.8	0.361905	12.9987	2.8				127	5	FALSE	FALSE	-1	-1	-1	-1	-1	-1
Alpha	NS3	NS3_N257A	N	257	A	1	0.0479	0.0479	-2	0.035773	-43.0247	5.3	0.035773	43.0247	5.3				0	0	FALSE	FALSE	-1	-1	-1	-1	-1	-1
Alpha	NS3	NS3_N257E	N	257	E	1	0.2032	0.2032	0	-0.918037	15.0114	0	0.918037	15.0114	0				1	1	FALSE	FALSE	-1	-1	-1	-1	-1	-1
Alpha	NS3	NS3_N257H	N	257	H	1	0.0362	0.0362	1	0.0871742	23.0367	0.3	0.0871742	23.0367	0.3				1193	31	FALSE	FALSE	-1	-1	-1	-1	-1	-1
Alpha	NS3	NS3_N257I	N	257	I	1	0.0446	0.0446	-3	0	-0.945	8	0	0.945	8				32	5	FALSE	FALSE	-1	-1	-1	-1	-1	-1
Alpha	NS3	NS3_N257K	N	257	K	3	0.9852	0.9926	0	0.999001	14.0697	-0.4	0.999001	14.0697	0.4				236	299	FALSE	FALSE	-1	-1	-1	-1	-1	-1
Alpha	NS3	NS3_N257Y	N	257	Y	1	0.0672	0.0672	-2	-0.000999001	49.0706	2.2	0.000999001	49.0706	2.2				110	8	FALSE	FALSE	-1	-1	-1	-1	-1	-1
Alpha	NS3	NS3_P104L	P	104	L	6	0.9345	0.9904	-3	-0.198427	16.0424	5.4	0.198427	16.0424	5.4				8396	820	FALSE	FALSE	0.448017	0	0	-1	-1	-1
Alpha	NS3	NS3_P104S	P	104	S	4	0.07515	0.6391	-1	-0.498382	-10.0379	0.8	0.498382	10.0379	0.8				16102	154	FALSE	FALSE	-1	-1	-1	-1	-1	-1
Alpha	NS3	NS3_P240L	P	240	L	1	0.9921	0.9921	-3	-0.198427	16.0424	5.4	0.198427	16.0424	5.4				17291	726	FALSE	FALSE	-1	-1	-1	-1	-1	-1
Alpha	NS3	NS3_P258L	P	258	L	1	0.0319	0.0319	-3	-0.198427	16.0424	5.4	0.198427	16.0424	5.4				423	105	FALSE	FALSE	-1	-1	-1	-1	-1	-1
Alpha	NS3	NS3_P258S	P	258	S	2	0.1016	0.1589	-1	-0.498382	-10.0379	0.8	0.498382	10.0379	0.8				278	145	FALSE	FALSE	-1	-1	-1	-1	-1	-1
Alpha	NS3	NS3_P258T	P	258	T	1	0.0394	0.0394	-1	-0.560332	3.9887	0.9	0.560332	3.9887	0.9				70	4	FALSE	FALSE	-1	-1	-1	-1	-1	-1
Alpha	NS3	NS3_P25H	P	25	H	2	0.99745	0.9982	-2	-0.111253	40.0241	-1.6	0.111253	40.0241	1.6				500	115	FALSE	FALSE	-1	-1	-1	-1	-1	-1
Alpha	NS3	NS3_P25L	P	25	L	1	0.9875	0.9875	-3	-0.198427	16.0424	5.4	0.198427	16.0424	5.4				2316	153	FALSE	FALSE	-1	-1	-1	-1	-1	-1
Alpha	NS3	NS3_P25R	P	25	R	1	0.0339	0.0339	-2	0.801563	59.0705	-2.9	0.801563	59.0705	2.9				11	0	FALSE	FALSE	-1	-1	-1	-1	-1	-1
Alpha	NS3	NS3_P262L	P	262	L	1	0.9948	0.9948	-3	-0.198427	16.0424	5.4	0.198427	16.0424	5.4				1009	104	FALSE	FALSE	-1	-1	-1	-1	-1	-1
Alpha	NS3	NS3_P262R	P	262	R	1	1	1	-2	0.801563	59.0705	-2.9	0.801563	59.0705	2.9				45	1	FALSE	FALSE	-1	-1	-1	-1	-1	-1
Alpha	NS3	NS3_P267L	P	267	L	1	0.0382	0.0382	-3	-0.198427	16.0424	5.4	0.198427	16.0424	5.4				1853	140	FALSE	FALSE	-1	-1	-1	-1	-1	-1
Alpha	NS3	NS3_P267S	P	267	S	1	0.9949	0.9949	-1	-0.498382	-10.0379	0.8	0.498382	10.0379	0.8				1000	31	FALSE	FALSE	-1	-1	-1	-1	-1	-1
Alpha	NS3	NS3_P36S	P	36	S	1	0.064	0.064	-1	-0.498382	-10.0379	0.8	0.498382	10.0379	0.8				165	24	FALSE	FALSE	-1	-1	-1	-1	-1	-1
Alpha	NS3	NS3_P36T	P	36	T	1	0.0571	0.0571	-1	-0.560332	3.9887	0.9	0.560332	3.9887	0.9				78	1	FALSE	FALSE	-1	-1	-1	-1	-1	-1
Alpha	NS3	NS3_P42L	P	42	L	36	0.9921	1	-3	-0.198427	16.0424	5.4	0.198427	16.0424	5.4				27022	487	FALSE	FALSE	0.834829	0	0	-1	-1	-1
Alpha	NS3	NS3_Q185H	Q	185	H	2	0.51055	0.9903	0	0.0871742	9.0101	0.3	0.0871742	9.0101	0.3				8825	5909	FALSE	FALSE	-1	-1	-1	1	8	1
Alpha	NS3	NS3_Q213K	Q	213	K	1	0.9953	0.9953	1	0.999001	0.0431	-0.4	0.999001	0.0431	0.4				9046	482	FALSE	FALSE	-1	-1	-1	-1	-1	-1
Alpha	NS3	NS3_Q218E	Q	218	E	10	0.04305	0.0614	2	-0.918037	0.9848	0	0.918037	0.9848	0				215	10	FALSE	FALSE	0.38022	0	0	-1	-1	-1
Alpha	NS3	NS3_Q218H	Q	218	H	1	0.0357	0.0357	0	0.0871742	9.0101	0.3	0.0871742	9.0101	0.3				158	4	FALSE	FALSE	-1	-1	-1	-1	-1	-1
Alpha	NS3	NS3_Q218L	Q	218	L	1	0.9945	0.9945	-2	0	-14.9716	7.3	0	14.9716	7.3				119	16	FALSE	FALSE	-1	-1	-1	-1	-1	-1
Alpha	NS3	NS3_Q38L	Q	38	L	4	0.9851	1	-2	0	-14.9716	7.3	0	14.9716	7.3				931	38	FALSE	FALSE	-1	-1	-1	-1	-1	-1
Alpha	NS3	NS3_Q57Y	Q	57	Y	5	0.713	1	-1	-0.000999001	35.044	2.2	0.000999001	35.044	2.2				99	74	FALSE	FALSE	-1	-1	-1	-1	-1	-1
Alpha	NS3	NS3_Q70H	Q	70	H	2	0.03635	0.0403	0	0.0871742	9.0101	0.3	0.0871742	9.0101	0.3				108	9	FALSE	FALSE	-1	-1	-1	-1	-1	-1
Alpha	NS3	NS3_R122W	R	122	W	1	0.0612	0.0612	-3	-0.99999	30.0242	3.6	0.99999	30.0242	3.6				0	0	FALSE	FALSE	-1	-1	-1	-1	-1	-1
Alpha	NS3	NS3_R126I	R	126	I	1	0.0811	0.0811	-3	-0.99999	-43.0281	9	0.99999	43.0281	9				1	0	FALSE	FALSE	-1	-1	-1	-1	-1	-1
Alpha	NS3	NS3_R30L	R	30	L	1	0.037	0.037	-2	-0.99999	-43.0281	8.3	0.99999	43.0281	8.3				1232	158	FALSE	FALSE	-1	-1	-1	-1	-1	-1
Alpha	NS3	NS3_R30S	R	30	S	1	0.0819	0.0819	-1	-1.29995	-69.1084	3.7	1.29995	69.1084	3.7				82	9	FALSE	FALSE	-1	-1	-1	-1	-1	-1
Alpha	NS3	NS3_R68I	R	68	I	2	0.56175	0.9918	-3	-0.99999	-43.0281	9	0.99999	43.0281	9				10224	532	FALSE	FALSE	-1	-1	-1	-1	-1	-1
Alpha	NS3	NS3_S117C	S	117	C	1	0.9933	0.9933	-1	0.290054	16.0656	3.3	0.290054	16.0656	3.3				65	2	FALSE	FALSE	-1	-1	-1	-1	-1	-1
Alpha	NS3	NS3_S165F	S	165	F	2	0.6619	0.9944	-2	0.299955	60.0965	3.6	0.299955	60.0965	3.6				8039	1611	FALSE	FALSE	-1	-1	-1	0.811948	0	0
Alpha	NS3	NS3_S166L	S	166	L	2	0.99865	0.9995	-2	0.299955	26.0803	4.6	0.299955	26.0803	4.6				5237	2787	FALSE	FALSE	-1	-1	-1	0.961178	1	1
Alpha	NS3	NS3_S171L	S	171	L	11	0.9909	0.9967	-2	0.299955	26.0803	4.6	0.299955	26.0803	4.6				21866	5354	FALSE	FALSE	0.23488	0	0	0.841472	0	0
Alpha	NS3	NS3_S171V	S	171	V	1	0.0417	0.0417	-2	0.273842	12.0537	5	0.273842	12.0537	5				1	0	FALSE	FALSE	-1	-1	-1	-1	-1	-1
Alpha	NS3	NS3_S177N	S	177	N	1	1	1	1	0.299955	27.0253	-2.7	0.299955	27.0253	2.7				720	37	FALSE	FALSE	-1	-1	-1	-1	-1	-1
Alpha	NS3	NS3_S180P	S	180	P	11	0.993	1	-1	0.498382	10.0379	-0.8	0.498382	10.0379	0.8				261	3063	FALSE	FALSE	0.733495	0	0	0.992496	12	1
Alpha	NS3	NS3_S209P	S	209	P	1	0.0649	0.0649	-1	0.498382	10.0379	-0.8	0.498382	10.0379	0.8				3	4	FALSE	FALSE	-1	-1	-1	-1	-1	-1
Alpha	NS3	NS3_S252L	S	252	L	1	0.8367	0.8367	-2	0.299955	26.0803	4.6	0.299955	26.0803	4.6				1483	10	FALSE	FALSE	-1	-1	-1	-1	-1	-1
Alpha	NS3	NS3_S253P	S	253	P	4	1	1	-1	0.498382	10.0379	-0.8	0.498382	10.0379	0.8				55726	711	FALSE	FALSE	-1	-1	-1	-1	-1	-1
Alpha	NS3	NS3_S26E	S	26	E	1	0.0339	0.0339	0	-0.618082	42.0367	-2.7	0.618082	42.0367	2.7				0	0	FALSE	FALSE	-1	-1	-1	-1	-1	-1
Alpha	NS3	NS3_S26L	S	26	L	3	0.2572	1	-2	0.299955	26.0803	4.6	0.299955	26.0803	4.6				1235019	803	TRUE	TRUE	-1	-1	-1	-1	-1	-1
Alpha	NS3	NS3_S272N	S	272	N	19	0.0773	0.214	1	0.299955	27.0253	-2.7	0.299955	27.0253	2.7				17	0	FALSE	FALSE	0.996552	1	1	-1	-1	-1
Alpha	NS3	NS3_S272T	S	272	T	1	0.0958	0.0958	1	-0.0619499	14.0266	0.1	0.0619499	14.0266	0.1				29	2	FALSE	FALSE	-1	-1	-1	-1	-1	-1
Alpha	NS3	NS3_S40L	S	40	L	2	0.9996	1	-2	0.299955	26.0803	4.6	0.299955	26.0803	4.6				7308	630	FALSE	FALSE	-1	-1	-1	-1	-1	-1
Alpha	NS3	NS3_S58G	S	58	G	1	0.1329	0.1329	0	0.299955	-30.026	0.4	0.299955	30.026	0.4				669	20	FALSE	FALSE	-1	-1	-1	-1	-1	-1
Alpha	NS3	NS3_S58N	S	58	N	5	0.9924	0.9976	1	0.299955	27.0253	-2.7	0.299955	27.0253	2.7				935	1095	FALSE	FALSE	-1	-1	-1	0.928826	2	1
Alpha	NS3	NS3_S60F	S	60	F	3	0.9919	0.9984	-2	0.299955	60.0965	3.6	0.299955	60.0965	3.6				6323	401	FALSE	FALSE	-1	-1	-1	-1	-1	-1
Alpha	NS3	NS3_S74F	S	74	F	5	0.8257	0.9305	-2	0.299955	60.0965	3.6	0.299955	60.0965	3.6				13670	927	FALSE	FALSE	-1	-1	-1	-1	-1	-1
Alpha	NS3	NS3_S92L	S	92	L	3	0.9342	0.9922	-2	0.299955	26.0803	4.6	0.299955	26.0803	4.6				4695	768	FALSE	FALSE	-1	-1	-1	-1	-1	-1
Alpha	NS3	NS3_T12I	T	12	I	1	0.128	0.128	-1	0.361905	12.0537	5.2	0.361905	12.0537	5.2				3306	457	FALSE	FALSE	-1	-1	-1	-1	-1	-1
Alpha	NS3	NS3_T14C	T	14	C	1	0.0406	0.0406	-1	0.352004	2.039	3.2	0.352004	2.039	3.2				4	2	FALSE	FALSE	-1	-1	-1	-1	-1	-1
Alpha	NS3	NS3_T14I	T	14	I	2	0.54545	0.985	-1	0.361905	12.0537	5.2	0.361905	12.0537	5.2				4888	1911	FALSE	FALSE	-1	-1	-1	0.694263	0	0
Alpha	NS3	NS3_T151I	T	151	I	28	0.9993	1	-1	0.361905	12.0537	5.2	0.361905	12.0537	5.2				20304	2947	FALSE	FALSE	0.570239	0	0	0.669572	0	0
Alpha	NS3	NS3_T151N	T	151	N	1	0.998	0.998	0	0.361905	12.9987	-2.8	0.361905	12.9987	2.8				554	130	FALSE	FALSE	-1	-1	-1	-1	-1	-1
Alpha	NS3	NS3_T151P	T	151	P	1	0.0524	0.0524	-1	0.560332	-3.9887	-0.9	0.560332	3.9887	0.9				43	2	FALSE	FALSE	-1	-1	-1	-1	-1	-1
Alpha	NS3	NS3_T170P	T	170	P	2	0.0389	0.0414	-1	0.560332	-3.9887	-0.9	0.560332	3.9887	0.9				6	3	FALSE	FALSE	-1	-1	-1	-1	-1	-1
Alpha	NS3	NS3_T175I	T	175	I	4	0.9685	0.9928	-1	0.361905	12.0537	5.2	0.361905	12.0537	5.2				19012	2258	FALSE	FALSE	-1	-1	-1	0.415411	0	0
Alpha	NS3	NS3_T175R	T	175	R	6	0.04685	0.1667	-1	1.3619	55.0818	-3.8	1.3619	55.0818	3.8				207	21	FALSE	FALSE	0.414893	0	0	-1	-1	-1
Alpha	NS3	NS3_T176I	T	176	I	1	0.9733	0.9733	-1	0.361905	12.0537	5.2	0.361905	12.0537	5.2				4995	919	FALSE	FALSE	-1	-1	-1	-1	-1	-1
Alpha	NS3	NS3_T217I	T	217	I	11	0.0366	1	-1	0.361905	12.0537	5.2	0.361905	12.0537	5.2				2343	185	FALSE	FALSE	0.350305	0	0	-1	-1	-1
Alpha	NS3	NS3_T217P	T	217	P	1	0.9936	0.9936	-1	0.560332	-3.9887	-0.9	0.560332	3.9887	0.9				16	1	FALSE	FALSE	-1	-1	-1	-1	-1	-1
Alpha	NS3	NS3_T223F	T	223	F	1	0.9774	0.9774	-2	0.361905	46.0699	3.5	0.361905	46.0699	3.5				102	1	FALSE	FALSE	-1	-1	-1	-1	-1	-1
Alpha	NS3	NS3_T223I	T	223	I	31	0.9919	1	-1	0.361905	12.0537	5.2	0.361905	12.0537	5.2				3514268	11515	TRUE	TRUE	0.642436	0	0	0.987806	4	1
Alpha	NS3	NS3_T223N	T	223	N	1	0.8859	0.8859	0	0.361905	12.9987	-2.8	0.361905	12.9987	2.8				567	339	FALSE	FALSE	-1	-1	-1	-1	-1	-1
Alpha	NS3	NS3_T248A	T	248	A	1	0.0861	0.0861	0	0.397678	-30.026	2.5	0.397678	30.026	2.5				146	7	FALSE	FALSE	-1	-1	-1	-1	-1	-1
Alpha	NS3	NS3_T269M	T	269	M	2	0.9225	0.9991	-1	0.102158	30.0921	2.6	0.102158	30.0921	2.6				4050	297	FALSE	FALSE	-1	-1	-1	-1	-1	-1
Alpha	NS3	NS3_T270I	T	270	I	1	0.7923	0.7923	-1	0.361905	12.0537	5.2	0.361905	12.0537	5.2				2766	105	FALSE	FALSE	-1	-1	-1	-1	-1	-1
Alpha	NS3	NS3_T271I	T	271	I	19	0.1064	0.2711	-1	0.361905	12.0537	5.2	0.361905	12.0537	5.2				1391	111	FALSE	FALSE	0.996552	1	1	-1	-1	-1
Alpha	NS3	NS3_T32I	T	32	I	1	0.033	0.033	-1	0.361905	12.0537	5.2	0.361905	12.0537	5.2				3151	704	FALSE	FALSE	-1	-1	-1	-1	-1	-1
Alpha	NS3	NS3_T64I	T	64	I	1	0.9484	0.9484	-1	0.361905	12.0537	5.2	0.361905	12.0537	5.2				3130	605	FALSE	FALSE	-1	-1	-1	-1	-1	-1
Alpha	NS3	NS3_T89I	T	89	I	3	0.5813	0.9867	-1	0.361905	12.0537	5.2	0.361905	12.0537	5.2				20884	785	FALSE	FALSE	-1	-1	-1	-1	-1	-1
Alpha	NS3	NS3_T9A	T	9	A	1	0.0433	0.0433	0	0.397678	-30.026	2.5	0.397678	30.026	2.5				186	5	FALSE	FALSE	-1	-1	-1	-1	-1	-1
Alpha	NS3	NS3_T9I	T	9	I	1	0.0435	0.0435	-1	0.361905	12.0537	5.2	0.361905	12.0537	5.2				230	61	FALSE	FALSE	-1	-1	-1	-1	-1	-1
Alpha	NS3	NS3_V112F	V	112	F	6	1	1	-1	0.0261132	48.0428	-1.4	0.0261132	48.0428	1.4				5370	1450	FALSE	FALSE	0.544105	0	0	0.865687	0	0
Alpha	NS3	NS3_V13G	V	13	G	1	0.1661	0.1661	-3	0.0261132	-42.0797	-4.6	0.0261132	42.0797	4.6				7	1	FALSE	FALSE	-1	-1	-1	-1	-1	-1
Alpha	NS3	NS3_V13L	V	13	L	2	0.98955	0.996	1	0.0261132	14.0266	-0.4	0.0261132	14.0266	0.4				12069	3286	FALSE	FALSE	-1	-1	-1	0.947317	2	1
Alpha	NS3	NS3_V163L	V	163	L	1	0.995	0.995	1	0.0261132	14.0266	-0.4	0.0261132	14.0266	0.4				744	191	FALSE	FALSE	-1	-1	-1	-1	-1	-1
Alpha	NS3	NS3_V201F	V	201	F	1	0.1234	0.1234	-1	0.0261132	48.0428	-1.4	0.0261132	48.0428	1.4				563	3	FALSE	FALSE	-1	-1	-1	-1	-1	-1
Alpha	NS3	NS3_V201L	V	201	L	2	0.0713	0.1078	1	0.0261132	14.0266	-0.4	0.0261132	14.0266	0.4				51	2	FALSE	FALSE	-1	-1	-1	-1	-1	-1
Alpha	NS3	NS3_V202L	V	202	L	7	0.9899	1	1	0.0261132	14.0266	-0.4	0.0261132	14.0266	0.4				12816	7493	FALSE	FALSE	0.365124	0	0	0.990041	4	1
Alpha	NS3	NS3_V225F	V	225	F	1	0.986	0.986	-1	0.0261132	48.0428	-1.4	0.0261132	48.0428	1.4				3138	237	FALSE	FALSE	-1	-1	-1	-1	-1	-1
Alpha	NS3	NS3_V255G	V	255	G	1	0.0307	0.0307	-3	0.0261132	-42.0797	-4.6	0.0261132	42.0797	4.6				2	1	FALSE	FALSE	-1	-1	-1	-1	-1	-1
Alpha	NS3	NS3_V255Y	V	255	Y	1	0.2441	0.2441	-1	0.0251142	64.0422	-5.5	0.0251142	64.0422	5.5				1	0	FALSE	FALSE	-1	-1	-1	-1	-1	-1
Alpha	NS3	NS3_V256D	V	256	D	1	0.2238	0.2238	-3	-0.969585	15.9564	-7.7	0.969585	15.9564	7.7				2	0	FALSE	FALSE	-1	-1	-1	-1	-1	-1
Alpha	NS3	NS3_V256I	V	256	I	1	0.0765	0.0765	3	0.0261132	14.0266	0.3	0.0261132	14.0266	0.3				11163	751	FALSE	FALSE	-1	-1	-1	-1	-1	-1
Alpha	NS3	NS3_V259P	V	259	P	1	0.0458	0.0458	-2	0.22454	-2.0158	-5.8	0.22454	2.0158	5.8				0	0	FALSE	FALSE	-1	-1	-1	-1	-1	-1
Alpha	NS3	NS3_V48F	V	48	F	1	0.0342	0.0342	-1	0.0261132	48.0428	-1.4	0.0261132	48.0428	1.4				7463	168	FALSE	FALSE	-1	-1	-1	-1	-1	-1
Alpha	NS3	NS3_V48G	V	48	G	1	0.0366	0.0366	-3	0.0261132	-42.0797	-4.6	0.0261132	42.0797	4.6				49	38	FALSE	FALSE	-1	-1	-1	-1	-1	-1
Alpha	NS3	NS3_V50A	V	50	A	1	0.0313	0.0313	0	0.0618862	-28.0531	-2.4	0.0618862	28.0531	2.4				175	92	FALSE	FALSE	-1	-1	-1	-1	-1	-1
Alpha	NS3	NS3_V50I	V	50	I	1	0.1351	0.1351	3	0.0261132	14.0266	0.3	0.0261132	14.0266	0.3				3541	223	FALSE	FALSE	-1	-1	-1	-1	-1	-1
Alpha	NS3	NS3_V55F	V	55	F	1	0.9905	0.9905	-1	0.0261132	48.0428	-1.4	0.0261132	48.0428	1.4				3383	559	FALSE	FALSE	-1	-1	-1	-1	-1	-1
Alpha	NS3	NS3_V88L	V	88	L	9	0.9413	1	1	0.0261132	14.0266	-0.4	0.0261132	14.0266	0.4				3668	729	FALSE	FALSE	0.879167	0	0	-1	-1	-1
Alpha	NS3	NS3_V90F	V	90	F	5	0.5654	0.6503	-1	0.0261132	48.0428	-1.4	0.0261132	48.0428	1.4				3395	710	FALSE	FALSE	-1	-1	-1	-1	-1	-1
Alpha	NS3	NS3_V90L	V	90	L	1	0.6081	0.6081	1	0.0261132	14.0266	-0.4	0.0261132	14.0266	0.4				726	155	FALSE	FALSE	-1	-1	-1	-1	-1	-1
Alpha	NS3	NS3_V97I	V	97	I	1	0.9986	0.9986	3	0.0261132	14.0266	0.3	0.0261132	14.0266	0.3				5470	84	FALSE	FALSE	-1	-1	-1	-1	-1	-1
Alpha	NS3	NS3_W128C	W	128	C	2	0.54335	1	-2	-0.00990099	-83.067	3.4	0.00990099	83.067	3.4				1244	239	FALSE	FALSE	-1	-1	-1	-1	-1	-1
Alpha	NS3	NS3_W128L	W	128	L	2	0.9569	0.9948	-2	0	-73.0523	4.7	0	73.0523	4.7				4711	207	FALSE	FALSE	-1	-1	-1	-1	-1	-1
Alpha	NS3	NS3_W131C	W	131	C	2	0.51945	0.9966	-2	-0.00990099	-83.067	3.4	0.00990099	83.067	3.4				27267	2956	FALSE	FALSE	-1	-1	-1	0.721821	0	0
Alpha	NS3	NS3_W131L	W	131	L	2	0.51955	1	-2	0	-73.0523	4.7	0	73.0523	4.7				2696	690	FALSE	FALSE	-1	-1	-1	-1	-1	-1
Alpha	NS3	NS3_W149G	W	149	G	1	0.9953	0.9953	-2	0	-129.159	0.5	0	129.159	0.5				61	10	FALSE	FALSE	-1	-1	-1	-1	-1	-1
Alpha	NS3	NS3_W193C	W	193	C	1	0.989	0.989	-2	-0.00990099	-83.067	3.4	0.00990099	83.067	3.4				682	279	FALSE	FALSE	-1	-1	-1	-1	-1	-1
Alpha	NS3	NS3_W193L	W	193	L	2	0.5288	1	-2	0	-73.0523	4.7	0	73.0523	4.7				916	444	FALSE	FALSE	-1	-1	-1	-1	-1	-1
Alpha	NS3	NS3_W45L	W	45	L	4	0.99325	1	-2	0	-73.0523	4.7	0	73.0523	4.7				3269	715	FALSE	FALSE	-1	-1	-1	-1	-1	-1
Alpha	NS3	NS3_W45T	W	45	T	1	0.035	0.035	-2	-0.361905	-85.106	0.2	0.361905	85.106	0.2				1	0	FALSE	FALSE	-1	-1	-1	-1	-1	-1
Alpha	NS3	NS3_W69C	W	69	C	1	1	1	-2	-0.00990099	-83.067	3.4	0.00990099	83.067	3.4				5897	433	FALSE	FALSE	-1	-1	-1	-1	-1	-1
Alpha	NS3	NS3_W69L	W	69	L	3	0.988	0.9938	-2	0	-73.0523	4.7	0	73.0523	4.7				1317	731	FALSE	FALSE	-1	-1	-1	-1	-1	-1
Alpha	NS3	NS3_Y107H	Y	107	H	1	1	1	2	0.0881732	-26.0339	-1.9	0.0881732	26.0339	1.9				3278	427	FALSE	FALSE	-1	-1	-1	-1	-1	-1
Alpha	NS3	NS3_Y107S	Y	107	S	1	0.0467	0.0467	-2	-0.298956	-76.0959	0.5	0.298956	76.0959	0.5				609	14	FALSE	FALSE	-1	-1	-1	-1	-1	-1
Alpha	NS3	NS3_Y109S	Y	109	S	1	0.0376	0.0376	-2	-0.298956	-76.0959	0.5	0.298956	76.0959	0.5				8	0	FALSE	FALSE	-1	-1	-1	-1	-1	-1
Alpha	NS3	NS3_Y145H	Y	145	H	1	0.0385	0.0385	2	0.0881732	-26.0339	-1.9	0.0881732	26.0339	1.9				504	28	FALSE	FALSE	-1	-1	-1	-1	-1	-1
Alpha	NS3	NS3_Y184N	Y	184	N	1	0.9996	0.9996	-2	0.000999001	-49.0706	-2.2	0.000999001	49.0706	2.2				59	1	FALSE	FALSE	-1	-1	-1	-1	-1	-1
Alpha	NS3	NS3_Y189C	Y	189	C	1	1	1	-2	-0.00890199	-60.0303	3.8	0.00890199	60.0303	3.8				1141	137	FALSE	FALSE	-1	-1	-1	-1	-1	-1
Alpha	NS3	NS3_Y189H	Y	189	H	1	0.0563	0.0563	2	0.0881732	-26.0339	-1.9	0.0881732	26.0339	1.9				198	18	FALSE	FALSE	-1	-1	-1	-1	-1	-1
Alpha	NS3	NS3_Y206S	Y	206	S	1	0.0524	0.0524	-2	-0.298956	-76.0959	0.5	0.298956	76.0959	0.5				1	8	FALSE	FALSE	-1	-1	-1	-1	-1	-1
Alpha	NS3	NS3_Y211H	Y	211	H	1	0.0369	0.0369	2	0.0881732	-26.0339	-1.9	0.0881732	26.0339	1.9				470	28	FALSE	FALSE	-1	-1	-1	-1	-1	-1
Alpha	NS3	NS3_Y264P	Y	264	P	1	0.0325	0.0325	-3	0.199426	-66.058	-0.3	0.199426	66.058	0.3				0	0	FALSE	FALSE	-1	-1	-1	-1	-1	-1
Alpha	NS6	NS6_D30Y	D	30	Y	1	0.1232	0.1232	-3	0.994699	48.0858	2.2	0.994699	48.0858	2.2				131	39	FALSE	FALSE	-1	-1	-1	-1	-1	-1
Alpha	NS6	NS6_D53G	D	53	G	2	0.9985	0.9986	-1	0.995698	-58.0361	3.1	0.995698	58.0361	3.1				187	71	FALSE	FALSE	-1	-1	-1	-1	-1	-1
Alpha	NS6	NS6_D6V	D	6	V	1	0.0339	0.0339	-3	0.969585	-15.9564	7.7	0.969585	15.9564	7.7				1	5	FALSE	FALSE	-1	-1	-1	-1	-1	-1
Alpha	NS6	NS6_E13D	E	13	D	1	0.992	0.992	2	-0.0776616	-14.0266	0	0.0776616	14.0266	0				673	182	FALSE	FALSE	-1	-1	-1	-1	-1	-1
Alpha	NS6	NS6_E13K	E	13	K	1	0.0337	0.0337	1	1.91704	-0.9417	-0.4	1.91704	0.9417	0.4				50	5	FALSE	FALSE	-1	-1	-1	-1	-1	-1
Alpha	NS6	NS6_E55D	E	55	D	3	0.0407	0.0611	2	-0.0776616	-14.0266	0	0.0776616	14.0266	0				1536	88	FALSE	FALSE	-1	-1	-1	-1	-1	-1
Alpha	NS6	NS6_E55Q	E	55	Q	1	0.0791	0.0791	2	0.918037	-0.9848	0	0.918037	0.9848	0				521	28	FALSE	FALSE	-1	-1	-1	-1	-1	-1
Alpha	NS6	NS6_E59N	E	59	N	1	0.0339	0.0339	0	0.918037	-15.0114	0	0.918037	15.0114	0				0	0	FALSE	FALSE	-1	-1	-1	-1	-1	-1
Alpha	NS6	NS6_E59Q	E	59	Q	1	0.0493	0.0493	2	0.918037	-0.9848	0	0.918037	0.9848	0				13	5	FALSE	FALSE	-1	-1	-1	-1	-1	-1
Alpha	NS6	NS6_F22Y	F	22	Y	1	0.0686	0.0686	3	-0.000999001	15.9994	-4.1	0.000999001	15.9994	4.1				127	2	FALSE	FALSE	-1	-1	-1	-1	-1	-1
Alpha	NS6	NS6_F2H	F	2	H	2	0.0486	0.0491	-1	0.0871742	-10.0345	-6	0.0871742	10.0345	6				0	0	FALSE	FALSE	-1	-1	-1	-1	-1	-1
Alpha	NS6	NS6_F2S	F	2	S	1	0.0537	0.0537	-2	-0.299955	-60.0965	-3.6	0.299955	60.0965	3.6				885	173	FALSE	FALSE	-1	-1	-1	-1	-1	-1
Alpha	NS6	NS6_F7L	F	7	L	1	0.0482	0.0482	0	0	-34.0162	1	0	34.0162	1				648	224	FALSE	FALSE	-1	-1	-1	-1	-1	-1
Alpha	NS6	NS6_F7V	F	7	V	1	0.0467	0.0467	-1	-0.0261132	-48.0428	1.4	0.0261132	48.0428	1.4				96	5	FALSE	FALSE	-1	-1	-1	-1	-1	-1
Alpha	NS6	NS6_F7Y	F	7	Y	1	0.0321	0.0321	3	-0.000999001	15.9994	-4.1	0.000999001	15.9994	4.1				178	16	FALSE	FALSE	-1	-1	-1	-1	-1	-1
Alpha	NS6	NS6_H3Y	H	3	Y	1	0.1174	0.1174	2	-0.0881732	26.0339	1.9	0.0881732	26.0339	1.9				1058	161	FALSE	FALSE	-1	-1	-1	-1	-1	-1
Alpha	NS6	NS6_I14T	I	14	T	3	0.9977	1	-1	-0.361905	-12.0537	-5.2	0.361905	12.0537	5.2				345	241	FALSE	FALSE	-1	-1	-1	-1	-1	-1
Alpha	NS6	NS6_I17L	I	17	L	1	1	1	2	0	0	-0.7	0	0	0.7				121	148	FALSE	FALSE	-1	-1	-1	-1	-1	-1
Alpha	NS6	NS6_I26N	I	26	N	1	0.0841	0.0841	-3	0	0.945	-8	0	0.945	8				29	1	FALSE	FALSE	-1	-1	-1	-1	-1	-1
Alpha	NS6	NS6_I26T	I	26	T	1	0.0898	0.0898	-1	-0.361905	-12.0537	-5.2	0.361905	12.0537	5.2				242	5	FALSE	FALSE	-1	-1	-1	-1	-1	-1
Alpha	NS6	NS6_I26V	I	26	V	2	0.9913	0.9947	3	-0.0261132	-14.0266	-0.3	0.0261132	14.0266	0.3				1569	53	FALSE	FALSE	-1	-1	-1	-1	-1	-1
Alpha	NS6	NS6_I33T	I	33	T	1	0.9962	0.9962	-1	-0.361905	-12.0537	-5.2	0.361905	12.0537	5.2				2269	4920	FALSE	FALSE	-1	-1	-1	0.953504	3	1
Alpha	NS6	NS6_I36V	I	36	V	1	0.999	0.999	3	-0.0261132	-14.0266	-0.3	0.0261132	14.0266	0.3				217	11	FALSE	FALSE	-1	-1	-1	-1	-1	-1
Alpha	NS6	NS6_K23T	K	23	T	1	0.0309	0.0309	-1	-1.36091	-27.0684	3.2	1.36091	27.0684	3.2				36	4	FALSE	FALSE	-1	-1	-1	-1	-1	-1
Alpha	NS6	NS6_K42N	K	42	N	3	0.0634	1	0	-0.999001	-14.0697	0.4	0.999001	14.0697	0.4				1182	208	FALSE	FALSE	-1	-1	-1	-1	-1	-1
Alpha	NS6	NS6_K48I	K	48	I	1	0.0353	0.0353	-3	-0.999001	-15.0147	8.4	0.999001	15.0147	8.4				59	9	FALSE	FALSE	-1	-1	-1	-1	-1	-1
Alpha	NS6	NS6_L16P	L	16	P	1	0.0455	0.0455	-3	0.198427	-16.0424	-5.4	0.198427	16.0424	5.4				36	2	FALSE	FALSE	-1	-1	-1	-1	-1	-1
Alpha	NS6	NS6_L29T	L	29	T	1	0.0765	0.0765	-1	-0.361905	-12.0537	-4.5	0.361905	12.0537	4.5				8	1	FALSE	FALSE	-1	-1	-1	-1	-1	-1
Alpha	NS6	NS6_L44V	L	44	V	1	0.032	0.032	1	-0.0261132	-14.0266	0.4	0.0261132	14.0266	0.4				1	2	FALSE	FALSE	-1	-1	-1	-1	-1	-1
Alpha	NS6	NS6_M19I	M	19	I	1	1	1	1	0.259747	-18.0384	2.6	0.259747	18.0384	2.6				308	128	FALSE	FALSE	-1	-1	-1	-1	-1	-1
Alpha	NS6	NS6_M1V	M	1	V	1	0.0506	0.0506	1	0.233634	-32.065	2.3	0.233634	32.065	2.3				63	7	FALSE	FALSE	-1	-1	-1	-1	-1	-1
Alpha	NS6	NS6_M58I	M	58	I	1	0.0433	0.0433	1	0.259747	-18.0384	2.6	0.259747	18.0384	2.6				365	57	FALSE	FALSE	-1	-1	-1	-1	-1	-1
Alpha	NS6	NS6_M58K	M	58	K	1	0.0337	0.0337	-1	1.25875	-3.0237	-5.8	1.25875	3.0237	5.8				233	25	FALSE	FALSE	-1	-1	-1	-1	-1	-1
Alpha	NS6	NS6_M58L	M	58	L	38	0.05745	0.8485	2	0.259747	-18.0384	1.9	0.259747	18.0384	1.9				830	16	FALSE	FALSE	0.780411	0	0	-1	-1	-1
Alpha	NS6	NS6_M58V	M	58	V	1	0.0348	0.0348	1	0.233634	-32.065	2.3	0.233634	32.065	2.3				208	17	FALSE	FALSE	-1	-1	-1	-1	-1	-1
Alpha	NS6	NS6_N28R	N	28	R	1	0.0687	0.0687	0	0.99999	42.0831	-1	0.99999	42.0831	1				14	0	FALSE	FALSE	-1	-1	-1	-1	-1	-1
Alpha	NS6	NS6_N28Y	N	28	Y	1	0.0687	0.0687	-2	-0.000999001	49.0706	2.2	0.000999001	49.0706	2.2				25	7	FALSE	FALSE	-1	-1	-1	-1	-1	-1
Alpha	NS6	NS6_N39D	N	39	D	1	0.9976	0.9976	1	-0.995698	0.9848	0	0.995698	0.9848	0				171	3	FALSE	FALSE	-1	-1	-1	-1	-1	-1
Alpha	NS6	NS6_N47Y	N	47	Y	1	0.0468	0.0468	-2	-0.000999001	49.0706	2.2	0.000999001	49.0706	2.2				42	0	FALSE	FALSE	-1	-1	-1	-1	-1	-1
Alpha	NS6	NS6_P57L	P	57	L	3	0.0377	0.0575	-3	-0.198427	16.0424	5.4	0.198427	16.0424	5.4				11283	257	FALSE	FALSE	-1	-1	-1	-1	-1	-1
Alpha	NS6	NS6_P57Q	P	57	Q	1	0.0335	0.0335	-1	-0.198427	31.014	-1.9	0.198427	31.014	1.9				111	0	FALSE	FALSE	-1	-1	-1	-1	-1	-1
Alpha	NS6	NS6_P57S	P	57	S	4	0.03415	0.0361	-1	-0.498382	-10.0379	0.8	0.498382	10.0379	0.8				822	11	FALSE	FALSE	-1	-1	-1	-1	-1	-1
Alpha	NS6	NS6_P57T	P	57	T	1	0.034	0.034	-1	-0.560332	3.9887	0.9	0.560332	3.9887	0.9				48	0	FALSE	FALSE	-1	-1	-1	-1	-1	-1
Alpha	NS6	NS6_Q51L	Q	51	L	1	0.0397	0.0397	-2	0	-14.9716	7.3	0	14.9716	7.3				330	39	FALSE	FALSE	-1	-1	-1	-1	-1	-1
Alpha	NS6	NS6_Q56H	Q	56	H	1	0.0438	0.0438	0	0.0871742	9.0101	0.3	0.0871742	9.0101	0.3				7	0	FALSE	FALSE	-1	-1	-1	-1	-1	-1
Alpha	NS6	NS6_Q56L	Q	56	L	1	0.03	0.03	-2	0	-14.9716	7.3	0	14.9716	7.3				154	12	FALSE	FALSE	-1	-1	-1	-1	-1	-1
Alpha	NS6	NS6_Q56P	Q	56	P	1	0.0433	0.0433	-1	0.198427	-31.014	1.9	0.198427	31.014	1.9				11	0	FALSE	FALSE	-1	-1	-1	-1	-1	-1
Alpha	NS6	NS6_S25T	S	25	T	1	0.0707	0.0707	1	-0.0619499	14.0266	0.1	0.0619499	14.0266	0.1				26	0	FALSE	FALSE	-1	-1	-1	-1	-1	-1
Alpha	NS6	NS6_S43T	S	43	T	2	0.0432	0.0467	1	-0.0619499	14.0266	0.1	0.0619499	14.0266	0.1				1	2	FALSE	FALSE	-1	-1	-1	-1	-1	-1
Alpha	NS6	NS6_T10A	T	10	A	1	0.9968	0.9968	0	0.397678	-30.026	2.5	0.397678	30.026	2.5				23	2	FALSE	FALSE	-1	-1	-1	-1	-1	-1
Alpha	NS6	NS6_T10I	T	10	I	1	0.0606	0.0606	-1	0.361905	12.0537	5.2	0.361905	12.0537	5.2				1032	97	FALSE	FALSE	-1	-1	-1	-1	-1	-1
Alpha	NS6	NS6_T21I	T	21	I	1	0.2081	0.2081	-1	0.361905	12.0537	5.2	0.361905	12.0537	5.2				2986	257	FALSE	FALSE	-1	-1	-1	-1	-1	-1
Alpha	NS6	NS6_T45I	T	45	I	1	0.0385	0.0385	-1	0.361905	12.0537	5.2	0.361905	12.0537	5.2				617	45	FALSE	FALSE	-1	-1	-1	-1	-1	-1
Alpha	NS6	NS6_T45N	T	45	N	1	1	1	0	0.361905	12.9987	-2.8	0.361905	12.9987	2.8				146	57	FALSE	FALSE	-1	-1	-1	-1	-1	-1
Alpha	NS6	NS6_V24F	V	24	F	2	0.519	0.9718	-1	0.0261132	48.0428	-1.4	0.0261132	48.0428	1.4				1268	282	FALSE	FALSE	-1	-1	-1	-1	-1	-1
Alpha	NS6	NS6_V5D	V	5	D	1	0.0442	0.0442	-3	-0.969585	15.9564	-7.7	0.969585	15.9564	7.7				1	0	FALSE	FALSE	-1	-1	-1	-1	-1	-1
Alpha	NS6	NS6_V9L	V	9	L	1	0.0393	0.0393	1	0.0261132	14.0266	-0.4	0.0261132	14.0266	0.4				31	0	FALSE	FALSE	-1	-1	-1	-1	-1	-1
Alpha	NS6	NS6_W27L	W	27	L	2	0.04085	0.0446	-2	0	-73.0523	4.7	0	73.0523	4.7				4128	760	FALSE	FALSE	-1	-1	-1	-1	-1	-1
Alpha	NS6	NS6_W27M	W	27	M	1	0.0632	0.0632	-1	-0.259747	-55.0139	2.8	0.259747	55.0139	2.8				0	0	FALSE	FALSE	-1	-1	-1	-1	-1	-1
Alpha	NS6	NS6_W27Y	W	27	Y	1	0.0713	0.0713	2	-0.000999001	-23.0367	-0.4	0.000999001	23.0367	0.4				286	2	FALSE	FALSE	-1	-1	-1	-1	-1	-1
Alpha	NS6	NS6_Y49C	Y	49	C	1	0.4239	0.4239	-2	-0.00890199	-60.0303	3.8	0.00890199	60.0303	3.8				552	27	FALSE	FALSE	-1	-1	-1	-1	-1	-1
Alpha	NS7a	NS7a_A105S	A	105	S	2	0.5558	0.9829	1	-0.335728	15.9994	-2.6	0.335728	15.9994	2.6				2802	138	FALSE	FALSE	-1	-1	-1	-1	-1	-1
Alpha	NS7a	NS7a_A105V	A	105	V	1	0.0467	0.0467	0	-0.0618862	28.0531	2.4	0.0618862	28.0531	2.4				6410	543	FALSE	FALSE	-1	-1	-1	-1	-1	-1
Alpha	NS7a	NS7a_A50S	A	50	S	1	0.9911	0.9911	1	-0.335728	15.9994	-2.6	0.335728	15.9994	2.6				1721	70	FALSE	FALSE	-1	-1	-1	-1	-1	-1
Alpha	NS7a	NS7a_A50T	A	50	T	1	0.0653	0.0653	0	-0.397678	30.026	-2.5	0.397678	30.026	2.5				287	30	FALSE	FALSE	-1	-1	-1	-1	-1	-1
Alpha	NS7a	NS7a_A66V	A	66	V	1	0.0504	0.0504	0	-0.0618862	28.0531	2.4	0.0618862	28.0531	2.4				1937	75	FALSE	FALSE	-1	-1	-1	-1	-1	-1
Alpha	NS7a	NS7a_C113Y	C	113	Y	1	0.1167	0.1167	-2	0.00890199	60.0303	-3.8	0.00890199	60.0303	3.8				152	6	FALSE	FALSE	-1	-1	-1	-1	-1	-1
Alpha	NS7a	NS7a_C15W	C	15	W	1	0.0856	0.0856	-2	0.00990099	83.067	-3.4	0.00990099	83.067	3.4				11	0	FALSE	FALSE	-1	-1	-1	-1	-1	-1
Alpha	NS7a	NS7a_C23S	C	23	S	1	0.078	0.078	-1	-0.290054	-16.0656	-3.3	0.290054	16.0656	3.3				48	6	FALSE	FALSE	-1	-1	-1	-1	-1	-1
Alpha	NS7a	NS7a_C35F	C	35	F	1	0.11	0.11	-2	0.00990099	44.0309	0.3	0.00990099	44.0309	0.3				277	21	FALSE	FALSE	-1	-1	-1	-1	-1	-1
Alpha	NS7a	NS7a_D69V	D	69	V	1	0.0342	0.0342	-3	0.969585	-15.9564	7.7	0.969585	15.9564	7.7				24	0	FALSE	FALSE	-1	-1	-1	-1	-1	-1
Alpha	NS7a	NS7a_E22D	E	22	D	1	0.9961	0.9961	2	-0.0776616	-14.0266	0	0.0776616	14.0266	0				3779	190	FALSE	FALSE	-1	-1	-1	-1	-1	-1
Alpha	NS7a	NS7a_E41H	E	41	H	1	0.5455	0.5455	0	1.00521	8.0253	0.3	1.00521	8.0253	0.3				13	1	FALSE	FALSE	-1	-1	-1	-1	-1	-1
Alpha	NS7a	NS7a_E41N	E	41	N	1	0.4242	0.4242	0	0.918037	-15.0114	0	0.918037	15.0114	0				0	2	FALSE	FALSE	-1	-1	-1	-1	-1	-1
Alpha	NS7a	NS7a_E91D	E	91	D	1	0.9991	0.9991	2	-0.0776616	-14.0266	0	0.0776616	14.0266	0				1874	42	FALSE	FALSE	-1	-1	-1	-1	-1	-1
Alpha	NS7a	NS7a_E91V	E	91	V	1	0.037	0.037	-2	0.891923	-29.983	7.7	0.891923	29.983	7.7				22	2	FALSE	FALSE	-1	-1	-1	-1	-1	-1
Alpha	NS7a	NS7a_E92C	E	92	C	1	0.0707	0.0707	-4	0.908136	-25.9711	6	0.908136	25.9711	6				2	0	FALSE	FALSE	-1	-1	-1	-1	-1	-1
Alpha	NS7a	NS7a_E92D	E	92	D	1	0.0375	0.0375	2	-0.0776616	-14.0266	0	0.0776616	14.0266	0				3043	64	FALSE	FALSE	-1	-1	-1	-1	-1	-1
Alpha	NS7a	NS7a_E95Q	E	95	Q	1	0.9915	0.9915	2	0.918037	-0.9848	0	0.918037	0.9848	0				1357	158	FALSE	FALSE	-1	-1	-1	-1	-1	-1
Alpha	NS7a	NS7a_F101L	F	101	L	3	0.0496	0.0707	0	0	-34.0162	1	0	34.0162	1				2739	112	FALSE	FALSE	-1	-1	-1	-1	-1	-1
Alpha	NS7a	NS7a_F101N	F	101	N	2	0.32605	0.3711	-3	0	-33.0712	-6.3	0	33.0712	6.3				8	4	FALSE	FALSE	-1	-1	-1	-1	-1	-1
Alpha	NS7a	NS7a_F63Y	F	63	Y	1	0.5448	0.5448	3	-0.000999001	15.9994	-4.1	0.000999001	15.9994	4.1				305	9	FALSE	FALSE	-1	-1	-1	-1	-1	-1
Alpha	NS7a	NS7a_F6I	F	6	I	1	0.9994	0.9994	0	0	-34.0162	1.7	0	34.0162	1.7				134	1	FALSE	FALSE	-1	-1	-1	-1	-1	-1
Alpha	NS7a	NS7a_F6L	F	6	L	1	0.9991	0.9991	0	0	-34.0162	1	0	34.0162	1				2213	770	FALSE	FALSE	-1	-1	-1	-1	-1	-1
Alpha	NS7a	NS7a_F87S	F	87	S	1	0.0368	0.0368	-2	-0.299955	-60.0965	-3.6	0.299955	60.0965	3.6				182	12	FALSE	FALSE	-1	-1	-1	-1	-1	-1
Alpha	NS7a	NS7a_G26V	G	26	V	1	0.0498	0.0498	-3	-0.0261132	42.0797	4.6	0.0261132	42.0797	4.6				72	3	FALSE	FALSE	-1	-1	-1	-1	-1	-1
Alpha	NS7a	NS7a_G38A	G	38	A	3	0.9355	0.9547	0	0.035773	14.0266	2.2	0.035773	14.0266	2.2				1066	54	FALSE	FALSE	-1	-1	-1	-1	-1	-1
Alpha	NS7a	NS7a_G38I	G	38	I	1	0.0417	0.0417	-4	0	56.1063	4.9	0	56.1063	4.9				0	0	FALSE	FALSE	-1	-1	-1	-1	-1	-1
Alpha	NS7a	NS7a_G38V	G	38	V	2	0.07625	0.089	-3	-0.0261132	42.0797	4.6	0.0261132	42.0797	4.6				6224	368	FALSE	FALSE	-1	-1	-1	-1	-1	-1
Alpha	NS7a	NS7a_G70S	G	70	S	1	0.0338	0.0338	0	-0.299955	30.026	-0.4	0.299955	30.026	0.4				1607	101	FALSE	FALSE	-1	-1	-1	-1	-1	-1
Alpha	NS7a	NS7a_H19Q	H	19	Q	1	0.0319	0.0319	0	-0.0871742	-9.0101	-0.3	0.0871742	9.0101	0.3				1083	9	FALSE	FALSE	-1	-1	-1	-1	-1	-1
Alpha	NS7a	NS7a_H19Y	H	19	Y	2	0.1259	0.1461	2	-0.0881732	26.0339	1.9	0.0881732	26.0339	1.9				114	3	FALSE	FALSE	-1	-1	-1	-1	-1	-1
Alpha	NS7a	NS7a_H47Y	H	47	Y	2	0.67005	0.9756	2	-0.0881732	26.0339	1.9	0.0881732	26.0339	1.9				67149	611	FALSE	FALSE	-1	-1	-1	-1	-1	-1
Alpha	NS7a	NS7a_H73Y	H	73	Y	2	0.99185	1	2	-0.0881732	26.0339	1.9	0.0881732	26.0339	1.9				10107	516	FALSE	FALSE	-1	-1	-1	-1	-1	-1
Alpha	NS7a	NS7a_I100K	I	100	K	1	0.4798	0.4798	-3	0.999001	15.0147	-8.4	0.999001	15.0147	8.4				3	0	FALSE	FALSE	-1	-1	-1	-1	-1	-1
Alpha	NS7a	NS7a_I100T	I	100	T	2	0.16955	0.2691	-1	-0.361905	-12.0537	-5.2	0.361905	12.0537	5.2				896	61	FALSE	FALSE	-1	-1	-1	-1	-1	-1
Alpha	NS7a	NS7a_I100V	I	100	V	1	0.0628	0.0628	3	-0.0261132	-14.0266	-0.3	0.0261132	14.0266	0.3				342	10	FALSE	FALSE	-1	-1	-1	-1	-1	-1
Alpha	NS7a	NS7a_I103A	I	103	A	2	0.8218	0.826	-1	0.035773	-42.0797	-2.7	0.035773	42.0797	2.7				1	0	FALSE	FALSE	-1	-1	-1	-1	-1	-1
Alpha	NS7a	NS7a_I103K	I	103	K	1	0.0557	0.0557	-3	0.999001	15.0147	-8.4	0.999001	15.0147	8.4				2	0	FALSE	FALSE	-1	-1	-1	-1	-1	-1
Alpha	NS7a	NS7a_I103N	I	103	N	2	0.1134	0.1294	-3	0	0.945	-8	0	0.945	8				83	2	FALSE	FALSE	-1	-1	-1	-1	-1	-1
Alpha	NS7a	NS7a_I4V	I	4	V	1	0.0826	0.0826	3	-0.0261132	-14.0266	-0.3	0.0261132	14.0266	0.3				944	39	FALSE	FALSE	-1	-1	-1	-1	-1	-1
Alpha	NS7a	NS7a_I88V	I	88	V	1	0.0529	0.0529	3	-0.0261132	-14.0266	-0.3	0.0261132	14.0266	0.3				626	103	FALSE	FALSE	-1	-1	-1	-1	-1	-1
Alpha	NS7a	NS7a_K2R	K	2	R	1	0.0396	0.0396	2	0.000989001	28.0134	-0.6	0.000989001	28.0134	0.6				450	9	FALSE	FALSE	-1	-1	-1	-1	-1	-1
Alpha	NS7a	NS7a_K72Q	K	72	Q	1	0.0385	0.0385	1	-0.999001	-0.0431	0.4	0.999001	0.0431	0.4				59	38	FALSE	FALSE	-1	-1	-1	-1	-1	-1
Alpha	NS7a	NS7a_L112F	L	112	F	1	0.0545	0.0545	0	0	34.0162	-1	0	34.0162	1				1605	87	FALSE	FALSE	-1	-1	-1	-1	-1	-1
Alpha	NS7a	NS7a_L116F	L	116	F	4	0.55105	0.9961	0	0	34.0162	-1	0	34.0162	1				35393	362	FALSE	FALSE	-1	-1	-1	-1	-1	-1
Alpha	NS7a	NS7a_L17C	L	17	C	1	0.0306	0.0306	-1	-0.00990099	-10.0147	-1.3	0.00990099	10.0147	1.3				15	1	FALSE	FALSE	-1	-1	-1	-1	-1	-1
Alpha	NS7a	NS7a_L30F	L	30	F	1	0.0494	0.0494	0	0	34.0162	-1	0	34.0162	1				305	12	FALSE	FALSE	-1	-1	-1	-1	-1	-1
Alpha	NS7a	NS7a_L30P	L	30	P	1	0.035	0.035	-3	0.198427	-16.0424	-5.4	0.198427	16.0424	5.4				57	5	FALSE	FALSE	-1	-1	-1	-1	-1	-1
Alpha	NS7a	NS7a_L7V	L	7	V	1	0.045	0.045	1	-0.0261132	-14.0266	0.4	0.0261132	14.0266	0.4				1283	8	FALSE	FALSE	-1	-1	-1	-1	-1	-1
Alpha	NS7a	NS7a_L96F	L	96	F	1	0.997	0.997	0	0	34.0162	-1	0	34.0162	1				4921	634	FALSE	FALSE	-1	-1	-1	-1	-1	-1
Alpha	NS7a	NS7a_L96Q	L	96	Q	1	0.0704	0.0704	-2	0	14.9716	-7.3	0	14.9716	7.3				5	0	FALSE	FALSE	-1	-1	-1	-1	-1	-1
Alpha	NS7a	NS7a_P34L	P	34	L	1	0.0924	0.0924	-3	-0.198427	16.0424	5.4	0.198427	16.0424	5.4				8598	341	FALSE	FALSE	-1	-1	-1	-1	-1	-1
Alpha	NS7a	NS7a_P45S	P	45	S	1	0.0325	0.0325	-1	-0.498382	-10.0379	0.8	0.498382	10.0379	0.8				1912	67	FALSE	FALSE	-1	-1	-1	-1	-1	-1
Alpha	NS7a	NS7a_P68T	P	68	T	1	0.0414	0.0414	-1	-0.560332	3.9887	0.9	0.560332	3.9887	0.9				867	33	FALSE	FALSE	-1	-1	-1	-1	-1	-1
Alpha	NS7a	NS7a_P84I	P	84	I	1	0.1111	0.1111	-3	-0.198427	16.0424	6.1	0.198427	16.0424	6.1				3	1	FALSE	FALSE	-1	-1	-1	-1	-1	-1
Alpha	NS7a	NS7a_P84S	P	84	S	1	0.1553	0.1553	-1	-0.498382	-10.0379	0.8	0.498382	10.0379	0.8				5849	293	FALSE	FALSE	-1	-1	-1	-1	-1	-1
Alpha	NS7a	NS7a_P99L	P	99	L	1	1	1	-3	-0.198427	16.0424	5.4	0.198427	16.0424	5.4				8798	324	FALSE	FALSE	-1	-1	-1	-1	-1	-1
Alpha	NS7a	NS7a_P99R	P	99	R	1	0.07	0.07	-2	0.801563	59.0705	-2.9	0.801563	59.0705	2.9				322	17	FALSE	FALSE	-1	-1	-1	-1	-1	-1
Alpha	NS7a	NS7a_P99T	P	99	T	1	0.291	0.291	-1	-0.560332	3.9887	0.9	0.560332	3.9887	0.9				157	7	FALSE	FALSE	-1	-1	-1	-1	-1	-1
Alpha	NS7a	NS7a_Q90L	Q	90	L	1	0.0368	0.0368	-2	0	-14.9716	7.3	0	14.9716	7.3				223	4	FALSE	FALSE	-1	-1	-1	-1	-1	-1
Alpha	NS7a	NS7a_Q94H	Q	94	H	1	0.0373	0.0373	0	0.0871742	9.0101	0.3	0.0871742	9.0101	0.3				2835	152	FALSE	FALSE	-1	-1	-1	-1	-1	-1
Alpha	NS7a	NS7a_Q94R	Q	94	R	1	0.0704	0.0704	1	0.99999	28.0565	-1	0.99999	28.0565	1				2290	9	FALSE	FALSE	-1	-1	-1	-1	-1	-1
Alpha	NS7a	NS7a_R80K	R	80	K	1	0.9939	0.9939	2	-0.000989001	-28.0134	0.6	0.000989001	28.0134	0.6				692	29	FALSE	FALSE	-1	-1	-1	-1	-1	-1
Alpha	NS7a	NS7a_R80T	R	80	T	1	1	1	-1	-1.3619	-55.0818	3.8	1.3619	55.0818	3.8				1070	26	FALSE	FALSE	-1	-1	-1	-1	-1	-1
Alpha	NS7a	NS7a_R89I	R	89	I	1	0.9909	0.9909	-3	-0.99999	-43.0281	9	0.99999	43.0281	9				2131	147	FALSE	FALSE	-1	-1	-1	-1	-1	-1
Alpha	NS7a	NS7a_R89S	R	89	S	1	0.0335	0.0335	-1	-1.29995	-69.1084	3.7	1.29995	69.1084	3.7				109	31	FALSE	FALSE	-1	-1	-1	-1	-1	-1
Alpha	NS7a	NS7a_R89T	R	89	T	1	0.0302	0.0302	-1	-1.3619	-55.0818	3.8	1.3619	55.0818	3.8				389	12	FALSE	FALSE	-1	-1	-1	-1	-1	-1
Alpha	NS7a	NS7a_S36T	S	36	T	1	0.1166	0.1166	1	-0.0619499	14.0266	0.1	0.0619499	14.0266	0.1				70	2	FALSE	FALSE	-1	-1	-1	-1	-1	-1
Alpha	NS7a	NS7a_S37P	S	37	P	1	0.0366	0.0366	-1	0.498382	10.0379	-0.8	0.498382	10.0379	0.8				295	12	FALSE	FALSE	-1	-1	-1	-1	-1	-1
Alpha	NS7a	NS7a_S83L	S	83	L	1	1	1	-2	0.299955	26.0803	4.6	0.299955	26.0803	4.6				7895	254	FALSE	FALSE	-1	-1	-1	-1	-1	-1
Alpha	NS7a	NS7a_S98F	S	98	F	1	0.07	0.07	-2	0.299955	60.0965	3.6	0.299955	60.0965	3.6				2181	147	FALSE	FALSE	-1	-1	-1	-1	-1	-1
Alpha	NS7a	NS7a_T11A	T	11	A	1	0.8516	0.8516	0	0.397678	-30.026	2.5	0.397678	30.026	2.5				585	65	FALSE	FALSE	-1	-1	-1	-1	-1	-1
Alpha	NS7a	NS7a_T14I	T	14	I	2	0.54385	0.9911	-1	0.361905	12.0537	5.2	0.361905	12.0537	5.2				8973	4838	FALSE	FALSE	-1	-1	-1	0.937381	2	1
Alpha	NS7a	NS7a_T14N	T	14	N	1	0.9996	0.9996	0	0.361905	12.9987	-2.8	0.361905	12.9987	2.8				494	26	FALSE	FALSE	-1	-1	-1	-1	-1	-1
Alpha	NS7a	NS7a_T14S	T	14	S	1	0.0571	0.0571	1	0.0619499	-14.0266	-0.1	0.0619499	14.0266	0.1				191	3	FALSE	FALSE	-1	-1	-1	-1	-1	-1
Alpha	NS7a	NS7a_T27P	T	27	P	1	0.0727	0.0727	-1	0.560332	-3.9887	-0.9	0.560332	3.9887	0.9				11	0	FALSE	FALSE	-1	-1	-1	-1	-1	-1
Alpha	NS7a	NS7a_T28I	T	28	I	1	0.9964	0.9964	-1	0.361905	12.0537	5.2	0.361905	12.0537	5.2				18011	907	FALSE	FALSE	-1	-1	-1	-1	-1	-1
Alpha	NS7a	NS7a_T39I	T	39	I	6	0.39235	0.9474	-1	0.361905	12.0537	5.2	0.361905	12.0537	5.2				10830	930	FALSE	FALSE	0.660797	0	0	-1	-1	-1
Alpha	NS7a	NS7a_T39K	T	39	K	6	0.10135	0.1402	-1	1.36091	27.0684	-3.2	1.36091	27.0684	3.2				166	13	FALSE	FALSE	0.938741	1	1	-1	-1	-1
Alpha	NS7a	NS7a_T39S	T	39	S	2	0.0332	0.0337	1	0.0619499	-14.0266	-0.1	0.0619499	14.0266	0.1				97	3	FALSE	FALSE	-1	-1	-1	-1	-1	-1
Alpha	NS7a	NS7a_T61I	T	61	I	1	0.667	0.667	-1	0.361905	12.0537	5.2	0.361905	12.0537	5.2				4093	238	FALSE	FALSE	-1	-1	-1	-1	-1	-1
Alpha	NS7a	NS7a_V104A	V	104	A	2	0.0779	0.087	0	0.0618862	-28.0531	-2.4	0.0618862	28.0531	2.4				212	5	FALSE	FALSE	-1	-1	-1	-1	-1	-1
Alpha	NS7a	NS7a_V104L	V	104	L	2	0.88165	0.8859	1	0.0261132	14.0266	-0.4	0.0261132	14.0266	0.4				2502	104	FALSE	FALSE	-1	-1	-1	-1	-1	-1
Alpha	NS7a	NS7a_V108L	V	108	L	1	0.9927	0.9927	1	0.0261132	14.0266	-0.4	0.0261132	14.0266	0.4				550	44	FALSE	FALSE	-1	-1	-1	-1	-1	-1
Alpha	NS7a	NS7a_V24F	V	24	F	1	0.9958	0.9958	-1	0.0261132	48.0428	-1.4	0.0261132	48.0428	1.4				4697	311	FALSE	FALSE	-1	-1	-1	-1	-1	-1
Alpha	NS7a	NS7a_V29A	V	29	A	1	0.9957	0.9957	0	0.0618862	-28.0531	-2.4	0.0618862	28.0531	2.4				321	13	FALSE	FALSE	-1	-1	-1	-1	-1	-1
Alpha	NS7a	NS7a_V29D	V	29	D	1	0.0734	0.0734	-3	-0.969585	15.9564	-7.7	0.969585	15.9564	7.7				0	0	FALSE	FALSE	-1	-1	-1	-1	-1	-1
Alpha	NS7a	NS7a_V29L	V	29	L	3	0.0331	0.9973	1	0.0261132	14.0266	-0.4	0.0261132	14.0266	0.4				2153	267	FALSE	FALSE	-1	-1	-1	-1	-1	-1
Alpha	NS7a	NS7a_V82A	V	82	A	1	0.2694	0.2694	0	0.0618862	-28.0531	-2.4	0.0618862	28.0531	2.4				1175164	380	TRUE	TRUE	-1	-1	-1	-1	-1	-1
Alpha	NS7a	NS7a_V82F	V	82	F	1	0.9921	0.9921	-1	0.0261132	48.0428	-1.4	0.0261132	48.0428	1.4				609	113	FALSE	FALSE	-1	-1	-1	-1	-1	-1
Alpha	NS7a	NS7a_V82N	V	82	N	1	0.0644	0.0644	-3	0.0261132	14.9716	-7.7	0.0261132	14.9716	7.7				5	1	FALSE	FALSE	-1	-1	-1	-1	-1	-1
Alpha	NS7a	NS7a_V93A	V	93	A	1	0.0625	0.0625	0	0.0618862	-28.0531	-2.4	0.0618862	28.0531	2.4				150	13	FALSE	FALSE	-1	-1	-1	-1	-1	-1
Alpha	NS7a	NS7a_V93L	V	93	L	1	0.9757	0.9757	1	0.0261132	14.0266	-0.4	0.0261132	14.0266	0.4				436	74	FALSE	FALSE	-1	-1	-1	-1	-1	-1
Alpha	NS7a	NS7a_Y20C	Y	20	C	1	0.0502	0.0502	-2	-0.00890199	-60.0303	3.8	0.00890199	60.0303	3.8				312	13	FALSE	FALSE	-1	-1	-1	-1	-1	-1
Alpha	NS7a	NS7a_Y40C	Y	40	C	2	0.05435	0.0545	-2	-0.00890199	-60.0303	3.8	0.00890199	60.0303	3.8				74	6	FALSE	FALSE	-1	-1	-1	-1	-1	-1
Alpha	NS7a	NS7a_Y40H	Y	40	H	6	0.0962	0.241	2	0.0881732	-26.0339	-1.9	0.0881732	26.0339	1.9				1393	46	FALSE	FALSE	0.938741	1	1	-1	-1	-1
Alpha	NS7a	NS7a_Y40S	Y	40	S	1	0.0314	0.0314	-2	-0.298956	-76.0959	0.5	0.298956	76.0959	0.5				18	3	FALSE	FALSE	-1	-1	-1	-1	-1	-1
Alpha	NS7a	NS7a_Y40V	Y	40	V	2	0.1115	0.1146	-1	-0.0251142	-64.0422	5.5	0.0251142	64.0422	5.5				1	0	FALSE	FALSE	-1	-1	-1	-1	-1	-1
Alpha	NS7b	NS7b_A15S	A	15	S	3	0.6237	0.7566	1	-0.335728	15.9994	-2.6	0.335728	15.9994	2.6				11303	1060	FALSE	FALSE	-1	-1	-1	0.77544	0	0
Alpha	NS7b	NS7b_A15T	A	15	T	1	0.0309	0.0309	0	-0.397678	30.026	-2.5	0.397678	30.026	2.5				214	20	FALSE	FALSE	-1	-1	-1	-1	-1	-1
Alpha	NS7b	NS7b_C12G	C	12	G	1	0.0462	0.0462	-3	0.00990099	-46.0916	-2.9	0.00990099	46.0916	2.9				3	2	FALSE	FALSE	-1	-1	-1	-1	-1	-1
Alpha	NS7b	NS7b_C12S	C	12	S	1	0.0328	0.0328	-1	-0.290054	-16.0656	-3.3	0.290054	16.0656	3.3				30	0	FALSE	FALSE	-1	-1	-1	-1	-1	-1
Alpha	NS7b	NS7b_C41F	C	41	F	1	0.063	0.063	-2	0.00990099	44.0309	0.3	0.00990099	44.0309	0.3				1215	1391	FALSE	FALSE	-1	-1	-1	0.300492	0	0
Alpha	NS7b	NS7b_C41S	C	41	S	1	0.038	0.038	-1	-0.290054	-16.0656	-3.3	0.290054	16.0656	3.3				421	94	FALSE	FALSE	-1	-1	-1	-1	-1	-1
Alpha	NS7b	NS7b_D8Y	D	8	Y	1	0.045	0.045	-3	0.994699	48.0858	2.2	0.994699	48.0858	2.2				189	75	FALSE	FALSE	-1	-1	-1	-1	-1	-1
Alpha	NS7b	NS7b_E39G	E	39	G	2	0.9836	0.9845	-2	0.918037	-72.0627	3.1	0.918037	72.0627	3.1				165	6	FALSE	FALSE	-1	-1	-1	-1	-1	-1
Alpha	NS7b	NS7b_E39K	E	39	K	1	0.0352	0.0352	1	1.91704	-0.9417	-0.4	1.91704	0.9417	0.4				203	85	FALSE	FALSE	-1	-1	-1	-1	-1	-1
Alpha	NS7b	NS7b_E39Q	E	39	Q	15	0.047	0.0706	2	0.918037	-0.9848	0	0.918037	0.9848	0				501	27	FALSE	FALSE	0.960745	1	1	-1	-1	-1
Alpha	NS7b	NS7b_F13L	F	13	L	4	0.05135	0.0646	0	0	-34.0162	1	0	34.0162	1				2252	10	FALSE	FALSE	-1	-1	-1	-1	-1	-1
Alpha	NS7b	NS7b_F19S	F	19	S	1	0.0449	0.0449	-2	-0.299955	-60.0965	-3.6	0.299955	60.0965	3.6				2674	199	FALSE	FALSE	-1	-1	-1	-1	-1	-1
Alpha	NS7b	NS7b_F30N	F	30	N	1	1	1	-3	0	-33.0712	-6.3	0	33.0712	6.3				2	0	FALSE	FALSE	-1	-1	-1	-1	-1	-1
Alpha	NS7b	NS7b_F9Y	F	9	Y	1	0.0661	0.0661	3	-0.000999001	15.9994	-4.1	0.000999001	15.9994	4.1				15	1	FALSE	FALSE	-1	-1	-1	-1	-1	-1
Alpha	NS7b	NS7b_H37L	H	37	L	1	1	1	-3	-0.0871742	-23.9817	7	0.0871742	23.9817	7				632	1266	FALSE	FALSE	-1	-1	-1	0.935718	6	1
Alpha	NS7b	NS7b_H42L	H	42	L	1	0.0353	0.0353	-3	-0.0871742	-23.9817	7	0.0871742	23.9817	7				39	0	FALSE	FALSE	-1	-1	-1	-1	-1	-1
Alpha	NS7b	NS7b_H42R	H	42	R	29	0.057	0.1355	0	0.912816	19.0464	-1.3	0.912816	19.0464	1.3				551	20	FALSE	FALSE	0.914612	1	1	-1	-1	-1
Alpha	NS7b	NS7b_H42Y	H	42	Y	5	0.9964	1	2	-0.0881732	26.0339	1.9	0.0881732	26.0339	1.9				9800	894	FALSE	FALSE	-1	-1	-1	-1	-1	-1
Alpha	NS7b	NS7b_I23M	I	23	M	1	0.0952	0.0952	1	-0.259747	18.0384	-2.6	0.259747	18.0384	2.6				2	0	FALSE	FALSE	-1	-1	-1	-1	-1	-1
Alpha	NS7b	NS7b_I26L	I	26	L	1	0.1173	0.1173	2	0	0	-0.7	0	0	0.7				2643	166	FALSE	FALSE	-1	-1	-1	-1	-1	-1
Alpha	NS7b	NS7b_I26N	I	26	N	1	0.0867	0.0867	-3	0	0.945	-8	0	0.945	8				8	1	FALSE	FALSE	-1	-1	-1	-1	-1	-1
Alpha	NS7b	NS7b_I26S	I	26	S	1	0.1399	0.1399	-2	-0.299955	-26.0803	-5.3	0.299955	26.0803	5.3				410	12	FALSE	FALSE	-1	-1	-1	-1	-1	-1
Alpha	NS7b	NS7b_I26V	I	26	V	1	0.7857	0.7857	3	-0.0261132	-14.0266	-0.3	0.0261132	14.0266	0.3				789	38	FALSE	FALSE	-1	-1	-1	-1	-1	-1
Alpha	NS7b	NS7b_I27L	I	27	L	1	0.8085	0.8085	2	0	0	-0.7	0	0	0.7				33	24	FALSE	FALSE	-1	-1	-1	-1	-1	-1
Alpha	NS7b	NS7b_I27N	I	27	N	1	0.1223	0.1223	-3	0	0.945	-8	0	0.945	8				4	0	FALSE	FALSE	-1	-1	-1	-1	-1	-1
Alpha	NS7b	NS7b_I27T	I	27	T	1	0.0382	0.0382	-1	-0.361905	-12.0537	-5.2	0.361905	12.0537	5.2				617	51	FALSE	FALSE	-1	-1	-1	-1	-1	-1
Alpha	NS7b	NS7b_I27V	I	27	V	1	0.0638	0.0638	3	-0.0261132	-14.0266	-0.3	0.0261132	14.0266	0.3				775	33	FALSE	FALSE	-1	-1	-1	-1	-1	-1
Alpha	NS7b	NS7b_L11W	L	11	W	1	0.033	0.033	-2	0	73.0523	-4.7	0	73.0523	4.7				22	0	FALSE	FALSE	-1	-1	-1	-1	-1	-1
Alpha	NS7b	NS7b_L14F	L	14	F	1	0.0327	0.0327	0	0	34.0162	-1	0	34.0162	1				2677	46	FALSE	FALSE	-1	-1	-1	-1	-1	-1
Alpha	NS7b	NS7b_L14V	L	14	V	2	0.0827	0.0992	1	-0.0261132	-14.0266	0.4	0.0261132	14.0266	0.4				33	6	FALSE	FALSE	-1	-1	-1	-1	-1	-1
Alpha	NS7b	NS7b_L17V	L	17	V	1	1	1	1	-0.0261132	-14.0266	0.4	0.0261132	14.0266	0.4				172	3	FALSE	FALSE	-1	-1	-1	-1	-1	-1
Alpha	NS7b	NS7b_L18Q	L	18	Q	2	0.79655	0.9905	-2	0	14.9716	-7.3	0	14.9716	7.3				3	73	FALSE	FALSE	-1	-1	-1	-1	-1	-1
Alpha	NS7b	NS7b_L25D	L	25	D	1	0.6957	0.6957	-4	-0.995698	1.9298	-7.3	0.995698	1.9298	7.3				0	0	FALSE	FALSE	-1	-1	-1	-1	-1	-1
Alpha	NS7b	NS7b_L25F	L	25	F	1	0.1565	0.1565	0	0	34.0162	-1	0	34.0162	1				1878	124	FALSE	FALSE	-1	-1	-1	-1	-1	-1
Alpha	NS7b	NS7b_L32F	L	32	F	3	0.9876	0.9981	0	0	34.0162	-1	0	34.0162	1				5260	335	FALSE	FALSE	-1	-1	-1	-1	-1	-1
Alpha	NS7b	NS7b_L4F	L	4	F	1	0.9829	0.9829	0	0	34.0162	-1	0	34.0162	1				5318	325	FALSE	FALSE	-1	-1	-1	-1	-1	-1
Alpha	NS7b	NS7b_M24I	M	24	I	2	0.5299	1	1	0.259747	-18.0384	2.6	0.259747	18.0384	2.6				830	242	FALSE	FALSE	-1	-1	-1	-1	-1	-1
Alpha	NS7b	NS7b_M24L	M	24	L	1	0.6122	0.6122	2	0.259747	-18.0384	1.9	0.259747	18.0384	1.9				121	74	FALSE	FALSE	-1	-1	-1	-1	-1	-1
Alpha	NS7b	NS7b_S31K	S	31	K	1	1	1	0	1.29896	41.095	-3.1	1.29896	41.095	3.1				1	0	FALSE	FALSE	-1	-1	-1	-1	-1	-1
Alpha	NS7b	NS7b_S31L	S	31	L	3	0.544	0.9965	-2	0.299955	26.0803	4.6	0.299955	26.0803	4.6				5707	694	FALSE	FALSE	-1	-1	-1	-1	-1	-1
Alpha	NS7b	NS7b_T40I	T	40	I	5	0.0424	0.249	-1	0.361905	12.0537	5.2	0.361905	12.0537	5.2				1085076	944	TRUE	TRUE	-1	-1	-1	-1	-1	-1
Alpha	NS7b	NS7b_T40S	T	40	S	18	0.04855	0.0857	1	0.0619499	-14.0266	-0.1	0.0619499	14.0266	0.1				119	11	FALSE	FALSE	0.960745	2	1	-1	-1	-1
Alpha	NS7b	NS7b_W29C	W	29	C	1	0.9922	0.9922	-2	-0.00990099	-83.067	3.4	0.00990099	83.067	3.4				602	63	FALSE	FALSE	-1	-1	-1	-1	-1	-1
Alpha	NS7b	NS7b_W29T	W	29	T	1	1	1	-2	-0.361905	-85.106	0.2	0.361905	85.106	0.2				1	0	FALSE	FALSE	-1	-1	-1	-1	-1	-1
Alpha	NS7b	NS7b_Y10C	Y	10	C	1	0.123	0.123	-2	-0.00890199	-60.0303	3.8	0.00890199	60.0303	3.8				100	48	FALSE	FALSE	-1	-1	-1	-1	-1	-1
Alpha	NS8	NS8_A51S	A	51	S	2	0.9992	1	1	-0.335728	15.9994	-2.6	0.335728	15.9994	2.6				6193	256	FALSE	FALSE	-1	-1	-1	-1	-1	-1
Alpha	NS8	NS8_A55G	A	55	G	1	0.9974	0.9974	0	-0.035773	-14.0266	-2.2	0.035773	14.0266	2.2				41	0	FALSE	FALSE	-1	-1	-1	-1	-1	-1
Alpha	NS8	NS8_A55V	A	55	V	1	0.1326	0.1326	0	-0.0618862	28.0531	2.4	0.0618862	28.0531	2.4				3406	302	FALSE	FALSE	-1	-1	-1	-1	-1	-1
Alpha	NS8	NS8_A65D	A	65	D	1	0.0372	0.0372	-2	-1.03147	44.0095	-5.3	1.03147	44.0095	5.3				9692	23	FALSE	FALSE	-1	-1	-1	-1	-1	-1
Alpha	NS8	NS8_A65G	A	65	G	4	0.0475	0.0503	0	-0.035773	-14.0266	-2.2	0.035773	14.0266	2.2				275	97	FALSE	FALSE	-1	-1	-1	-1	-1	-1
Alpha	NS8	NS8_A65S	A	65	S	3	0.8578	0.9956	1	-0.335728	15.9994	-2.6	0.335728	15.9994	2.6				15202	1614	FALSE	FALSE	-1	-1	-1	0.45677	0	0
Alpha	NS8	NS8_A65V	A	65	V	16	0.8056	0.9966	0	-0.0618862	28.0531	2.4	0.0618862	28.0531	2.4				16359	6320	FALSE	FALSE	0.626668	0	0	0.921249	1	1
Alpha	NS8	NS8_C102F	C	102	F	1	0.0372	0.0372	-2	0.00990099	44.0309	0.3	0.00990099	44.0309	0.3				4537	417	FALSE	FALSE	-1	-1	-1	-1	-1	-1
Alpha	NS8	NS8_C25G	C	25	G	2	0.0496	0.0578	-3	0.00990099	-46.0916	-2.9	0.00990099	46.0916	2.9				3	3	FALSE	FALSE	-1	-1	-1	-1	-1	-1
Alpha	NS8	NS8_C25W	C	25	W	1	0.0433	0.0433	-2	0.00990099	83.067	-3.4	0.00990099	83.067	3.4				1	0	FALSE	FALSE	-1	-1	-1	-1	-1	-1
Alpha	NS8	NS8_C37F	C	37	F	2	0.4778	0.9251	-2	0.00990099	44.0309	0.3	0.00990099	44.0309	0.3				2445	122	FALSE	FALSE	-1	-1	-1	-1	-1	-1
Alpha	NS8	NS8_C37S	C	37	S	1	0.1716	0.1716	-1	-0.290054	-16.0656	-3.3	0.290054	16.0656	3.3				240	41	FALSE	FALSE	-1	-1	-1	-1	-1	-1
Alpha	NS8	NS8_C61F	C	61	F	2	0.99285	0.9956	-2	0.00990099	44.0309	0.3	0.00990099	44.0309	0.3				12257	27	FALSE	FALSE	-1	-1	-1	-1	-1	-1
Alpha	NS8	NS8_D113G	D	113	G	1	0.042	0.042	-1	0.995698	-58.0361	3.1	0.995698	58.0361	3.1				91	1	FALSE	FALSE	-1	-1	-1	-1	-1	-1
Alpha	NS8	NS8_D113H	D	113	H	52	0.0375	0.0905	-1	1.08287	22.0519	0.3	1.08287	22.0519	0.3				14	1	FALSE	FALSE	0.506278	0	0	-1	-1	-1
Alpha	NS8	NS8_D113N	D	113	N	407	0.0754	0.2168	1	0.995698	-0.9848	0	0.995698	0.9848	0				13	1	FALSE	FALSE	0.713556	0	0	-1	-1	-1
Alpha	NS8	NS8_D119E	D	119	E	40	0.08	0.1508	2	0.0776616	14.0266	0	0.0776616	14.0266	0				1028	43	FALSE	FALSE	0.994959	3	1	-1	-1	-1
Alpha	NS8	NS8_D119I	D	119	I	1	0.0311	0.0311	-3	0.995698	-1.9298	8	0.995698	1.9298	8				352	0	FALSE	FALSE	-1	-1	-1	-1	-1	-1
Alpha	NS8	NS8_D119S	D	119	S	3	0.0588	0.0613	0	0.695743	-28.0101	2.7	0.695743	28.0101	2.7				11	11	FALSE	FALSE	-1	-1	-1	-1	-1	-1
Alpha	NS8	NS8_D119V	D	119	V	1	0.0311	0.0311	-3	0.969585	-15.9564	7.7	0.969585	15.9564	7.7				2791	36	FALSE	FALSE	-1	-1	-1	-1	-1	-1
Alpha	NS8	NS8_D119Y	D	119	Y	1	0.8929	0.8929	-3	0.994699	48.0858	2.2	0.994699	48.0858	2.2				268	75	FALSE	FALSE	-1	-1	-1	-1	-1	-1
Alpha	NS8	NS8_D34Y	D	34	Y	1	0.0316	0.0316	-3	0.994699	48.0858	2.2	0.994699	48.0858	2.2				346	39	FALSE	FALSE	-1	-1	-1	-1	-1	-1
Alpha	NS8	NS8_D35G	D	35	G	1	0.0594	0.0594	-1	0.995698	-58.0361	3.1	0.995698	58.0361	3.1				125	150	FALSE	FALSE	-1	-1	-1	-1	-1	-1
Alpha	NS8	NS8_D35Y	D	35	Y	1	1	1	-3	0.994699	48.0858	2.2	0.994699	48.0858	2.2				2530	568	FALSE	FALSE	-1	-1	-1	-1	-1	-1
Alpha	NS8	NS8_D63N	D	63	N	1	0.0328	0.0328	1	0.995698	-0.9848	0	0.995698	0.9848	0				1069	60	FALSE	FALSE	-1	-1	-1	-1	-1	-1
Alpha	NS8	NS8_D75N	D	75	N	1	0.0331	0.0331	1	0.995698	-0.9848	0	0.995698	0.9848	0				534	52	FALSE	FALSE	-1	-1	-1	-1	-1	-1
Alpha	NS8	NS8_E106K	E	106	K	1	0.0901	0.0901	1	1.91704	-0.9417	-0.4	1.91704	0.9417	0.4				129	17	FALSE	FALSE	-1	-1	-1	-1	-1	-1
Alpha	NS8	NS8_E19K	E	19	K	1	0.0622	0.0622	1	1.91704	-0.9417	-0.4	1.91704	0.9417	0.4				105	73	FALSE	FALSE	-1	-1	-1	-1	-1	-1
Alpha	NS8	NS8_E92A	E	92	A	1	0.8319	0.8319	-1	0.95381	-58.0361	5.3	0.95381	58.0361	5.3				56	74	FALSE	FALSE	-1	-1	-1	-1	-1	-1
Alpha	NS8	NS8_E92D	E	92	D	3	0.0737	0.1217	2	-0.0776616	-14.0266	0	0.0776616	14.0266	0				26	2	FALSE	FALSE	-1	-1	-1	-1	-1	-1
Alpha	NS8	NS8_E92K	E	92	K	7	0.9949	0.9978	1	1.91704	-0.9417	-0.4	1.91704	0.9417	0.4				55099	1035	FALSE	FALSE	0.924755	1	1	0.817176	0	0
Alpha	NS8	NS8_F108L	F	108	L	1	0.034	0.034	0	0	-34.0162	1	0	34.0162	1				153	12	FALSE	FALSE	-1	-1	-1	-1	-1	-1
Alpha	NS8	NS8_F120I	F	120	I	1	0.1017	0.1017	0	0	-34.0162	1.7	0	34.0162	1.7				9	1	FALSE	FALSE	-1	-1	-1	-1	-1	-1
Alpha	NS8	NS8_F120L	F	120	L	7	0.0491	0.1703	0	0	-34.0162	1	0	34.0162	1				6964	203	FALSE	FALSE	0.2934	0	0	-1	-1	-1
Alpha	NS8	NS8_F120N	F	120	N	38	0.08235	0.15	-3	0	-33.0712	-6.3	0	33.0712	6.3				0	0	FALSE	FALSE	0.994959	3	1	-1	-1	-1
Alpha	NS8	NS8_F120V	F	120	V	22	0.06465	0.9495	-1	-0.0261132	-48.0428	1.4	0.0261132	48.0428	1.4				7173	381	FALSE	FALSE	0.216368	0	0	-1	-1	-1
Alpha	NS8	NS8_F3I	F	3	I	1	0.0488	0.0488	0	0	-34.0162	1.7	0	34.0162	1.7				107	28	FALSE	FALSE	-1	-1	-1	-1	-1	-1
Alpha	NS8	NS8_F6L	F	6	L	2	0.51325	0.988	0	0	-34.0162	1	0	34.0162	1				205	25	FALSE	FALSE	-1	-1	-1	-1	-1	-1
Alpha	NS8	NS8_G50E	G	50	E	1	0.0362	0.0362	-2	-0.918037	72.0627	-3.1	0.918037	72.0627	3.1				333	7	FALSE	FALSE	-1	-1	-1	-1	-1	-1
Alpha	NS8	NS8_G50R	G	50	R	2	0.0399	0.0411	-2	0.99999	99.1344	-4.1	0.99999	99.1344	4.1				295	29	FALSE	FALSE	-1	-1	-1	-1	-1	-1
Alpha	NS8	NS8_G66C	G	66	C	3	0.0379	0.3584	-3	-0.00990099	46.0916	2.9	0.00990099	46.0916	2.9				1060	86	FALSE	FALSE	-1	-1	-1	-1	-1	-1
Alpha	NS8	NS8_G77A	G	77	A	1	0.0779	0.0779	0	0.035773	14.0266	2.2	0.035773	14.0266	2.2				12	0	FALSE	FALSE	-1	-1	-1	-1	-1	-1
Alpha	NS8	NS8_G77C	G	77	C	2	0.52075	0.9941	-3	-0.00990099	46.0916	2.9	0.00990099	46.0916	2.9				1004	150	FALSE	FALSE	-1	-1	-1	-1	-1	-1
Alpha	NS8	NS8_G77R	G	77	R	1	0.0305	0.0305	-2	0.99999	99.1344	-4.1	0.99999	99.1344	4.1				27	2	FALSE	FALSE	-1	-1	-1	-1	-1	-1
Alpha	NS8	NS8_G77V	G	77	V	1	0.0972	0.0972	-3	-0.0261132	42.0797	4.6	0.0261132	42.0797	4.6				330	27	FALSE	FALSE	-1	-1	-1	-1	-1	-1
Alpha	NS8	NS8_G8R	G	8	R	6	0.9982	1	-2	0.99999	99.1344	-4.1	0.99999	99.1344	4.1				2098	1257	FALSE	FALSE	0.926085	1	1	0.930164	1	1
Alpha	NS8	NS8_G8V	G	8	V	5	0.9961	0.9976	-3	-0.0261132	42.0797	4.6	0.0261132	42.0797	4.6				2289	341	FALSE	FALSE	-1	-1	-1	-1	-1	-1
Alpha	NS8	NS8_G96C	G	96	C	1	0.7723	0.7723	-3	-0.00990099	46.0916	2.9	0.00990099	46.0916	2.9				315	97	FALSE	FALSE	-1	-1	-1	-1	-1	-1
Alpha	NS8	NS8_G96D	G	96	D	1	0.1652	0.1652	-1	-0.995698	58.0361	-3.1	0.995698	58.0361	3.1				77	11	FALSE	FALSE	-1	-1	-1	-1	-1	-1
Alpha	NS8	NS8_H112Q	H	112	Q	103	0.0397	0.09	0	-0.0871742	-9.0101	-0.3	0.0871742	9.0101	0.3				12	8	FALSE	FALSE	0.53198	0	0	-1	-1	-1
Alpha	NS8	NS8_H112Y	H	112	Y	1	0.8571	0.8571	2	-0.0881732	26.0339	1.9	0.0881732	26.0339	1.9				1083	21	FALSE	FALSE	-1	-1	-1	-1	-1	-1
Alpha	NS8	NS8_H17Y	H	17	Y	8	0.9812	1	2	-0.0881732	26.0339	1.9	0.0881732	26.0339	1.9				13235	1991	FALSE	FALSE	0.366317	0	0	0.90214	1	1
Alpha	NS8	NS8_H40L	H	40	L	1	0.0412	0.0412	-3	-0.0871742	-23.9817	7	0.0871742	23.9817	7				60	1	FALSE	FALSE	-1	-1	-1	-1	-1	-1
Alpha	NS8	NS8_H40N	H	40	N	1	1	1	1	-0.0871742	-23.0367	-0.3	0.0871742	23.0367	0.3				388	6	FALSE	FALSE	-1	-1	-1	-1	-1	-1
Alpha	NS8	NS8_H40P	H	40	P	1	0.037	0.037	-2	0.111253	-40.0241	1.6	0.111253	40.0241	1.6				7	1	FALSE	FALSE	-1	-1	-1	-1	-1	-1
Alpha	NS8	NS8_H40Q	H	40	Q	1	0.9984	0.9984	0	-0.0871742	-9.0101	-0.3	0.0871742	9.0101	0.3				146	11	FALSE	FALSE	-1	-1	-1	-1	-1	-1
Alpha	NS8	NS8_I10K	I	10	K	4	0.03995	0.0536	-3	0.999001	15.0147	-8.4	0.999001	15.0147	8.4				1	1	FALSE	FALSE	-1	-1	-1	-1	-1	-1
Alpha	NS8	NS8_I10T	I	10	T	1	0.9984	0.9984	-1	-0.361905	-12.0537	-5.2	0.361905	12.0537	5.2				1402	578	FALSE	FALSE	-1	-1	-1	-1	-1	-1
Alpha	NS8	NS8_I10V	I	10	V	1	0.1156	0.1156	3	-0.0261132	-14.0266	-0.3	0.0261132	14.0266	0.3				388	249	FALSE	FALSE	-1	-1	-1	-1	-1	-1
Alpha	NS8	NS8_I39L	I	39	L	1	0.1461	0.1461	2	0	0	-0.7	0	0	0.7				34	5	FALSE	FALSE	-1	-1	-1	-1	-1	-1
Alpha	NS8	NS8_I39T	I	39	T	2	0.52325	1	-1	-0.361905	-12.0537	-5.2	0.361905	12.0537	5.2				2717	450	FALSE	FALSE	-1	-1	-1	-1	-1	-1
Alpha	NS8	NS8_I39V	I	39	V	1	0.8502	0.8502	3	-0.0261132	-14.0266	-0.3	0.0261132	14.0266	0.3				317	21	FALSE	FALSE	-1	-1	-1	-1	-1	-1
Alpha	NS8	NS8_I71T	I	71	T	1	0.9975	0.9975	-1	-0.361905	-12.0537	-5.2	0.361905	12.0537	5.2				697	72	FALSE	FALSE	-1	-1	-1	-1	-1	-1
Alpha	NS8	NS8_I9Q	I	9	Q	2	0.03465	0.0366	-3	0	14.9716	-8	0	14.9716	8				0	0	FALSE	FALSE	-1	-1	-1	-1	-1	-1
Alpha	NS8	NS8_I9T	I	9	T	1	0.9951	0.9951	-1	-0.361905	-12.0537	-5.2	0.361905	12.0537	5.2				553	274	FALSE	FALSE	-1	-1	-1	-1	-1	-1
Alpha	NS8	NS8_L118I	L	118	I	1	0.9231	0.9231	2	0	0	0.7	0	0	0.7				173	10	FALSE	FALSE	-1	-1	-1	-1	-1	-1
Alpha	NS8	NS8_L118V	L	118	V	709	0.0948	0.751	1	-0.0261132	-14.0266	0.4	0.0261132	14.0266	0.4				7248	591	FALSE	FALSE	0.985946	3	1	-1	-1	-1
Alpha	NS8	NS8_L4I	L	4	I	1	0.0494	0.0494	2	0	0	0.7	0	0	0.7				124	32	FALSE	FALSE	-1	-1	-1	-1	-1	-1
Alpha	NS8	NS8_L4P	L	4	P	4	0.99455	1	-3	0.198427	-16.0424	-5.4	0.198427	16.0424	5.4				865	98	FALSE	FALSE	-1	-1	-1	-1	-1	-1
Alpha	NS8	NS8_L57S	L	57	S	1	0.9884	0.9884	-2	-0.299955	-26.0803	-4.6	0.299955	26.0803	4.6				238	12	FALSE	FALSE	-1	-1	-1	-1	-1	-1
Alpha	NS8	NS8_L84S	L	84	S	5	0.9476	0.9994	-2	-0.299955	-26.0803	-4.6	0.299955	26.0803	4.6				2084	10994	FALSE	FALSE	-1	-1	-1	0.9931	6	1
Alpha	NS8	NS8_L98P	L	98	P	1	0.9931	0.9931	-3	0.198427	-16.0424	-5.4	0.198427	16.0424	5.4				35	3	FALSE	FALSE	-1	-1	-1	-1	-1	-1
Alpha	NS8	NS8_N89S	N	89	S	2	0.78085	0.912	1	-0.299955	-27.0253	2.7	0.299955	27.0253	2.7				208	227	FALSE	FALSE	-1	-1	-1	-1	-1	-1
Alpha	NS8	NS8_P30L	P	30	L	1	0.9939	0.9939	-3	-0.198427	16.0424	5.4	0.198427	16.0424	5.4				1559	1235	FALSE	FALSE	-1	-1	-1	0.929913	1	1
Alpha	NS8	NS8_P30S	P	30	S	1	0.9905	0.9905	-1	-0.498382	-10.0379	0.8	0.498382	10.0379	0.8				567	79	FALSE	FALSE	-1	-1	-1	-1	-1	-1
Alpha	NS8	NS8_P36S	P	36	S	1	0.9818	0.9818	-1	-0.498382	-10.0379	0.8	0.498382	10.0379	0.8				11892	552	FALSE	FALSE	-1	-1	-1	-1	-1	-1
Alpha	NS8	NS8_P38A	P	38	A	1	0.9484	0.9484	-1	-0.162654	-26.0373	3.4	0.162654	26.0373	3.4				8	2	FALSE	FALSE	-1	-1	-1	-1	-1	-1
Alpha	NS8	NS8_P38C	P	38	C	1	0.049	0.049	-3	-0.208328	6.0277	4.1	0.208328	6.0277	4.1				52	0	FALSE	FALSE	-1	-1	-1	-1	-1	-1
Alpha	NS8	NS8_P38L	P	38	L	1	1	1	-3	-0.198427	16.0424	5.4	0.198427	16.0424	5.4				4039	174	FALSE	FALSE	-1	-1	-1	-1	-1	-1
Alpha	NS8	NS8_P38S	P	38	S	1	1	1	-1	-0.498382	-10.0379	0.8	0.498382	10.0379	0.8				10311	400	FALSE	FALSE	-1	-1	-1	-1	-1	-1
Alpha	NS8	NS8_P56L	P	56	L	1	0.9573	0.9573	-3	-0.198427	16.0424	5.4	0.198427	16.0424	5.4				327	35	FALSE	FALSE	-1	-1	-1	-1	-1	-1
Alpha	NS8	NS8_P70H	P	70	H	1	0.0323	0.0323	-2	-0.111253	40.0241	-1.6	0.111253	40.0241	1.6				116	0	FALSE	FALSE	-1	-1	-1	-1	-1	-1
Alpha	NS8	NS8_P93H	P	93	H	1	0.155	0.155	-2	-0.111253	40.0241	-1.6	0.111253	40.0241	1.6				232	34	FALSE	FALSE	-1	-1	-1	-1	-1	-1
Alpha	NS8	NS8_P93S	P	93	S	3	0.0409	0.1089	-1	-0.498382	-10.0379	0.8	0.498382	10.0379	0.8				16157	50	FALSE	FALSE	-1	-1	-1	-1	-1	-1
Alpha	NS8	NS8_Q18R	Q	18	R	1	0.0397	0.0397	1	0.99999	28.0565	-1	0.99999	28.0565	1				124	33	FALSE	FALSE	-1	-1	-1	-1	-1	-1
Alpha	NS8	NS8_Q72H	Q	72	H	1	0.0458	0.0458	0	0.0871742	9.0101	0.3	0.0871742	9.0101	0.3				7807	344	FALSE	FALSE	-1	-1	-1	-1	-1	-1
Alpha	NS8	NS8_Q91H	Q	91	H	5	0.0392	0.1269	0	0.0871742	9.0101	0.3	0.0871742	9.0101	0.3				188	29	FALSE	FALSE	-1	-1	-1	-1	-1	-1
Alpha	NS8	NS8_R101C	R	101	C	1	0.0474	0.0474	-3	-1.00989	-53.0428	7	1.00989	53.0428	7				630	14	FALSE	FALSE	-1	-1	-1	-1	-1	-1
Alpha	NS8	NS8_R115C	R	115	C	3	0.6182	0.8515	-3	-1.00989	-53.0428	7	1.00989	53.0428	7				7432	147	FALSE	FALSE	-1	-1	-1	-1	-1	-1
Alpha	NS8	NS8_R115L	R	115	L	1	0.5578	0.5578	-2	-0.99999	-43.0281	8.3	0.99999	43.0281	8.3				1168	193	FALSE	FALSE	-1	-1	-1	-1	-1	-1
Alpha	NS8	NS8_R115P	R	115	P	1	0.0359	0.0359	-2	-0.801563	-59.0705	2.9	0.801563	59.0705	2.9				160	6	FALSE	FALSE	-1	-1	-1	-1	-1	-1
Alpha	NS8	NS8_S24E	S	24	E	1	0.0391	0.0391	0	-0.618082	42.0367	-2.7	0.618082	42.0367	2.7				8	0	FALSE	FALSE	-1	-1	-1	-1	-1	-1
Alpha	NS8	NS8_S24L	S	24	L	255	0.9976	1	-2	0.299955	26.0803	4.6	0.299955	26.0803	4.6				2538	71306	FALSE	FALSE	0.779965	0	0	0.984585	14	1
Alpha	NS8	NS8_S54L	S	54	L	1	0.9609	0.9609	-2	0.299955	26.0803	4.6	0.299955	26.0803	4.6				6233	653	FALSE	FALSE	-1	-1	-1	-1	-1	-1
Alpha	NS8	NS8_S54P	S	54	P	1	0.9986	0.9986	-1	0.498382	10.0379	-0.8	0.498382	10.0379	0.8				1949	116	FALSE	FALSE	-1	-1	-1	-1	-1	-1
Alpha	NS8	NS8_S67F	S	67	F	6	0.59035	0.9862	-2	0.299955	60.0965	3.6	0.299955	60.0965	3.6				30006	2648	FALSE	FALSE	0.286405	0	0	0.836561	0	0
Alpha	NS8	NS8_S82P	S	82	P	2	0.98795	0.989	-1	0.498382	10.0379	-0.8	0.498382	10.0379	0.8				697	7	FALSE	FALSE	-1	-1	-1	-1	-1	-1
Alpha	NS8	NS8_S97I	S	97	I	3	1	1	-2	0.299955	26.0803	5.3	0.299955	26.0803	5.3				229	983	FALSE	FALSE	-1	-1	-1	-1	-1	-1
Alpha	NS8	NS8_T11I	T	11	I	32	0.9976	1	-1	0.361905	12.0537	5.2	0.361905	12.0537	5.2				20232	576	FALSE	FALSE	0.834829	0	0	-1	-1	-1
Alpha	NS8	NS8_T12I	T	12	I	2	0.46535	0.896	-1	0.361905	12.0537	5.2	0.361905	12.0537	5.2				674	15	FALSE	FALSE	-1	-1	-1	-1	-1	-1
Alpha	NS8	NS8_T12N	T	12	N	1	0.998	0.998	0	0.361905	12.9987	-2.8	0.361905	12.9987	2.8				80	36	FALSE	FALSE	-1	-1	-1	-1	-1	-1
Alpha	NS8	NS8_T26I	T	26	I	2	0.527	0.9993	-1	0.361905	12.0537	5.2	0.361905	12.0537	5.2				2537	911	FALSE	FALSE	-1	-1	-1	-1	-1	-1
Alpha	NS8	NS8_T87I	T	87	I	1	0.0779	0.0779	-1	0.361905	12.0537	5.2	0.361905	12.0537	5.2				6310	1099	FALSE	FALSE	-1	-1	-1	0.665269	0	0
Alpha	NS8	NS8_T87S	T	87	S	1	0.0833	0.0833	1	0.0619499	-14.0266	-0.1	0.0619499	14.0266	0.1				5771	2	FALSE	FALSE	-1	-1	-1	-1	-1	-1
Alpha	NS8	NS8_V100L	V	100	L	22	0.9934	1	1	0.0261132	14.0266	-0.4	0.0261132	14.0266	0.4				3266	973	FALSE	FALSE	0.498134	0	0	-1	-1	-1
Alpha	NS8	NS8_V114F	V	114	F	462	0.11775	0.7513	-1	0.0261132	48.0428	-1.4	0.0261132	48.0428	1.4				798	102	FALSE	FALSE	0.986319	3	1	-1	-1	-1
Alpha	NS8	NS8_V114I	V	114	I	2	0.93455	0.971	3	0.0261132	14.0266	0.3	0.0261132	14.0266	0.3				694	39	FALSE	FALSE	-1	-1	-1	-1	-1	-1
Alpha	NS8	NS8_V116F	V	116	F	1	0.5216	0.5216	-1	0.0261132	48.0428	-1.4	0.0261132	48.0428	1.4				220	47	FALSE	FALSE	-1	-1	-1	-1	-1	-1
Alpha	NS8	NS8_V116L	V	116	L	2	0.0812	0.1272	1	0.0261132	14.0266	-0.4	0.0261132	14.0266	0.4				40	8	FALSE	FALSE	-1	-1	-1	-1	-1	-1
Alpha	NS8	NS8_V116S	V	116	S	505	0.1176	0.7489	-2	-0.273842	-12.0537	-5	0.273842	12.0537	5				49	8	FALSE	FALSE	0.986319	3	1	-1	-1	-1
Alpha	NS8	NS8_V117I	V	117	I	1	0.8927	0.8927	3	0.0261132	14.0266	0.3	0.0261132	14.0266	0.3				93	37	FALSE	FALSE	-1	-1	-1	-1	-1	-1
Alpha	NS8	NS8_V117L	V	117	L	683	0.0929	0.7521	1	0.0261132	14.0266	-0.4	0.0261132	14.0266	0.4				334	27	FALSE	FALSE	0.985946	3	1	-1	-1	-1
Alpha	NS8	NS8_V32I	V	32	I	1	0.0733	0.0733	3	0.0261132	14.0266	0.3	0.0261132	14.0266	0.3				514	112	FALSE	FALSE	-1	-1	-1	-1	-1	-1
Alpha	NS8	NS8_V32L	V	32	L	2	0.53125	0.9975	1	0.0261132	14.0266	-0.4	0.0261132	14.0266	0.4				3098	1658	FALSE	FALSE	-1	-1	-1	0.947794	1	1
Alpha	NS8	NS8_V49I	V	49	I	1	0.0384	0.0384	3	0.0261132	14.0266	0.3	0.0261132	14.0266	0.3				260	6	FALSE	FALSE	-1	-1	-1	-1	-1	-1
Alpha	NS8	NS8_V5L	V	5	L	1	0.0375	0.0375	1	0.0261132	14.0266	-0.4	0.0261132	14.0266	0.4				216	23	FALSE	FALSE	-1	-1	-1	-1	-1	-1
Alpha	NS8	NS8_V62L	V	62	L	3	0.0543	0.9925	1	0.0261132	14.0266	-0.4	0.0261132	14.0266	0.4				17527	4684	FALSE	FALSE	-1	-1	-1	0.977974	2	1
Alpha	NS8	NS8_V99E	V	99	E	1	0.0403	0.0403	-2	-0.891923	29.983	-7.7	0.891923	29.983	7.7				3	0	FALSE	FALSE	-1	-1	-1	-1	-1	-1
Alpha	NS8	NS8_Y111N	Y	111	N	91	0.2159	0.6272	-2	0.000999001	-49.0706	-2.2	0.000999001	49.0706	2.2				10	0	FALSE	FALSE	0.806092	0	0	-1	-1	-1
Alpha	NS8	NS8_Y111S	Y	111	S	1	0.0312	0.0312	-2	-0.298956	-76.0959	0.5	0.298956	76.0959	0.5				4	0	FALSE	FALSE	-1	-1	-1	-1	-1	-1
Alpha	NS8	NS8_Y31F	Y	31	F	1	1	1	3	0.000999001	-15.9994	4.1	0.000999001	15.9994	4.1				11135	26	FALSE	FALSE	-1	-1	-1	-1	-1	-1
Alpha	NSP1	NSP1_A117S	A	117	S	2	0.5017	0.9572	1	-0.335728	15.9994	-2.6	0.335728	15.9994	2.6				1157	45	FALSE	FALSE	-1	-1	-1	-1	-1	-1
Alpha	NSP1	NSP1_A131V	A	131	V	2	0.041	0.0452	0	-0.0618862	28.0531	2.4	0.0618862	28.0531	2.4				4105	64	FALSE	FALSE	-1	-1	-1	-1	-1	-1
Alpha	NSP1	NSP1_A138S	A	138	S	1	0.2919	0.2919	1	-0.335728	15.9994	-2.6	0.335728	15.9994	2.6				172	14	FALSE	FALSE	-1	-1	-1	-1	-1	-1
Alpha	NSP1	NSP1_A138T	A	138	T	1	0.9986	0.9986	0	-0.397678	30.026	-2.5	0.397678	30.026	2.5				2507	303	FALSE	FALSE	-1	-1	-1	-1	-1	-1
Alpha	NSP1	NSP1_A138V	A	138	V	3	0.0471	0.0486	0	-0.0618862	28.0531	2.4	0.0618862	28.0531	2.4				3099	248	FALSE	FALSE	-1	-1	-1	-1	-1	-1
Alpha	NSP1	NSP1_A42V	A	42	V	1	0.0328	0.0328	0	-0.0618862	28.0531	2.4	0.0618862	28.0531	2.4				651	55	FALSE	FALSE	-1	-1	-1	-1	-1	-1
Alpha	NSP1	NSP1_A90T	A	90	T	7	0.0508	0.1078	0	-0.397678	30.026	-2.5	0.397678	30.026	2.5				294	20	FALSE	FALSE	0.945514	1	1	-1	-1	-1
Alpha	NSP1	NSP1_C51S	C	51	S	1	0.037	0.037	-1	-0.290054	-16.0656	-3.3	0.290054	16.0656	3.3				215	5	FALSE	FALSE	-1	-1	-1	-1	-1	-1
Alpha	NSP1	NSP1_D139N	D	139	N	1	0.9875	0.9875	1	0.995698	-0.9848	0	0.995698	0.9848	0				1700	165	FALSE	FALSE	-1	-1	-1	-1	-1	-1
Alpha	NSP1	NSP1_D139Y	D	139	Y	1	0.0805	0.0805	-3	0.994699	48.0858	2.2	0.994699	48.0858	2.2				221	30	FALSE	FALSE	-1	-1	-1	-1	-1	-1
Alpha	NSP1	NSP1_D144A	D	144	A	6	0.9898	0.9971	-2	1.03147	-44.0095	5.3	1.03147	44.0095	5.3				89	2848	FALSE	FALSE	0.529354	0	0	0.992402	5	1
Alpha	NSP1	NSP1_D144G	D	144	G	1	0.9845	0.9845	-1	0.995698	-58.0361	3.1	0.995698	58.0361	3.1				233	8	FALSE	FALSE	-1	-1	-1	-1	-1	-1
Alpha	NSP1	NSP1_D144H	D	144	H	1	0.0992	0.0992	-1	1.08287	22.0519	0.3	1.08287	22.0519	0.3				97	4	FALSE	FALSE	-1	-1	-1	-1	-1	-1
Alpha	NSP1	NSP1_D144Y	D	144	Y	2	0.03055	0.0306	-3	0.994699	48.0858	2.2	0.994699	48.0858	2.2				817	135	FALSE	FALSE	-1	-1	-1	-1	-1	-1
Alpha	NSP1	NSP1_D147N	D	147	N	2	0.9077	0.909	1	0.995698	-0.9848	0	0.995698	0.9848	0				1156	127	FALSE	FALSE	-1	-1	-1	-1	-1	-1
Alpha	NSP1	NSP1_D152A	D	152	A	1	0.0425	0.0425	-2	1.03147	-44.0095	5.3	1.03147	44.0095	5.3				45	2	FALSE	FALSE	-1	-1	-1	-1	-1	-1
Alpha	NSP1	NSP1_D152G	D	152	G	1	0.0302	0.0302	-1	0.995698	-58.0361	3.1	0.995698	58.0361	3.1				199	9	FALSE	FALSE	-1	-1	-1	-1	-1	-1
Alpha	NSP1	NSP1_D156A	D	156	A	1	0.035	0.035	-2	1.03147	-44.0095	5.3	1.03147	44.0095	5.3				44	13	FALSE	FALSE	-1	-1	-1	-1	-1	-1
Alpha	NSP1	NSP1_D33Y	D	33	Y	1	0.0356	0.0356	-3	0.994699	48.0858	2.2	0.994699	48.0858	2.2				320	20	FALSE	FALSE	-1	-1	-1	-1	-1	-1
Alpha	NSP1	NSP1_D48E	D	48	E	1	0.04	0.04	2	0.0776616	14.0266	0	0.0776616	14.0266	0				330	3	FALSE	FALSE	-1	-1	-1	-1	-1	-1
Alpha	NSP1	NSP1_D48N	D	48	N	1	0.8418	0.8418	1	0.995698	-0.9848	0	0.995698	0.9848	0				1510	7	FALSE	FALSE	-1	-1	-1	-1	-1	-1
Alpha	NSP1	NSP1_D75Y	D	75	Y	1	0.0958	0.0958	-3	0.994699	48.0858	2.2	0.994699	48.0858	2.2				249	7	FALSE	FALSE	-1	-1	-1	-1	-1	-1
Alpha	NSP1	NSP1_E102D	E	102	D	1	0.0307	0.0307	2	-0.0776616	-14.0266	0	0.0776616	14.0266	0				177	3	FALSE	FALSE	-1	-1	-1	-1	-1	-1
Alpha	NSP1	NSP1_E102G	E	102	G	1	0.0327	0.0327	-2	0.918037	-72.0627	3.1	0.918037	72.0627	3.1				191	7	FALSE	FALSE	-1	-1	-1	-1	-1	-1
Alpha	NSP1	NSP1_E113G	E	113	G	1	0.0347	0.0347	-2	0.918037	-72.0627	3.1	0.918037	72.0627	3.1				114	7	FALSE	FALSE	-1	-1	-1	-1	-1	-1
Alpha	NSP1	NSP1_E155G	E	155	G	1	0.0361	0.0361	-2	0.918037	-72.0627	3.1	0.918037	72.0627	3.1				130	6	FALSE	FALSE	-1	-1	-1	-1	-1	-1
Alpha	NSP1	NSP1_E159K	E	159	K	1	0.0316	0.0316	1	1.91704	-0.9417	-0.4	1.91704	0.9417	0.4				230	27	FALSE	FALSE	-1	-1	-1	-1	-1	-1
Alpha	NSP1	NSP1_E2K	E	2	K	1	0.9721	0.9721	1	1.91704	-0.9417	-0.4	1.91704	0.9417	0.4				1207	32	FALSE	FALSE	-1	-1	-1	-1	-1	-1
Alpha	NSP1	NSP1_E36K	E	36	K	1	0.0342	0.0342	1	1.91704	-0.9417	-0.4	1.91704	0.9417	0.4				331	7	FALSE	FALSE	-1	-1	-1	-1	-1	-1
Alpha	NSP1	NSP1_E37D	E	37	D	1	1	1	2	-0.0776616	-14.0266	0	0.0776616	14.0266	0				2890	795	FALSE	FALSE	-1	-1	-1	-1	-1	-1
Alpha	NSP1	NSP1_E41Q	E	41	Q	1	0.033	0.033	2	0.918037	-0.9848	0	0.918037	0.9848	0				79	0	FALSE	FALSE	-1	-1	-1	-1	-1	-1
Alpha	NSP1	NSP1_E41V	E	41	V	1	0.0358	0.0358	-2	0.891923	-29.983	7.7	0.891923	29.983	7.7				27	1	FALSE	FALSE	-1	-1	-1	-1	-1	-1
Alpha	NSP1	NSP1_E55K	E	55	K	2	0.99055	0.9993	1	1.91704	-0.9417	-0.4	1.91704	0.9417	0.4				815	108	FALSE	FALSE	-1	-1	-1	-1	-1	-1
Alpha	NSP1	NSP1_E65L	E	65	L	1	0.0304	0.0304	-3	0.918037	-15.9564	7.3	0.918037	15.9564	7.3				0	1	FALSE	FALSE	-1	-1	-1	-1	-1	-1
Alpha	NSP1	NSP1_E65Q	E	65	Q	1	0.0982	0.0982	2	0.918037	-0.9848	0	0.918037	0.9848	0				3	0	FALSE	FALSE	-1	-1	-1	-1	-1	-1
Alpha	NSP1	NSP1_E91D	E	91	D	5	0.0881	0.1058	2	-0.0776616	-14.0266	0	0.0776616	14.0266	0				18	2	FALSE	FALSE	-1	-1	-1	-1	-1	-1
Alpha	NSP1	NSP1_E93D	E	93	D	2	0.89805	0.9066	2	-0.0776616	-14.0266	0	0.0776616	14.0266	0				519	18	FALSE	FALSE	-1	-1	-1	-1	-1	-1
Alpha	NSP1	NSP1_E93V	E	93	V	1	0.0431	0.0431	-2	0.891923	-29.983	7.7	0.891923	29.983	7.7				3	0	FALSE	FALSE	-1	-1	-1	-1	-1	-1
Alpha	NSP1	NSP1_F143L	F	143	L	4	0.99155	0.9934	0	0	-34.0162	1	0	34.0162	1				1794	146	FALSE	FALSE	-1	-1	-1	-1	-1	-1
Alpha	NSP1	NSP1_F143S	F	143	S	2	0.0368	0.0387	-2	-0.299955	-60.0965	-3.6	0.299955	60.0965	3.6				96	7	FALSE	FALSE	-1	-1	-1	-1	-1	-1
Alpha	NSP1	NSP1_F157V	F	157	V	1	0.0436	0.0436	-1	-0.0261132	-48.0428	1.4	0.0261132	48.0428	1.4				6	2	FALSE	FALSE	-1	-1	-1	-1	-1	-1
Alpha	NSP1	NSP1_G127F	G	127	F	3	0.0372	0.0542	-3	0	90.1225	3.2	0	90.1225	3.2				2	1	FALSE	FALSE	-1	-1	-1	-1	-1	-1
Alpha	NSP1	NSP1_G127R	G	127	R	4	0.0333	0.0392	-2	0.99999	99.1344	-4.1	0.99999	99.1344	4.1				9	1	FALSE	FALSE	-1	-1	-1	-1	-1	-1
Alpha	NSP1	NSP1_G127S	G	127	S	7	0.0378	0.0693	0	-0.299955	30.026	-0.4	0.299955	30.026	0.4				354	7	FALSE	FALSE	0.968278	1	1	-1	-1	-1
Alpha	NSP1	NSP1_G127V	G	127	V	1	0.2523	0.2523	-3	-0.0261132	42.0797	4.6	0.0261132	42.0797	4.6				105	5	FALSE	FALSE	-1	-1	-1	-1	-1	-1
Alpha	NSP1	NSP1_G130K	G	130	K	3	0.0308	0.0618	-2	0.999001	71.121	-3.5	0.999001	71.121	3.5				4	0	FALSE	FALSE	-1	-1	-1	-1	-1	-1
Alpha	NSP1	NSP1_G130R	G	130	R	3	0.0424	0.0493	-2	0.99999	99.1344	-4.1	0.99999	99.1344	4.1				886	6	FALSE	FALSE	-1	-1	-1	-1	-1	-1
Alpha	NSP1	NSP1_G130V	G	130	V	1	0.0485	0.0485	-3	-0.0261132	42.0797	4.6	0.0261132	42.0797	4.6				93	3	FALSE	FALSE	-1	-1	-1	-1	-1	-1
Alpha	NSP1	NSP1_G132S	G	132	S	1	0.0323	0.0323	0	-0.299955	30.026	-0.4	0.299955	30.026	0.4				308	11	FALSE	FALSE	-1	-1	-1	-1	-1	-1
Alpha	NSP1	NSP1_G132V	G	132	V	1	0.0395	0.0395	-3	-0.0261132	42.0797	4.6	0.0261132	42.0797	4.6				79	10	FALSE	FALSE	-1	-1	-1	-1	-1	-1
Alpha	NSP1	NSP1_G133V	G	133	V	2	0.0343	0.0372	-3	-0.0261132	42.0797	4.6	0.0261132	42.0797	4.6				144	6	FALSE	FALSE	-1	-1	-1	-1	-1	-1
Alpha	NSP1	NSP1_G146C	G	146	C	1	0.0324	0.0324	-3	-0.00990099	46.0916	2.9	0.00990099	46.0916	2.9				855	176	FALSE	FALSE	-1	-1	-1	-1	-1	-1
Alpha	NSP1	NSP1_G146V	G	146	V	1	0.0368	0.0368	-3	-0.0261132	42.0797	4.6	0.0261132	42.0797	4.6				41	9	FALSE	FALSE	-1	-1	-1	-1	-1	-1
Alpha	NSP1	NSP1_G150C	G	150	C	1	0.6194	0.6194	-3	-0.00990099	46.0916	2.9	0.00990099	46.0916	2.9				581	163	FALSE	FALSE	-1	-1	-1	-1	-1	-1
Alpha	NSP1	NSP1_G168V	G	168	V	1	0.0322	0.0322	-3	-0.0261132	42.0797	4.6	0.0261132	42.0797	4.6				69	2	FALSE	FALSE	-1	-1	-1	-1	-1	-1
Alpha	NSP1	NSP1_G30S	G	30	S	1	0.9092	0.9092	0	-0.299955	30.026	-0.4	0.299955	30.026	0.4				528	51	FALSE	FALSE	-1	-1	-1	-1	-1	-1
Alpha	NSP1	NSP1_G32F	G	32	F	1	0.0727	0.0727	-3	0	90.1225	3.2	0	90.1225	3.2				0	0	FALSE	FALSE	-1	-1	-1	-1	-1	-1
Alpha	NSP1	NSP1_G32V	G	32	V	2	0.03925	0.0447	-3	-0.0261132	42.0797	4.6	0.0261132	42.0797	4.6				35	2	FALSE	FALSE	-1	-1	-1	-1	-1	-1
Alpha	NSP1	NSP1_G49V	G	49	V	29	0.0404	0.1511	-3	-0.0261132	42.0797	4.6	0.0261132	42.0797	4.6				44	1	FALSE	FALSE	0.480814	0	0	-1	-1	-1
Alpha	NSP1	NSP1_G7V	G	7	V	1	0.071	0.071	-3	-0.0261132	42.0797	4.6	0.0261132	42.0797	4.6				373	20	FALSE	FALSE	-1	-1	-1	-1	-1	-1
Alpha	NSP1	NSP1_G82A	G	82	A	1	0.0333	0.0333	0	0.035773	14.0266	2.2	0.035773	14.0266	2.2				22	0	FALSE	FALSE	-1	-1	-1	-1	-1	-1
Alpha	NSP1	NSP1_G82D	G	82	D	1	0.9884	0.9884	-1	-0.995698	58.0361	-3.1	0.995698	58.0361	3.1				4577	13	FALSE	FALSE	-1	-1	-1	-1	-1	-1
Alpha	NSP1	NSP1_G82E	G	82	E	2	0.5163	0.9925	-2	-0.918037	72.0627	-3.1	0.918037	72.0627	3.1				49	0	FALSE	FALSE	-1	-1	-1	-1	-1	-1
Alpha	NSP1	NSP1_G82V	G	82	V	1	0.0349	0.0349	-3	-0.0261132	42.0797	4.6	0.0261132	42.0797	4.6				203	22	FALSE	FALSE	-1	-1	-1	-1	-1	-1
Alpha	NSP1	NSP1_G98S	G	98	S	1	0.0833	0.0833	0	-0.299955	30.026	-0.4	0.299955	30.026	0.4				1643	95	FALSE	FALSE	-1	-1	-1	-1	-1	-1
Alpha	NSP1	NSP1_H110D	H	110	D	2	0.04885	0.0514	-1	-1.08287	-22.0519	-0.3	1.08287	22.0519	0.3				54	0	FALSE	FALSE	-1	-1	-1	-1	-1	-1
Alpha	NSP1	NSP1_H110Y	H	110	Y	1	0.0376	0.0376	2	-0.0881732	26.0339	1.9	0.0881732	26.0339	1.9				28960	2609	FALSE	FALSE	-1	-1	-1	0.859	0	0
Alpha	NSP1	NSP1_H134Y	H	134	Y	2	0.0706	0.0803	2	-0.0881732	26.0339	1.9	0.0881732	26.0339	1.9				481	10	FALSE	FALSE	-1	-1	-1	-1	-1	-1
Alpha	NSP1	NSP1_H13Q	H	13	Q	1	0.0353	0.0353	0	-0.0871742	-9.0101	-0.3	0.0871742	9.0101	0.3				53	1	FALSE	FALSE	-1	-1	-1	-1	-1	-1
Alpha	NSP1	NSP1_H45Q	H	45	Q	1	0.0481	0.0481	0	-0.0871742	-9.0101	-0.3	0.0871742	9.0101	0.3				102	18	FALSE	FALSE	-1	-1	-1	-1	-1	-1
Alpha	NSP1	NSP1_H45R	H	45	R	1	0.0333	0.0333	0	0.912816	19.0464	-1.3	0.912816	19.0464	1.3				274	19	FALSE	FALSE	-1	-1	-1	-1	-1	-1
Alpha	NSP1	NSP1_H45Y	H	45	Y	3	0.8989	0.9826	2	-0.0881732	26.0339	1.9	0.0881732	26.0339	1.9				4131	357	FALSE	FALSE	-1	-1	-1	-1	-1	-1
Alpha	NSP1	NSP1_H83L	H	83	L	1	0.7458	0.7458	-3	-0.0871742	-23.9817	7	0.0871742	23.9817	7				124	8	FALSE	FALSE	-1	-1	-1	-1	-1	-1
Alpha	NSP1	NSP1_H83P	H	83	P	1	0.0322	0.0322	-2	0.111253	-40.0241	1.6	0.111253	40.0241	1.6				43	0	FALSE	FALSE	-1	-1	-1	-1	-1	-1
Alpha	NSP1	NSP1_I114M	I	114	M	1	0.0311	0.0311	1	-0.259747	18.0384	-2.6	0.259747	18.0384	2.6				244	53	FALSE	FALSE	-1	-1	-1	-1	-1	-1
Alpha	NSP1	NSP1_I114T	I	114	T	2	0.99315	0.9962	-1	-0.361905	-12.0537	-5.2	0.361905	12.0537	5.2				4294	225	FALSE	FALSE	-1	-1	-1	-1	-1	-1
Alpha	NSP1	NSP1_K11E	K	11	E	1	0.0329	0.0329	1	-1.91704	0.9417	0.4	1.91704	0.9417	0.4				82	3	FALSE	FALSE	-1	-1	-1	-1	-1	-1
Alpha	NSP1	NSP1_K125E	K	125	E	1	0.0524	0.0524	1	-1.91704	0.9417	0.4	1.91704	0.9417	0.4				110	3	FALSE	FALSE	-1	-1	-1	-1	-1	-1
Alpha	NSP1	NSP1_K129I	K	129	I	1	0.048	0.048	-3	-0.999001	-15.0147	8.4	0.999001	15.0147	8.4				11	0	FALSE	FALSE	-1	-1	-1	-1	-1	-1
Alpha	NSP1	NSP1_K129T	K	129	T	8	0.03955	0.07	-1	-1.36091	-27.0684	3.2	1.36091	27.0684	3.2				9	1	FALSE	FALSE	0.841575	0	0	-1	-1	-1
Alpha	NSP1	NSP1_K141D	K	141	D	2	0.0632	0.0639	-1	-1.9947	-13.0849	0.4	1.9947	13.0849	0.4				46	0	FALSE	FALSE	-1	-1	-1	-1	-1	-1
Alpha	NSP1	NSP1_K141N	K	141	N	1	0.0768	0.0768	0	-0.999001	-14.0697	0.4	0.999001	14.0697	0.4				553	92	FALSE	FALSE	-1	-1	-1	-1	-1	-1
Alpha	NSP1	NSP1_K47R	K	47	R	1	0.0376	0.0376	2	0.000989001	28.0134	-0.6	0.000989001	28.0134	0.6				928747	44	TRUE	TRUE	-1	-1	-1	-1	-1	-1
Alpha	NSP1	NSP1_K47T	K	47	T	1	0.0435	0.0435	-1	-1.36091	-27.0684	3.2	1.36091	27.0684	3.2				5	1	FALSE	FALSE	-1	-1	-1	-1	-1	-1
Alpha	NSP1	NSP1_L104I	L	104	I	1	0.0805	0.0805	2	0	0	0.7	0	0	0.7				1159	15	FALSE	FALSE	-1	-1	-1	-1	-1	-1
Alpha	NSP1	NSP1_L107F	L	107	F	1	0.0349	0.0349	0	0	34.0162	-1	0	34.0162	1				1752	118	FALSE	FALSE	-1	-1	-1	-1	-1	-1
Alpha	NSP1	NSP1_L140I	L	140	I	2	0.03785	0.0407	2	0	0	0.7	0	0	0.7				178	6	FALSE	FALSE	-1	-1	-1	-1	-1	-1
Alpha	NSP1	NSP1_L173F	L	173	F	1	0.0455	0.0455	0	0	34.0162	-1	0	34.0162	1				209	6	FALSE	FALSE	-1	-1	-1	-1	-1	-1
Alpha	NSP1	NSP1_L173P	L	173	P	1	0.0485	0.0485	-3	0.198427	-16.0424	-5.4	0.198427	16.0424	5.4				92	18	FALSE	FALSE	-1	-1	-1	-1	-1	-1
Alpha	NSP1	NSP1_L177F	L	177	F	1	0.0312	0.0312	0	0	34.0162	-1	0	34.0162	1				855	27	FALSE	FALSE	-1	-1	-1	-1	-1	-1
Alpha	NSP1	NSP1_L18S	L	18	S	8	0.0497	0.0952	-2	-0.299955	-26.0803	-4.6	0.299955	26.0803	4.6				49	3	FALSE	FALSE	0.348056	0	0	-1	-1	-1
Alpha	NSP1	NSP1_L21K	L	21	K	15	0.0575	0.4528	-2	0.999001	15.0147	-7.7	0.999001	15.0147	7.7				56	2	FALSE	FALSE	0.61569	0	0	-1	-1	-1
Alpha	NSP1	NSP1_L27F	L	27	F	6	0.99735	1	0	0	34.0162	-1	0	34.0162	1				3901	433	FALSE	FALSE	0.999961	3	1	-1	-1	-1
Alpha	NSP1	NSP1_L27I	L	27	I	1	1	1	2	0	0	0.7	0	0	0.7				363	40	FALSE	FALSE	-1	-1	-1	-1	-1	-1
Alpha	NSP1	NSP1_L39C	L	39	C	1	0.0328	0.0328	-1	-0.00990099	-10.0147	-1.3	0.00990099	10.0147	1.3				0	0	FALSE	FALSE	-1	-1	-1	-1	-1	-1
Alpha	NSP1	NSP1_L39V	L	39	V	1	0.0328	0.0328	1	-0.0261132	-14.0266	0.4	0.0261132	14.0266	0.4				26	2	FALSE	FALSE	-1	-1	-1	-1	-1	-1
Alpha	NSP1	NSP1_L46F	L	46	F	1	0.0465	0.0465	0	0	34.0162	-1	0	34.0162	1				1281	81	FALSE	FALSE	-1	-1	-1	-1	-1	-1
Alpha	NSP1	NSP1_L46P	L	46	P	2	0.044	0.0481	-3	0.198427	-16.0424	-5.4	0.198427	16.0424	5.4				125	1	FALSE	FALSE	-1	-1	-1	-1	-1	-1
Alpha	NSP1	NSP1_L4F	L	4	F	2	0.99015	0.9929	0	0	34.0162	-1	0	34.0162	1				1553	137	FALSE	FALSE	-1	-1	-1	-1	-1	-1
Alpha	NSP1	NSP1_L4I	L	4	I	1	0.0467	0.0467	2	0	0	0.7	0	0	0.7				56	5	FALSE	FALSE	-1	-1	-1	-1	-1	-1
Alpha	NSP1	NSP1_L61F	L	61	F	1	0.0764	0.0764	0	0	34.0162	-1	0	34.0162	1				829	28	FALSE	FALSE	-1	-1	-1	-1	-1	-1
Alpha	NSP1	NSP1_L92F	L	92	F	9	0.9989	1	0	0	34.0162	-1	0	34.0162	1				3737	647	FALSE	FALSE	0.878262	0	0	-1	-1	-1
Alpha	NSP1	NSP1_L92P	L	92	P	1	0.0372	0.0372	-3	0.198427	-16.0424	-5.4	0.198427	16.0424	5.4				231	2	FALSE	FALSE	-1	-1	-1	-1	-1	-1
Alpha	NSP1	NSP1_M174I	M	174	I	1	0.1739	0.1739	1	0.259747	-18.0384	2.6	0.259747	18.0384	2.6				536	42	FALSE	FALSE	-1	-1	-1	-1	-1	-1
Alpha	NSP1	NSP1_M85H	M	85	H	1	0.4574	0.4574	-2	0.346921	5.9433	-5.1	0.346921	5.9433	5.1				32	0	FALSE	FALSE	-1	-1	-1	-1	-1	-1
Alpha	NSP1	NSP1_M85I	M	85	I	1	0.0584	0.0584	1	0.259747	-18.0384	2.6	0.259747	18.0384	2.6				1325	64	FALSE	FALSE	-1	-1	-1	-1	-1	-1
Alpha	NSP1	NSP1_M85P	M	85	P	1	0.4961	0.4961	-2	0.458174	-34.0808	-3.5	0.458174	34.0808	3.5				15	0	FALSE	FALSE	-1	-1	-1	-1	-1	-1
Alpha	NSP1	NSP1_M85R	M	85	R	5	0.055	0.1132	-1	1.25974	24.9897	-6.4	1.25974	24.9897	6.4				31	2	FALSE	FALSE	-1	-1	-1	-1	-1	-1
Alpha	NSP1	NSP1_M85S	M	85	S	1	0.035	0.035	-1	-0.0402082	-44.1187	-2.7	0.0402082	44.1187	2.7				10	0	FALSE	FALSE	-1	-1	-1	-1	-1	-1
Alpha	NSP1	NSP1_M85T	M	85	T	1	0.034	0.034	-1	-0.102158	-30.0921	-2.6	0.102158	30.0921	2.6				156	7	FALSE	FALSE	-1	-1	-1	-1	-1	-1
Alpha	NSP1	NSP1_M85V	M	85	V	2	0.0529	0.066	1	0.233634	-32.065	2.3	0.233634	32.065	2.3				37508	477	FALSE	FALSE	-1	-1	-1	-1	-1	-1
Alpha	NSP1	NSP1_N126S	N	126	S	1	0.0569	0.0569	1	-0.299955	-27.0253	2.7	0.299955	27.0253	2.7				650	266	FALSE	FALSE	-1	-1	-1	-1	-1	-1
Alpha	NSP1	NSP1_N126T	N	126	T	8	0.0357	0.0717	0	-0.361905	-12.9987	2.8	0.361905	12.9987	2.8				24	3	FALSE	FALSE	0.968278	1	1	-1	-1	-1
Alpha	NSP1	NSP1_N128I	N	128	I	20	0.036	0.1295	-3	0	-0.945	8	0	0.945	8				72	4	FALSE	FALSE	0.841575	0	0	-1	-1	-1
Alpha	NSP1	NSP1_N128T	N	128	T	1	0.045	0.045	0	-0.361905	-12.9987	2.8	0.361905	12.9987	2.8				59	0	FALSE	FALSE	-1	-1	-1	-1	-1	-1
Alpha	NSP1	NSP1_P109H	P	109	H	2	0.0469	0.0498	-2	-0.111253	40.0241	-1.6	0.111253	40.0241	1.6				141	5	FALSE	FALSE	-1	-1	-1	-1	-1	-1
Alpha	NSP1	NSP1_P109S	P	109	S	1	0.0383	0.0383	-1	-0.498382	-10.0379	0.8	0.498382	10.0379	0.8				435	14	FALSE	FALSE	-1	-1	-1	-1	-1	-1
Alpha	NSP1	NSP1_P115L	P	115	L	2	0.05015	0.0682	-3	-0.198427	16.0424	5.4	0.198427	16.0424	5.4				204	13	FALSE	FALSE	-1	-1	-1	-1	-1	-1
Alpha	NSP1	NSP1_P153N	P	153	N	1	0.0302	0.0302	-2	-0.198427	16.9874	-1.9	0.198427	16.9874	1.9				0	0	FALSE	FALSE	-1	-1	-1	-1	-1	-1
Alpha	NSP1	NSP1_P67H	P	67	H	1	0.0318	0.0318	-2	-0.111253	40.0241	-1.6	0.111253	40.0241	1.6				57	1	FALSE	FALSE	-1	-1	-1	-1	-1	-1
Alpha	NSP1	NSP1_P80F	P	80	F	1	0.0333	0.0333	-4	-0.198427	50.0586	4.4	0.198427	50.0586	4.4				0	0	FALSE	FALSE	-1	-1	-1	-1	-1	-1
Alpha	NSP1	NSP1_P80L	P	80	L	1	0.1055	0.1055	-3	-0.198427	16.0424	5.4	0.198427	16.0424	5.4				875	60	FALSE	FALSE	-1	-1	-1	-1	-1	-1
Alpha	NSP1	NSP1_P80S	P	80	S	1	0.9908	0.9908	-1	-0.498382	-10.0379	0.8	0.498382	10.0379	0.8				2497	440	FALSE	FALSE	-1	-1	-1	-1	-1	-1
Alpha	NSP1	NSP1_Q22D	Q	22	D	1	0.0403	0.0403	0	-0.995698	-13.0418	0	0.995698	13.0418	0				3	0	FALSE	FALSE	-1	-1	-1	-1	-1	-1
Alpha	NSP1	NSP1_Q44R	Q	44	R	1	0.0326	0.0326	1	0.99999	28.0565	-1	0.99999	28.0565	1				441	40	FALSE	FALSE	-1	-1	-1	-1	-1	-1
Alpha	NSP1	NSP1_Q63L	Q	63	L	2	0.856	0.8598	-2	0	-14.9716	7.3	0	14.9716	7.3				121	13	FALSE	FALSE	-1	-1	-1	-1	-1	-1
Alpha	NSP1	NSP1_R124C	R	124	C	4	0.05385	0.1277	-3	-1.00989	-53.0428	7	1.00989	53.0428	7				9661	263	FALSE	FALSE	-1	-1	-1	-1	-1	-1
Alpha	NSP1	NSP1_R24C	R	24	C	1	0.96	0.96	-3	-1.00989	-53.0428	7	1.00989	53.0428	7				14020	3218	FALSE	FALSE	-1	-1	-1	0.889725	0	0
Alpha	NSP1	NSP1_R77Q	R	77	Q	1	0.0391	0.0391	1	-0.99999	-28.0565	1	0.99999	28.0565	1				736	33	FALSE	FALSE	-1	-1	-1	-1	-1	-1
Alpha	NSP1	NSP1_S100N	S	100	N	1	0.1199	0.1199	1	0.299955	27.0253	-2.7	0.299955	27.0253	2.7				2775	13	FALSE	FALSE	-1	-1	-1	-1	-1	-1
Alpha	NSP1	NSP1_S135I	S	135	I	1	0.0674	0.0674	-2	0.299955	26.0803	5.3	0.299955	26.0803	5.3				51	6	FALSE	FALSE	-1	-1	-1	-1	-1	-1
Alpha	NSP1	NSP1_S166G	S	166	G	1	1	1	0	0.299955	-30.026	0.4	0.299955	30.026	0.4				5511	740	FALSE	FALSE	-1	-1	-1	-1	-1	-1
Alpha	NSP1	NSP1_S167I	S	167	I	1	0.047	0.047	-2	0.299955	26.0803	5.3	0.299955	26.0803	5.3				27	0	FALSE	FALSE	-1	-1	-1	-1	-1	-1
Alpha	NSP1	NSP1_S34F	S	34	F	1	0.0515	0.0515	-2	0.299955	60.0965	3.6	0.299955	60.0965	3.6				527	36	FALSE	FALSE	-1	-1	-1	-1	-1	-1
Alpha	NSP1	NSP1_S34T	S	34	T	1	0.9395	0.9395	1	-0.0619499	14.0266	0.1	0.0619499	14.0266	0.1				525	72	FALSE	FALSE	-1	-1	-1	-1	-1	-1
Alpha	NSP1	NSP1_S40C	S	40	C	1	0.0368	0.0368	-1	0.290054	16.0656	3.3	0.290054	16.0656	3.3				0	0	FALSE	FALSE	-1	-1	-1	-1	-1	-1
Alpha	NSP1	NSP1_S40L	S	40	L	2	0.51555	0.9981	-2	0.299955	26.0803	4.6	0.299955	26.0803	4.6				2286	60	FALSE	FALSE	-1	-1	-1	-1	-1	-1
Alpha	NSP1	NSP1_T12I	T	12	I	1	0.0432	0.0432	-1	0.361905	12.0537	5.2	0.361905	12.0537	5.2				2182	134	FALSE	FALSE	-1	-1	-1	-1	-1	-1
Alpha	NSP1	NSP1_T163I	T	163	I	1	0.0481	0.0481	-1	0.361905	12.0537	5.2	0.361905	12.0537	5.2				489	34	FALSE	FALSE	-1	-1	-1	-1	-1	-1
Alpha	NSP1	NSP1_T170I	T	170	I	1	0.0359	0.0359	-1	0.361905	12.0537	5.2	0.361905	12.0537	5.2				47511	154	TRUE	FALSE	-1	-1	-1	-1	-1	-1
Alpha	NSP1	NSP1_T170P	T	170	P	1	0.0624	0.0624	-1	0.560332	-3.9887	-0.9	0.560332	3.9887	0.9				2	0	FALSE	FALSE	-1	-1	-1	-1	-1	-1
Alpha	NSP1	NSP1_V108D	V	108	D	1	0.0472	0.0472	-3	-0.969585	15.9564	-7.7	0.969585	15.9564	7.7				17	0	FALSE	FALSE	-1	-1	-1	-1	-1	-1
Alpha	NSP1	NSP1_V108L	V	108	L	2	0.03745	0.04	1	0.0261132	14.0266	-0.4	0.0261132	14.0266	0.4				10	1	FALSE	FALSE	-1	-1	-1	-1	-1	-1
Alpha	NSP1	NSP1_V169I	V	169	I	1	0.0317	0.0317	3	0.0261132	14.0266	0.3	0.0261132	14.0266	0.3				106	5	FALSE	FALSE	-1	-1	-1	-1	-1	-1
Alpha	NSP1	NSP1_V20L	V	20	L	1	0.0435	0.0435	1	0.0261132	14.0266	-0.4	0.0261132	14.0266	0.4				14	0	FALSE	FALSE	-1	-1	-1	-1	-1	-1
[truncated: 5,139 more rows]

## Sheet: Supplementary Table 1c
						Intrahost predictors			Physiochemical predictors							DMS predictors							Linkage predictors
[truncated: 9,562 more rows]

## Sheet: Supplementary Table 1d
						Intrahost predictors			Physiochemical predictors							DMS predictors							Linkage predictors
[truncated: 9,105 more rows]

[truncated: 3 more sheets: Supplementary Table 1e, Supplementary Table 1f, Supplementary Table 1g]
